# Supplementary material for: Construction of heat stress regulation networks based on Illumina and SMRT sequencing data in potato
Source: Front Plant Sci. 2023 Nov 2;14:1271084. doi: 10.3389/fpls.2023.1271084 (PMC10651764; doi:10.3389/fpls.2023.1271084)
Supplement: Supplementary Table 1 — The primer sequences used for qRT-PCR validation in this study. [file Table_1.xlsx]

## Sheet: DETFs primer
	Primer	Sequence
	Q-StEF-1α-F	ATTGGAAACGGATATGCTCCA
	Q-StEF-1α-R	TCCTTACCTGAACGCCTGTCA
	Q-StHSF5-F	TTGGCTTCATGTCTTTCACAAG
	Q-StHSF5-R	CAGACTGTGATTCGAAACGTTT
	Q-StbZIP1-F	CAAGTTCTATTGCCGCTAGTTC
	Q-StbZIP1-R	CCGGTACTCTTCTGATCTCATC
	Q-StDBB2-F	GCAGAATTGTGACATTACGCTA
	Q-StDBB2-R	CTAACATTGGTGCACTCTGATG
	Q-StTALE1-F	GGCAACAACTTTTCATCAAGGA
	Q-StTALE1-R	TCTTGTAATAGTTGAGTGGCGT
	Q-StDOF3-F	ATTCATGATCCAAATGAAGCGG
	Q-StDOF3-R	TTTTGGATTGAAGGCACTGAAG
	Q-StMYB-related2-F	CAGTTCAAAAGTTGTCGGTCTT
	Q-StMYB-related2-R	CACGATTGGAGAGTCTTACAGA
	Q-StTCP3-F	GAATTAGCTCGACAACACACTC
	Q-StTCP3-R	AAACCTGAAACTATGCTCAGGA
	Q-StNin-like1-F	GTACCGATAAATAGGGATGGCA
	Q-StNin-like1-R	GTACATCATACTGCTGTGCATG
	Q-StWRKY2-F	CACATACTTTGGCAATCACACT
	Q-StWRKY2-R	GTACTGTAGAGTCACTGTGCTT

## Sheet: DELs primer
	Primer	Sequence
	Q-PB.4339.7-F	TTGCTAAGTGGTCTGTATCT
	Q-PB.4339.7-R	CAATAGCCTTATCCGTTCTG
	Q-PB.10046.5-F	CTCTTAGCGATCCTAGTTCAA
	Q-PB.10046.5-R	CCGAGTTCAAGCAATATGTC
	Q-PB.4534.3-F	CCTTGGAGACACTAAGATGAT
	Q-PB.4534.3-R	CTGCTACTACTGCTTATGCTA
	Q-PB.11157.1-F	CTCGAACCTGTGACCTATAG
	Q-PB.11157.1-R	CAGAATCTTGTTGTTGGAGTC
