# Supplementary material for: Construction of heat stress regulation networks based on Illumina and SMRT sequencing data in potato
Source: Front Plant Sci. 2023 Nov 2;14:1271084. doi: 10.3389/fpls.2023.1271084 (PMC10651764; doi:10.3389/fpls.2023.1271084)
Supplement: Supplementary Table 2 — Summary of Illumina transcriptome sequencing data mapping on potato reference genome. [file Table_2.xlsx]

## Sheet: AllSample
	Sample	Total Reads	Mapped reads	Uniquely mapped reads	Multiple mapped reads	Q20(%)	CycleQ20(%)	Q30(%)
	H-0h-1	50823974	0.8886	0.6838	0.2048	97.85	100	93.88
	H-0h-2	52538582	0.9214	0.709	0.2124	97.85	100	93.81
	H-0h-3	47008228	0.9184	0.7049	0.2136	97.73	100	93.61
	H-0.5h-1	49032292	0.9167	0.7151	0.2016	97.87	100	93.81
	H-0.5h-2	47945780	0.9091	0.7024	0.2067	97.61	100	93.27
	H-0.5h-3	53207346	0.9134	0.7098	0.2036	97.68	100	93.45
	H-1h-1	48934814	0.9044	0.6965	0.2079	97.67	100	93.44
	H-1h-2	53796746	0.9091	0.7017	0.2074	97.85	100	93.86
	H-1h-3	49290688	0.9121	0.7003	0.2118	97.6	100	93.35
	H-3h-1	51852760	0.9058	0.701	0.2048	97.9	100	93.93
	H-3h-2	43687214	0.9161	0.712	0.2041	97.91	100	93.92
	H-3h-3	44916580	0.915	0.7135	0.2015	97.76	100	93.69
	H-6h-1	44513854	0.9004	0.694	0.2064	97.82	100	93.89
	H-6h-2	40188610	0.8901	0.6876	0.2024	97.65	100	93.49
	H-6h-3	45530700	0.9022	0.6946	0.2076	97.82	100	93.8
	H-12h-1	43167162	0.8984	0.6913	0.2071	97.75	100	93.65
	H-12h-2	41093864	0.8999	0.6962	0.2036	97.77	100	93.74
	H-12h-3	49151482	0.9026	0.6936	0.209	97.86	100	93.89
	H-24h-1	57738666	0.9083	0.6982	0.2102	97.83	100	93.84
	H-24h-2	50787170	0.8818	0.677	0.2048	97.91	100	93.96
	H-24h-3	47846738	0.8869	0.6784	0.2085	97.66	100	93.49
	H-48h-1	44113914	0.9078	0.6967	0.2111	97.78	100	93.81
	H-48h-2	51144364	0.9094	0.6897	0.2198	97.81	100	93.82
	H-48h-3	44921192	0.9075	0.6973	0.2102	97.81	100	93.79
