# Supplementary material for: Construction of heat stress regulation networks based on Illumina and SMRT sequencing data in potato
Source: Front Plant Sci. 2023 Nov 2;14:1271084. doi: 10.3389/fpls.2023.1271084 (PMC10651764; doi:10.3389/fpls.2023.1271084)
Supplement: Supplementary Table 3 — Statistics of the number of differentially expressed genes. [file Table_3.xlsx]

## Sheet: Sheet1
#ID	H-0h-1_FPKM	H-0h-2_FPKM	H-0h-3_FPKM	H-12h-1_FPKM	H-12h-2_FPKM	H-12h-3_FPKM	H-1h-1_FPKM	H-1h-2_FPKM	H-1h-3_FPKM	H-24h-1_FPKM	H-24h-2_FPKM	H-24h-3_FPKM	H-30m-1_FPKM	H-30m-2_FPKM	H-30m-3_FPKM	H-3h-1_FPKM	H-3h-2_FPKM	H-3h-3_FPKM	H-48h-1_FPKM	H-48h-2_FPKM	H-48h-3_FPKM	H-6h-1_FPKM	H-6h-2_FPKM	H-6h-3_FPKM	eggNOG_class_annotation	nr_annotation
RHC12H2G2891.2.gene	5.051	5.11064	5.07521	8.37221	6.55308	7.59086	4.82257	5.62932	4.62119	3.76494	6.83366	5.34616	3.62923	4.92232	3.42355	5.81476	5.26471	6.05072	4.13903	4.27371	6.50234	4.90219	6.47943	6.82722	Function unknown	PREDICTED: protein trichome birefringence-like 16 [Solanum pennellii]
RHC12H2G2890.2.gene	54.2058	37.5044	38.1581	50.9061	34.3895	32.9139	51.2272	48.6959	46.0479	26.6345	48.5357	33.9193	43.8859	41.069	33.9039	39.8587	53.7682	44.8018	32.0775	42.3232	49.9402	29.4803	29.1325	26.8778	Posttranslational modification, protein turnover, chaperones	PREDICTED: proteasome subunit alpha type-6 [Solanum lycopersicum]
RHC12H2G2888.2.gene	25.1761	26.5905	45.2918	24.986	34.2123	28.0808	32.1297	32.3743	35.4965	32.6634	30.5844	24.2235	28.2208	26.3456	22.3342	24.8306	20.0698	38.9169	33.2926	24.4845	24.7998	28.539	35.6833	23.9166	Posttranslational modification, protein turnover, chaperones	PREDICTED: RING-box protein 1a [Solanum lycopersicum]
RHC12H2G2887.2.gene	4.41403	4.66603	3.07756	3.12481	5.18378	4.75706	1.0956	1.23201	0.919725	1.97349	2.06629	2.36056	1.14233	1.33065	1.03029	3.03836	3.13127	2.85281	2.16863	0.811493	1.49634	1.76848	3.69996	1.92911	Function unknown	PREDICTED: (RS)-norcoclaurine 6-O-methyltransferase-like isoform X2 [Solanum tuberosum]
RHC12H2G2881.2.gene	7.63704	8.34256	8.89166	7.00205	5.91653	6.02478	5.99355	0.094146	0	6.70694	7.10853	7.06841	3.37676	6.87139	4.0706	5.01413	5.05994	0	7.13388	7.301	6.71872	5.31449	5.49938	6.13056	Function unknown	PREDICTED: uncharacterized protein LOC107767915 [Nicotiana tabacum]
RHC12H2G2880.2.gene	28.7546	28.917	30.1097	24.9672	25.7984	27.5979	23.2034	0.088583	0.125221	26.7775	26.4019	27.5537	15.2465	26.9868	16.1297	19.3751	19.4872	0.024362	27.6565	25.8685	25.8203	20.9708	20.0371	20.2631	Transcription	PREDICTED: transcription factor bHLH145-like [Solanum tuberosum]
RHC12H2G2879.2.gene	4.10903	3.12082	2.88776	2.53273	4.99327	0.057481	2.53083	1.81056	2.81888	0	1.69194	0	0.523664	1.18648	0.636676	0	0	2.32632	0	3.0354	0	3.90035	0	2.54649	--	PREDICTED: purine permease 3-like [Solanum tuberosum]
RHC12H2G2874.2.gene	0.768856	0.574314	0.888201	0.015263	0.87776	0.45372	0.700968	1.1701	1.12649	0.255355	0.026098	0	0.69333	0.294607	0.481839	0.779789	0.800313	0.706546	0.190256	0.957768	0.591106	1.05264	0.507318	0.202583	Function unknown	PREDICTED: secoisolariciresinol dehydrogenase-like [Solanum tuberosum]
RHC12H2G2867.2.gene	10.6767	11.073	9.84331	11.7564	14.3162	12.6401	9.70773	10.2861	10.2788	11.6259	10.3098	10.998	9.21242	11.0097	9.33154	10.3909	11.0365	9.30102	12.0084	12.1608	10.2862	14.3329	13.118	13.5612	Replication, recombination and repair	PREDICTED: DEAD-box ATP-dependent RNA helicase 39 [Solanum lycopersicum]
RHC12H2G2844.2.gene	120.794	74.6871	109.992	0	0.069833	0	73.2262	56.464	93.434	1.29946	10.1783	1.49621	31.4577	1.86608	43.0269	50.5761	75.1135	87.9166	1.38537	2.07436	16.202	1.13855	5.98631	1.07079	Translation, ribosomal structure and biogenesis	PREDICTED: chlorophyll a-b binding protein 5, chloroplastic [Solanum tuberosum]
RHC12H2G2843.2.gene	0.289146	0	0.160513	13.1099	13.0518	11.6956	0.682856	0.678286	0.393334	0.543601	1.46002	1.59052	0.282094	1.58681	0	1.80044	1.87125	1.34975	0.709018	1.20157	1.29893	13.2019	11.4617	10.8963	Function unknown	B-box zinc finger protein 8 [Solanum tuberosum]
RHC12H2G2839.2.gene	13.1837	10.5938	10.7364	20.4131	30.0194	27.7427	4.52759	5.1153	4.94236	7.91814	6.35435	7.33674	3.15007	8.70397	6.14054	7.07189	5.74353	7.41892	6.5056	7.64523	7.0025	9.905	13.4358	3.40636	Function unknown	PREDICTED: acetylajmalan esterase-like [Solanum tuberosum]
RHC12H2G2833.2.gene	199.995	220.568	188.632	130.717	56.7875	115.403	222.665	217.418	223.866	53.3105	52.8068	105.705	208.774	95.2301	159.75	174.927	174.429	186.018	43.377	50.7641	42.252	55.6438	101.47	96.0788	Energy production and conversion	cytochrome b6-f complex iron-sulfur subunit, chloroplastic [Solanum tuberosum]
RHC12H2G2832.2.gene	0.905773	1.14505	0.148887	0.202071	1.28399	2.07096	1.96385	0.2878	1.28667	1.76796	1.45149	2.05391	1.85973	2.04722	2.03993	1.83745	1.2853	1.02199	0.449939	0.171614	1.97344	0.999138	0.484115	0.166871	Function unknown	PREDICTED: uncharacterized protein LOC102599985 isoform X1 [Solanum tuberosum]
RHC12H2G2827.2.gene	6.32908	6.37372	4.43664	7.15819	8.86364	11.8334	6.41228	8.1561	5.90903	9.30749	7.61719	8.07817	6.18607	10.5348	5.69406	6.48027	7.35246	7.83795	8.10398	7.49595	10.3005	8.67422	7.8974	8.19956	Posttranslational modification, protein turnover, chaperones	PREDICTED: calpain-type cysteine protease DEK1 [Solanum tuberosum]
RHC12H2G2825.2.gene	33.7366	34.033	33.5009	26.8504	28.3084	28.6752	47.7056	49.0921	46.0519	40.2678	41.1817	39.1395	38.3745	41.2725	38.8521	34.3625	35.2418	35.0621	43.4956	44.0321	44.6522	26.5992	29.3549	28.0857	Cytoskeleton	tubulin alpha-3 chain [Asparagus officinalis]
RHC12H2G2824.2.gene	4.2532	4.30127	3.46472	5.60187	7.0708	6.18474	2.05141	2.39706	2.2999	3.97864	3.23569	3.56573	2.46468	4.50184	2.9277	4.30138	4.61859	4.22166	4.20685	4.35945	4.1831	6.12711	5.74881	4.42172	Intracellular trafficking, secretion, and vesicular transport	PREDICTED: importin-5-like [Solanum tuberosum]
RHC12H2G2823.2.gene	52.5534	49.3558	52.5393	49.4421	49.1232	50.2002	44.0079	44.8374	46.6347	35.1221	37.5858	37.1627	44.4684	30.7363	43.5159	57.2667	56.8508	54.8889	35.3138	16.6112	35.6829	56.9349	56.3188	60.1853	Function unknown	PREDICTED: serine/arginine-rich SC35-like splicing factor SCL30A isoform X1 [Solanum tuberosum]
RHC12H2G2822.2.gene	14.0777	14.1445	12.6264	21.6728	20.188	17.1794	8.16961	8.22752	7.50537	11.7627	16.8257	13.7653	10.3782	12.8671	10.0485	10.6293	8.11798	8.7571	12.3074	12.986	14.1891	14.2681	13.1166	13.7674	Lipid transport and metabolism	PREDICTED: probable acyl-activating enzyme 18, peroxisomal [Solanum tuberosum]
RHC12H2G2821.2.gene	25.812	27.0589	26.5206	15.0707	11.7096	14.4172	13.9729	16.6971	17.0674	12.7518	14.4474	16.408	14.711	16.5488	16.4558	12.7029	14.5342	12.8374	19.0042	16.2692	16.2328	13.0586	14.1831	13.7782	Function unknown	PREDICTED: spermidine coumaroyl CoA acyltransferase [Solanum pennellii]
RHC12H2G2819.2.gene	0.542343	0.814865	0.670541	3.28805	2.37442	2.89181	1.78446	0.946443	1.39565	3.38841	3.36573	2.78669	1.33425	2.9299	1.38131	1.84189	2.28958	2.74032	2.80914	2.98033	2.86433	3.9753	2.27607	2.88909	Lipid transport and metabolism	PREDICTED: NADH dehydrogenase [ubiquinone] 1 alpha subcomplex subunit 6-like [Nicotiana tabacum]
RHC12H2G2818.2.gene	2.98004	3.86072	3.31974	3.34145	5.3602	5.40322	2.97777	3.2383	3.30739	3.66779	3.46934	2.89182	3.30692	3.74107	2.65874	3.23691	4.35088	3.86515	4.36973	3.92939	3.61661	4.72193	5.20365	4.71593	Replication, recombination and repair	PREDICTED: DEAD-box ATP-dependent RNA helicase 37-like [Capsicum annuum]
RHC12H2G2817.2.gene	0.27908	0.155126	0.257331	0.234821	0.204597	0.132754	0.044684	0.098949	0.048023	0.128796	0.212189	0.127691	0.064348	0.259018	0.17728	0.113446	0.066285	0.142482	0.174897	0.213804	0.114328	0.128501	0.107163	0.174093	Function unknown	PREDICTED: receptor-like protein 12 [Capsicum annuum]
RHC12H2G2816.2.gene	8.30432	8.02634	7.65939	6.41075	5.68534	6.26839	8.84022	8.30922	8.29572	5.03433	4.63612	4.81792	8.71733	7.18266	7.00772	10.8155	9.60881	10.115	7.23019	7.76113	6.47238	5.75254	5.06997	4.7981	Replication, recombination and repair	PREDICTED: DNA (cytosine-5)-methyltransferase CMT3 [Solanum lycopersicum]
RHC12H2G2815.2.gene	3.65384	4.39924	3.66181	6.80995	4.61122	6.07465	5.54641	4.29679	4.63387	6.11738	5.70676	5.37304	3.40816	5.47383	2.76669	6.76265	6.0798	4.77297	5.7054	6.00702	4.61121	5.75901	5.91714	7.06224	Function unknown	PREDICTED: uncharacterized protein LOC104215527 [Nicotiana sylvestris]
RHC12H2G2814.2.gene	1.43317	2.36191	1.2888	5.25788	6.24791	5.01363	2.59832	2.8624	2.46846	4.2193	4.31717	3.96879	1.37108	3.51995	1.19113	4.17718	3.81608	4.1072	5.03387	3.46551	3.75123	5.24669	6.10334	4.38681	Function unknown	PP2A regulatory subunit TAP46 [Capsicum baccatum]
RHC12H2G2813.2.gene	12.528	10.2562	11.601	13.102	13.2503	12.0235	7.66704	8.47833	7.95964	9.92854	10.0589	8.94961	10.392	9.81994	10.1237	10.2327	9.83099	9.12303	10.3505	9.76244	10.0376	11.9258	10.5368	12.6074	Signal transduction mechanisms	PREDICTED: casein kinase I gamma-like [Solanum pennellii]
RHC12H2G2811.2.gene	2.97478	2.83762	3.82129	2.7502	3.36109	3.22674	2.16777	2.15482	2.72794	2.70073	3.10265	2.21974	1.20661	3.07791	0.809353	2.72427	2.41994	3.18302	2.53107	2.39401	3.59599	3.06964	3.05646	2.80136	Posttranslational modification, protein turnover, chaperones	hypothetical protein T459_31476 [Capsicum annuum]
RHC12H2G2810.2.gene	0.605396	0.520486	0.387098	0.976947	0.554163	0.68181	0.325898	0.410844	0.207818	0.743118	0.639956	0.549323	0.4598	0.492039	0.349574	0.829162	0.599702	0.386531	0.704789	0.609288	0.432847	0.548336	0.578291	0.904504	Function unknown	PREDICTED: histone-lysine N-methyltransferase ASHH3-like isoform X2 [Solanum pennellii]
RHC12H2G2802.2.gene	0.942466	0.880448	1.16913	1.01709	1.33121	0.895926	0.411603	0.590966	0.40523	0.692479	0.576565	0.79694	0.390315	0.825876	0.323128	0.924074	0.550772	0.951855	0.916816	0.796659	0.62849	0.729774	0.88416	1.29192	Function unknown	PREDICTED: protein ECERIFERUM 1-like [Solanum tuberosum]
RHC12H2G2799.2.gene	1.87367	1.77837	1.50191	1.81695	1.90251	2.3264	1.66225	1.65624	2.2722	2.37584	1.77737	1.90013	1.19756	1.99849	1.43355	1.71448	1.84422	1.39378	2.15281	2.17766	1.97965	2.02412	1.94088	2.06757	Function unknown	PREDICTED: UPF0061 protein azo1574-like [Solanum tuberosum]
RHC12H2G2798.2.gene	0.322797	0.181975	0.11388	0.222896	0.381119	0.31824	0.361942	0.312974	0.222032	0.431316	0.436705	0.533009	0.130809	0.462491	0.360603	0.381942	0.408689	0.279489	0.09063	0.30194	0.391733	0.487701	0.247083	0.278963	Defense mechanisms	PREDICTED: pleiotropic drug resistance protein 1-like [Solanum tuberosum]
RHC12H2G2797.2.gene	2.79093	2.96575	2.41316	2.84318	2.84747	2.82105	0.834845	0.776558	0.910174	1.38947	1.49297	1.68661	0.757099	0.857493	1.57011	1.62317	1.19733	1.234	2.7799	1.3836	1.59207	1.60073	2.77374	1.97394	Function unknown	PREDICTED: probable 2-oxoglutarate-dependent dioxygenase AOP1 [Solanum tuberosum]
RHC12H2G2796.2.gene	127.515	126.099	123.132	75.2079	65.5192	73.1711	146.012	131.381	156.769	50.6645	52.4033	58.3885	105.263	56.7136	107.088	125.724	115.76	119.237	58.112	64.243	65.209	68.4472	61.9051	72.1236	Translation, ribosomal structure and biogenesis	PREDICTED: 50S ribosomal protein L6, chloroplastic [Solanum tuberosum]
RHC12H2G2794.2.gene	2.15037	2.36889	2.41817	5.99126	6.22151	6.015	3.05469	4.38487	3.81934	4.24202	3.79055	3.85632	1.55668	4.11924	1.63564	4.33689	4.91645	5.21349	4.21957	4.02623	4.45657	7.14757	7.85589	6.81379	Transcription	PREDICTED: transcription factor bHLH128-like [Solanum tuberosum]
RHC12H2G2793.2.gene	1.08903	1.29939	1.43906	1.62261	1.96873	1.63313	1.27527	1.21312	1.60838	0.992638	1.4107	1.27106	0.943017	1.47339	0.677625	1.70546	1.30039	1.38357	1.61713	1.64263	1.03716	1.43989	1.863	1.57951	Carbohydrate transport and metabolism	PREDICTED: probable anion transporter 5 [Solanum lycopersicum]
RHC12H2G2792.2.gene	3.01897	3.2808	2.73225	4.69242	4.21482	4.62802	6.29824	6.49828	5.64215	7.38973	5.43829	5.9216	2.46965	6.66927	2.99799	11.0812	11.0086	11.8803	5.25117	6.40177	6.51864	8.97601	8.00386	8.14113	Function unknown	PREDICTED: uncharacterized protein LOC102603152 [Solanum tuberosum]
RHC12H2G2784.2.gene	0.910568	1.01957	1.21647	1.28616	1.00924	1.535	1.09565	1.35092	0.73447	1.10139	1.47055	1.20884	0.44776	1.20771	0.796434	1.10184	0.792762	0.743241	1.25245	1.08313	0.843779	0.881025	1.0928	1.19718	Translation, ribosomal structure and biogenesis	PREDICTED: hemK methyltransferase family member 2 [Solanum tuberosum]
RHC12H2G2783.2.gene	60.6016	61.3843	71.8931	315.362	329.807	262.511	101.314	104.692	103.268	292.845	370.038	263.218	79.4765	260.028	67.3214	175.541	156.001	159.649	266.139	285.378	276.606	201.193	230.617	210.177	Function unknown	PREDICTED: zinc finger A20 and AN1 domain-containing stress-associated protein 5-like [Solanum pennellii]
RHC12H2G2782.2.gene	3.19206	3.19338	3.41043	7.27514	7.70444	8.42463	4.84411	5.75389	5.15371	6.60317	7.48598	6.85126	3.30572	6.15172	3.06972	8.39222	8.37487	7.11355	6.24334	7.68597	6.41757	9.19835	8.24202	9.7927	Function unknown	PREDICTED: protein slowmo homolog [Solanum tuberosum]
RHC12H2G2781.2.gene	6.64883	6.73811	6.96117	8.42356	9.82791	8.96545	7.81278	8.12871	7.39127	10.0915	8.4433	9.28592	5.99893	8.88085	5.95227	7.6929	8.53477	8.85299	10.6564	9.30892	8.29797	9.1425	8.60877	7.99789	Function unknown	PREDICTED: uncharacterized protein LOC102578195 [Solanum tuberosum]
RHC12H2G2777.2.gene	1.82822	1.3522	1.42183	1.618	2.06128	1.77967	1.65891	1.6857	1.59913	1.95649	1.8818	1.84463	1.26833	2.01213	1.49915	1.88591	2.39932	1.7354	2.14663	1.9534	1.50373	2.03238	2.12201	2.34369	Function unknown	PREDICTED: U-box domain-containing protein 4-like isoform X1 [Solanum tuberosum]
RHC12H2G2774.2.gene	1.22822	1.44406	1.31845	0.801405	0.351994	0.762822	2.94607	2.30546	3.03187	2.30757	2.39609	2.55049	1.33606	2.54036	1.73606	2.51978	2.86954	2.13567	3.10016	2.75084	2.29602	1.73829	1.87264	2.06839	Function unknown	(E,E)-geranyllinalool synthase [Solanum tuberosum]
RHC12H2G2766.2.gene	2.18742	2.62965	3.54003	1.67319	1.30967	1.67578	5.96514	5.59769	7.12818	4.60681	4.52696	5.00309	3.81372	4.49048	3.88123	6.2538	4.814	6.66979	4.89731	4.9719	4.97842	3.53443	4.36669	3.60331	Function unknown	SnRK1 beta subunit [Solanum berthaultii]
RHC12H2G2765.2.gene	1.16193	1.28735	1.73111	3.98324	2.45508	2.80053	5.1859	4.94114	2.85181	2.5053	3.23263	2.44451	2.47925	2.78808	1.51882	3.47264	3.5274	2.64637	3.22282	2.44138	3.12555	3.1128	4.13614	2.24598	Function unknown	PREDICTED: uncharacterized protein LOC102591675 [Solanum tuberosum]
RHC12H2G2763.2.gene	5.54847	4.62611	4.66673	7.27761	7.28357	6.99305	8.68481	8.95425	7.08	6.46804	7.57179	5.83207	5.81673	6.92263	4.54406	9.40603	8.95526	7.90205	6.33927	5.70727	5.79819	10.1311	12.1362	9.96013	Function unknown	PREDICTED: uncharacterized protein LOC102592015 [Solanum tuberosum]
RHC12H2G2762.2.gene	118.363	112.025	116.927	54.0238	50.1457	54.0687	110.09	106.847	117.962	98.1163	100.362	100.981	96.9496	103.518	96.8783	71.0208	75.6205	77.3902	79.7851	111.294	101.588	34.1051	36.3701	39.2405	Function unknown	PREDICTED: uncharacterized protein LOC102593023 isoform X2 [Solanum tuberosum]
RHC12H2G2761.2.gene	8.69374	8.55568	7.95325	9.38358	9.58849	10.4071	7.78466	8.58188	7.66247	11.1995	10.5109	11.517	6.73861	11.3297	6.25483	8.55345	9.10661	8.2823	11.2917	11.0921	10.8677	10.2171	10.0558	11.5254	Replication, recombination and repair	PREDICTED: protein CHROMATIN REMODELING 5 [Solanum tuberosum]
RHC12H2G2760.2.gene	2.41681	1.68343	2.33823	0.813144	0.930813	0.930842	1.2906	1.76442	1.83639	1.21388	1.44416	1.13337	1.8536	1.09468	2.27838	1.01887	1.10344	0.82877	1.42292	1.745	1.87705	0.588686	1.02665	0.552191	Transcription	PREDICTED: scarecrow-like protein 3 [Solanum tuberosum]
RHC12H2G2759.2.gene	3.04737	2.94324	2.42873	4.246	3.88388	4.18483	1.79495	1.91736	1.6905	3.271	3.72117	3.25832	1.50366	3.58391	1.37407	2.6949	2.56259	2.01913	4.43804	3.95734	3.60164	3.71228	3.70712	3.85333	Function unknown	PREDICTED: protein SDA1 homolog [Solanum tuberosum]
RHC12H2G2758.2.gene	1.74064	1.12652	0.836151	2.14015	1.35228	1.43988	1.06902	1.44811	1.07986	1.31316	1.20142	1.48968	0.415098	1.34325	0.794719	1.3675	1.02337	0.813644	1.20786	1.15468	1.18184	0.985085	1.17596	1.74669	Function unknown	PREDICTED: DAR GTPase 2, mitochondrial [Solanum tuberosum]
RHC12H2G2757.2.gene	0.576151	0.679892	0.490836	1.02938	1.12239	1.26964	0.315763	0.547153	0.236816	0.68892	0.489142	0.530638	0.3328	0.778083	0.309272	0.621791	0.396461	0.714551	0.780874	0.756148	0.768331	0.743467	0.638488	0.739043	Function unknown	PREDICTED: pentatricopeptide repeat-containing protein At4g14170-like [Solanum tuberosum]
RHC12H2G2756.2.gene	0.753577	0.563375	0.865555	0.781464	0.764215	0.990823	0.55907	0.511618	0.547777	0.839878	0.430452	0.653458	0.20441	0.515955	0.197686	0.624112	0.515438	0.74046	0.79176	0.849966	0.736483	0.620369	0.742907	1.04241	Function unknown	PREDICTED: pentatricopeptide repeat-containing protein At5g12100, mitochondrial [Solanum tuberosum]
RHC12H2G2755.2.gene	15.4235	14.8542	13.1661	14.7145	15.0878	13.8538	12.3706	11.3888	9.36856	11.6894	15.2546	13.8436	9.44573	12.73	9.17025	11.7427	11.0924	10.3308	13.6243	14.7812	13.1768	12.6352	14.338	15.0524	Signal transduction mechanisms	PREDICTED: probable serine/threonine-protein kinase At5g41260 [Solanum tuberosum]
RHC12H2G2754.2.gene	19.0073	25.3897	25.4559	27.6137	23.8412	20.8855	26.3757	16.8946	17.9124	18.9993	16.6312	17.7362	17.6311	17.3817	16.3744	25.5988	19.0881	17.8162	21.6692	21.0207	18.8226	24.9518	22.8672	22.7036	Intracellular trafficking, secretion, and vesicular transport	PREDICTED: signal recognition particle 9 kDa protein [Solanum lycopersicum]
RHC12H2G2753.2.gene	2.60125	2.27363	2.51879	2.72663	2.70711	3.01652	0.323391	0.421721	0.354544	0.921277	1.02074	0.976886	0.795295	0.580179	0.588018	0.923818	1.08454	1.15921	0.712127	0.820985	1.18945	1.45358	2.07766	1.68722	Function unknown	PREDICTED: protein CLT1, chloroplastic-like [Solanum tuberosum]
RHC12H2G2751.2.gene	4.34016	4.57319	5.3515	10.3794	9.83165	8.36128	10.1258	9.20594	9.14684	7.58907	8.8656	7.44493	4.60587	11.4133	5.23353	12.3385	11.5147	13.1795	12.3367	12.4824	11.7702	16.2835	16.9244	15.5079	Signal transduction mechanisms	PREDICTED: calcium-dependent protein kinase 17-like [Solanum lycopersicum]
RHC12H2G2750.2.gene	2.12518	1.65354	1.6816	1.85217	1.98821	1.72729	2.28263	2.37365	2.70646	2.2216	2.60283	2.69938	1.77974	3.11394	2.31671	1.93241	2.18463	1.75402	3.8158	2.19096	2.91081	1.87839	2.15824	2.46297	Transcription	PREDICTED: uncharacterized protein LOC102600158 [Solanum tuberosum]
RHC12H2G2749.2.gene	12.0157	10.836	11.6832	6.34614	5.81964	6.56707	8.40465	10.1909	8.86476	8.67633	8.46961	8.90191	6.31276	9.95571	6.56666	6.23049	7.31468	6.94774	10.1886	9.1802	9.21288	6.58552	5.34914	5.88851	--	PREDICTED: uncharacterized protein LOC102600493 [Solanum tuberosum]
RHC12H2G2748.2.gene	5.68942	4.83821	7.00505	0.590289	0.814338	0.696384	3.89858	4.32586	5.14637	5.77234	6.04067	6.28572	1.14928	9.94214	1.59993	4.44282	4.07533	3.33171	8.52422	8.79702	10.536	2.0705	1.63662	1.91018	Function unknown	PREDICTED: uncharacterized protein LOC102600818 [Solanum tuberosum]
RHC12H2G2747.2.gene	2.05639	2.36156	2.19773	0.277247	0.360396	0.146577	1.8191	1.8673	1.63434	2.27329	2.40635	2.01194	0.467209	3.86932	0.653885	1.8577	1.26263	1.60601	3.52508	4.08773	3.58431	0.669477	0.651892	0.628519	Function unknown	PREDICTED: uncharacterized protein LOC102600818 [Solanum tuberosum]
RHC12H2G2746.2.gene	0.478682	0.662292	0.321427	0.173566	0.311455	0.109559	0.194184	0.123982	0.123795	0.203839	0.282952	0.210296	0.189404	0.123834	0.176439	0.022423	0.094185	0.104601	0.300851	0.097153	0.304749	0.055605	0.05662	0.139943	Signal transduction mechanisms	PREDICTED: histidine kinase CKI1 [Solanum tuberosum]
RHC12H2G2745.2.gene	4.38356	4.7679	4.99695	3.07783	2.51974	3.93799	2.63512	4.11304	3.12785	3.41973	1.79194	1.51154	2.96664	3.7535	2.2287	2.47006	3.62582	2.67559	3.10592	3.13059	2.30304	3.8434	2.81779	1.77908	Coenzyme transport and metabolism	PREDICTED: lipoyl synthase, chloroplastic [Solanum tuberosum]
RHC12H2G2742.2.gene	1.17017	1.41134	1.60072	2.00296	1.94923	2.50258	0.920947	1.87721	1.19957	1.48303	1.62525	1.33945	1.04503	1.76745	1.19657	1.47708	2.23615	1.68953	2.34299	1.8314	2.01371	1.95406	1.46471	1.61034	Posttranslational modification, protein turnover, chaperones	PREDICTED: glucosidase 2 subunit beta [Solanum pennellii]
RHC12H2G2741.2.gene	7.81654	5.85002	7.6862	2.56317	2.22749	3.62879	8.34717	5.39659	7.93843	3.66753	3.26736	1.76251	7.69177	2.06346	7.06125	6.43375	5.55226	7.31823	1.92438	2.41444	1.92447	5.4463	5.66371	4.2854	Function unknown	PREDICTED: photosystem II 5 kDa protein, chloroplastic-like [Solanum lycopersicum]
RHC12H2G2740.2.gene	0.458298	0.951958	0.610223	1.30813	0.775449	1.18964	0.890421	0.570049	0.569621	0.970095	0.865399	1.52382	0.3508	1.40997	0.497442	0.730428	0.791325	0.789204	0.948209	1.96943	1.44608	0.712581	1.22643	1.0482	Function unknown	PREDICTED: mitochondrial thiamine pyrophosphate carrier-like [Solanum tuberosum]
RHC12H2G2737.2.gene	1.49997	1.08418	1.45842	0.74213	0.489805	0.423301	0.731005	0.514698	0.512737	1.47398	0.773806	1.43519	0.39373	1.6525	0.404684	0.791016	0.518826	0.560378	2.62015	2.2631	1.89534	0.365103	0.456375	0.406498	Signal transduction mechanisms	PREDICTED: probable protein phosphatase 2C 40 [Solanum tuberosum]
RHC12H2G2736.2.gene	2.2067	2.88504	2.94074	1.18808	0.69133	0.815112	1.4361	0.81864	2.70276	0.773997	1.20746	0.975444	0.921267	0.704679	1.03211	0.861245	1.24544	2.27524	0.871068	0.388446	0.400851	1.24556	1.0957	1.16475	Function unknown	PREDICTED: uncharacterized protein LOC107005791 [Solanum pennellii]
RHC12H2G2735.2.gene	0.332602	0.25323	0.247741	0.190234	0.182994	0.353861	0.381577	0.114529	0.239718	0.266718	0.472553	0.113988	0	0.37396	0.056893	0.096518	0.325525	0.173777	0.779306	0.774254	0.455676	0.759035	0.150392	0.371172	Function unknown	PREDICTED: WAT1-related protein At3g30340-like [Solanum pennellii]
RHC12H2G2734.2.gene	24.8791	24.4912	30.1778	25.2344	23.3874	20.1011	19.909	19.1595	20.8431	13.091	21.7638	18.7891	20.0352	14.9464	17.9309	26.4664	21.072	17.8377	15.9356	18.782	20.0936	24.0067	28.3475	21.8858	Function unknown	hypothetical protein A4A49_52853 [Nicotiana attenuata]
RHC12H2G2733.2.gene	11.6998	11.3927	10.3651	11.0701	10.7817	11.0113	6.98617	6.94478	6.70271	8.77394	7.76247	8.85767	8.15784	9.84256	6.53268	6.79301	8.32165	7.2182	9.86124	9.00258	9.0423	9.81688	8.20162	9.44585	Transcription	PREDICTED: probable histone-arginine methyltransferase 1.3 [Solanum tuberosum]
RHC12H2G2732.2.gene	1.16349	0.797546	1.58098	1.19976	1.19654	1.0927	1.02011	0.752659	0.865736	1.27722	1.11324	1.31252	0.457541	1.24417	0.5911	0.985789	1.21277	1.13577	0.949346	1.48936	0.923669	1.31766	1.29235	1.02563	Function unknown	PREDICTED: F-box/kelch-repeat protein At3g06240-like [Solanum tuberosum]
RHC12H2G2731.2.gene	3.21786	3.38569	3.16892	2.04085	2.21856	1.86414	1.64559	2.00564	1.98246	1.3465	1.52609	1.53121	1.71884	1.34033	1.63304	2.56669	2.77422	2.41646	2.15009	1.8137	1.43512	3.17862	2.89314	2.37087	Cytoskeleton	PREDICTED: kinesin-13A-like [Solanum tuberosum]
RHC12H2G2730.2.gene	5.90568	5.99409	6.25365	8.19704	8.71936	7.40911	4.04666	5.70501	4.88926	6.85756	7.33279	4.96785	5.03787	6.48942	5.26478	6.76016	5.56261	5.80149	8.56769	5.99836	6.72029	8.55851	6.92113	6.99796	Posttranslational modification, protein turnover, chaperones	PREDICTED: ubiquitin-like-specific protease ESD4 [Solanum tuberosum]
RHC12H2G2728.2.gene	2.10769	2.17947	1.52074	1.20672	1.23301	1.41341	1.05057	1.13954	1.38611	0.888993	0.693838	0.857011	1.03728	1.18226	1.07543	1.87553	1.83521	1.9532	0.950656	1.05394	0.763514	1.04053	0.954392	1.21271	Function unknown	PREDICTED: condensin-2 complex subunit D3 [Solanum tuberosum]
RHC12H2G2727.2.gene	14.3667	13.9889	13.1558	10.0565	11.7677	12.4893	9.21496	9.03757	9.29533	11.6577	9.9888	12.2076	6.71746	12.3559	7.62068	10.2599	10.026	10.8234	12.1007	11.8582	12.591	11.936	13.1208	13.098	Function unknown	PREDICTED: chaperone protein dnaJ 49 [Solanum pennellii]
RHC12H2G2726.2.gene	5.31386	6.60708	8.16005	5.80407	3.9007	3.94348	3.14729	3.76468	3.02321	4.21787	4.11528	4.07651	4.80066	5.7158	5.93424	4.07687	5.6518	4.29588	8.32122	6.52796	6.79275	4.05975	3.70376	3.45523	--	PREDICTED: uncharacterized protein LOC107061032 [Solanum tuberosum]
RHC12H2G2725.2.gene	30.0084	26.3157	32.6789	29.1273	33.8927	33.1357	26.2693	21.4591	25.549	23.7446	27.7115	28.6097	22.4388	26.0945	21.8298	27.606	31.5559	28.9928	26.5824	26.1577	27.2069	32.2689	30.5832	35.2325	Function unknown	PREDICTED: protein FAM32A isoform X1 [Solanum pennellii]
RHC12H2G2722.2.gene	13.6734	14.3833	14.7895	17.9481	17.6888	21.2093	16.0165	14.8536	13.6291	16.7525	14.768	13.2818	13.583	17.0531	11.4106	13.7426	16.4646	15.8879	17.0455	16.1879	17.5997	16.4864	18.9893	15.7811	Translation, ribosomal structure and biogenesis	PREDICTED: eukaryotic translation initiation factor 2 subunit gamma-like [Solanum tuberosum]
RHC12H2G2721.2.gene	1.02776	1.09412	0.832971	3.04832	2.48563	2.6111	1.71296	1.83731	1.28695	1.64155	1.44985	1.59177	0.605	1.5265	0.48271	1.48114	1.48708	1.23331	1.72215	1.27019	0.999362	1.29367	1.65672	1.59596	Function unknown	PREDICTED: uncharacterized protein DDB_G0271670-like [Solanum lycopersicum]
RHC12H2G2720.2.gene	21.6018	22.0495	21.7733	25.9526	24.2362	28.5928	22.5423	24.3624	22.9473	32.7875	30.9157	30.7987	16.6033	50.1196	17.3168	30.9381	32.5364	33.6433	43.2041	47.7114	43.1306	38.2583	33.8818	38.1319	Lipid transport and metabolism	PREDICTED: glyoxysomal fatty acid beta-oxidation multifunctional protein MFP-a-like [Solanum tuberosum]
RHC12H2G2719.2.gene	29.3572	29.843	28.4999	31.9328	28.4724	29.1636	23.0878	21.2095	21.6692	33.4849	39.1685	35.6252	15.0861	32.04	16.1009	27.3606	24.1369	23.4031	30.6088	28.5835	30.684	23.5845	24.369	24.6657	Function unknown	PREDICTED: bifunctional epoxide hydrolase 2-like [Solanum tuberosum]
RHC12H2G2717.2.gene	4.89412	5.4235	5.35835	4.15626	5.28387	4.5068	3.71664	3.86599	3.70666	5.20979	3.85076	4.36784	2.8555	4.66108	3.38421	4.80736	4.83244	4.61073	4.41995	4.5209	4.00169	5.45744	4.89172	4.28591	Function unknown	PREDICTED: condensin-2 complex subunit H2 [Solanum tuberosum]
RHC12H2G2715.2.gene	6.10643	8.09483	8.36418	16.514	13.7294	15.2095	4.16662	4.76351	4.94419	7.82238	8.33479	7.03782	5.04214	6.31938	5.24956	8.56545	7.54521	8.24067	7.73376	5.21292	7.26987	18.413	17.7747	16.1899	Function unknown	PREDICTED: uncharacterized protein LOC102580514 [Solanum tuberosum]
RHC12H2G2714.2.gene	7.57707	5.69214	8.06015	12.7239	13.0424	10.7024	20.9856	17.7614	17.9786	16.5603	17.9825	14.0221	14.9924	16.14	13.7051	18.9464	13.6765	14.6412	17.7703	17.4344	16.743	10.3823	12.8755	12.0005	Function unknown	protein dehydration-induced 19 -like 4 [Nicotiana attenuata]
RHC12H2G2713.2.gene	0.779818	0.852618	0.770909	2.77183	2.5501	2.69483	1.78246	1.2861	0.832407	2.31526	2.30837	2.41697	0.561632	2.45077	0.947345	1.24918	2.00573	1.05777	2.99512	1.7338	2.99936	1.2409	1.53958	1.5879	Transcription	PREDICTED: two-component response regulator ARR2 [Solanum tuberosum]
RHC12H2G2712.2.gene	19.847	17.234	20.5622	15.8568	18.3129	18.4158	19.8002	18.6928	20.8312	18.2781	22.058	24.3652	8.52654	18.878	10.1705	12.397	10.1644	11.2438	24.2255	23.4534	21.9865	14.1176	13.3533	14.3162	Transcription	PREDICTED: GATA transcription factor 16-like [Solanum pennellii]
RHC12H2G2711.2.gene	2.93896	2.78895	4.19801	3.70993	3.51632	3.1908	6.60006	7.27186	7.00262	9.15426	10.6297	9.34919	5.0716	8.05108	4.89672	6.28814	6.91127	6.99935	10.3669	9.2513	8.82793	4.37833	3.61245	4.09723	--	PREDICTED: acetate/butyrate--CoA ligase AAE7, peroxisomal-like [Solanum tuberosum]
RHC12H2G2710.2.gene	72.8904	72.6726	84.5243	57.8285	53.2185	55.6555	61.9388	52.2688	59.8452	43.2159	52.2154	41.7469	57.7596	45.6771	48.7333	48.7871	38.8532	44.4014	52.1291	62.6939	55.7645	42.9485	49.6849	48.9175	Function unknown	PREDICTED: calmodulin-binding transcription activator 6-like isoform X2 [Solanum tuberosum]
RHC12H2G2709.2.gene	88.9564	85.6072	91.4432	60.994	59.3569	63.0436	72.7593	71.7309	73.7299	60.0092	57.5592	66.2053	95.5565	64.6285	97.4434	48.8078	44.739	48.0566	68.0548	68.2563	66.277	65.6521	63.4024	62.3102	Posttranslational modification, protein turnover, chaperones	PREDICTED: ubiquitin-conjugating enzyme E2 32 [Solanum tuberosum]
RHC12H2G2708.2.gene	0.487355	0.391013	0.29543	0.410087	0.30842	0.437392	0.320387	0.140341	0.469458	0.471544	0.053242	0.124104	0.142138	0.179654	0.102281	0.221881	0.150992	0.218818	0.253851	0.090409	0.138816	0.210973	0.418039	0.405652	Function unknown	PREDICTED: UPF0481 protein At3g47200-like [Solanum tuberosum]
RHC12H2G2707.2.gene	18.184	20.2957	17.0842	46.0935	44.6263	42.8652	15.8728	15.3083	16.5682	11.1376	11.5604	11.5324	16.8328	12.4787	15.6902	38.4833	39.5095	40.7818	10.1094	11.577	11.4679	41.8449	40.5978	40.3449	Energy production and conversion	PREDICTED: aldehyde dehydrogenase 22A1 [Solanum tuberosum]
RHC12H2G2706.2.gene	0.476781	0.471119	0.403309	3.40286	3.84259	2.93661	0.894659	0.781257	0.753338	2.03109	1.56871	1.82577	0.40409	1.947	0.284846	0.884851	0.950017	0.837813	2.10865	1.69088	1.21337	2.75492	2.39442	2.07979	RNA processing and modification	PREDICTED: FIP1[III]-like protein [Solanum tuberosum]
RHC12H2G2705.2.gene	6.31855	5.81938	4.81005	12.1406	9.59645	12.2126	7.28487	5.00467	6.09656	6.53048	8.42313	6.1608	3.12355	7.03974	3.65875	7.13043	9.10164	5.19717	5.63143	5.52052	6.33932	7.92294	9.2987	7.88435	Energy production and conversion	PREDICTED: uncharacterized protein LOC107007135 [Solanum pennellii]
RHC12H2G2704.2.gene	34.4206	34.7091	32.8878	38.7632	38.6486	40.1517	16.9324	17.8843	18.6724	14.859	12.8262	14.988	25.4055	15.9781	19.1405	22.5449	32.3841	27.6997	21.0448	16.2597	16.5544	31.9007	33.6048	35.1506	Energy production and conversion	PREDICTED: ATP-citrate synthase beta chain protein 2 [Solanum tuberosum]
RHC12H2G2703.2.gene	10.2107	9.65375	9.19815	15.8579	17.4988	17.1581	8.9914	16.1814	7.86757	12.1718	12.2156	18.3821	6.20894	17.948	7.72545	13.6322	15.7382	15.7348	16.8411	18.91	17.8356	17.3759	14.2725	18.1197	Signal transduction mechanisms	PREDICTED: probable serine/threonine-protein kinase DDB_G0272254 isoform X1 [Solanum tuberosum]
RHC12H2G2702.2.gene	54.2107	51.4537	63.1578	60.5049	51.3405	52.0635	52.252	44.5635	43.4265	39.1695	45.5837	40.4043	46.3998	40.9342	39.2313	47.9376	45.1782	41.6674	45.0648	42.1266	46.3418	47.7513	56.9884	52.3393	Function unknown	PREDICTED: huntingtin-interacting protein K [Solanum tuberosum]
RHC12H2G2698.2.gene	5.91345	5.9208	5.10065	18.4306	19.8305	17.2192	21.6893	18.5693	19.7111	29.8214	33.3328	31.9432	14.3416	22.6644	15.5237	18.5387	17.6651	15.0548	20.9546	25.152	22.2142	19.3774	20.6064	21.6031	Carbohydrate transport and metabolism	putative invertase inhibitor precursor [Solanum tuberosum]
RHC12H2G2697.2.gene	4.61868	4.64139	4.78589	5.69182	5.44563	5.34643	6.03576	6.80471	5.43969	5.5967	5.71121	5.60691	3.52985	6.37529	4.00358	5.33568	6.09811	6.41671	5.23579	4.93469	6.29535	6.24241	5.35503	5.89644	RNA processing and modification	PREDICTED: nuclear poly(A) polymerase 3-like [Solanum tuberosum]
RHC12H2G2696.2.gene	5.7401	7.04729	6.11537	10.4718	9.886	9.6061	8.8509	7.87267	8.38297	7.85829	8.77161	8.1139	4.63107	12.0017	4.69373	8.54421	9.5932	10.5298	11.9055	12.0289	10.4559	9.5531	9.31258	9.4529	Amino acid transport and metabolism	PREDICTED: serine carboxypeptidase-like 33 [Solanum tuberosum]
RHC12H2G2694.2.gene	3.23943	3.46374	3.97661	5.2699	5.29013	5.7072	3.93964	3.95227	3.53465	4.18243	4.16339	4.37285	2.9523	6.00601	2.53077	4.22451	3.79526	4.56529	4.7961	4.91023	5.683	4.29261	4.39519	4.78997	Translation, ribosomal structure and biogenesis	PREDICTED: 30S ribosomal protein S1, chloroplastic-like [Solanum tuberosum]
RHC12H2G2693.2.gene	11.1543	10.5312	10.5038	6.24071	6.23681	7.25697	5.35411	5.17542	5.2753	6.85302	5.48165	5.49962	6.13944	7.52976	6.66702	6.34765	7.99824	7.35151	8.13714	7.20089	7.17989	7.15438	5.77684	8.2123	Energy production and conversion	PREDICTED: dihydrolipoyl dehydrogenase, mitochondrial-like [Solanum pennellii]
RHC12H2G2692.2.gene	17.192	17.4858	14.6581	14.7333	15.8336	15.8299	20.7385	20.6957	17.7352	19.2894	17.9138	19.0443	25.1921	21.9434	26.0643	17.0209	18.7557	18.1149	21.248	20.2631	22.2261	14.6122	14.3537	15.0962	Function unknown	PREDICTED: uncharacterized protein LOC102589124 isoform X1 [Solanum tuberosum]
RHC12H2G2691.2.gene	38.9953	41.1392	41.1179	38.7859	40.6041	39.7052	41.3526	40.6755	35.0908	48.508	51.7135	43.7944	34.6359	44.4176	36.7408	48.4975	45.2809	46.3333	46.8687	48.5607	45.2946	43.1862	46.8281	44.2424	Function unknown	PREDICTED: ADP-ribosylation factor 2 [Solanum lycopersicum]
RHC12H2G2689.2.gene	22.8539	25.3735	25.036	38.0246	33.531	36.0789	23.7646	25.6006	22.1695	42.5487	42.9692	40.0744	21.1319	39.143	22.4534	30.1384	29.2327	28.8943	43.7083	40.2258	42.7351	33.5412	33.3304	37.3936	Function unknown	PREDICTED: ADP-ribosylation factor 1 isoform X3 [Tarenaya hassleriana]
RHC12H2G2686.2.gene	196.344	299.595	222.521	227.111	194.238	207.329	198.162	175.817	185.42	172.715	234.405	177.283	189.408	189.367	153.505	185.462	149.043	160.146	197.654	215.187	197.347	170.296	186.703	161.608	Translation, ribosomal structure and biogenesis	hypothetical protein POPTR_002G190000v3 [Populus trichocarpa]
RHC12H2G2685.2.gene	3.91488	3.95672	3.62768	4.33707	3.6691	3.68159	3.06961	3.29659	2.7852	3.88816	3.46893	3.57961	2.95824	3.909	2.55219	3.30474	3.19037	3.61445	3.72513	3.42	3.96232	4.03489	4.17092	3.57763	Function unknown	PREDICTED: protein GFS12 isoform X1 [Solanum tuberosum]
RHC12H2G2684.2.gene	125.119	128.945	125.186	120.55	113.535	114.163	73.2538	76.9877	73.6925	83.7301	87.5363	79.1514	102.313	75.4774	92.3328	91.4181	96.2057	87.6863	65.4645	71.8058	72.2136	77.6667	81.1304	83.3895	Coenzyme transport and metabolism	PREDICTED: S-adenosylmethionine synthase 2 [Solanum tuberosum]
RHC12H2G2683.2.gene	6.27574	6.75442	5.93894	5.88201	6.43816	6.37357	7.62459	6.74013	5.94387	5.96216	5.39629	7.01525	5.5552	7.83441	4.1081	4.693	6.0133	5.61459	6.33143	6.78517	6.70876	4.39941	4.78122	5.48487	Function unknown	PREDICTED: pentatricopeptide repeat-containing protein At3g06430, chloroplastic-like [Solanum lycopersicum]
RHC12H2G2682.2.gene	16.8679	16.8899	17.5533	13.1996	13.2435	12.6142	11.8567	13.635	11.8946	12.0939	11.218	11.0757	10.5617	12.0969	10.3831	12.0071	13.0758	14.0206	12.1615	12.852	13.4733	13.5088	14.4318	15.0064	Signal transduction mechanisms	PREDICTED: pto-interacting protein 1 [Solanum tuberosum]
RHC12H2G2681.2.gene	23.8093	22.4941	23.6865	23.9422	23.7889	22.313	17.6092	16.815	14.242	18.3394	19.4616	17.1617	13.9283	17.1111	15.2475	18.3863	17.6682	17.0137	21.4275	19.6597	17.4741	21.0132	19.828	20.7324	Signal transduction mechanisms	PREDICTED: probable receptor-like protein kinase At5g18500 [Solanum lycopersicum]
RHC12H2G2680.2.gene	29.6307	27.3351	31.2278	26.2238	25.2769	23.2069	31.6535	32.8153	32.7884	30.1124	32.3953	29.7699	27.0423	29.7547	25.4089	32.0149	30.8857	29.6726	30.9307	27.4877	29.4009	27.2798	28.305	24.3757	Function unknown	PREDICTED: novel plant SNARE 13-like [Solanum tuberosum]
RHC12H2G2679.2.gene	260.203	282.086	315.224	474.857	361.133	399.609	320.193	275.784	255.505	352.308	535.734	375.9	275.191	378.687	236.407	382.651	259.471	262.725	421.296	431.213	431.947	354.642	410.171	345.038	Translation, ribosomal structure and biogenesis	hypothetical protein POPTR_002G190000v3 [Populus trichocarpa]
RHC12H2G2678.2.gene	0.372082	0.471714	0.120439	0.852949	0.695075	0.585167	0	0.130543	0	0.671786	0.375329	0.387303	0.043299	0.3656	0.344676	0.302093	0.463927	0.337347	0.397859	0.534263	0.098025	0.301816	0.250423	0.78559	Signal transduction mechanisms	PREDICTED: pyruvate dehydrogenase (acetyl-transferring) kinase, mitochondrial-like [Solanum tuberosum]
RHC12H2G2677.2.gene	25.74	25.2277	25.5535	12.1148	12.8226	12.1148	16.7711	18.9522	21.1308	22.8272	21.39	24.5807	12.4972	22.2362	11.4197	13.6042	14.5122	14.4577	18.7235	21.7199	22.6541	12.4991	11.6343	13.1139	--	PREDICTED: probable GTP diphosphokinase CRSH, chloroplastic [Solanum lycopersicum]
RHC12H2G2676.2.gene	4.09167	3.79873	3.95605	5.46908	4.98395	5.17445	4.72777	4.20463	4.52014	6.10016	7.18351	5.79272	4.8978	5.87412	5.0276	8.21796	9.08401	7.13638	6.83952	5.62101	7.18631	8.08813	7.40181	9.47624	Signal transduction mechanisms	PREDICTED: CBL-interacting serine/threonine-protein kinase 1 [Solanum pennellii]
RHC12H2G2671.2.gene	326.107	339.738	345.526	175.838	177.232	184.809	386.082	337.825	402.593	152.103	149.898	128.603	293.835	162.421	239.718	328.656	304.178	320.619	154.947	184.824	169.697	190.329	192.799	196.6	Translation, ribosomal structure and biogenesis	PREDICTED: 50S ribosomal protein L18, chloroplastic [Solanum tuberosum]
RHC12H2G2669.2.gene	2.49572	2.98717	3.14177	7.61042	7.81432	8.48547	3.39084	3.67138	3.02975	5.76195	6.04571	5.64665	2.49097	5.38991	1.95279	5.35632	5.39498	5.76197	5.1535	6.09179	5.45275	6.99015	7.95402	7.1875	Replication, recombination and repair	PREDICTED: SWI/SNF-related matrix-associated actin-dependent regulator of chromatin subfamily A-like protein 1 isoform X1 [Solanum tuberosum]
RHC12H2G2668.2.gene	109.399	109.155	105.113	142.628	115.003	101.5	84.7051	84.0944	81.4019	82.9393	85.9893	90.9616	118.622	119.703	80.9857	112.632	121.795	118.105	118.434	78.7299	134.056	100.887	95.9873	140.683	Function unknown	PREDICTED: uncharacterized protein LOC102596770 [Solanum tuberosum]
RHC12H2G2666.2.gene	23.8017	24.8167	22.2499	20.2525	23.3362	23.5444	18.4778	19.7999	18.8689	18.233	17.1051	18.8082	19.3166	17.4751	19.5078	13.9971	15.5471	14.4233	17.1915	17.9096	16.3948	18.4756	18.1914	16.9577	Function unknown	PREDICTED: 5&apos;-nucleotidase domain-containing protein 4 isoform X1 [Solanum tuberosum]
RHC12H2G2665.2.gene	23.6099	24.4878	22.5963	28.979	26.2312	25.0188	27.2391	28.4845	27.25	26.1846	25.1132	24.6572	27.7844	27.5812	29.3346	32.5826	35.7369	38.0468	26.4506	25.8448	24.4929	34.8593	35.6444	31.7011	Signal transduction mechanisms	PREDICTED: PTI1-like tyrosine-protein kinase 1 isoform X1 [Solanum lycopersicum]
RHC12H2G2664.2.gene	15.7534	16.9111	18.1467	50.2313	48.3392	54.3689	280.147	294.249	300.249	121.379	116.312	124.469	344.578	126.949	358.988	162.75	190.799	179.376	142.889	125.718	116.158	54.8661	52.0351	54.3287	Carbohydrate transport and metabolism	PREDICTED: chitinase-like protein 1 [Solanum tuberosum]
RHC12H2G2659.2.gene	0.356442	0.546168	0.397892	0.912568	1.52865	1.1376	0.746753	0.989578	0.997668	1.18633	0.907407	0.974989	0.549977	0.692986	0.543853	1.06368	1.08653	1.01913	0.953736	0.676422	0.787841	0.929366	0.744769	0.797283	Function unknown	PREDICTED: extensin-2-like [Solanum lycopersicum]
RHC12H2G2658.2.gene	1.21006	1.14951	1.22654	0.672796	1.06322	1.46492	1.3939	1.91364	1.5733	2.16349	1.39831	1.59955	1.11355	1.39919	1.16114	1.00272	1.66474	1.98771	1.81514	1.49223	1.69822	0.8024	1.16198	1.27145	--	PREDICTED: extensin-2-like isoform X1 [Solanum pennellii]
RHC12H2G2657.2.gene	28.2261	29.5926	28.5874	28.1233	32.0268	30.1649	35.6545	35.9967	32.4233	29.0496	25.4953	31.656	30.878	30.4322	30.017	31.256	37.4427	36.1523	35.2091	31.2843	30.1829	32.359	28.6264	32.768	Intracellular trafficking, secretion, and vesicular transport	PREDICTED: clathrin interactor EPSIN 3-like [Solanum tuberosum]
RHC12H2G2655.2.gene	4.78489	4.75653	7.3584	3.97233	3.50188	4.18361	3.73497	1.5527	3.95948	3.83742	4.60322	3.53629	1.50215	3.07037	4.89392	3.21738	3.77083	3.54575	3.13385	3.40709	4.35117	2.4578	4.45606	3.76029	Energy production and conversion	PREDICTED: V-type proton ATPase subunit e1 [Solanum lycopersicum]
RHC12H2G2654.2.gene	5.71403	1.64957	4.84565	2.20491	1.79986	1.62572	1.46832	1.77736	1.93831	1.30854	1.79375	2.01148	3.73485	5.24238	1.37983	1.67806	1.84077	1.78277	1.53521	2.09052	1.59976	7.32034	1.58805	1.82565	Function unknown	PREDICTED: 15-cis-zeta-carotene isomerase, chloroplastic isoform X2 [Solanum tuberosum]
RHC12H2G2653.2.gene	4.60977	10.1206	4.13914	5.06287	5.46485	5.08616	9.82051	3.05712	2.69381	20.6973	9.71095	5.751	3.64325	7.81096	2.41725	3.48763	3.57561	3.684	4.43585	3.93955	4.44074	7.02558	4.49005	4.75374	Replication, recombination and repair	PREDICTED: DEAD-box ATP-dependent RNA helicase 42 [Solanum tuberosum]
RHC12H2G2652.2.gene	5.58951	4.55307	5.21785	11.0304	10.6628	10.1422	7.67188	7.83656	7.62343	8.04025	5.58478	6.56342	4.98647	7.32503	5.04141	11.884	13.4789	12.722	8.75031	6.9854	6.82151	14.191	13.786	16.4313	Function unknown	PREDICTED: uncharacterized WD repeat-containing protein C2A9.03-like [Solanum tuberosum]
RHC12H2G2651.2.gene	24.4945	42.1675	38.0253	112.136	107.499	107.574	48.7068	47.3555	46.2966	112.557	119.931	118.297	39.3141	121.037	36.596	68.6116	57.5092	57.9504	101.246	120.912	120.127	86.2614	85.581	89.0522	Translation, ribosomal structure and biogenesis	PREDICTED: eukaryotic translation initiation factor 3 subunit H isoform X1 [Solanum tuberosum]
RHC12H2G2650.2.gene	8.6349	8.67904	7.95591	9.55896	9.91289	9.64786	8.16539	8.48404	9.03203	8.37724	7.53618	8.17125	6.93655	8.95285	6.95668	10.6249	10.4439	11.5806	7.01614	8.91526	8.40011	10.9741	10.5065	11.0737	Intracellular trafficking, secretion, and vesicular transport	PREDICTED: signal peptide peptidase-like 5 [Solanum tuberosum]
RHC12H2G2649.2.gene	8.4121	9.32689	8.44311	5.75684	5.88298	5.60902	5.27959	4.7172	6.04957	7.60372	8.37663	5.85208	3.79884	5.54246	3.85735	7.5701	8.54847	7.4572	5.54222	6.392	5.60339	6.45848	7.74549	6.43768	Function unknown	PREDICTED: uncharacterized hydrolase YugF isoform X1 [Solanum tuberosum]
RHC12H2G2648.2.gene	18.8199	20.3292	23.1606	28.4537	28.7378	28.8425	20.7109	18.216	19.9981	15.0982	17.3738	17.718	17.4954	12.4964	16.9098	34.4446	33.0449	32.2055	15.4907	15.7447	17.4534	35.3212	44.8977	38.851	Lipid transport and metabolism	PREDICTED: cycloeucalenol cycloisomerase [Solanum tuberosum]
RHC12H2G2647.2.gene	2.89394	2.78222	2.11655	1.66973	1.61166	1.84632	0.993356	1.68932	1.1584	1.21336	1.08502	1.43761	1.78484	1.3455	1.71535	2.6229	3.0985	2.67555	1.63039	1.45196	1.49998	2.46138	2.4736	2.36293	Cytoskeleton	PREDICTED: kinesin-like protein KIN12B [Solanum tuberosum]
RHC12H2G2646.2.gene	1.3911	0.716918	0.911557	0.684221	0.324383	0.398332	0.266032	0.457861	0.403709	0.19987	0.245781	0.231587	0	0.266554	0	0.350236	0.588426	0.555844	0.286558	0.455392	0.092751	0.262937	0.182815	0.26397	--	PREDICTED: transcription factor bHLH62-like [Solanum tuberosum]
RHC12H2G2645.2.gene	2.20141	1.72127	1.90295	1.32585	1.46654	1.24921	1.28153	1.35681	0.974636	1.8673	1.84154	1.76765	0.493063	1.82211	0.59464	1.1672	1.17882	1.1494	1.34468	2.124	2.33376	0.755741	0.765871	1.11778	--	PREDICTED: protein QUIRKY-like [Solanum tuberosum]
RHC12H2G2644.2.gene	0.850789	1.08831	0.874843	0.254142	0.391935	0.566813	0.466785	0.489953	0.390126	0.583276	0.583256	0.586956	0.588429	0.478727	0.447086	0.502157	0.261194	0.38997	0.609414	0.539595	0.683661	0.159335	0.1987	0.387611	--	PREDICTED: protein QUIRKY-like [Solanum tuberosum]
RHC12H2G2643.2.gene	0.768622	0.860513	0.818621	0.602475	0.694525	0.913093	0.410939	0.345274	0.393014	0.667931	0.480105	0.42791	0.311003	0.890744	0.397881	0.132818	0.315738	0.140736	0.703027	0.370608	0.769438	0.296679	0.361828	0.429515	--	PREDICTED: protein QUIRKY-like [Solanum tuberosum]
RHC12H2G2642.2.gene	3.17863	3.19258	3.08221	2.45255	2.39805	2.75559	2.31443	2.81076	3.07467	2.99142	2.27192	2.6652	0.560826	2.13964	0.926536	2.86461	2.96679	3.11865	2.29575	2.71565	2.7348	2.36912	3.05861	3.02027	--	PREDICTED: protein QUIRKY-like [Solanum tuberosum]
RHC12H2G2641.2.gene	4.7226	3.34743	3.35107	2.90078	1.87764	2.30126	3.94897	3.29807	3.99157	7.15695	4.57517	7.46848	2.66051	6.03888	4.48214	2.04199	1.56998	1.81204	6.23353	4.64842	5.56296	2.58615	1.94758	2.38697	Carbohydrate transport and metabolism	PREDICTED: xyloglucan endotransglucosylase/hydrolase 2-like [Solanum tuberosum]
RHC12H2G2640.2.gene	64.4662	68.0953	57.8813	10.2779	10.0491	8.44898	11.6304	12.8265	13.5119	2.59018	2.50592	2.36335	7.39369	1.2082	8.62057	7.35616	7.17039	7.29673	1.10997	1.32344	1.0277	6.63643	7.58661	6.78456	Function unknown	PREDICTED: crocetin glucosyltransferase, chloroplastic-like [Solanum lycopersicum]
RHC12H2G2638.2.gene	5.71785	5.50259	5.52895	4.58499	4.35472	4.70529	5.15081	5.68776	5.09527	4.7231	4.66053	5.26102	6.35273	4.92579	6.977	3.90365	4.24152	4.24297	5.41926	5.33631	5.20951	4.98076	5.06108	4.52355	Signal transduction mechanisms	PREDICTED: receptor-like kinase TMK4 [Solanum tuberosum]
RHC12H2G2636.2.gene	3.4273	4.237	4.94408	6.94184	9.40879	9.81488	6.10931	6.54813	5.56255	11.3447	13.4112	7.9655	4.32257	10.5119	4.72153	9.54126	9.69623	9.86593	12.3512	10.0956	10.5991	9.76581	11.4568	10.9601	Function unknown	PREDICTED: histidine protein methyltransferase 1 homolog [Solanum tuberosum]
RHC12H2G2635.2.gene	5.96659	6.01994	6.29591	22.321	23.7128	23.68	13.2058	14.2031	12.8701	28.6448	28.3757	27.3869	8.55853	24.9545	9.26653	18.0969	20.1522	20.7161	25.4588	24.3193	25.3042	28.2661	26.5879	27.0444	Transcription	PREDICTED: heat stress transcription factor A-5 [Solanum pennellii]
RHC12H2G2633.2.gene	13.0952	14.8272	15.2071	8.87326	9.61741	9.57342	11.5251	13.1585	11.1247	8.38382	8.89519	5.86871	8.81157	7.50302	6.03112	5.78657	15.0525	16.5321	16.012	7.45498	7.93027	8.70389	6.91022	7.85502	Coenzyme transport and metabolism	PREDICTED: adenosylhomocysteinase [Solanum tuberosum]
RHC12H2G2632.2.gene	2.22174	4.67296	2.67657	1.32694	1.34839	1.65841	2.32835	2.32479	2.4671	1.53535	1.1585	1.07048	1.69206	3.43912	1.65278	1.85613	1.98943	2.95724	2.20927	1.59783	1.60789	1.02714	1.22277	1.09929	Amino acid transport and metabolism	PREDICTED: serine hydroxymethyltransferase 4-like [Solanum tuberosum]
RHC12H2G2631.2.gene	5.35348	9.83929	4.80332	3.43781	3.53016	3.26231	14.1717	16.2199	15.4923	5.51313	5.2928	5.54769	9.57136	10.165	11.4968	11.3156	11.2089	9.7024	5.02436	5.05257	4.88719	7.93015	7.47917	8.04217	Cell wall/membrane/envelope biogenesis	PREDICTED: UDP-glucuronate 4-epimerase 6-like [Solanum tuberosum]
RHC12H2G2630.2.gene	6.3198	6.3872	6.54586	6.92004	7.74633	7.24628	6.04716	7.18234	6.10676	7.66591	7.47314	7.32786	5.01411	7.69412	6.23258	6.43357	7.86842	7.18126	8.51816	8.01685	7.36836	7.46265	7.29167	7.22038	--	PREDICTED: myb-like protein X [Solanum pennellii]
RHC12H2G2628.2.gene	24.769	25.9476	24.708	21.0681	21.8514	23.4521	20.9027	21.4853	21.4073	18.8374	16.4007	17.8834	18.0151	19.6696	17.9215	20.9089	23.1167	21.1364	21.1179	20.4954	19.6862	19.6911	20.7271	22.8642	Function unknown	Actin-related protein 2/3 complex subunit 4 [Capsicum chinense]
RHC12H2G2627.2.gene	10.1391	11.8196	10.8428	10.8355	12.3406	10.6159	9.62604	9.09455	8.8977	5.90502	6.96612	6.81726	8.10405	8.96775	7.98556	8.99557	10.2034	10.9522	7.87826	6.26073	8.1001	11.4565	11.0303	8.89005	Amino acid transport and metabolism	PREDICTED: histidine biosynthesis bifunctional protein hisIE, chloroplastic [Solanum pennellii]
RHC12H2G2626.2.gene	0.574356	0.470586	0.408517	0.392515	0.297106	0.328584	0.550092	0.221929	0.73855	0.734433	0.669436	0.416516	0.242487	1.02331	0.645296	0.425837	0.559104	0.42104	0.558802	0.532755	0.609076	0.402933	0.100418	0.501241	Function unknown	PREDICTED: PLASMODESMATA CALLOSE-BINDING PROTEIN 3-like [Solanum tuberosum]
RHC12H2G2624.2.gene	1.25364	1.17567	0.866457	2.21735	2.01384	2.01971	1.32515	1.1195	1.09721	1.93825	1.97739	2.003	0.64058	1.58764	0.976495	1.7288	1.88449	1.93052	1.32438	1.7771	1.82937	2.3767	1.91825	2.25815	Function unknown	PREDICTED: uncharacterized protein LOC107007413 isoform X5 [Solanum pennellii]
RHC12H2G2623.2.gene	1.61175	1.59861	1.57134	6.02929	6.05215	6.13733	4.48725	5.44109	4.10129	6.25109	6.60888	6.21193	3.13844	6.06437	3.01345	7.83997	7.2686	7.89141	5.48645	4.46007	5.47084	7.62454	7.75981	8.87428	Function unknown	PREDICTED: uncharacterized protein LOC102586054 [Solanum tuberosum]
RHC12H2G2622.2.gene	4.59187	3.80022	4.41266	2.53048	3.93405	3.37139	7.39476	6.56558	4.26971	2.65674	3.79294	3.78	4.72931	3.01491	3.64394	4.59312	6.51618	5.86836	3.38772	3.1111	3.19997	6.05353	3.91145	6.20035	Transcription	PREDICTED: myb family transcription factor APL-like isoform X1 [Solanum tuberosum]
RHC12H2G2621.2.gene	1.34825	1.34785	1.20913	4.1204	4.72592	4.47572	1.15583	3.29861	0.85029	3.86737	3.02559	1.77837	0.64326	5.37599	0.609674	4.58057	0.939422	3.42875	3.79446	4.5233	4.60556	4.40461	5.43609	2.42364	Function unknown	PREDICTED: NADH dehydrogenase [ubiquinone] complex I, assembly factor 7 homolog [Solanum tuberosum]
RHC12H2G2620.2.gene	46.3595	51.8853	46.634	40.8764	41.0198	35.5065	53.5969	44.0284	54.4071	32.3601	34.7132	41.578	38.4996	38.1103	40.8309	43.0767	43.5427	36.1849	34.7691	38.9765	36.9176	33.7201	39.8856	38.5352	Translation, ribosomal structure and biogenesis	PREDICTED: translation initiation factor IF-1, chloroplastic [Solanum pennellii]
RHC12H2G2618.2.gene	120.963	131.301	131.795	115.786	107.128	104.537	87.7252	87.1288	86.0065	79.8704	88.6725	77.6901	101.711	103.929	88.6393	86.7439	81.6447	83.9514	95.0192	101.956	104.215	80.8564	79.2661	77.1709	Translation, ribosomal structure and biogenesis	PREDICTED: 60S ribosomal protein L13a-4 [Solanum tuberosum]
RHC12H2G2616.2.gene	8.59212	9.72007	10.0954	13.5268	12.6775	12.0306	14.0709	15.6093	15.181	17.4706	19.7416	17.2916	7.00347	15.8782	9.23014	15.9629	15.4723	16.3937	23.1026	14.0281	14.3754	16.6185	15.5882	17.0282	Signal transduction mechanisms	PREDICTED: cyclin-dependent kinase inhibitor 4-like [Solanum pennellii]
RHC12H2G2613.2.gene	11.4151	6.85645	8.57893	6.47227	6.84373	6.63131	7.22952	9.42304	8.66897	3.74047	3.07465	3.3586	4.61995	3.67634	6.72861	8.55042	6.21108	5.46414	3.44785	5.32932	4.94548	5.95237	5.52421	8.24702	--	--
RHC12H2G2612.2.gene	7.59368	8.03938	5.80827	9.33236	9.26359	6.70179	2.63389	4.67277	5.21363	2.82359	4.34665	3.16167	4.87333	3.12959	4.12059	3.35159	5.74252	6.01596	3.20371	5.35048	4.08426	4.58529	12.8394	5.13093	Function unknown	PREDICTED: uncharacterized protein LOC102603403 [Solanum tuberosum]
RHC12H2G2608.2.gene	1.3742	0.98026	0.954588	1.01182	1.81157	2.57207	1.84743	0.832492	0.524032	1.31413	1.43407	1.33093	0.634703	1.80876	0.818531	2.10287	1.22449	1.7115	3.62524	2.35046	2.40917	2.63177	1.70113	2.22754	Function unknown	PREDICTED: putative F-box protein PP2-B12 [Solanum tuberosum]
RHC12H2G2605.2.gene	2.96855	3.02426	2.91098	3.77345	3.94345	4.41444	2.7698	2.7949	2.04469	3.48842	2.97361	3.10229	2.08734	2.9389	2.0382	3.60039	4.33884	3.6214	2.9565	3.10096	2.67636	3.48073	4.45878	3.84431	Function unknown	PREDICTED: protein ALWAYS EARLY 3-like [Solanum tuberosum]
RHC12H2G2604.2.gene	30.6221	32.0299	34.7367	21.0319	18.1225	16.0425	27.8913	28.0066	24.2893	27.2241	26.7341	29.2854	26.8743	29.0157	30.0957	17.5264	15.0606	17.404	24.9215	26.6441	24.459	17.1916	20.8543	16.6415	Energy production and conversion	PREDICTED: probable voltage-gated potassium channel subunit beta [Solanum lycopersicum]
RHC12H2G2599.2.gene	0.591047	0.970168	0.332848	0.395997	0.233048	0.215489	0.484699	0.553376	0.247638	0.483708	0.630965	0.823587	0.203227	0.491492	0.095532	0.862985	0.684198	0.684157	0.47056	0.281551	0.416096	0.41638	0.941386	0.459056	Secondary metabolites biosynthesis, transport and catabolism	Chalcone synthase 2 [Capsicum chinense]
RHC12H2G2598.2.gene	0.270331	0.130808	0.237103	0.529713	0.440507	0.343252	0	0	0	0.260282	0.389846	0.25592	0	0.159703	0	0.304743	0.30162	0.140626	0.109228	0	0	0.33291	0.482215	0.604331	Secondary metabolites biosynthesis, transport and catabolism	PREDICTED: chalcone synthase J-like [Solanum tuberosum]
RHC12H2G2594.2.gene	3.68443	3.99012	4.95799	0.264437	0.192081	0.356766	0.514983	0.545312	0.622942	0.290682	0.213951	0.263726	0.77531	0.356686	0.814265	0.257119	0.347099	0.309641	0.295911	0.109284	0.246937	0.377967	0.235599	0.412412	Secondary metabolites biosynthesis, transport and catabolism	PREDICTED: chalcone synthase J-like [Solanum tuberosum]
RHC12H2G2593.2.gene	0.534192	0.35469	0.775072	0	0	0	0.086294	0.105864	0	0.536066	0.072317	0.171421	0	0.277178	0.140283	0	0.189802	0	0.328077	0.369758	0.376373	0	0	0	Function unknown	PREDICTED: dirigent protein 18-like [Solanum tuberosum]
RHC12H2G2590.2.gene	1.19528	0.782064	0.665165	1.95307	2.10826	1.76329	1.3032	1.27092	1.20084	1.16908	1.47048	0.897463	0.898837	1.41655	0.400221	1.43029	1.40363	1.7693	1.84097	1.44239	1.84376	1.76899	1.98423	1.44395	Function unknown	PREDICTED: uncharacterized protein LOC102594873 [Solanum tuberosum]
RHC12H2G2589.2.gene	0.692356	0.480654	1.23981	2.4246	1.23292	1.79985	0.472169	0.417022	0.464049	0.472608	0.837935	0.92384	0.324239	1.13527	0.385634	1.03669	1.09694	0.677307	1.09711	0.926015	0.582637	1.3102	1.03791	1.31965	Function unknown	PREDICTED: golgin subfamily A member 1-like [Solanum tuberosum]
RHC12H2G2588.2.gene	19.4685	14.3513	20.9886	24.0677	16.0019	17.7174	14.4813	12.9825	12.0802	14.5922	14.2723	10.9857	14.1154	13.8897	13.865	17.6812	13.7147	12.6945	14.4039	15.884	18.6658	17.7698	21.4425	19.0107	Function unknown	PREDICTED: small acidic protein 1 [Solanum lycopersicum]
RHC12H2G2587.2.gene	4.45103	4.20705	4.25332	6.99521	6.24299	5.28765	4.77014	3.84837	3.78293	5.66088	7.05093	5.88277	2.64644	4.70414	3.9891	4.4455	3.34282	3.82295	4.79756	5.69846	5.84547	4.6766	4.28018	4.8172	Cell wall/membrane/envelope biogenesis	PREDICTED: carboxyl-terminal-processing peptidase 2, chloroplastic isoform X1 [Solanum tuberosum]
RHC12H2G2586.2.gene	0.424658	0.240634	0.201167	0.216947	0.308613	0.28365	0.139854	0.299166	0.147339	0.214322	0.379971	0.313573	0.260317	0.324684	0.314217	0.206021	0.218704	0.179105	0.278837	0.266754	0.253219	0.200927	0.212785	0.255905	--	PREDICTED: TMV resistance protein N-like [Solanum tuberosum]
RHC12H2G2585.2.gene	0.982501	0.935594	0.871853	1.13916	1.16047	1.60036	0.577461	0.796946	0.419616	1.00746	1.1625	1.04613	0.580055	0.929145	0.634657	0.696947	0.679814	0.591372	0.990377	0.771672	0.765247	1.03751	0.731692	0.969433	Function unknown	PREDICTED: TMV resistance protein N-like [Solanum tuberosum]
RHC12H2G2582.2.gene	0.316827	0.273425	0.347323	0.421462	0.202703	0.329906	0.059687	0.193023	0.156954	0.188615	0.151276	0.204594	0.266847	0.308585	0.3388	0.099351	0.10918	0	0.354411	0.293008	0.170119	0.135187	0.287813	0.407549	Function unknown	PREDICTED: TMV resistance protein N-like [Solanum tuberosum]
RHC12H2G2581.2.gene	3.72261	4.59258	4.11066	5.09206	5.09627	3.77812	3.60711	3.71463	3.3149	4.72041	3.79518	3.97948	3.24407	4.44567	2.85084	3.19937	3.91883	4.49132	4.18612	4.16535	3.0016	3.89755	4.57575	4.48613	Function unknown	PREDICTED: histone-lysine N-methyltransferase family member SUVH9-like [Solanum tuberosum]
RHC12H2G2580.2.gene	2.60046	2.22641	2.44767	2.24207	2.13207	1.29857	2.00049	1.26534	2.29389	1.9739	1.53772	1.71207	1.03077	1.88173	0.643965	1.19702	2.36308	1.28614	2.81649	1.3978	1.62065	1.39319	2.23745	1.71734	--	PREDICTED: auxin-responsive protein IAA13-like isoform X2 [Solanum tuberosum]
RHC12H2G2577.2.gene	0.56024	0.54321	0.638208	1.08947	0.673738	0.731755	0.146229	0.079212	0.225913	0.347638	0.133118	0.293676	0.33288	0.273416	0.101471	0.447204	0.667058	0.361166	0.232287	0.580815	0.343911	0.267012	0.556981	0.395321	Replication, recombination and repair	PREDICTED: oxidation resistance protein 1-like isoform X1 [Solanum tuberosum]
RHC12H2G2576.2.gene	5.75679	6.87142	5.9099	7.55525	6.78142	7.27946	4.09959	4.84515	3.97998	4.89789	6.68531	4.96767	3.80679	5.84791	3.04847	7.12636	5.25235	5.26768	5.06537	4.74216	4.8941	6.76692	6.62802	6.2652	RNA processing and modification	PREDICTED: pre-mRNA-processing factor 19 homolog 1-like isoform X1 [Nicotiana tomentosiformis]
RHC12H2G2573.2.gene	0.505046	0.725306	0.464189	0.689296	0.51374	0.388942	0.514023	0.729533	0.333426	0.494152	0.484223	0.662005	1.00137	0.488582	0.912956	0.659891	0.738117	0.757742	0.424885	0.372561	0.447918	0.53115	0.644359	0.510154	Function unknown	PREDICTED: probable disease resistance RPP8-like protein 2 [Solanum tuberosum]
RHC12H2G2572.2.gene	3.1695	3.12394	3.17391	1.89419	3.51732	1.23019	1.6987	3.31465	1.62085	2.76605	3.30349	3.14558	2.53106	3.1097	3.0089	2.07536	2.90608	1.49028	2.87176	2.59576	1.75729	1.32578	3.43094	2.72637	--	PREDICTED: protein PHLOEM PROTEIN 2-LIKE A8-like [Solanum tuberosum]
RHC12H2G2571.2.gene	3.53043	3.11755	3.38737	1.41827	3.45085	4.01432	4.47267	4.66142	4.25747	3.05007	2.08863	2.70159	3.35685	3.4544	3.04757	4.27285	3.47769	3.03346	2.58948	3.50632	1.77697	3.40928	3.40832	3.49843	--	PREDICTED: protein PHLOEM PROTEIN 2-LIKE A8-like [Solanum tuberosum]
RHC12H2G2566.2.gene	1.24358	3.93317	1.81303	1.72177	1.95937	1.41125	2.13793	3.07671	1.76653	2.00006	2.06837	3.55819	0.954749	2.36178	2.49874	1.48485	3.58471	2.87192	3.4426	2.40834	3.15408	1.43987	2.0618	1.95736	Function unknown	PREDICTED: UDP-glycosyltransferase 74E2-like [Solanum tuberosum]
RHC12H2G2565.2.gene	10.647	7.48749	9.44446	6.75863	5.74948	6.51711	6.50542	3.05688	5.50399	5.8004	5.00466	3.34411	2.80161	4.13345	2.51947	7.18611	4.03535	4.48112	3.4272	6.28639	3.61868	6.01328	4.55454	5.70092	Function unknown	PREDICTED: UDP-glycosyltransferase 74E2-like [Solanum pennellii]
RHC12H2G2564.2.gene	2.01334	1.88481	2.06377	6.19488	5.63255	5.56617	2.08016	1.99716	1.57918	4.14095	3.55793	3.08775	1.22833	2.91298	1.0572	1.9853	1.97937	2.49797	2.79421	3.02294	4.26015	4.98532	4.44556	4.64451	Function unknown	PREDICTED: UDP-glycosyltransferase 74E2-like [Solanum lycopersicum]
RHC12H2G2563.2.gene	0.378464	0.42022	0.381693	4.08036	3.99849	4.03386	1.27883	1.1674	0.85977	2.691	1.96355	2.45507	1.5852	2.56063	1.67335	1.38752	1.38509	0.601355	1.55479	1.64466	1.97664	3.28547	3.13267	2.99809	Function unknown	PREDICTED: LETM1 and EF-hand domain-containing protein 1, mitochondrial-like [Solanum tuberosum]
RHC12H2G2561.2.gene	1.01812	1.38586	1.95081	4.81743	5.09262	4.46775	0.878975	1.14466	0.576997	2.29407	1.42389	1.15723	0.549471	1.74656	0.313368	2.04144	1.47338	1.52204	1.07704	1.49648	1.42976	4.02692	3.26861	4.50561	--	PREDICTED: acetyl-CoA-benzylalcohol acetyltransferase-like [Solanum tuberosum]
RHC12H2G2560.2.gene	0.75359	3.76041	4.02814	15.3319	15.3545	20.9122	1.12562	2.38537	1.48816	7.11553	5.48696	2.89082	0.427187	1.70221	1.0357	3.40691	1.27761	4.51385	1.79348	1.60852	2.17018	10.6446	11.4801	9.90811	Energy production and conversion	PREDICTED: probable trans-2-enoyl-CoA reductase, mitochondrial [Solanum lycopersicum]
RHC12H2G2556.2.gene	8.40874	7.40275	7.79889	86.0992	83.0478	78.047	7.20677	4.13206	3.334	18.8159	17.332	21.1044	4.40664	7.2234	3.64112	19.5421	15.2152	14.9599	11.4486	13.8156	10.9341	60.6971	75.2036	69.356	Energy production and conversion	PREDICTED: probable trans-2-enoyl-CoA reductase, mitochondrial [Solanum lycopersicum]
RHC12H2G2555.2.gene	21.2118	21.0561	23.8814	50.5937	59.7972	49.4442	20.9115	18.2657	19.1969	25.768	26.1233	31.5116	16.4628	25.1985	19.6555	33.4919	32.4209	30.9305	26.0391	26.3965	23.3442	49.9176	48.7788	55.9232	Function unknown	PREDICTED: 2-alkenal reductase (NADP(+)-dependent)-like [Solanum tuberosum]
RHC12H2G2548.2.gene	93.5958	100.958	110.573	100.277	98.3344	98.0081	92.0415	83.8153	79.971	69.5251	80.8469	81.198	88.9857	87.0062	64.6025	93.1205	82.3876	74.6615	102.632	91.7156	104.671	74.9203	72.9965	82.2054	Translation, ribosomal structure and biogenesis	PREDICTED: 60S ribosomal protein L9-1-like [Solanum pennellii]
RHC12H2G2547.2.gene	11.2706	13.0333	12.4991	13.4324	11.17	12.8117	12.0002	10.8254	11.3201	10.4842	13.7392	8.50487	8.99529	13.5954	9.43932	11.9123	9.67022	9.77407	11.1037	11.8447	12.8298	10.5689	13.6872	8.97069	Cell cycle control, cell division, chromosome partitioning	PREDICTED: cytosolic Fe-S cluster assembly factor NBP35-like [Solanum tuberosum]
RHC12H2G2546.2.gene	6.69473	6.7677	7.27227	5.69934	5.38977	4.59162	3.35734	3.50994	2.52619	4.82095	5.62096	4.96501	5.1135	5.86508	4.10644	3.7504	4.35431	4.24671	4.4822	5.43524	5.6472	5.91395	5.3327	4.55142	Cell cycle control, cell division, chromosome partitioning	PREDICTED: cytosolic Fe-S cluster assembly factor NBP35-like [Solanum tuberosum]
RHC12H2G2545.2.gene	0.440396	0.102334	0.253212	0.72858	1.18415	1.00553	0.077246	0.232579	0.138951	0.596755	0.69126	0.578651	0.156703	0.732571	0.106795	0.417531	0.215318	0.444288	0.399088	0.637139	0.537565	0.603626	0.678234	0.749993	Function unknown	PREDICTED: pentatricopeptide repeat-containing protein At2g03880, mitochondrial [Solanum tuberosum]
RHC12H2G2544.2.gene	3.40646	3.4557	3.99919	6.78446	6.41145	5.41748	2.72282	2.90947	5.24298	2.94715	2.99917	2.76181	0.79345	5.53937	1.74333	4.35629	4.2443	4.53968	3.03193	2.70944	2.67725	17.267	6.81425	6.30469	Function unknown	PREDICTED: ankyrin repeat-containing protein At5g02620-like [Solanum tuberosum]
RHC12H2G2542.2.gene	4.88144	6.10605	6.43898	5.36533	7.19837	6.41355	6.39883	6.31285	7.43546	6.29787	6.227	5.72532	5.11517	4.5969	5.28708	7.98909	5.23151	6.47451	6.56878	6.2963	6.34652	6.72175	7.62395	7.01818	Intracellular trafficking, secretion, and vesicular transport	PREDICTED: vacuolar protein sorting-associated protein 20 homolog 2 [Solanum pennellii]
RHC12H2G2536.2.gene	1.86923	1.04117	1.92466	0.861062	1.23293	0.556914	2.22155	2.13915	1.89023	1.15842	1.67833	1.1562	1.07112	1.98647	1.2857	0.940674	1.66425	0.994178	1.61543	1.61347	1.74878	1.59974	1.39339	1.3695	Function unknown	PREDICTED: poly(ADP-ribose) glycohydrolase 1-like [Solanum tuberosum]
RHC12H2G2535.2.gene	1.96006	1.83015	2.01612	2.3562	2.81681	1.27014	1.71431	2.19796	2.28354	2.7006	1.2435	4.16507	2.13043	3.275	1.85428	1.17069	1.86113	2.29663	1.86988	1.59467	3.00508	1.13253	2.39729	2.3026	Coenzyme transport and metabolism	PREDICTED: 6,7-dimethyl-8-ribityllumazine synthase, chloroplastic-like [Solanum tuberosum]
RHC12H2G2534.2.gene	2.554	2.60968	2.0872	3.54656	3.50103	3.30176	1.82195	1.79733	1.91597	1.7047	2.09935	1.68957	1.2512	1.82996	1.20063	2.87833	2.48932	2.68711	1.87898	1.81684	1.67511	2.58019	2.96868	2.65939	Inorganic ion transport and metabolism	PREDICTED: potassium transporter 4-like [Solanum tuberosum]
RHC12H2G2533.2.gene	27.9841	28.2544	30.3826	29.1497	27.3647	27.7219	27.6657	28.6896	24.9615	24.9222	26.0082	25.0097	23.7513	30.3901	21.3892	31.3558	28.7582	28.4111	30.9813	28.6477	30.79	28.8701	29.2761	27.7959	--	PREDICTED: apyrase 2-like [Solanum pennellii]
RHC12H2G2532.2.gene	4.88706	3.60079	12.1867	1.41849	6.58156	6.11566	10.476	7.69161	2.25913	10.5496	1.70731	5.84922	9.73809	5.38477	8.22257	9.57643	1.14318	7.58447	10.4918	12.6539	10.8751	5.85507	2.07231	8.18215	Translation, ribosomal structure and biogenesis	40S ribosomal protein S10-like [Solanum tuberosum]
RHC12H2G2531.2.gene	2.07569	2.333	2.57656	3.84644	3.28293	3.12699	2.32405	2.34463	1.98012	1.96409	1.9506	1.71314	0.902783	1.8955	0.675417	2.76833	1.97074	2.59631	1.95062	2.17313	1.94054	1.7159	3.30692	3.00619	Carbohydrate transport and metabolism	PREDICTED: peroxidase 46-like [Solanum tuberosum]
RHC12H2G2530.2.gene	25.4999	23.0989	24.7294	20.9046	12.523	12.6951	19.8099	19.8313	20.7492	24.5961	23.1633	23.9653	16.2713	16.6373	19.3523	21.0715	20.8656	15.8397	20.3569	21.4848	21.2198	20.8952	19.4081	21.3113	Signal transduction mechanisms	PREDICTED: probable protein phosphatase 2C 59 [Solanum tuberosum]
RHC12H2G2529.2.gene	0.340967	0.315083	0.643466	0.814588	1.5183	1.22111	0.679886	0.95181	0.862082	0.90732	0.952619	0.805279	0.43627	0.988266	0.317956	1.52567	1.17719	1.4198	1.15981	1.23774	1.24092	1.25305	1.19408	1.3577	Function unknown	PREDICTED: pentatricopeptide repeat-containing protein At5g66520-like [Solanum tuberosum]
RHC12H2G2528.2.gene	155.805	149.115	153.636	113.537	121.131	107.475	145.019	146.068	152.431	177.89	184.128	173.565	145.44	175.379	132.425	147.086	148.703	142.01	153.341	171.491	180.005	140.945	136.093	144.591	Transcription	PREDICTED: zinc finger protein CONSTANS-LIKE 4-like [Solanum tuberosum]
RHC12H2G2527.2.gene	0.313471	0.370748	0.78525	0.479964	0.487648	0.644365	0.321571	0.751003	0.73934	0.777043	0.839557	0.050404	0.158504	0.274206	0.083304	1.65457	0.805011	1.10347	0.820248	0.989682	0.370377	1.84389	0.967018	0.3707	Intracellular trafficking, secretion, and vesicular transport	PREDICTED: protein GLUTAMINE DUMPER 5-like [Solanum tuberosum]
RHC12H2G2526.2.gene	0.377299	1.53703	1.46968	0.538221	1.11923	0.898796	0.381417	0.46073	1.12772	0.485662	0.816152	0.714958	0.915585	0.328064	0.121388	0.575287	0.805418	0.300374	0.883384	0.481438	0.103317	0.230054	0.142618	0.400512	--	PREDICTED: protein GLUTAMINE DUMPER 2-like [Solanum tuberosum]
RHC12H2G2525.2.gene	15.3856	19.0587	21.0982	18.9056	13.8425	10.578	18.235	18.4307	15.5949	13.6596	18.1187	18.1072	15.5136	13.3914	15.1868	25.7038	20.1343	20.3518	15.5062	14.6408	22.0301	18.5009	21.6352	19.4066	Transcription	PREDICTED: transcription initiation factor TFIID subunit 10 [Solanum lycopersicum]
RHC12H2G2524.2.gene	4.69844	5.40583	5.42985	6.25253	4.72719	5.88551	5.69248	5.22707	5.50747	6.1448	6.15501	5.30855	2.65112	5.27282	3.44814	5.91144	6.20095	5.14732	7.00831	6.52789	5.48089	6.76395	6.89463	6.78044	Function unknown	PREDICTED: uncharacterized protein LOC102579496 isoform X1 [Solanum tuberosum]
RHC12H2G2523.2.gene	11.1064	11.834	11.4171	9.73553	11.0492	10.7418	7.61793	6.72449	7.02279	10.3761	10.617	10.264	6.3196	11.3976	7.05764	7.60466	6.90554	9.03161	10.8332	10.1597	11.3694	8.22954	10.4725	9.86908	Function unknown	PREDICTED: zinc finger protein 622-like [Solanum tuberosum]
RHC12H2G2520.2.gene	0.632917	0.441646	1.1263	0.714474	0.922917	0.893935	6.34383	6.95507	6.10073	0.963313	1.40392	1.04089	38.9602	1.39959	36.7812	2.07336	2.50232	1.6646	1.45335	1.64348	1.47627	0.997483	0.983202	0.939948	Posttranslational modification, protein turnover, chaperones	PREDICTED: ubiquitin carboxyl-terminal hydrolase 18 isoform X1 [Solanum tuberosum]
RHC12H2G2519.2.gene	4.83872	4.24067	4.87992	5.57334	7.25803	5.2382	3.78518	5.35712	5.39887	5.40333	5.22428	5.92587	1.99674	6.16932	2.25582	6.50044	5.88034	6.17598	5.50034	6.22367	6.5699	5.91332	6.75621	5.46042	Posttranslational modification, protein turnover, chaperones	PREDICTED: uncharacterized protein DDB_G0292642-like [Solanum tuberosum]
RHC12H2G2517.2.gene	8.57133	8.90138	10.3874	12.3168	9.27073	9.94187	9.46618	9.38721	10.9943	8.87507	10.1443	8.50407	7.3252	8.83723	7.29414	12.1599	11.0465	11.3845	8.30541	9.53201	9.09716	11.0228	10.7356	13.8276	Function unknown	PREDICTED: putative peptidyl-tRNA hydrolase PTRHD1 [Solanum lycopersicum]
RHC12H2G2515.2.gene	2.5988	2.99506	3.64456	2.49135	2.97391	2.82853	2.00064	2.06793	1.90843	1.95223	1.99908	2.23712	1.82148	2.52887	1.68184	1.68602	2.27486	2.0941	2.72522	2.47915	2.44151	2.66734	2.63189	2.69921	Function unknown	PREDICTED: exocyst complex component EXO70A1 [Solanum tuberosum]
RHC12H2G2514.2.gene	1.37119	0.937382	1.18898	4.33895	4.19928	4.08069	2.44421	2.6263	2.82979	2.91302	2.42799	3.63894	2.10175	3.01217	1.81128	2.64415	3.92168	3.17377	3.7817	1.89156	3.14736	5.13242	4.49856	3.91104	Transcription	PREDICTED: probable WRKY transcription factor 17 [Solanum tuberosum]
RHC12H2G2513.2.gene	1.48789	1.85257	2.08887	3.18017	2.73577	2.70515	1.32243	1.42619	2.10605	1.78094	1.53832	1.97911	1.75623	1.42821	1.59894	2.27726	2.90592	2.4207	2.159	2.07	1.92023	2.71222	3.18862	3.02204	Intracellular trafficking, secretion, and vesicular transport	PREDICTED: putative UDP-sugar transporter DDB_G0278631 [Solanum tuberosum]
RHC12H2G2512.2.gene	1.39574	1.36507	2.1403	2.59866	2.48376	2.19998	1.55867	3.16764	1.65233	2.23225	2.45791	1.98659	0.931249	2.26379	1.3158	2.48332	1.49267	2.96367	1.81323	1.96968	3.02324	2.89081	2.66682	2.00568	Function unknown	PREDICTED: putative RNA methyltransferase At5g10620 isoform X1 [Solanum tuberosum]
RHC12H2G2511.2.gene	12.8603	14.4584	12.3347	42.0458	44.2504	39.8772	14.8609	15.1995	14.3124	20.499	21.3723	19.0646	9.79716	13.0654	9.57258	22.3582	18.9005	19.641	13.8009	12.8319	15.6988	23.0383	25.0333	22.4385	Inorganic ion transport and metabolism	PREDICTED: putative glutathione-specific gamma-glutamylcyclotransferase 2 [Solanum tuberosum]
RHC12H2G2510.2.gene	81.0068	80.7761	86.0328	73.1535	72.9765	73.8739	57.1906	60.5162	61.7048	54.8323	52.2402	56.4912	64.9016	67.2958	61.9561	49.5901	50.4724	47.9971	74.606	75.2925	68.5733	59.2692	53.3462	53.7174	Translation, ribosomal structure and biogenesis	40S ribosomal protein S6-1-like [Solanum tuberosum]
RHC12H2G2509.2.gene	2.89324	3.10913	3.60842	3.63344	4.21529	3.33115	2.58192	2.82763	2.19258	3.96855	3.24285	3.55242	2.05655	3.79854	2.11732	3.11456	3.12182	3.08199	3.13341	3.05518	3.64475	3.4604	3.57338	3.01078	Intracellular trafficking, secretion, and vesicular transport	PREDICTED: exocyst complex component SEC15A [Solanum tuberosum]
RHC12H2G2508.2.gene	3.24065	2.32643	2.84344	3.33845	3.16707	3.88352	2.50133	1.68358	1.49937	2.62563	2.10752	2.1962	1.41061	2.23322	1.05653	3.84826	2.26945	3.11378	2.37178	3.51377	1.91238	3.24981	4.49601	3.41782	Replication, recombination and repair	PREDICTED: endonuclease V isoform X1 [Solanum pennellii]
RHC12H2G2507.2.gene	9.2561	9.98651	9.95846	13.6816	11.9808	11.6433	10.6414	11.2534	11.1093	9.88564	9.94048	9.73377	7.03766	8.36391	8.94745	13.5207	9.59537	10.8248	9.34803	10.2573	8.49956	11.3125	11.5846	13.1322	Function unknown	PREDICTED: uncharacterized protein LOC102586116 [Solanum tuberosum]
RHC12H2G2506.2.gene	0.547912	0.580072	0.447549	2.07251	1.74137	1.71869	1.25956	1.66819	1.11729	1.45652	1.98441	1.1233	1.11913	0.966716	0.839752	1.88072	1.80602	1.70153	1.24969	1.52828	1.36455	1.87815	3.09666	2.46896	Function unknown	PREDICTED: ankyrin repeat and protein kinase domain-containing protein 1-like [Solanum tuberosum]
RHC12H2G2505.2.gene	0.802272	0.700467	0.699883	1.64377	1.55246	1.36988	0.746423	0.670698	0.446955	0.477166	0.336198	0.686459	0.208432	0.590888	0.140796	0.774935	0.44589	0.646396	0.671819	0.610148	0.674572	1.03545	0.700486	0.682991	Function unknown	PREDICTED: uncharacterized acetyltransferase At3g50280-like isoform X1 [Solanum lycopersicum]
RHC12H2G2503.2.gene	5.03639	5.12314	6.63856	9.00251	9.53123	8.56104	6.30825	6.4943	5.33993	6.93628	7.55025	7.71057	5.40908	7.28906	5.44526	6.07853	6.29937	6.50472	8.40911	8.33504	7.19361	8.80547	8.44998	7.60439	Replication, recombination and repair	PREDICTED: alkylated DNA repair protein alkB homolog 8 [Solanum tuberosum]
RHC12H2G2502.2.gene	497.155	383.832	412.975	349.375	515.376	354	353.434	433.983	442.902	316.833	344.543	404.116	403.46	339.206	309.616	342.515	287.463	309.542	427.626	443.122	380.796	348.762	327.634	320.105	Translation, ribosomal structure and biogenesis	PREDICTED: 60S ribosomal protein L7-4 [Solanum tuberosum]
RHC12H2G2501.2.gene	0.343242	0.548882	0.167528	0.432221	0.440208	0.365006	0.120105	0.261225	0	0.107447	0.321819	0.248983	0.206748	0.334987	0.205447	0.553093	0.413305	0.370943	0.655693	0.05419	0.38371	0.527623	0.28358	0.891508	Translation, ribosomal structure and biogenesis	PREDICTED: rop guanine nucleotide exchange factor 14 [Solanum tuberosum]
RHC12H2G2500.2.gene	8.66349	7.44712	7.8202	7.59372	7.27624	6.76904	7.64898	8.60505	10.9495	15.9839	11.2399	15.481	7.2564	14.8173	6.95649	11.6085	10.9301	11.8354	12.6168	12.4371	13.8495	10.4086	8.65051	8.86039	Amino acid transport and metabolism	PREDICTED: tryptophan synthase beta chain 2 [Solanum tuberosum]
RHC12H2G2499.2.gene	0.447323	0.691392	0.322443	0.540751	0.38305	0.09076	0.328688	0.691837	0.214966	0.188933	0.040654	0.622365	0.638701	0.531601	0.109328	0.204629	0.85871	0.703317	0.787086	0.380404	0.498195	0.325134	0.739148	0.451045	--	PREDICTED: uncharacterized protein LOC102602791 [Solanum tuberosum]
RHC12H2G2498.2.gene	23.6514	23.5103	19.4091	10.6074	12.4815	10.1898	11.9982	9.82677	11.2898	15.962	16.8275	15.3963	9.65052	17.1069	10.0834	13.6542	10.7533	13.1702	14.9513	15.2383	17.973	11.5931	10.579	10.6446	Function unknown	PREDICTED: uncharacterized protein LOC102588972 [Solanum tuberosum]
RHC12H2G2497.2.gene	4.67619	4.44152	3.90828	2.87797	2.97753	3.27292	4.20269	3.82984	3.41692	1.27906	1.71859	1.32682	4.99303	1.94761	2.52886	3.64342	2.99841	2.24438	1.58308	1.06748	2.53982	2.28005	3.1603	1.70082	Function unknown	PREDICTED: uncharacterized protein LOC102589289 [Solanum tuberosum]
RHC12H2G2496.2.gene	10.6399	10.2867	13.1213	7.84966	8.86782	8.38472	6.19987	7.10684	8.03871	5.85648	5.73432	5.55399	5.68936	6.25432	5.76511	7.79408	7.98358	8.20607	5.56147	6.29666	7.01574	9.99257	7.99992	9.73119	Function unknown	PREDICTED: WAT1-related protein At4g19185-like isoform X1 [Solanum tuberosum]
RHC12H2G2495.2.gene	152.206	146.514	176.876	141.103	132.076	146.294	111.793	99.8139	107.79	115.271	116.128	118.252	130.655	134.873	115.241	96.8606	89.327	102.674	138.512	148.771	141.732	114.569	109.769	115.154	Translation, ribosomal structure and biogenesis	PREDICTED: 60S ribosomal protein L13-1-like [Solanum tuberosum]
RHC12H2G2494.2.gene	8.37317	8.77952	9.27298	6.60225	7.02813	9.59967	6.48705	7.66524	8.09623	7.12557	6.65498	7.0196	6.10436	9.17386	5.21151	6.91657	6.29539	6.35809	8.42581	7.3547	8.34759	7.98334	7.57921	8.66972	Function unknown	PREDICTED: pentatricopeptide repeat-containing protein At4g38150 [Solanum tuberosum]
RHC12H2G2493.2.gene	12.1429	11.8783	11.8367	18.8048	15.2668	17.0047	10.4445	9.41301	14.4838	12.464	22.982	11.8733	10.2498	15.2769	12.4382	14.8938	16.4891	12.4101	12.1331	18.8957	9.59118	14.5675	14.7703	15.4323	Posttranslational modification, protein turnover, chaperones	PREDICTED: ubiquitin-fold modifier 1 [Solanum tuberosum]
RHC12H2G2492.2.gene	2.40013	1.71241	2.23683	3.47813	3.45003	3.57087	2.12417	1.99625	1.94989	2.97457	3.13813	2.15926	1.38736	2.05387	0.742821	2.23521	1.87917	1.75158	2.38466	1.91497	2.05655	2.58538	2.82163	2.35948	Function unknown	PREDICTED: protein BREVIS RADIX-like [Solanum tuberosum]
RHC12H2G2491.2.gene	9.64199	9.59778	10.3704	11.8065	12.1974	10.3594	14.4046	13.4331	11.4699	12.7937	16.1231	11.1595	12.2848	12.1156	12.7103	12.3129	11.7468	10.5742	11.0076	14.3963	11.4588	9.70883	9.99592	8.45147	Function unknown	PREDICTED: scopoletin glucosyltransferase-like [Solanum tuberosum]
RHC12H2G2490.2.gene	3.87548	5.4901	4.79193	7.56583	8.31923	9.34461	4.97767	6.78014	5.72778	5.09315	6.26195	5.87391	3.88938	5.95423	3.24632	5.42588	7.64895	7.19308	5.73506	5.01915	4.74382	7.36294	7.18697	6.2757	Transcription	PREDICTED: growth-regulating factor 4-like [Solanum pennellii]
RHC12H2G2489.2.gene	9.12993	8.55386	10.8282	12.8176	11.5756	12.6231	10.1747	11.847	12.537	13.7178	15.5626	11.074	6.97352	12.5356	8.19589	11.696	11.5014	14.7236	16.0851	15.8362	15.8285	15.4126	11.4911	13.0498	Function unknown	PREDICTED: MOB kinase activator-like 1A [Solanum lycopersicum]
RHC12H2G2488.2.gene	5.80585	5.63452	6.51553	9.88717	8.14158	6.74023	6.90935	5.05253	6.00321	6.52804	8.04147	5.43941	3.74084	8.06337	3.66619	7.95968	7.74772	8.24435	8.53917	4.53992	8.06443	9.72803	11.1792	9.7725	Function unknown	PREDICTED: protein ENHANCED DISEASE RESISTANCE 2 isoform X1 [Solanum tuberosum]
RHC12H2G2487.2.gene	7.28964	6.63828	5.78637	5.6177	6.17927	6.12702	5.24861	5.38255	6.41916	3.2484	4.21987	4.61417	5.88327	5.09928	5.18077	3.97644	6.74989	5.53989	4.4605	5.29384	4.94331	4.77465	4.08504	6.05451	Function unknown	PREDICTED: PHD finger protein ALFIN-LIKE 4-like [Solanum pennellii]
RHC12H2G2486.2.gene	3.43257	2.4	2.4248	4.11136	4.33065	3.69977	3.29886	3.5709	3.03423	3.3275	3.32362	3.62995	1.3182	2.84746	1.67884	3.11314	2.63566	3.22764	4.41688	3.56077	3.40475	3.57952	3.46133	3.0755	Function unknown	PREDICTED: solute carrier family 25 member 44-like [Solanum tuberosum]
RHC12H2G2485.2.gene	51.2004	57.8541	51.5268	17.1987	10.4106	9.1454	35.7297	31.6834	30.6095	37.6002	38.4751	26.6748	14.5514	23.4046	17.0651	27.444	30.9454	26.1463	20.7947	41.4243	34.8925	21.2311	20.2232	24.1499	Signal transduction mechanisms	PREDICTED: probable protein phosphatase 2C 53 [Solanum tuberosum]
RHC12H2G2484.2.gene	1.6887	1.35994	1.30301	1.32699	1.56839	1.61352	0.99483	0.951854	1.0053	1.13395	1.08725	1.08949	0.894013	1.17434	0.956319	1.11747	1.27052	1.78467	1.85354	1.23233	1.08129	1.05077	1.3615	1.19623	Signal transduction mechanisms	PREDICTED: U-box domain-containing protein 35-like isoform X2 [Solanum tuberosum]
RHC12H2G2483.2.gene	43.2525	43.4865	44.584	28.4351	33.7219	30.7543	27.0356	31.0116	25.6231	24.2536	23.6682	26.8861	30.2962	31.847	26.4891	30.3229	32.1637	31.7485	23.6961	29.7608	30.7764	31.561	23.9461	29.1363	Replication, recombination and repair	PREDICTED: eukaryotic initiation factor 4A-2-like [Solanum tuberosum]
RHC12H2G2482.2.gene	70.8869	70.7423	67.6256	69.4586	63.6293	69.2443	64.0214	63.7112	62.391	67.6441	65.0904	65.556	59.2933	74.8705	55.2556	70.8038	73.2546	70.3806	71.419	72.5558	72.2176	63.1281	64.7935	61.7662	Replication, recombination and repair	PREDICTED: eukaryotic initiation factor 4A-2 [Solanum tuberosum]
RHC12H2G2481.2.gene	7.33193	6.34389	6.7175	6.38091	4.33045	7.21704	7.31822	5.20425	5.77882	4.79081	5.67953	3.7925	3.0602	6.00586	2.93288	7.14551	7.42897	7.39965	6.04361	5.52042	4.2844	6.72357	6.21708	6.3207	--	PREDICTED: uncharacterized protein LOC102594733 [Solanum tuberosum]
RHC12H2G2480.2.gene	1.38919	1.82246	2.70242	1.47981	1.01225	1.56158	1.70855	1.08381	0.697097	1.15116	2.30962	1.94786	1.03014	1.71447	1.35612	1.23514	1.37713	1.47142	0.843291	1.44615	2.48073	1.30832	2.24283	1.53916	Function unknown	PREDICTED: abscisic acid receptor PYL2-like [Solanum tuberosum]
RHC12H2G2479.2.gene	47.0401	44.4586	41.8036	57.5933	54.7078	55.8762	36.7794	40.4077	35.1849	54.298	48.9415	50.8518	30.3008	53.8434	29.1099	43.9817	46.068	45.0055	49.9362	50.2133	50.8313	53.7886	56.8649	56.0017	Function unknown	PREDICTED: far upstream element-binding protein 2-like [Solanum tuberosum]
RHC12H2G2478.2.gene	4.51592	4.47889	5.08506	6.48421	7.23964	7.13019	5.5553	6.1979	3.62954	5.26867	6.37996	5.86471	4.49927	6.44648	3.84856	5.14618	5.66714	4.57874	6.41438	6.61282	6.96131	6.75662	4.65145	5.61626	Function unknown	PREDICTED: uncharacterized protein C6G9.01c [Solanum tuberosum]
RHC12H2G2477.2.gene	4.82252	5.91327	8.1473	9.06877	9.41303	7.08347	2.67247	5.55907	3.64946	4.82959	4.12551	4.79933	2.09826	4.63824	1.73028	7.53635	6.00502	3.64164	5.63297	4.6333	5.60199	8.18822	3.99986	6.69781	Amino acid transport and metabolism	PREDICTED: serine hydroxymethyltransferase 3, chloroplastic-like [Solanum tuberosum]
RHC12H2G2476.2.gene	7.14001	8.40813	8.5751	9.2403	7.66145	9.05169	8.99843	7.97058	8.12582	9.10602	6.90356	8.11347	7.42725	8.69835	6.51536	7.84913	9.54005	8.83687	9.45538	8.21355	6.96257	6.04808	8.34555	7.75294	Function unknown	PREDICTED: uncharacterized protein LOC102596388 [Solanum tuberosum]
RHC12H2G2475.2.gene	14.4613	14.0382	16.3908	65.1654	63.6038	61.6559	14.2963	15.6002	13.7427	21.7368	19.3971	19.9144	12.5586	17.676	11.8483	40.7212	45.6692	46.7981	19.2964	16.9599	15.5841	77.5137	71.9993	78.5564	Posttranslational modification, protein turnover, chaperones	PREDICTED: vacuolar-processing enzyme-like [Solanum tuberosum]
RHC12H2G2474.2.gene	10.2554	11.6022	10.1729	44.3949	44.0765	43.5864	16.232	16.2191	12.9161	21.7991	19.6336	20.0836	7.89195	17.1868	8.89607	18.6853	16.704	18.5444	17.165	15.5516	18.6052	23.9861	25.6001	22.811	Function unknown	PREDICTED: protein EARLY FLOWERING 3 [Solanum tuberosum]
RHC12H2G2473.2.gene	6.04336	7.61275	6.74482	15.7338	15.1126	14.6432	12.896	11.1704	9.02309	12.0159	11.8126	10.7663	6.38544	11.6345	6.75512	13.7126	11.2174	14.5305	11.3764	11.8529	11.5387	14.6952	15.3202	15.6409	RNA processing and modification	PREDICTED: nuclear poly(A) polymerase 4-like isoform X1 [Solanum tuberosum]
RHC12H2G2472.2.gene	4.17414	4.79176	4.51989	7.7936	7.97581	8.02409	9.34841	10.4475	10.1477	11.3404	10.7236	9.09452	9.08404	10.9907	8.06625	10.4986	12.7048	12.4821	11.9023	9.86704	11.286	9.00289	9.26848	8.9158	Carbohydrate transport and metabolism	PREDICTED: ATP-dependent 6-phosphofructokinase 6-like [Solanum tuberosum]
RHC12H2G2471.2.gene	8.6254	6.87924	7.8597	8.11555	8.12181	10.1869	7.1563	7.39876	5.72685	6.27038	6.70685	5.03216	6.05208	6.98859	6.70222	9.07009	9.3709	9.12649	7.60569	6.80361	9.8358	9.33908	9.7136	9.26509	Signal transduction mechanisms	PREDICTED: serine/threonine-protein kinase Aurora-2 [Solanum tuberosum]
RHC12H2G2470.2.gene	21.4042	16.6935	23.4243	18.101	18.1967	20.2691	18.145	21.0184	16.204	19.4213	21.0805	19.004	18.8277	21.8208	17.1932	17.5011	16.2128	19.3428	18.6603	20.2165	18.5687	20.2946	18.2143	21.4409	Signal transduction mechanisms	PREDICTED: cell division control protein 2 homolog A-like [Solanum tuberosum]
RHC12H2G2469.2.gene	17.4928	16.9143	16.9081	13.7223	11.5845	16.4466	16.5121	16.9059	16.8587	10.4108	9.64416	8.35097	15.8265	13.2224	12.544	15.2098	17.2394	15.8901	13.2928	10.667	11.4921	9.1492	12.5041	10.0652	Translation, ribosomal structure and biogenesis	PREDICTED: tryptophan--tRNA ligase, chloroplastic/mitochondrial [Solanum tuberosum]
RHC12H2G2468.2.gene	7.15248	7.09671	6.81725	6.25129	7.24748	7.17321	5.70985	5.92623	5.97652	8.00994	6.91924	5.88416	3.78296	5.72966	3.41352	6.27156	7.64367	7.6482	6.18223	6.59101	6.12582	6.65411	5.93808	7.38178	Posttranslational modification, protein turnover, chaperones	PREDICTED: uncharacterized protein LOC102599009 [Solanum tuberosum]
RHC12H2G2467.2.gene	41.7704	44.2622	37.9962	22.3447	25.6471	22.7417	37.8774	39.6646	37.8602	36.8353	35.749	32.7697	34.9178	40.8368	31.5793	24.6226	33.5041	30.2027	39.8655	38.7987	36.0747	24.1604	27.1194	28.2345	Signal transduction mechanisms	PREDICTED: uncharacterized protein LOC102599332 [Solanum tuberosum]
RHC12H2G2466.2.gene	2.74575	2.14034	2.57662	2.32407	2.50443	1.71791	2.29496	1.9101	2.41633	1.42888	1.42203	1.67927	0.881496	2.10878	1.34748	1.82345	2.77095	2.24347	1.6947	1.73187	1.78673	1.96985	2.23203	1.48182	Function unknown	PREDICTED: thioredoxin-related transmembrane protein 2 [Solanum tuberosum]
RHC12H2G2465.2.gene	1.00387	1.16597	1.21972	1.64413	1.42796	1.64587	1.09907	0.922701	0.9935	1.45115	1.55621	1.3318	0.521963	1.27242	0.48428	1.72996	1.21134	1.23806	1.74581	1.2111	1.19798	1.8822	1.75816	1.90054	Amino acid transport and metabolism	PREDICTED: protein NRT1/ PTR FAMILY 1.2 isoform X1 [Solanum tuberosum]
RHC12H2G2464.2.gene	23.0365	26.3052	29.4834	19.3049	19.6493	14.5658	17.0195	16.5545	17.4861	16.5593	11.967	13.319	15.555	16.6681	15.2334	14.819	18.3402	16.2257	22.5966	17.7167	17.7223	16.975	16.9699	18.2976	Posttranslational modification, protein turnover, chaperones	PREDICTED: chaperone protein dnaJ 10 [Solanum tuberosum]
RHC12H2G2463.2.gene	11.6408	10.7471	11.3761	6.03232	7.72096	6.6055	6.30224	6.42629	5.65222	4.48593	4.1171	4.6515	4.20206	5.39715	3.46927	5.21449	5.44152	6.07321	6.1236	5.69912	5.20311	4.85056	4.61123	5.34228	Function unknown	PREDICTED: uncharacterized protein At1g76660 [Solanum tuberosum]
RHC12H2G2462.2.gene	44.1332	48.6809	44.574	32.1057	29.7388	32.701	47.5297	41.0174	43.5855	29.1814	30.5207	29.8464	38.8768	31.2337	42.7325	46.524	43.1866	46.8613	26.3314	30.4658	30.6238	38.0652	38.165	35.086	Function unknown	PREDICTED: UPF0047 protein YjbQ [Solanum tuberosum]
RHC12H2G2461.2.gene	20.7116	21.5209	20.1126	31.5207	34.5813	33.9594	13.7386	16.2966	17.4349	16.5183	15.8078	16.325	16.1803	18.7778	12.46	21.0011	23.6181	23.802	20.9528	19.6372	20.2897	28.4633	28.7619	26.1946	Carbohydrate transport and metabolism	PREDICTED: pyrophosphate--fructose 6-phosphate 1-phosphotransferase subunit alpha [Solanum tuberosum]
RHC12H2G2460.2.gene	5.92302	4.46134	4.60343	2.4097	1.82042	3.12501	9.63775	7.40342	9.34321	4.08537	4.8685	4.44793	5.69377	4.70965	4.61994	3.83876	2.63329	3.3231	5.04902	4.275	3.8914	2.52529	2.83964	2.50445	Function unknown	PREDICTED: uncharacterized protein LOC102603805, partial [Solanum tuberosum]
RHC12H2G2458.2.gene	362.596	361.012	310.839	158.29	106.708	152.69	308.361	210.312	254.283	203.955	207.292	218.42	276.148	265.362	237.983	120.67	126.966	136.974	221.755	218.713	195.939	78.6367	47.5154	81.1136	Carbohydrate transport and metabolism	PREDICTED: glyceraldehyde-3-phosphate dehydrogenase B, chloroplastic [Solanum tuberosum]
RHC12H2G2457.2.gene	2.13321	8.5763	4.5475	4.8717	21.6142	24.58	34.4489	32.8852	3.25872	23.6306	32.1767	10.6701	0.226287	8.53504	23.3911	11.0988	24.9744	5.01617	15.8016	7.29622	26.0502	10.5653	8.3523	3.76232	Function unknown	PREDICTED: uncharacterized protein LOC102578172 [Solanum tuberosum]
RHC12H2G2456.2.gene	44.7555	12.3656	0.439084	74.7343	68.7771	70.3715	1.87609	29.107	1.05663	61.3559	58.5597	55.8046	29.2365	106.123	28.3249	56.3384	1.72654	63.0748	94.7916	109.848	120.826	7.92126	29.2883	86.6576	Inorganic ion transport and metabolism	RecName: Full=Catalase isozyme 1
RHC12H2G2455.2.gene	19.7627	24.5582	25.0141	19.2891	15.2368	11.5706	22.7656	18.5035	20.6619	16.1904	20.833	18.6503	25.4166	21.3087	19.0101	23.0518	19.7472	24.3164	20.5365	19.0931	17.5183	17.7447	19.4867	17.076	Function unknown	PREDICTED: uncharacterized protein LOC102578172 [Solanum tuberosum]
RHC12H2G2454.2.gene	575.057	570.828	523.723	248.683	208.611	230.686	457.883	398.89	448.169	341.74	329.18	342.054	445.384	406.736	389.965	218.024	238.199	231.563	349.452	352.913	340.505	99.9065	119.68	125.796	Carbohydrate transport and metabolism	PREDICTED: glyceraldehyde-3-phosphate dehydrogenase B, chloroplastic [Solanum tuberosum]
RHC12H2G2453.2.gene	0.419585	0.553346	0.434217	0.9948	0.728696	0.921976	0.3837	0.370314	0.413553	0.534872	0.346685	0.650564	0.304844	0.546973	0.338861	0.447627	0.416068	0.517379	0.630204	0.526604	0.572176	0.871206	0.78428	0.729729	Function unknown	PREDICTED: putative inactive disease susceptibility protein LOV1 [Solanum tuberosum]
RHC12H2G2452.2.gene	0.320954	0.044041	0.347617	0.15539	0.479791	1.00997	0.156607	0.004131	0.326644	0.122052	0.244448	0.219548	0.318021	0.157835	0.057738	0.342175	0.56258	0.060043	0.189081	0.13158	0.061158	0.268485	0.20468	0.470058	Function unknown	PREDICTED: probable disease resistance protein RF45 isoform X2 [Solanum tuberosum]
RHC12H2G2445.2.gene	114.233	137.063	156.167	179.047	190.915	196.686	83.0056	75.3608	78.0256	159.673	121.292	155.347	84.4498	282.768	76.7449	163.056	239.131	177.234	294.934	215.545	252.268	460.636	420.114	342.843	Inorganic ion transport and metabolism	RecName: Full=Catalase isozyme 2
RHC12H2G2442.2.gene	3.3301	4.40397	3.89707	5.01203	4.594	4.94969	3.96141	4.56121	3.84755	5.21067	4.77163	5.16284	2.27883	5.01466	2.23824	4.5818	4.68931	4.49371	5.27794	4.77801	4.50959	5.13052	6.28301	5.59783	Function unknown	PREDICTED: uncharacterized protein At1g04910-like [Solanum tuberosum]
RHC12H2G2441.2.gene	19.9707	20.101	21.4024	0.627359	0.747423	1.35922	6.80269	7.72737	6.44461	7.69402	7.65423	8.37531	4.49798	9.90498	4.65053	2.64942	1.50812	2.09267	9.3889	9.63492	9.50617	0.828223	0.892828	1.20195	Function unknown	PREDICTED: uncharacterized protein LOC102580145 [Solanum tuberosum]
RHC12H2G2436.2.gene	1.1437	1.09433	1.20295	1.88933	1.65185	1.61643	1.5432	1.31839	1.54285	1.4175	1.33416	1.83821	0.561897	1.82269	0.665236	1.94942	1.78242	1.79019	2.29369	2.35961	2.31538	2.03226	1.86364	2.13872	Function unknown	PREDICTED: uncharacterized protein LOC102580473 [Solanum tuberosum]
RHC12H2G2435.2.gene	14.9974	14.2422	16.0018	15.1442	13.6238	14.4329	8.74944	8.74764	6.87838	9.70836	8.66397	10.5151	6.24622	11.6765	7.59934	12.6387	11.4745	10.3041	13.6154	10.3263	10.2725	16.2411	15.2331	14.3092	Function unknown	PREDICTED: Werner Syndrome-like exonuclease [Solanum tuberosum]
RHC12H2G2433.2.gene	7.87463	8.50839	8.31497	20.5136	18.2857	19.3593	7.16546	5.3973	6.71214	9.86645	9.97287	9.2679	4.66669	9.30293	5.19612	17.4615	19.4312	19.8275	7.20048	8.10075	7.13237	25.1034	23.7447	23.0979	--	PREDICTED: 4-coumarate--CoA ligase-like 5 [Solanum tuberosum]
RHC12H2G2432.2.gene	12.1689	11.6085	11.2893	9.76252	7.8661	8.94172	8.75809	8.85352	8.992	13.3889	12.4444	11.491	8.1566	12.9071	7.07826	8.99143	9.14124	9.51517	11.157	13.277	15.5592	7.89907	8.77449	8.9918	Energy production and conversion	PREDICTED: alcohol dehydrogenase-like 7 isoform X1 [Solanum tuberosum]
RHC12H2G2431.2.gene	1.2083	1.6743	1.09601	4.23761	2.95197	3.00268	1.64917	1.91543	1.37611	1.82226	2.05713	3.07937	1.06673	2.12989	1.1002	2.91988	1.80035	2.34531	3.03147	1.83697	3.04827	5.01287	3.6399	4.0888	--	PREDICTED: uncharacterized protein LOC102582152 [Solanum tuberosum]
RHC12H2G2429.2.gene	4.61499	5.50797	5.23335	13.471	13.0027	12.8571	8.88173	9.69164	8.40312	14.643	11.9404	13.1234	5.67117	11.0693	5.49482	12.4874	12.6892	12.1677	12.3756	11.4113	11.9822	14.6635	13.7579	14.4701	Function unknown	PREDICTED: polyadenylation and cleavage factor homolog 4 isoform X2 [Solanum tuberosum]
RHC12H2G2428.2.gene	3.51934	3.59303	3.71316	3.43187	3.86736	3.15127	1.85682	2.03336	1.96448	2.12203	2.90206	2.44435	2.6897	2.47095	1.56707	3.39141	2.91688	3.14017	2.55595	2.10314	2.61284	3.94913	2.83374	2.77861	Function unknown	PREDICTED: uncharacterized protein LOC107059742 [Solanum tuberosum]
RHC12H2G2426.2.gene	1.30845	1.6096	1.49412	0.933771	0.851874	1.24949	0.261726	0.451217	0.365137	0.720499	0.754461	0.751507	0.273483	1.03462	0.293744	0.818566	1.32232	1.09623	0.800822	1.31508	0.963549	0.485546	0.913037	0.552403	Secondary metabolites biosynthesis, transport and catabolism	PREDICTED: L-ascorbate oxidase homolog [Solanum tuberosum]
RHC12H2G2425.2.gene	8.33682	6.68065	9.62794	6.90541	6.38877	6.00196	7.29573	6.65475	7.33074	7.47602	7.19625	7.35197	5.78029	8.77353	5.82615	9.28138	9.45988	8.32447	8.93363	8.24248	10.2787	8.50437	7.31506	6.461	Lipid transport and metabolism	PREDICTED: enoyl-CoA hydratase 2, peroxisomal [Solanum tuberosum]
RHC12H2G2424.2.gene	7.10765	8.7254	8.09623	3.66342	3.04581	2.7723	1.92355	2.23576	1.81299	2.96786	2.80523	3.38117	2.58478	2.59057	3.20054	1.23211	0.711194	0.352807	1.75098	2.28013	1.73068	0.276693	0.561285	0.700453	Function unknown	PREDICTED: high mobility group B protein 9 [Solanum tuberosum]
RHC12H2G2423.2.gene	33.8223	35.157	31.3165	34.2743	32.1435	35.6517	32.7815	32.5152	36.6788	32.0466	30.5612	32.7026	33.1214	33.0584	31.6564	31.0637	31.281	32.2333	32.719	34.8487	31.1585	29.3322	28.2711	26.2135	Cell wall/membrane/envelope biogenesis	PREDICTED: mechanosensitive ion channel protein 8-like [Solanum tuberosum]
RHC12H2G2421.2.gene	0.803734	0.628744	1.06314	0.837129	0.822025	0.888471	0.568503	0.187322	0.510989	0.632693	0.341667	0.550625	0.453705	0.233756	0.207673	0.579342	0.70904	0.600129	0.433242	0.419313	0.365841	0.971077	0.839149	0.439283	Carbohydrate transport and metabolism	PREDICTED: tetracycline resistance protein, class E-like [Solanum tuberosum]
RHC12H2G2420.2.gene	0.555376	0.552895	0.526758	0	0.480631	0	0	0.14305	0.170007	0	0.222272	0.1574	0	0.26967	0.127726	0.332182	0.175512	0	0.221494	0.173864	0.105139	0.371419	0	0	Function unknown	PREDICTED: uncharacterized protein At1g76070-like [Solanum tuberosum]
RHC12H2G2419.2.gene	2.06988	2.38581	2.59844	3.81896	3.49774	3.82877	3.67669	2.23833	2.34361	1.88214	2.63685	2.2202	2.3279	1.59662	3.89188	3.18941	4.68751	3.38516	1.17642	2.29027	2.17083	4.20724	3.71235	4.19628	Function unknown	PREDICTED: uncharacterized protein LOC102585780 [Solanum tuberosum]
RHC12H2G2418.2.gene	21.2088	18.5989	23.0648	27.1667	32.7263	29.5399	21.1337	20.0272	22.9968	25.4997	27.1918	26.9928	16.9297	30.0293	17.2821	31.3772	29.5836	25.5256	26.2606	28.0668	24.8886	28.1257	28.7524	29.579	Function unknown	uncharacterized protein LOC102586117 precursor [Solanum tuberosum]
RHC12H2G2417.2.gene	0.749778	0.971941	1.53986	1.6399	1.92208	1.48324	0.338926	0.527631	0.427353	1.53722	0.700467	1.09217	0.308652	1.10368	0.352396	1.45561	0.650777	0.898728	0.595844	1.06309	0.69773	1.50565	2.33236	1.43993	--	PREDICTED: FAD-dependent urate hydroxylase-like [Solanum tuberosum]
RHC12H2G2414.2.gene	0.795926	1.00188	0.65288	0.337066	0	0.125903	0.103098	0.107691	0.070009	0.327632	0.271824	0.18614	0.083031	0.452734	0	0	0.080434	0.210946	0.301546	0.154631	0.238151	0.040853	0	0.172172	Function unknown	PREDICTED: GDSL esterase/lipase EXL3-like [Solanum tuberosum]
RHC12H2G2413.2.gene	5.89147	6.43945	6.4297	5.30661	6.49459	6.32184	5.15301	3.76442	4.36621	7.23489	8.33729	8.4467	3.75994	7.50706	3.675	7.31591	6.86815	6.33078	7.06015	8.12894	7.76029	9.84326	7.00042	7.78766	Function unknown	PREDICTED: uncharacterized protein LOC102587124 [Solanum tuberosum]
RHC12H2G2412.2.gene	2.41437	1.72553	1.59492	5.32222	4.22907	6.17573	2.06247	3.32326	1.79753	5.206	4.444	3.63069	1.59557	3.80945	2.06345	3.40437	2.42455	2.63087	3.67718	3.06348	3.29702	4.90398	4.68227	4.79122	Intracellular trafficking, secretion, and vesicular transport	Vacuolar protein sorting-associated protein 35B [Capsicum chinense]
RHC12H2G2411.2.gene	3.98788	4.519	3.6946	3.01114	3.7896	3.5586	3.20655	3.15056	3.52761	3.82209	3.20117	4.31643	2.50944	4.10614	2.54067	3.63907	4.13082	3.83132	3.80669	3.79287	4.53479	3.42114	3.4359	3.40512	Function unknown	PREDICTED: dentin sialophosphoprotein [Solanum tuberosum]
RHC12H2G2408.2.gene	1.95506	1.45368	0.846551	2.41985	1.13109	0.630213	2.74786	2.26244	2.63929	1.42322	2.17025	1.32528	0.433928	0.850181	1.28044	3.31444	3.69341	3.41545	1.82372	0.586764	1.43983	2.16813	1.1239	1.05056	Intracellular trafficking, secretion, and vesicular transport	PREDICTED: putative HVA22-like protein g [Solanum tuberosum]
RHC12H2G2407.2.gene	0.618803	0.444056	0.273349	0.199084	0.249636	0.188396	0.655632	0.54276	1.00265	0.39773	0.529282	0.355146	0.121051	0.226157	0.43554	0.328757	0.438058	0.428437	0.392498	0.297755	0.506028	0.159055	0.218662	0.216704	Function unknown	PREDICTED: galactose oxidase-like [Solanum tuberosum]
RHC12H2G2406.2.gene	1.79541	1.51326	2.54528	2.71809	2.18637	2.16226	4.49038	4.48729	3.60139	3.66673	3.57949	4.53704	3.12225	4.04974	2.80299	6.9304	5.65006	5.38293	4.02213	2.99727	3.03936	6.0947	3.78048	3.99249	Function unknown	PREDICTED: B-box zinc finger protein 20-like [Solanum tuberosum]
RHC12H2G2404.2.gene	2.50442	2.7975	3.33907	2.6407	2.59817	2.28459	2.54333	2.84804	2.8989	1.12167	2.29967	2.27048	2.46808	1.47114	1.53161	4.06613	2.80061	2.52585	0.407301	1.38622	1.88462	1.49333	2.59726	1.78306	Intracellular trafficking, secretion, and vesicular transport	PREDICTED: uncharacterized protein LOC102590959 [Solanum tuberosum]
RHC12H2G2403.2.gene	44.3432	46.7431	43.507	150.493	140.154	134.576	57.011	55.8706	56.5653	120.418	128.883	138.432	56.013	89.6899	63.4382	184.818	162.835	154.141	81.0541	93.3559	98.0471	237.622	247.395	247.631	--	PREDICTED: bifunctional nuclease 1-like isoform X1 [Solanum tuberosum]
RHC12H2G2402.2.gene	9.96497	11.6791	10.4578	15.5515	15.171	16.7423	14.1446	11.7282	13.9139	12.5241	10.5117	8.60578	12.4584	14.5437	11.5701	21.1663	15.4291	17.2311	12.449	12.2325	14.1912	11.1916	16.1713	10.8889	Amino acid transport and metabolism	PREDICTED: ornithine carbamoyltransferase, chloroplastic-like [Solanum tuberosum]
RHC12H2G2401.2.gene	2.35759	2.50725	3.00047	3.43334	2.91489	2.07781	2.79591	2.1989	2.00598	2.02319	2.14346	1.79879	1.94753	1.62805	1.56834	2.56108	2.35439	1.78415	1.7724	2.47934	1.77488	2.99908	1.89756	1.92256	Posttranslational modification, protein turnover, chaperones	PREDICTED: proteasome subunit alpha type-1-B-like [Solanum tuberosum]
RHC12H2G2399.2.gene	11.1196	10.2213	11.7081	8.97167	9.32798	9.87472	9.93546	9.28702	9.59394	9.23897	11.9088	8.94943	8.7847	10.6213	8.87385	10.8773	11.4521	12.2397	11.0182	11.6279	12.342	10.9168	11.0867	13.1434	Carbohydrate transport and metabolism	PREDICTED: sugar transporter ERD6-like 4 [Solanum tuberosum]
RHC12H2G2396.2.gene	14.1075	13.5869	12.3241	27.2018	27.5963	25.5247	18.922	19.4798	16.7497	18.7175	19.054	17.2893	13.0583	18.2782	12.9256	18.8796	19.2	18.235	15.8816	14.7569	17.8955	30.083	31.3308	29.3755	--	PREDICTED: probable LRR receptor-like serine/threonine-protein kinase At2g16250 [Solanum tuberosum]
RHC12H2G2395.2.gene	7.66003	7.00191	7.00965	12.0313	8.5631	9.56395	8.41675	9.09569	9.22016	10.3884	9.78207	8.77082	5.86105	7.32779	8.2825	10.5825	12.2894	9.41224	10.3237	8.44617	9.90415	10.4353	11.1701	8.67363	Intracellular trafficking, secretion, and vesicular transport	PREDICTED: syntaxin-61 [Solanum tuberosum]
RHC12H2G2394.2.gene	9.8882	11.3636	10.2886	10.8138	11.2267	9.5591	11.0767	12.2027	9.44808	10.5962	11.5586	10.4629	8.35148	12.0877	8.87677	12.1708	13.6883	12.3938	10.6141	8.46778	10.5889	12.652	10.7259	11.5017	Function unknown	PREDICTED: uncharacterized protein At1g01500-like [Solanum tuberosum]
RHC12H2G2393.2.gene	0.371558	0.79417	0.502088	0.572931	0.787809	0.420673	0.484162	0.541126	0.474793	0.542288	0.448313	0.431652	0.112901	0.439144	0.213207	0.458294	0.617764	0.40885	1.0895	0.716262	0.618316	0.285698	0.770897	0.615338	Function unknown	PREDICTED: random slug protein 5-like [Solanum tuberosum]
RHC12H2G2392.2.gene	2.85164	2.64397	1.41727	1.90044	1.03885	1.99921	0.86861	1.75698	1.60186	0.591916	0.755992	0.64897	0.532314	0.754615	1.40048	1.91848	1.18555	1.41225	1.84705	1.12729	0.587565	1.19757	1.03748	2.72153	Intracellular trafficking, secretion, and vesicular transport	PREDICTED: outer envelope pore protein 24A, chloroplastic-like [Solanum tuberosum]
RHC12H2G2391.2.gene	8.61666	5.07817	8.65713	6.81029	9.09805	9.92211	9.24315	6.40329	9.5884	12.8405	9.08614	6.55054	6.74344	11.4194	6.78005	5.57826	9.19308	7.60863	11.6645	11.3134	11.8542	11.2085	10.6565	11.4694	Signal transduction mechanisms	PREDICTED: probable protein phosphatase 2C 55 [Solanum tuberosum]
RHC12H2G2387.2.gene	4.10007	4.70606	4.36585	4.44865	2.24846	3.46847	4.47549	3.58205	2.10067	3.00356	4.42441	3.54051	3.26668	4.6183	1.60417	3.40631	4.65744	3.97745	3.45088	3.2277	4.23337	4.5804	3.52164	3.5522	Function unknown	PREDICTED: deSI-like protein At4g17486 [Solanum tuberosum]
RHC12H2G2386.2.gene	13.8022	14.2394	13.4633	11.9874	13.7146	13.3897	11.4259	12.1638	12.3801	10.916	10.8494	12.2317	7.75861	12.1782	8.38842	12.1438	13.4129	14.159	14.3441	11.4368	12.398	12.1229	15.5732	11.3161	Transcription	PREDICTED: protein BRASSINAZOLE-RESISTANT 1-like [Solanum tuberosum]
RHC12H2G2385.2.gene	19.438	14.3159	18.5452	24.8423	18.2403	21.6962	17.5104	15.2495	14.8109	17.142	18.3349	22.3404	12.2076	22.7361	18.8474	17.8262	24.2346	13.6918	23.4403	13.3732	15.8266	18.3337	28.82	24.7945	Posttranslational modification, protein turnover, chaperones	PREDICTED: NEDD8-conjugating enzyme Ubc12-like [Solanum tuberosum]
RHC12H2G2383.2.gene	1.77217	1.82924	1.92451	2.46371	2.73602	2.41245	3.00162	2.61545	2.27123	2.77743	2.91567	1.75287	1.23199	2.3706	0.789583	2.16215	3.18006	2.1988	2.82983	2.49646	2.33922	3.41486	3.32863	2.69165	Posttranslational modification, protein turnover, chaperones	PREDICTED: probable E3 ubiquitin-protein ligase ARI2 [Solanum tuberosum]
RHC12H2G2382.2.gene	11.5011	12.1215	12.0761	14.9563	17.6086	14.2394	12.9832	9.90766	11.752	11.9957	15.3365	15.157	11.1443	13.8645	10.9518	14.1033	13.5967	6.54468	19.2346	14.8271	17.3008	14.7909	18.0938	13.0677	Function unknown	PREDICTED: exocyst complex component SEC3A isoform X1 [Solanum tuberosum]
RHC12H2G2381.2.gene	20.3159	20.701	22.9386	19.1934	19.7513	21.5805	16.8316	17.0107	17.3147	14.4338	14.5104	12.8417	14.2692	17.3577	14.7118	20.8553	20.082	21.6416	18.4375	16.6919	17.6948	17.4075	20.4714	19.1165	Function unknown	PREDICTED: myosin heavy chain kinase B-like [Solanum tuberosum]
RHC12H2G2379.2.gene	1.18496	1.21952	1.12989	1.65135	1.76202	2.03612	0.641617	0.912076	0.697853	1.89092	2.12788	2.0361	0.710289	1.64559	0.503683	1.52181	1.15161	0.820886	1.35108	2.27075	1.36284	2.02565	1.36844	1.12071	Signal transduction mechanisms	PREDICTED: mitogen-activated protein kinase kinase kinase YODA-like isoform X1 [Solanum tuberosum]
RHC12H2G2378.2.gene	2.87699	2.46138	3.81343	4.11842	4.1978	4.44965	3.29673	5.44958	3.35175	4.37306	5.84859	5.33318	2.83925	4.44181	2.55609	4.27209	4.09364	3.60471	5.00451	4.67035	4.13413	4.5314	4.07944	4.44643	Function unknown	PREDICTED: uncharacterized protein LOC102601564 [Solanum tuberosum]
RHC12H2G2377.2.gene	2.38411	2.43318	2.50889	15.5881	16.754	12.8593	4.32241	4.40968	3.67779	8.80895	10.7501	9.08787	3.36777	6.84284	4.23841	6.85935	6.07397	4.68275	7.63117	6.44537	8.24705	9.55477	9.49741	9.64914	Function unknown	PREDICTED: uncharacterized protein LOC102601898 [Solanum tuberosum]
RHC12H2G2376.2.gene	14.7886	17.1375	16.6996	16.403	20.2335	2.73539	16.4489	14.6206	15.0587	16.1467	18.1841	3.60621	10.712	16.1396	10.4741	14.4259	12.3745	12.0771	17.7915	16.8756	17.4997	12.0615	11.144	11.7566	Lipid transport and metabolism	PREDICTED: probable carboxylesterase 2 [Solanum tuberosum]
RHC12H2G2375.2.gene	0.396384	0.309644	0.449999	0.331066	0.30557	0.338215	0.291363	0.253349	0.158372	0.210763	0.548213	0.448881	0.078134	0.396333	0.120741	0.110003	0.299989	0.410473	0.473352	0.324188	0.183036	0.189458	0.226912	0.188801	Posttranslational modification, protein turnover, chaperones	PREDICTED: DPH4 homolog [Solanum tuberosum]
RHC12H2G2374.2.gene	11.1607	13.1726	12.5116	6.72861	6.47158	5.85086	5.60317	5.9702	6.13929	6.08786	6.7227	4.68654	5.87369	7.20985	5.8893	5.08976	5.51974	4.36039	4.81741	5.36649	6.30757	5.55894	5.41682	5.0405	Cell wall/membrane/envelope biogenesis	PREDICTED: putative dihydroflavonol-4-reductase isoform X1 [Solanum tuberosum]
RHC12H2G2373.2.gene	6.19088	6.72548	6.36241	4.37935	4.47448	3.02328	8.63458	6.8885	7.19782	7.84274	7.52061	8.41542	7.5326	9.82611	9.28092	7.35222	5.91869	6.8249	7.18031	9.97776	9.10313	6.44857	6.77109	5.71786	Signal transduction mechanisms	PREDICTED: BRI1 kinase inhibitor 1 [Solanum tuberosum]
RHC12H2G2366.2.gene	5.69391	5.17506	4.6214	6.79265	7.59083	5.29481	5.69943	5.75285	5.77321	9.85567	12.2016	12.0666	4.96998	9.77051	4.15446	7.15296	5.28582	5.04178	8.65851	7.09011	7.78412	6.2751	5.67968	5.64672	Function unknown	PREDICTED: protein WEAK CHLOROPLAST MOVEMENT UNDER BLUE LIGHT 1-like [Solanum tuberosum]
RHC12H2G2365.2.gene	1.1344	1.36737	1.16996	1.54201	0.983825	1.44004	0.94427	0.690748	0.260534	0.408347	0.625236	0.381916	0.69679	0.314344	0.864894	1.0312	1.54775	0.943727	0.372157	0.262169	0.688748	1.50844	2.41239	2.29882	Signal transduction mechanisms	PREDICTED: serine/threonine-protein kinase 38-like [Solanum tuberosum]
RHC12H2G2364.2.gene	2.84477	2.29269	2.08705	1.13418	2.24578	1.76911	1.34875	1.12274	0.696724	2.18129	2.22583	2.47401	0.91533	2.00076	0.914823	2.46222	1.69781	1.39325	2.04298	2.02233	2.42141	2.02548	2.39692	1.82933	Function unknown	PREDICTED: uncharacterized protein LOC102606264 isoform X1 [Solanum tuberosum]
RHC12H2G2363.2.gene	0.621419	0.485071	0.73874	0.48562	0.651508	0.556065	0.225878	0.339095	0.36771	0.269346	0.405536	0.080135	0.41843	0.465732	0.402613	0.383828	0.368546	0.343663	0.125125	0.135811	0.130957	0.454029	0.238212	0.454452	Function unknown	PREDICTED: uncharacterized protein LOC102578722 [Solanum tuberosum]
RHC12H2G2361.2.gene	2.21263	2.55242	2.35885	1.63859	1.71424	1.66106	1.41456	1.60896	1.83322	0.920068	0.817996	1.0409	0.858165	0.729627	0.79606	2.02569	3.25563	2.45623	0.631767	0.739849	0.568069	3.86077	3.36221	3.63998	Posttranslational modification, protein turnover, chaperones	PREDICTED: subtilisin-like protease SBT1.7 [Solanum tuberosum]
RHC12H2G2359.2.gene	42.0327	37.5648	39.777	45.0819	43.63	50.8962	29.2269	29.1223	21.659	55.1522	50.4189	49.7058	23.1559	74.6658	24.4479	50.3603	56.8827	50.4009	86.1163	72.4617	88.0634	67.2628	67.8447	71.2326	Posttranslational modification, protein turnover, chaperones	low-temperature-induced cysteine proteinase-like precursor [Solanum tuberosum]
RHC12H2G2358.2.gene	42.2152	42.2403	39.4241	85.3979	82.8124	84.7199	48.5616	53.8961	54.2026	71.444	70.9852	76.4135	39.6009	78.0927	39.8892	93.2766	100.371	89.7222	84.5542	82.0917	84.2482	115.793	114.704	114.743	Posttranslational modification, protein turnover, chaperones	PREDICTED: low-temperature-induced cysteine proteinase-like [Solanum tuberosum]
RHC12H2G2357.2.gene	10.5533	11.6502	11.7603	10.8112	9.04068	11.8451	7.87967	8.48148	7.8584	7.6575	7.5457	8.14945	6.40937	8.26658	6.99011	9.18876	9.00264	9.00068	9.29248	9.4564	8.76704	11.3122	11.1243	11.3159	Function unknown	PREDICTED: mannose-P-dolichol utilization defect 1 protein homolog 2 [Solanum tuberosum]
RHC12H2G2356.2.gene	17.5014	18.5739	21.0298	13.5101	14.366	15.5581	12.3779	12.9833	12.2403	9.29564	9.82134	9.17949	4.54496	9.99302	3.75663	12.33	12.0711	11.6661	9.28551	9.10238	10.616	13.1757	9.98627	9.64661	Cell cycle control, cell division, chromosome partitioning	PREDICTED: cyclin-D3-3-like isoform X2 [Solanum tuberosum]
RHC12H2G2351.2.gene	9.1831	9.83432	9.66529	3.60301	3.1915	3.16497	4.79753	6.16253	5.23625	3.22161	2.8419	2.95968	6.80963	4.49666	5.10078	5.2513	4.22587	4.80777	4.61114	4.57412	4.69453	3.91059	2.99695	3.58948	Cell cycle control, cell division, chromosome partitioning	PREDICTED: putative cyclin-A3-1 [Solanum tuberosum]
RHC12H2G2350.2.gene	1.51706	1.48044	1.41219	0.255987	0.610674	0.293397	0.182057	0.318334	0	0.31477	0.047729	0.151935	0.180525	0.213971	0.08626	0.268526	0.349282	0.070427	0.472726	0.467801	0.176186	0	0	0.167551	Cell cycle control, cell division, chromosome partitioning	PREDICTED: G2/mitotic-specific cyclin C13-1-like [Solanum tuberosum]
RHC12H2G2348.2.gene	1.79356	0.900664	0	0.670239	1.22793	0.385221	0.827648	0.575224	0.624699	0.722575	0	0.596074	0	0	0.507288	1.00779	0.095779	0.699667	0.55181	0.241305	0	0.433831	0.919456	0.160402	Cell cycle control, cell division, chromosome partitioning	PREDICTED: G2/mitotic-specific cyclin C13-1-like [Solanum tuberosum]
RHC12H2G2346.2.gene	0.537124	0.694468	0.254256	0.173877	0.387319	0.666565	0.183485	0.179948	0.105924	0.111375	0.141126	0.244097	0.167519	0.141614	0.352324	0	0.171818	0	0.800167	0.145438	0.133008	0.374927	0	0.166748	Cell cycle control, cell division, chromosome partitioning	PREDICTED: cell division cycle-associated 7-like protein [Solanum tuberosum]
RHC12H2G2344.2.gene	9.99653	10.4767	11.0433	12.3438	11.8255	12.0842	8.28542	9.46023	7.8197	10.8929	10.6548	9.81992	8.05017	9.71315	7.06812	10.059	9.25694	9.76876	8.94384	9.56418	10.3038	11.4153	13.1603	12.1586	Function unknown	PREDICTED: uncharacterized protein LOC102587019 isoform X1 [Solanum tuberosum]
RHC12H2G2343.2.gene	6.56905	6.46991	5.3258	12.6174	8.92108	12.0479	7.16179	6.72386	8.3601	7.49822	8.84057	7.32159	8.94963	7.93269	11.6334	10.7634	6.81521	8.02768	6.73492	9.97738	10.7733	9.55792	9.88196	9.56079	--	PREDICTED: uncharacterized protein LOC107006650 [Solanum pennellii]
RHC12H2G2342.2.gene	1.36498	1.16684	1.57055	2.13323	2.07288	1.58596	1.3621	1.31011	1.0073	1.16629	1.14472	1.28427	1.19817	1.18517	1.14868	1.81942	1.43873	1.85405	1.15122	1.32973	1.0314	1.34469	1.73232	1.47164	Function unknown	PREDICTED: protein SYM1-like [Solanum tuberosum]
RHC12H2G2339.2.gene	0.378691	0.196959	0.086924	0.36857	0.106157	0.50287	0	0.071227	0	0.018317	0.074411	0	0	0.038268	0.03892	0	0.035749	0.236748	0.162037	0.191997	0.139314	0.143938	0.108206	0.105932	Function unknown	PREDICTED: zinc finger protein ZAT10-like [Solanum tuberosum]
RHC12H2G2337.2.gene	5.58502	5.09506	5.69771	4.83488	5.20669	4.63314	6.81622	6.96011	5.25245	5.97815	6.04067	5.60215	50.7908	6.29224	45.2785	6.53126	5.10567	5.802	5.34248	5.26471	6.33356	4.57992	5.20721	4.77984	Transcription	PREDICTED: interferon-related developmental regulator 1-like [Solanum tuberosum]
RHC12H2G2336.2.gene	2.31735	1.41597	1.90735	8.18367	8.58537	8.54851	3.97069	4.11588	3.73637	6.23168	6.11291	5.91766	2.59672	5.34605	3.70186	7.96869	6.3658	7.62873	4.85184	5.17086	5.17555	12.5942	10.9601	11.4732	Function unknown	PREDICTED: U-box domain-containing protein 4-like [Solanum lycopersicum]
RHC12H2G2335.2.gene	2.56107	2.15821	2.39967	2.97768	2.4405	3.23098	1.61967	1.88837	1.38831	2.16617	1.27167	1.87306	1.36196	2.45529	1.14626	2.2031	2.33336	1.74427	1.68853	1.77246	1.98951	3.13689	2.50562	2.71926	Replication, recombination and repair	PREDICTED: DNA excision repair protein ERCC-8 [Solanum tuberosum]
RHC12H2G2334.2.gene	6.6522	5.97521	7.09479	29.1236	24.652	27.4627	7.03883	7.75763	6.20136	6.4096	7.24654	6.0737	3.7694	5.69665	3.3525	19.3169	15.7094	16.5296	5.8762	7.52202	7.45908	31.0849	33.6558	30.5166	Cytoskeleton	PREDICTED: LIM domain-containing protein WLIM1-like [Solanum tuberosum]
RHC12H2G2333.2.gene	4.92091	2.98545	4.39623	5.598	4.30265	4.27116	4.29591	4.41616	3.35013	2.9995	3.76516	5.09486	2.11624	2.69139	0.993688	2.49664	3.1936	5.16808	3.43564	2.71023	3.10369	5.6548	3.83331	4.14037	--	PREDICTED: uncharacterized protein LOC102591632 [Solanum tuberosum]
RHC12H2G2332.2.gene	3.00741	3.34667	3.74692	3.2777	1.63923	1.90229	1.64628	1.50848	1.02788	0.95045	1.87981	1.60059	0.542121	1.49054	1.68131	1.62619	1.90703	1.64537	0.79645	1.05045	1.56838	1.53802	2.00368	1.76082	Function unknown	PREDICTED: uncharacterized protein LOC102591973 [Solanum tuberosum]
RHC12H2G2331.2.gene	15.6325	15.6113	13.6889	8.55444	8.7768	9.81363	9.1173	8.27692	8.22158	9.59772	7.92309	8.82988	9.87146	9.92464	7.88584	6.46224	7.92122	7.47977	9.75027	9.81317	10.1883	8.94624	8.32215	8.22675	Function unknown	PREDICTED: cirhin-like [Solanum tuberosum]
RHC12H2G2330.2.gene	116.911	103.095	105.712	116.905	108.601	111.125	111.676	106.35	98.8771	147.829	143.85	154.004	72.7162	120.02	78.2801	117.923	96.5191	96.448	119.954	130.154	127.3	103.074	107.075	103.098	Amino acid transport and metabolism	PREDICTED: uncharacterized protein LOC101252078 [Solanum lycopersicum]
RHC12H2G2328.2.gene	8.24239	7.96307	5.418	4.41089	4.32971	4.72016	6.25188	6.19402	4.01312	8.40223	7.24537	7.83486	4.30237	8.71681	4.41834	4.3817	4.47798	4.94959	7.80897	8.08498	8.07603	5.43433	5.59893	4.46418	Function unknown	PREDICTED: CSC1-like protein RXW8 [Solanum tuberosum]
RHC12H2G2327.2.gene	2.31033	2.76465	2.16142	2.4475	2.68821	1.73098	3.66295	3.95689	3.42205	2.9842	3.46439	2.86536	1.31692	2.0484	1.58845	1.65842	1.02874	1.60811	1.66891	2.34706	1.89039	1.6122	1.14079	1.18145	Amino acid transport and metabolism	PREDICTED: branched-chain-amino-acid aminotransferase 2, chloroplastic-like [Solanum tuberosum]
RHC12H2G2325.2.gene	5.74338	5.50505	4.01469	5.63035	7.23931	7.1857	4.46764	5.24023	4.44334	7.82517	7.72902	5.80947	3.19442	7.32781	3.43516	6.26871	6.87597	6.75204	6.8652	5.849	6.81077	6.72496	7.00698	7.43647	Carbohydrate transport and metabolism	PREDICTED: endo-1,4-beta-xylanase A-like [Solanum pennellii]
RHC12H2G2324.2.gene	7.97792	10.8674	7.64574	7.53093	6.56662	5.94692	4.5948	6.71793	6.97811	12.265	13.5137	9.75011	5.35638	10.2519	6.35522	6.15305	5.8259	7.37167	8.35303	9.15044	8.97023	9.6732	6.06773	4.89517	Amino acid transport and metabolism	PREDICTED: amino acid permease 6-like isoform X1 [Solanum pennellii]
RHC12H2G2323.2.gene	15.0662	62.3987	0.229129	188.982	180.701	270.855	35.2663	16.6669	69.2093	108.581	24.9438	107.415	52.7907	36.9742	52.1816	1.65741	71.8295	90.7062	111.578	122.873	91.7111	172.043	46.2477	131.557	Cytoskeleton	PREDICTED: tubulin alpha-3 chain [Solanum pennellii]
RHC12H2G2322.2.gene	11.1422	18.2954	27.1804	4.95179	4.51034	3.60091	4.77317	4.53906	10.2898	0.946329	1.43049	9.19817	3.99088	0.246431	3.34413	27.4671	10.9768	3.77709	0.298809	0.306602	9.35711	4.0362	3.63318	15.288	Energy production and conversion	PREDICTED: phosphoenolpyruvate carboxykinase [ATP]-like [Solanum tuberosum]
RHC12H2G2319.2.gene	0.369605	0.082893	0.56338	0.565807	0.538563	0.181332	1.10878	0.497604	0.262314	0.393895	0.368294	1.21131	0.825156	1.30247	0.642325	0.409126	0	0.144589	1.20918	1.14024	0.984309	0.465571	0.498881	0.191017	Transcription	PREDICTED: MADS-box transcription factor 23-like [Solanum pennellii]
RHC12H2G2317.2.gene	0.350055	0.524141	0.204749	0.291079	0.307841	0.205166	0.29947	0.25818	0.664598	0.526313	0.355839	0.362556	0.293625	0.884542	0.297989	0.551584	0.228255	0.468202	0.139558	0.499458	0.14934	0.902539	0.466921	0.682812	Function unknown	PREDICTED: XIAP-associated factor 1-like [Solanum tuberosum]
RHC12H2G2316.2.gene	4.97248	4.23887	4.61878	10.4987	10.2621	9.6274	3.75245	3.80002	2.89568	4.81121	4.31013	4.00934	2.4883	4.85042	2.60261	6.09485	5.13034	4.80879	4.75516	4.88608	4.57939	8.42007	8.42508	8.27509	Function unknown	PREDICTED: probable rhamnogalacturonate lyase B [Solanum tuberosum]
RHC12H2G2315.2.gene	1.16542	1.04285	0.920561	2.06066	1.61864	1.68353	1.53498	1.55043	1.16726	1.4676	1.27489	1.12807	1.21887	1.01183	1.07983	1.85157	1.87569	1.91774	1.55775	1.20162	1.38062	2.00704	2.29686	2.10083	Signal transduction mechanisms	PREDICTED: wall-associated receptor kinase-like 20 [Solanum tuberosum]
RHC12H2G2314.2.gene	28.7197	32.9852	31.0721	37.4484	34.2081	31.0297	21.2343	19.0955	24.8664	23.6856	29.3279	25.5604	22.5479	23.2699	21.1475	27.2555	24.0067	21.8709	25.7074	26.24	23.5429	32.7544	29.8569	30.5264	Transcription	PREDICTED: transcription initiation factor IIA subunit 2 [Solanum tuberosum]
RHC12H2G2313.2.gene	4.4732	4.24499	4.38054	6.15644	5.23765	5.64486	4.65885	5.17501	5.69117	6.16381	5.18392	6.30237	4.12782	6.05921	4.77809	6.61974	6.32084	5.62384	6.47712	6.17858	5.14744	6.58562	5.29424	6.39036	Posttranslational modification, protein turnover, chaperones	PREDICTED: farnesylcysteine lyase [Solanum tuberosum]
RHC12H2G2310.2.gene	2.03024	2.56842	2.47295	2.58203	3.07	3.36602	1.97056	2.18888	2.23642	2.81429	2.70121	2.69426	1.27559	3.18649	2.16605	1.8914	1.73019	2.63743	3.71562	2.37243	3.30076	2.5285	2.57797	1.67281	Function unknown	PREDICTED: heterogeneous nuclear ribonucleoprotein A2 homolog 2 [Solanum lycopersicum]
RHC12H2G2309.2.gene	8.52894	7.89693	7.00134	5.92337	4.56505	4.21766	4.67056	4.30897	4.81565	4.98356	4.4902	4.32521	2.92572	4.1531	4.50996	5.96899	4.97803	5.0569	3.56191	4.68234	4.49505	4.5282	4.10464	4.64816	Function unknown	PREDICTED: protein ECERIFERUM 1 [Solanum tuberosum]
RHC12H2G2308.2.gene	6.3226	5.44822	6.15733	6.69069	7.15325	6.81477	5.98886	5.62162	5.64415	6.87611	5.78362	5.92149	4.43359	6.34241	4.12811	6.3596	5.92948	6.57645	7.0253	5.63466	5.99155	7.49327	6.70592	7.11956	Function unknown	PREDICTED: translation initiation factor IF-2-like [Solanum tuberosum]
RHC12H2G2307.2.gene	5.51367	5.59731	5.07149	9.5516	8.78006	7.73466	4.57266	5.00054	4.51189	7.63363	7.72598	7.28803	5.37206	6.91556	2.34013	4.33381	2.56543	4.25289	6.95223	7.50724	7.6893	3.58519	3.03346	4.16638	Function unknown	PREDICTED: uncharacterized protein LOC101249158 [Solanum lycopersicum]
RHC12H2G2306.2.gene	3.64849	3.13385	2.56845	2.28624	1.75087	1.98604	1.62279	2.05014	0.997001	1.69458	2.97816	1.72329	0.931017	3.26749	0.892614	2.92976	2.43784	2.42733	3.72735	3.76938	4.04739	3.35528	3.3819	2.74942	--	AT-hook motif nuclear-localized protein 28-like [Solanum tuberosum]
RHC12H2G2305.2.gene	8.89077	9.92482	10.6517	33.7333	36.2941	37.5211	10.7769	8.84831	10.02	13.2543	12.1226	13.1513	3.47206	13.764	3.09235	35.7136	34.8793	35.6445	11.4786	11.3593	12.1354	26.4249	22.0609	26.4892	Posttranslational modification, protein turnover, chaperones	PREDICTED: protein ASPARTIC PROTEASE IN GUARD CELL 2-like [Solanum tuberosum]
RHC12H2G2304.2.gene	1.3718	1.51058	2.001	1.59431	2.06595	2.17075	0.31491	0.239095	0.264611	0.87001	1.34903	0.809626	0.38149	0.811705	0.444075	0.489452	1.18008	0.700202	0.739629	0.923035	1.20598	1.54144	1.56148	1.33827	--	PREDICTED: putative receptor-like protein kinase At4g00960 [Solanum tuberosum]
RHC12H2G2302.2.gene	37.5732	37.4515	39.1515	32.9584	42.9614	36.6084	30.115	59.1787	50.5921	37.5181	35.5566	34.9538	19.8128	34.7392	21.099	24.9038	25.9401	48.6106	36.3645	34.7292	34.4326	26.9065	25.9848	26.4934	Transcription	PREDICTED: transcription factor bHLH145-like [Solanum tuberosum]
RHC12H2G2301.2.gene	2.66904	6.26316	5.91707	4.97539	1.25096	2.89861	2.83872	3.62709	1.70133	3.14664	3.38984	2.38892	0.89544	2.38573	1.72609	4.23421	5.40447	4.78313	3.53396	0.280057	3.36723	4.6521	4.6585	4.15731	--	PREDICTED: purine permease 3-like [Solanum tuberosum]
RHC12H2G2300.2.gene	40.8214	38.6788	52.4155	13.0989	11.8317	10.7008	18.2416	18.1155	16.3557	14.4145	17.0731	13.9008	11.0349	14.3468	12.2579	14.8477	22.2001	19.7478	22.7864	15.0732	13.3925	14.0163	12.4741	13.0309	--	PREDICTED: purine permease 3-like [Solanum tuberosum]
RHC12H2G2299.2.gene	0.505172	0.568665	1.07435	0.807976	0.70996	0.637749	0.592411	0.285846	0.848371	0.921094	0.801678	1.03504	0.318738	0.652325	0.241579	1.02594	0.758136	1.27408	1.70377	0.619221	0.70101	0.880825	1.23196	0.66506	Posttranslational modification, protein turnover, chaperones	PREDICTED: E3 ubiquitin-protein ligase ATL6-like [Solanum tuberosum]
RHC12H2G2297.2.gene	0.653516	0.530929	0.791788	0.272427	0.184027	0.356356	0.439143	0.453806	0.443427	0.651987	0.677597	0.559263	0.123173	0.613667	0.54697	0.107545	0.430949	0.338722	0.705956	0.621985	0.717545	0.578058	0.044738	0.1361	Posttranslational modification, protein turnover, chaperones	PREDICTED: RING-H2 finger protein ATL54 [Solanum tuberosum]
RHC12H2G2296.2.gene	1.24702	0.885854	1.37025	0.494671	0.279382	0.200152	0.893184	0.807033	0.969225	0.627338	1.19708	0.7088	0.631138	0.726708	0.805086	0.688728	0.40622	0.759025	1.48688	1.23496	0.653342	0.420475	0.661804	0.668762	--	PREDICTED: uncharacterized protein LOC107060084 [Solanum tuberosum]
RHC12H2G2295.2.gene	11.7516	11.8073	12.2209	17.9073	15.6964	15.1366	26.3079	25.1286	23.2517	25.5179	31.795	25.0906	27.8059	24.8578	32.5559	24.6916	18.8938	21.5812	27.0682	27.1002	27.1243	17.0273	15.9394	14.8837	Transcription	PREDICTED: protein MADS AFFECTING FLOWERING 5-like isoform X1 [Solanum tuberosum]
RHC12H2G2292.2.gene	2.74609	2.72509	2.44988	0.776686	1.62797	1.22033	0.8868	0.645797	0.532492	1.34011	0.424598	1.13692	1.50947	1.28006	0.997129	0.476722	0.548045	1.82259	1.45363	1.48676	1.35096	1.13805	1.95148	0.810524	--	--
RHC12H2G2291.2.gene	1.40901	1.1068	2.10693	2.0193	1.39466	2.22867	1.45583	2.0294	1.85376	1.50097	2.07681	1.42474	1.58906	1.14864	1.20289	0.783398	0.886165	0.386535	2.06481	3.08813	1.71593	1.15123	0.975929	0.622733	--	--
RHC12H2G2290.2.gene	0.660905	1.58552	1.4759	1.03985	1.22305	1.78529	1.22522	1.0481	1.47034	1.43365	0.914599	1.42314	0.810077	0.984752	0.963437	1.55161	1.11584	0.680693	0.942153	1.23287	2.17718	2.08056	1.06674	2.44158	--	--
RHC12H2G2289.2.gene	4.49704	3.86658	3.3502	2.572	3.49121	2.65911	2.85794	2.95664	3.19554	1.64206	3.79781	3.7859	4.43208	3.82065	3.85699	3.66555	3.61335	4.07791	4.29695	3.49604	4.16012	2.93828	2.79997	2.78914	--	--
RHC12H2G2288.2.gene	13.3651	11.4776	13.2702	8.41604	9.38588	10.1818	3.63043	4.11966	4.91469	6.17726	6.84439	7.05411	4.27216	7.92079	7.51595	7.90738	6.93894	8.31596	8.54218	9.317	7.67264	9.06499	8.21157	8.27377	--	--
RHC12H2G2286.2.gene	0.273303	0.055606	0.197601	0.092048	0.190821	0.061618	0.170345	0.114363	0.041999	0.172411	0.062575	0.127107	0.097745	0	0.028482	0	0.033971	0.047612	0.032456	0	0	0	0.114143	0	Function unknown	PREDICTED: uncharacterized protein At1g04910-like [Solanum tuberosum]
RHC12H2G2285.2.gene	7.60567	9.07049	8.82156	10.5764	11.8784	10.4272	27.8144	24.8288	26.1473	23.9704	24.1195	26.8974	27.9895	20.4485	29.6833	21.0229	21.4884	21.2861	23.352	19.0214	21.6544	12.2261	10.2887	11.8734	Posttranslational modification, protein turnover, chaperones	PREDICTED: cytochrome c oxidase subunit 6b-1-like [Solanum tuberosum]
RHC12H2G2284.2.gene	46.8316	49.6241	52.8786	36.6199	40.9588	43.3496	42.6278	43.0351	37.7998	32.7377	34.9512	36.9964	35.2056	46.5617	32.6857	52.2871	52.4557	51.5466	44.185	40.9095	44.0477	57.0258	57.7379	54.4727	Signal transduction mechanisms	14-3-3 protein 2-like [Solanum tuberosum]
RHC12H2G2283.2.gene	2.40328	2.35523	2.33993	3.23598	4.1931	3.55768	2.92206	3.2479	2.02987	4.15271	4.28483	6.01989	2.7388	4.33174	2.83461	2.75298	3.37706	2.01891	4.72271	4.77558	4.58648	3.55086	3.68118	3.65798	Signal transduction mechanisms	serine/threonine-protein kinase SAPK1-like [Solanum tuberosum]
RHC12H2G2282.2.gene	0.712112	0.556093	0.605593	0.769117	0.474128	0.664857	0.330106	0.608191	0.956769	0.444681	0.888837	0.561405	0.368398	1.1118	0.278492	0.76115	0.378636	0.886049	0.602319	0.528172	0.735121	0.753024	0.755541	0.802798	--	PREDICTED: purine permease 3-like [Solanum tuberosum]
RHC12H2G2281.2.gene	0.355078	0.114458	0.283262	0.471463	0.45214	0.344278	0.172849	0.076028	0.222319	0.143372	0.188093	0.316743	0.129416	0.257768	0.05984	0.055327	0.124181	0.288144	0.541899	0.444853	0.650495	0.620525	0.129608	0.418038	--	PREDICTED: purine permease 3-like [Solanum tuberosum]
RHC12H2G2280.2.gene	4.46514	4.74213	0.252402	6.89438	7.48625	2.7044	0.537923	3.67663	0.347845	4.28362	5.41344	4.12073	0	0.436978	1.36969	5.66072	0.307684	5.20002	1.24354	1.466	3.91375	4.67997	4.82235	5.88626	--	--
RHC12H2G2279.2.gene	37.3985	33.3164	35.5095	20.0078	20.41	18.9931	40.145	37.5295	42.7361	38.0957	37.3087	39.4608	24.4116	47.1599	26.8605	31.1556	29.3907	29.7253	41.1951	50.5607	51.2654	18.9551	17.8656	17.909	Function unknown	PREDICTED: 7-deoxyloganetin glucosyltransferase-like [Solanum tuberosum]
RHC12H2G2277.2.gene	0.272912	0.186994	0.300029	0.356901	0.255292	0.162514	0	0.095443	0.198928	0.083494	0.039584	0.195656	0.186002	0.241461	0	0.265074	0.065114	0.124946	0.084915	0.02642	0.166699	0.320773	0	0	--	PREDICTED: purine permease 1-like [Solanum tuberosum]
RHC12H2G2276.2.gene	0.453339	0.784384	0.457017	1.34476	0.770014	0.323087	0.786498	0.609948	0.323388	0.629434	0.707173	0.485422	0.195938	0.115331	0.199337	0.080394	1.0782	0.211054	0.320496	0.473389	0.259992	0.968681	0.279593	0.475188	--	PREDICTED: purine permease 3-like [Solanum tuberosum]
RHC12H2G2275.2.gene	0.474238	0.302003	0.44294	0.397428	0.666119	0.889616	0.189058	0.573238	0.369918	0.401351	0.674779	0.692424	0.257031	0.659684	0.391511	0.5149	0.504919	0.484449	0.800652	0.388538	0.724979	0.795401	0.317672	0.719512	--	PREDICTED: purine permease 1-like [Solanum tuberosum]
RHC12H2G2273.2.gene	0.509192	0.314557	0.604287	0.619614	0.471774	0.423849	0.700074	0.152482	0.036596	0.464552	0.569284	0.182071	0	0.540506	0.043949	0.648718	0.247292	0.273112	0.534721	0.453166	0.485521	0.459474	0.197409	0.494517	--	PREDICTED: purine permease 1-like [Solanum tuberosum]
RHC12H2G2272.2.gene	13.4012	13.9316	14.2049	10.8198	12.3249	10.9011	20.7979	19.7782	21.7952	12.3537	12.936	13.5609	12.6403	14.0724	10.7995	23.471	24.4813	25.5005	14.7709	15.4474	14.9707	15.9347	17.8825	17.7929	Function unknown	PREDICTED: 7-deoxyloganetin glucosyltransferase-like [Solanum tuberosum]
RHC12H2G2269.2.gene	0.468608	0.468255	0.737565	0.6379	0.419506	0.727131	0.483059	0.313879	0.409656	0.309842	0.645783	0.535973	0.41006	0.567651	0.230581	0.580305	0.465827	0.572841	0.218898	0.40458	0.552249	0.470028	1.08115	0.867105	--	PREDICTED: purine permease 3-like [Solanum tuberosum]
RHC12H2G2266.2.gene	6.67895	7.76616	6.76438	7.7056	9.16609	9.73978	12.7977	12.4633	13.1981	8.53026	8.47729	9.09302	8.8651	9.37984	7.59006	18.6126	17.9331	18.7178	8.87674	10.8269	9.4268	12.4159	12.4503	12.2035	Function unknown	PREDICTED: 7-deoxyloganetin glucosyltransferase-like [Solanum tuberosum]
RHC12H2G2264.2.gene	2.13777	2.04623	3.19164	17.514	18.1603	17.5582	2.87653	2.4482	2.53551	4.16756	5.51216	2.85473	1.73601	4.8071	3.02638	8.34803	10.0585	10.8502	3.14899	4.82108	5.27837	27.7395	27.5738	31.8542	Function unknown	PREDICTED: 7-deoxyloganetin glucosyltransferase-like [Solanum pennellii]
RHC12H2G2262.2.gene	2.28422	1.42902	2.60686	1.46888	1.45057	2.37001	3.76683	2.46519	2.62935	1.42621	1.75976	2.33942	1.84339	1.39668	2.09862	3.27995	2.90329	3.92043	2.58813	2.16724	1.7796	2.79467	3.07218	2.22906	Function unknown	PREDICTED: 7-deoxyloganetin glucosyltransferase-like [Solanum tuberosum]
RHC12H2G2261.2.gene	1.80669	1.97495	1.55026	17.6703	16.8761	14.8096	2.30656	2.34169	2.57314	3.45937	3.04161	3.74246	2.74695	2.91924	2.77172	9.93701	9.94207	7.43732	2.95811	3.3338	2.77834	23.2993	22.0403	22.851	Function unknown	PREDICTED: 7-deoxyloganetin glucosyltransferase-like [Solanum pennellii]
RHC12H2G2259.2.gene	26.0665	24.0858	23.9717	12.5074	13.4289	11.9907	37.984	37.0794	36.8005	29.288	29.1348	30.7095	25.9241	33.0923	26.8514	22.4206	25.5643	22.8591	26.3938	33.1981	33.0536	12.102	14.0157	13.5323	Replication, recombination and repair	PREDICTED: cryptochrome-1-like [Solanum tuberosum]
RHC12H2G2258.2.gene	6.0158	4.37301	6.81125	3.80192	3.79944	3.10884	5.79109	8.22855	6.12755	4.24937	6.63325	5.93257	3.65472	7.57891	2.79816	7.14443	3.76187	4.77312	4.89625	5.26095	4.83883	4.54022	4.95725	4.6099	Function unknown	PREDICTED: uncharacterized protein LOC102583469 [Solanum tuberosum]
RHC12H2G2257.2.gene	0.282989	0.408206	0.239527	0.255756	0.045829	0.089073	0	0.210909	0.055508	0.232538	0.056648	0	0	0.178705	0.182715	0.055452	0.064511	0.045252	0.194528	0.223534	0.054646	0.262649	0.073795	0.373907	Function unknown	PREDICTED: probable carbohydrate esterase At4g34215 [Solanum tuberosum]
RHC12H2G2255.2.gene	3.74054	3.84879	4.21057	4.25032	4.32932	4.39069	3.05385	3.00639	2.54	2.51832	2.34201	2.06302	2.04686	2.22311	2.40806	3.14269	2.87139	4.18796	3.24541	2.50007	2.38616	3.69298	3.08525	3.45412	Function unknown	PREDICTED: VQ motif-containing protein 22-like [Solanum tuberosum]
RHC12H2G2254.2.gene	1.51452	1.1502	1.39765	1.54468	1.20328	1.17891	0.873249	1.01234	0.76839	1.21908	0.905278	0.790415	0.510261	0.923693	0.64888	1.03327	1.11197	1.20943	0.989009	1.09906	1.49961	1.34	1.68234	1.27877	Function unknown	PREDICTED: inactive TPR repeat-containing thioredoxin TTL3-like [Nicotiana tomentosiformis]
RHC12H2G2253.2.gene	0.786152	0.572008	0.478817	0.401365	0.270906	0.164555	1.33851	0.542811	0	0	0.536107	0.450798	0.10037	0.464281	0.567689	0.240117	0.897513	0.61173	0.394387	0.094202	0.160987	0.198053	1.0476	0.490225	--	PREDICTED: agamous-like MADS-box protein AGL80 [Solanum tuberosum]
RHC12H2G2252.2.gene	0.644968	0.583652	0.816756	0.414396	0.506186	0.460561	0.556593	0.631399	0.215912	0.396442	0.63214	0	0.543212	0.375953	0.310085	0.7095	0.379618	0.566388	0.458554	0.478749	0.302291	0.662286	0.887958	0.509649	Transcription	PREDICTED: agamous-like MADS-box protein AGL80 [Solanum pennellii]
RHC12H2G2251.2.gene	2.52386	2.94892	3.40269	3.93771	3.88711	4.09789	3.12175	2.79705	3.15848	3.87148	4.07639	4.14929	2.38061	4.32818	3.069	3.41763	3.65099	2.86062	3.72132	4.28371	4.66964	3.41715	2.55796	3.06158	--	PREDICTED: uncharacterized protein LOC102585002 [Solanum tuberosum]
RHC12H2G2250.2.gene	16.4439	16.7593	18.8324	14.4499	14.4566	13.406	23.3222	22.0892	19.1136	21.4286	22.2582	21.3843	16.7942	23.2817	16.4946	22.6452	17.7691	18.9367	23.557	24.2293	25.8088	20.3798	19.9353	19.0302	Transcription	PREDICTED: ethylene-responsive transcription factor RAP2-13 [Solanum tuberosum]
RHC12H2G2249.2.gene	3.93011	4.44733	4.37129	4.41894	5.61308	4.54898	4.16226	3.43181	4.40859	5.19621	4.7973	5.39495	2.46827	7.35836	2.96862	5.49117	5.42226	5.62494	8.06455	7.20348	7.01431	6.1888	6.88437	6.42349	Carbohydrate transport and metabolism	PREDICTED: glucan 1,3-beta-glucosidase-like [Solanum tuberosum]
RHC12H2G2248.2.gene	19.637	18.5151	16.6724	18.6008	18.1644	19.0948	16.8503	18.5992	15.1744	16.9694	14.0505	16.5686	12.5992	13.6104	13.0127	17.6628	19.438	19.3745	13.1172	14.1932	15.1268	21.0039	21.7399	21.3241	Lipid transport and metabolism	PREDICTED: acetyl-CoA carboxylase 1 [Solanum tuberosum]
RHC12H2G2247.2.gene	9.01799	8.84974	8.87513	8.60002	8.17995	7.55123	5.94563	5.94289	6.4447	8.05978	7.5701	7.47959	4.2384	8.21525	4.19123	5.46548	6.80373	7.27186	8.67509	8.19365	7.6804	7.24494	6.36242	6.21875	Inorganic ion transport and metabolism	PREDICTED: sulfate transporter 1.2-like [Solanum tuberosum]
RHC12H2G2245.2.gene	4.13227	4.17808	5.75395	5.55323	3.98792	5.69721	3.51565	2.52484	4.55679	3.54666	6.34162	3.88337	2.4214	2.7268	3.95858	5.19143	2.85924	3.96876	2.16277	3.42542	3.91687	3.76142	5.05943	4.6982	Function unknown	PREDICTED: uncharacterized protein LOC102587214 [Solanum tuberosum]
RHC12H2G2242.2.gene	1.45877	2.32426	1.15612	30.8769	31.2711	24.8689	1.18602	0.819726	1.06904	9.802	8.18425	8.8429	1.04276	6.25563	1.51062	5.23528	5.35669	6.68125	15.4881	8.50299	5.87364	21.0532	19.0859	18.8679	--	PREDICTED: miraculin-like [Solanum tuberosum]
RHC12H2G2240.2.gene	22.7033	22.8957	24.1309	20.8539	18.9183	21.8717	11.5143	11.9663	12.5024	16.1065	15.8584	16.3514	8.5364	14.636	9.0201	16.1528	21.6184	19.9275	18.5638	13.2606	15.3379	22.0646	20.5133	22.8554	Transcription	PREDICTED: transcription factor TGA1 [Solanum pennellii]
RHC12H2G2239.2.gene	25.884	23.4311	27.4875	17.1319	18.1108	16.3321	28.0152	29.6611	29.1998	32.3935	31.9614	34.0928	21.3773	31.486	26.3169	25.9457	24.0399	26.2521	27.8956	31.379	36.2304	22.21	20.7816	21.3494	Posttranslational modification, protein turnover, chaperones	PREDICTED: pre-mRNA-splicing factor cwf23 [Solanum tuberosum]
RHC12H2G2238.2.gene	6.55895	6.45479	4.41769	3.70729	5.79412	3.83112	3.90795	2.75151	2.31635	6.76446	5.43214	3.88442	2.44395	4.43619	2.36773	5.06974	3.16213	4.07556	4.53481	3.99325	4.30081	4.20579	4.02335	3.76742	Coenzyme transport and metabolism	PREDICTED: phosphopantothenate--cysteine ligase 2-like [Solanum pennellii]
RHC12H2G2237.2.gene	686.241	671.72	681.384	376.167	390.891	390.419	607.344	506.33	671.239	283.301	283.633	313.684	517.006	287.772	569.994	387.77	377.79	391.11	280.999	311.415	296.359	344.963	333.13	340.258	Energy production and conversion	PREDICTED: ATP synthase delta chain, chloroplastic [Solanum tuberosum]
RHC12H2G2234.2.gene	69.6811	66.9678	66.0158	29.9525	31.2512	31.5222	57.5254	58.5537	61.3462	45.3694	46.8708	50.523	61.9089	45.307	57.3136	48.592	50.3336	50.5409	42.9138	50.0385	46.3333	35.4063	36.9299	37.0894	Function unknown	PREDICTED: uncharacterized oxidoreductase At4g09670 [Solanum tuberosum]
RHC12H2G2233.2.gene	3.39937	3.15489	3.4601	2.89845	3.17513	3.19052	2.81025	2.93617	2.30297	3.18694	3.51686	3.04773	2.32578	3.85531	2.70996	2.32195	2.5258	2.87717	3.82294	2.9731	3.38654	2.90439	3.15565	2.80858	Function unknown	PREDICTED: NAC domain-containing protein 17-like [Solanum tuberosum]
RHC12H2G2232.2.gene	9.16408	10.6954	9.52948	25.413	27.4048	28.394	30.359	31.9949	35.5396	21.3327	24.2228	24.9356	38.463	26.7568	36.1043	24.8434	24.0563	25.2835	26.7273	26.5685	24.8877	19.4139	20.0153	20.7551	Function unknown	PREDICTED: uncharacterized protein Os08g0359500-like isoform X1 [Solanum tuberosum]
RHC12H2G2231.2.gene	15.7494	15.2215	15.7183	19.4259	17.0965	17.3622	17.5534	17.6077	14.0055	18.7688	20.8684	17.5618	13.2344	16.5068	15.0503	19.4617	19.3612	17.5699	14.5949	18.8688	17.5242	20.1733	23.5818	20.091	Posttranslational modification, protein turnover, chaperones	PREDICTED: probable F-actin-capping protein subunit beta [Solanum tuberosum]
RHC12H2G2230.2.gene	0.94763	0.98831	2.20428	2.58132	2.59348	1.90859	1.65651	1.23258	1.26094	2.65656	2.11847	2.39417	1.54339	1.56688	0.73533	1.99644	2.59817	1.62145	1.3855	1.8791	1.73813	3.34927	2.62802	2.07541	Function unknown	PREDICTED: uncharacterized protein LOC107006051 [Solanum pennellii]
RHC12H2G2228.2.gene	4.32534	2.51106	1.85711	4.28431	3.2836	3.86973	3.46605	2.32541	2.11278	2.13879	1.81617	3.21394	1.96827	5.23327	1.89997	3.95605	2.30717	4.15302	1.83319	3.14518	2.19196	3.05155	3.6175	4.17866	Replication, recombination and repair	PREDICTED: DEAD-box ATP-dependent RNA helicase 39 [Solanum lycopersicum]
RHC12H2G2224.2.gene	1.01689	0.649091	0.945556	2.30219	0.945429	0.697019	0.961933	1.36495	1.00525	0.165071	0.416856	0.577784	0.718718	0.614262	0.644263	0.911717	1.2305	1.00855	0.275381	0.280782	0.790553	1.80576	0.901031	2.26811	Function unknown	PREDICTED: secoisolariciresinol dehydrogenase-like [Solanum tuberosum]
RHC12H2G2223.2.gene	4.59604	5.07899	1.75937	7.84248	3.73519	3.30976	0	0	2.12534	2.28543	4.67093	1.03996	3.89366	5.22327	4.74359	0.506967	2.04148	3.00295	7.61889	0.040691	3.01256	0.851299	2.21494	7.20923	Lipid transport and metabolism	PREDICTED: probable carboxylesterase 120 [Solanum tuberosum]
RHC12H2G2221.2.gene	1.24581	1.18758	1.01011	5.80183	5.03261	4.4237	1.55528	1.73257	1.68728	2.34249	2.82946	1.93166	2.08962	1.83131	0.808409	3.02596	3.24269	3.08961	2.7878	2.64685	2.11541	3.88748	4.20348	3.4467	Function unknown	PREDICTED: S-adenosylmethionine carrier 1, chloroplastic/mitochondrial-like isoform X1 [Solanum tuberosum]
RHC12H2G2219.2.gene	1.21313	1.02369	1.03643	5.1755	6.23563	6.59207	1.37238	2.04189	1.07747	5.53137	4.64116	6.03216	1.76205	5.4246	1.33707	4.01564	3.98745	4.25716	4.46952	4.58848	6.03643	11.0916	11.3981	10.326	Function unknown	PREDICTED: protein GIGANTEA-like isoform X1 [Solanum tuberosum]
RHC12H2G2218.2.gene	6.80179	5.55291	5.07322	3.88254	3.62011	3.05118	3.22581	2.97786	3.22826	1.98975	1.50853	3.3165	3.98392	2.37382	2.83134	3.49733	2.47708	3.63241	2.83554	2.37486	2.2761	4.09195	4.21409	3.45991	Function unknown	PREDICTED: UDP-galactose transporter 2-like [Solanum tuberosum]
RHC12H2G2216.2.gene	10.7671	12.9204	9.84247	11.0327	10.5361	11.9888	9.41911	10.0471	8.19499	10.9395	8.5577	11.1918	7.75136	9.92845	10.0696	10.9036	10.7272	10.3398	12.8007	7.72814	9.03137	10.3265	10.1931	13.2656	Function unknown	PREDICTED: uncharacterized protein LOC102606378 [Solanum tuberosum]
RHC12H2G2214.2.gene	5.70822	4.91043	6.6015	0.849772	0.813347	0.448501	2.88885	2.45241	2.65201	1.97387	2.10936	1.58313	2.72354	1.02497	2.53738	1.09755	1.76724	0.869664	1.24406	3.04176	1.24184	0.578015	0.880711	0.517412	Function unknown	PREDICTED: uncharacterized protein LOC102606038 [Solanum tuberosum]
RHC12H2G2213.2.gene	0.594156	0.273106	0.448478	0	0	0.059303	0.256646	0.146832	0.166061	0	0	0	0.165549	0	0.218507	0.055255	0.192847	0.073172	0	0.055732	0.063612	0.087751	0	0.085019	Function unknown	PREDICTED: secoisolariciresinol dehydrogenase-like [Solanum tuberosum]
RHC12H2G2212.2.gene	0.305146	0.341907	0.592733	0.306597	0.375326	0.087101	0.112892	0	0.264518	0.512957	0.497479	0.268623	0.05577	0.430479	0	0.296672	0.324787	0.122005	0.250181	0.376902	0.769035	0	0	0	Function unknown	PREDICTED: secoisolariciresinol dehydrogenase-like [Solanum tuberosum]
RHC12H2G2207.2.gene	27.4368	25.2735	22.643	24.3892	24.5101	24.502	22.4371	20.9769	22.61	22.9055	20.928	21.4154	23.5868	24.8241	22.2155	23.3292	22.9953	22.7894	21.845	20.2189	19.5104	19.0528	19.9712	21.4423	Cell wall/membrane/envelope biogenesis	PREDICTED: cellulose synthase A catalytic subunit 2 [UDP-forming] [Solanum tuberosum]
RHC12H2G2205.2.gene	0.493111	0.877111	0	0.547814	0.463829	0.233117	0.131365	0.296484	0.371994	0.386985	0.803582	0.672276	0.270693	0	0.482886	0.538837	0.217532	0.683321	0.818337	0.574993	0.320153	0.313545	0.206535	0.466353	Posttranslational modification, protein turnover, chaperones	PREDICTED: uncharacterized protein LOC102600776 [Solanum tuberosum]
RHC12H2G2204.2.gene	2.7489	2.0977	2.66331	1.44789	2.21568	1.84327	2.12364	1.36315	1.9244	2.98672	3.29129	2.45553	1.96477	2.8884	2.15916	1.4936	1.60953	2.03226	2.13388	2.79384	3.41698	1.81105	1.83593	1.84714	Function unknown	PREDICTED: uncharacterized protein LOC102600454 [Solanum tuberosum]
RHC12H2G2203.2.gene	3.07517	2.17091	1.94607	0.272558	0.291773	0.172727	0.054136	0.074566	0.247833	0.051074	0.169179	0.127193	0.053148	0.151096	0	0.277709	0.091741	0.153198	0.13004	0	0.152325	0.092854	0.051463	0.120516	Chromatin structure and dynamics	histone H3 [Zostera marina]
RHC12H2G2201.2.gene	29.3892	22.848	30.1885	20.1312	19.1271	13.2805	17.8	22.8211	17.8632	24.706	23.0825	20.5186	20.0039	24.2564	18.299	18.6501	22.0112	21.0772	23.4344	25.1542	24.2318	24.1751	27.6103	25.9311	Carbohydrate transport and metabolism	PREDICTED: fructose-1,6-bisphosphatase, cytosolic-like [Solanum tuberosum]
RHC12H2G2200.2.gene	0.464673	0.31385	0.526636	0.77098	0.739895	0.644496	0.236144	0.094281	0.2162	0.426276	0.620494	0.487424	0.125124	0.355193	0.198502	0.26122	0.720309	0.371955	0.411864	0.539894	0.334771	0.606803	0.646555	0.651617	Function unknown	PREDICTED: exocyst complex component SEC5A-like [Solanum tuberosum]
RHC12H2G2199.2.gene	11.2797	12.1567	11.3829	11.1568	12.1595	11.5371	9.78065	10.1206	8.99516	11.1077	9.74219	11.9231	7.11381	12.125	7.68919	10.217	9.08544	8.84005	11.3559	10.9057	11.8293	10.6812	11.8302	10.6489	Transcription	PREDICTED: trihelix transcription factor GT-2-like isoform X4 [Solanum tuberosum]
RHC12H2G2197.2.gene	2.06652	1.52103	1.63074	3.02575	2.88046	3.00146	2.46349	2.63513	2.87432	3.60979	2.90807	3.30501	7.02686	3.09397	5.98902	2.4333	3.24213	3.40816	3.4565	2.76811	2.8312	2.49816	2.80864	2.31908	Function unknown	PREDICTED: protein FIZZY-RELATED 2-like [Solanum tuberosum]
RHC12H2G2196.2.gene	1.05512	0.516881	0.6859	5.36273	4.87065	5.65073	0.030567	0	0.645609	1.6072	2.05199	1.28729	0.563053	0.93386	0.355687	3.84542	2.26531	2.87244	1.1281	0.957389	0.541064	9.45423	10.1114	11.8107	Function unknown	PREDICTED: protein STAY-GREEN, chloroplastic-like isoform X3 [Solanum tuberosum]
RHC12H2G2192.2.gene	0.553328	0.461522	0.211997	0.786043	1.09409	1.02448	0.082399	0.350085	0.05743	0.765137	0.58893	0.238227	0.101749	1.0029	0.270379	1.05339	0.890656	0.449243	0.611233	0.551447	0.915356	1.72529	1.14573	1.95826	Lipid transport and metabolism	PREDICTED: hydroxymethylglutaryl-CoA synthase-like [Solanum tuberosum]
RHC12H2G2189.2.gene	4.80032	3.46859	3.27014	11.0496	11.7417	9.67196	4.13199	4.21903	2.66769	6.47823	8.31114	6.29972	3.14788	7.48187	3.05253	7.10288	7.42141	6.44951	8.79284	6.39874	8.11267	12.0722	11.3714	9.85753	Signal transduction mechanisms	PREDICTED: SPX domain-containing membrane protein At4g22990-like isoform X2 [Solanum tuberosum]
RHC12H2G2186.2.gene	6.08217	7.60698	7.41094	10.1474	11.0985	10.5586	12.2595	9.84201	9.94484	7.91779	10.3928	7.67533	8.00306	8.21466	8.05284	21.2884	20.817	24.0039	9.97787	8.70858	11.5597	27.5078	30.0222	28.9181	Function unknown	PREDICTED: F-box protein PP2-A13-like [Solanum tuberosum]
RHC12H2G2184.2.gene	5.02069	4.44907	5.02392	6.60028	4.91048	5.55066	5.47386	4.5593	4.12885	3.04683	4.03502	3.20345	2.95627	4.60869	2.73489	7.06861	6.69125	7.92248	4.27802	3.97019	3.81376	8.12741	8.81566	9.97022	Posttranslational modification, protein turnover, chaperones	PREDICTED: E3 ubiquitin-protein ligase At1g63170-like [Solanum tuberosum]
RHC12H2G2183.2.gene	1.86227	1.68457	1.54449	6.53181	6.37818	7.79607	1.89575	1.53467	1.92898	3.49051	2.97502	4.65549	0.734338	11.2313	1.58276	2.71996	3.29167	1.83282	11.1139	11.3326	12.4639	7.06183	4.38478	6.23148	Function unknown	thaumatin-like protein [Manihot esculenta]
RHC12H2G2179.2.gene	2.40654	2.26037	2.43678	0.446985	1.28226	0.625826	1.09559	0.781265	0.555323	0.634604	0.523659	0.538623	0.846734	0.575309	0.899688	0.899784	0.764036	0.894423	0.776671	0.887128	0.384294	0.545647	1.01412	0.935037	Function unknown	PREDICTED: uncharacterized protein LOC102592658 [Solanum tuberosum]
RHC12H2G2178.2.gene	1.24284	1.35262	1.21557	3.96445	4.10994	4.27349	0.865056	1.09258	0.65056	2.08438	2.25643	2.11257	0.655239	2.74167	0.511769	1.67891	1.52565	1.40163	2.0672	2.87663	2.69182	2.99853	3.20796	3.4304	Replication, recombination and repair	PREDICTED: probable DEAD-box ATP-dependent RNA helicase 48 [Solanum tuberosum]
RHC12H2G2173.2.gene	1.81783	1.47356	1.51436	3.53369	4.24569	3.81761	1.55704	1.88541	1.9519	2.09193	2.71161	1.92569	0.621219	1.23973	0.596888	2.29167	3.52303	3.10847	2.80545	1.94563	2.20962	3.797	4.00554	3.37597	Signal transduction mechanisms	PREDICTED: probable LRR receptor-like serine/threonine-protein kinase At1g63430 [Solanum tuberosum]
RHC12H2G2172.2.gene	5.09578	3.28375	3.53918	6.52815	9.83815	11.7692	4.68042	4.75957	3.75154	5.70425	10.221	6.04155	2.22285	6.83354	2.12727	7.56305	2.78339	5.24399	4.47658	4.01249	6.43397	10.6316	10.0463	6.05764	Function unknown	PREDICTED: auxin-responsive protein SAUR68-like [Solanum tuberosum]
RHC12H2G2170.2.gene	0.50556	0.183937	0.274287	0.079701	0.181377	0.186264	0.044809	0.166618	0.216581	0	0.143453	0.144403	0.109016	0.302048	0	0.458295	0.306502	0.40015	0.082539	0.252694	0.155026	0.393129	0.32559	0.161915	Coenzyme transport and metabolism	PREDICTED: probable phosphopantothenoylcysteine decarboxylase [Solanum tuberosum]
RHC12H2G2168.2.gene	9.92555	10.006	10.6753	14.0798	12.4289	13.1029	7.63391	7.96098	7.38281	7.16461	6.8091	7.00013	7.34435	6.82727	8.38381	11.6144	13.9049	11.7786	8.75296	8.59215	8.25057	14.439	14.3265	15.0533	Posttranslational modification, protein turnover, chaperones	PREDICTED: glutathione S-transferase T1-like [Solanum pennellii]
RHC12H2G2167.2.gene	24.6362	22.8199	29.3876	58.4177	66.0994	63.9053	19.7411	18.768	20.6528	22.6639	25.8816	26.3282	22.2824	20.4051	19.0206	42.2674	39.9397	38.5372	24.9467	27.0182	24.9787	61.3248	64.4348	61.4508	Posttranslational modification, protein turnover, chaperones	PREDICTED: probable phospholipid hydroperoxide glutathione peroxidase [Solanum tuberosum]
RHC12H2G2164.2.gene	395.286	395.337	442.286	205.716	202.886	201.786	459.824	468.194	476.638	312.541	326.154	292.383	381.395	322.133	355.786	234.171	262.49	249.734	333.908	339.775	317.024	159.348	149.764	153.851	Carbohydrate transport and metabolism	major intrinsic protein 1-like protein [Solanum tuberosum]
RHC12H2G2163.2.gene	0.405074	0.338142	0.364911	0.459098	0.476537	0.445044	0.393679	0.268728	0.206286	0.35848	0.703371	0.444378	0.243703	0.416098	0.235162	0.206407	0.185998	0.580346	0.393157	0.386011	0.309944	0.270952	0.452214	0.479432	Function unknown	PLAC8 family protein [Trema orientalis]
RHC12H2G2162.2.gene	23.6501	27.5647	25.712	28.2716	28.4271	29.4267	23.0508	25.2419	24.432	23.5959	22.5238	24.655	21.9414	26.6095	20.5259	25.2483	26.3956	23.3953	28.9707	25.4105	27.172	24.1797	26.5567	22.7473	Function unknown	PREDICTED: uncharacterized protein LOC102601208 [Solanum tuberosum]
RHC12H2G2161.2.gene	5.44495	3.96075	4.27607	3.4799	3.93708	3.33938	3.86358	4.32489	4.78746	2.21468	2.02361	2.46223	2.5602	3.61021	2.58471	4.54136	4.43036	4.31301	3.16067	2.9752	3.04409	4.91384	4.1567	3.93741	Function unknown	PREDICTED: uncharacterized protein LOC102601770 [Solanum tuberosum]
RHC12H2G2160.2.gene	1.88297	1.19959	1.28125	1.42123	1.42329	1.39912	0.819829	1.19213	1.62951	1.37393	0.682149	1.24997	0.796843	1.15454	0.552314	1.82153	1.90846	1.69299	0.979573	1.2773	1.13339	1.78557	1.59401	2.02478	Function unknown	PREDICTED: uncharacterized protein LOC107063289 [Solanum tuberosum]
RHC12H2G2158.2.gene	4.49251	3.40857	3.67877	2.93584	2.58208	3.60565	1.4039	1.40471	0.946418	2.50237	2.06258	2.22241	1.22247	2.5475	1.12776	2.13933	2.03745	1.7008	2.42659	2.20306	2.54007	2.70602	3.54535	3.13453	Function unknown	PREDICTED: uncharacterized protein LOC102602107 isoform X3 [Solanum tuberosum]
RHC12H2G2157.2.gene	0.582165	0.549347	0.533837	0.343337	0.388054	0.430613	0.454658	0.759499	0.23223	0.598717	0.421407	0.451809	0.452458	0.788495	0.421943	0.66698	1.02487	1.13615	1.42878	0.548951	0.670401	0.856634	0.670337	1.09113	Inorganic ion transport and metabolism	PREDICTED: cation/H(+) antiporter 18-like [Solanum tuberosum]
RHC12H2G2156.2.gene	2.87868	3.51108	2.52246	2.61394	3.7963	3.10203	3.6074	2.65586	4.23193	2.75621	3.39962	4.05989	2.95615	2.67619	1.97126	2.72184	1.64717	2.73596	3.1244	3.01923	4.99468	2.22878	2.69704	1.99111	Function unknown	PREDICTED: uncharacterized protein LOC102602659 [Solanum tuberosum]
RHC12H2G2155.2.gene	6.17707	5.6543	6.4673	6.24392	6.3306	5.89933	4.05482	4.98738	3.50416	6.38962	6.05383	6.33898	2.89543	6.62507	2.97246	5.19856	5.0076	5.6606	5.67707	5.59491	6.71732	6.28308	6.18143	6.46724	--	PREDICTED: BTB/POZ domain-containing protein POB1-like isoform X1 [Solanum tuberosum]
RHC12H2G2154.2.gene	46.4124	44.7813	43.7041	30.3233	36.7867	36.0358	23.5797	26.2687	28.1892	30.5931	23.4418	27.5547	21.2515	33.5646	20.9433	25.1063	28.5996	31.2285	40.1704	35.7129	30.95	29.6338	28.8253	29.465	Carbohydrate transport and metabolism	PREDICTED: 6-phosphogluconate dehydrogenase, decarboxylating 2, chloroplastic [Solanum tuberosum]
RHC12H2G2152.2.gene	3.52083	2.91213	2.76031	6.42874	8.50066	5.73534	3.29313	4.54738	2.99784	5.10876	4.26997	4.69458	1.63398	5.72977	1.7792	4.57224	3.85358	3.99743	4.96924	4.77344	5.58658	6.07175	6.75544	5.79737	Energy production and conversion	PREDICTED: V-type proton ATPase subunit E [Solanum lycopersicum]
RHC12H2G2151.2.gene	128.654	122.283	140.965	291.459	262.731	284.247	147.711	129.263	137.547	310.58	353.006	311.262	120.162	289.514	121.751	175.758	167.176	162.155	365.389	357.36	329.392	240.505	250.8	246.775	Posttranslational modification, protein turnover, chaperones	ubiquitin conjugating enzyme E2 [Solanum lycopersicum]
RHC12H2G2150.2.gene	7.15941	7.32327	6.33969	9.83748	6.05368	10.5668	24.3393	21.8256	22.1907	11.9603	16.1375	10.5623	73.1786	7.95008	65.809	17.8874	11.5559	15.9575	11.2217	9.37818	9.58947	9.59455	8.58488	7.93884	Function unknown	hypothetical protein T459_30420 [Capsicum annuum]
RHC12H2G2149.2.gene	21.5974	24.3331	13.4558	20.6912	29.8117	31.0821	22.0915	17.1505	22.6344	28.7829	12.3411	30.6075	19.9337	30.8501	22.0645	17.1329	29.4965	29.5989	15.8402	28.1692	28.6293	15.3264	23.927	26.9985	RNA processing and modification	PREDICTED: crooked neck-like protein 1 [Solanum lycopersicum]
RHC12H2G2145.2.gene	3.2444	3.36753	3.09692	3.73276	4.86069	3.7284	4.12502	4.37775	3.88636	3.95393	4.52951	3.79586	3.29713	3.593	3.5007	4.13593	2.78931	3.77525	4.48578	3.96681	4.35892	4.11585	4.45638	3.48838	Function unknown	PREDICTED: uncharacterized protein LOC107005424 [Solanum pennellii]
RHC12H2G2141.2.gene	23.4297	24.6326	26.9268	21.1725	17.0415	16.0802	17.8094	17.5466	16.9134	18.2244	17.5732	18.8816	16.8601	24.97	13.2955	16.1084	17.2351	18.0196	22.2071	24.1915	22.4717	15.8919	18.2967	16.2827	--	PREDICTED: abscisic acid receptor PYL8-like [Solanum tuberosum]
RHC12H2G2140.2.gene	12.8595	15.4118	14.0134	20.3601	23.0537	23.5719	9.05736	9.89864	8.83049	6.69719	5.52317	5.44844	1.74186	9.66015	2.10948	10.1027	10.9861	11.4989	9.86186	9.74444	9.08125	9.71507	9.51688	11.3255	Carbohydrate transport and metabolism	PREDICTED: endoglucanase 6 [Solanum tuberosum]
RHC12H2G2138.2.gene	3.06176	1.92924	3.23203	5.32848	4.30722	5.80572	4.887	3.86455	3.39319	3.71675	5.09509	3.88492	2.64882	3.69185	2.61821	5.19688	3.32404	4.00909	4.57341	4.59359	4.50758	4.31554	4.01768	4.27738	Function unknown	PREDICTED: uncharacterized protein LOC102579258 [Solanum tuberosum]
RHC12H2G2137.2.gene	3.08486	2.52717	3.10669	2.92477	3.73972	3.04152	1.18534	1.17572	1.58565	1.86578	2.18414	2.03721	0.616321	2.79556	0.999588	2.04705	2.16162	2.4932	2.05233	2.23574	2.76067	2.48896	3.27298	3.42619	Function unknown	PREDICTED: uncharacterized protein LOC102579813 [Solanum tuberosum]
RHC12H2G2136.2.gene	23.9227	39.9246	40.078	29.8119	49.5056	47.0426	49.2915	45.1249	44.7455	46.5579	48.7407	45.9039	32.7529	28.6544	29.0083	44.4396	42.0534	37.311	25.6879	50.2559	28.6993	38.4297	21.6127	37.9859	Function unknown	PREDICTED: uncharacterized protein LOC102580131 [Solanum tuberosum]
RHC12H2G2135.2.gene	4.93888	4.69211	5.37319	1.71113	3.12934	2.19109	2.44746	2.13273	2.14242	1.6502	1.37544	1.25102	1.99936	1.39588	1.9648	2.58859	2.08824	2.93928	2.18534	2.26082	1.90015	3.92769	3.15543	2.41138	Cell wall/membrane/envelope biogenesis	PREDICTED: UDP-glucose 4-epimerase GEPI48-like [Solanum lycopersicum]
RHC12H2G2133.2.gene	1.85503	1.31901	1.61899	2.99282	2.80462	2.57652	2.58356	2.47116	1.67127	3.5493	2.59511	2.97875	1.70939	2.73605	1.43728	2.56127	2.6643	2.7628	2.62491	2.91912	2.57489	3.57848	3.26686	3.4236	Function unknown	PREDICTED: uncharacterized protein At4g10930-like isoform X3 [Solanum tuberosum]
RHC12H2G2128.2.gene	4.33725	2.45875	3.24684	3.32577	3.20219	2.90251	3.21169	2.51969	1.33129	2.51308	2.12485	2.24716	1.74433	2.03727	1.70009	2.61339	3.5811	4.3355	3.60363	2.53896	2.82328	3.50816	4.46158	2.37479	Function unknown	PREDICTED: uncharacterized protein C119.09c-like [Solanum tuberosum]
RHC12H2G2127.2.gene	1.50336	1.06638	1.40483	1.98018	0.984752	1.02781	2.12163	1.5452	1.7066	1.72868	1.51016	0.585479	1.09688	1.82438	0.846202	1.17789	0.971432	1.30961	1.82129	1.30224	1.22006	1.62601	1.4058	1.30782	--	PREDICTED: uncharacterized protein LOC102583473 [Solanum tuberosum]
RHC12H2G2126.2.gene	38.1249	41.1743	36.6055	24.0884	27.3773	25.4334	26.8557	29.8801	26.9874	16.5756	19.5352	16.8781	13.0962	19.8076	13.3442	20.9056	21.5609	27.5622	18.2071	16.9883	23.9309	19.2808	19.7568	19.7169	Carbohydrate transport and metabolism	glucan endo-1,3-beta-glucosidase 11-like precursor [Solanum tuberosum]
RHC12H2G2125.2.gene	23.0947	27.3381	23.7197	16.5598	15.69	15.2552	12.0292	16.4357	13.051	16.96	17.0719	14.5538	17.0189	21.4153	14.0936	16.0205	16.4417	15.8146	22.2476	19.2233	20.4403	17.5709	17.7744	17.9125	Energy production and conversion	PREDICTED: soluble inorganic pyrophosphatase isoform X1 [Solanum tuberosum]
RHC12H2G2124.2.gene	15.9651	16.8043	18.322	8.71204	9.64795	8.8568	11.7709	13.9765	10.5568	16.4956	16.4047	15.7603	13.2723	17.8068	10.2811	11.6041	11.2449	10.2908	15.2255	17.6036	14.7629	10.5239	10.0689	10.7112	Energy production and conversion	PREDICTED: probable cinnamyl alcohol dehydrogenase 1 [Solanum tuberosum]
RHC12H2G2123.2.gene	2.57627	2.81101	2.53423	0.977704	1.92947	1.14095	1.86174	1.7596	2.15815	1.3508	1.42566	1.42743	0.770041	1.64031	1.71272	0.868853	1.34013	1.64928	2.06895	2.00981	1.69477	1.27484	1.48532	1.09588	Posttranslational modification, protein turnover, chaperones	PREDICTED: AAA-ATPase At5g57480-like isoform X1 [Solanum tuberosum]
RHC12H2G2122.2.gene	17.4626	18.1593	18.7666	25.459	25.9621	23.0573	10.1119	10.5142	11.6255	16.878	17.9225	17.2717	12.6854	20.9413	11.1641	10.9364	11.0764	9.81556	14.8115	16.8379	19.5935	15.5064	19.809	18.1644	--	--
RHC12H2G2119.2.gene	145.995	128.715	138.192	89.7849	99.4594	102.466	96.8246	99.4788	102.063	99.8618	94.3691	98.848	104.366	112.749	100.318	86.0323	99.3349	102.971	105.939	115.32	100.481	103.795	98.2772	103.007	Energy production and conversion	PREDICTED: V-type proton ATPase catalytic subunit A [Solanum tuberosum]
RHC12H2G2117.2.gene	5.75481	5.50381	4.6552	3.91981	6.62605	6.12062	5.29352	5.9593	4.61164	5.5123	5.87679	5.58992	4.279	7.17765	4.2201	6.48606	5.95184	6.04108	5.71417	5.76653	6.72134	5.97032	6.19109	5.6213	Function unknown	PREDICTED: KH domain-containing protein At4g18375 [Solanum tuberosum]
RHC12H2G2115.2.gene	90.3564	66.6867	113.215	69.3905	52.6654	49.2871	55.4331	52.8639	55.4494	37.3719	63.0374	58.5223	56.7708	40.3615	64.1076	53.9414	45.6888	52.6671	52.1344	53.0458	59.8198	70.015	49.9595	59.3747	Energy production and conversion	PREDICTED: ATP synthase subunit epsilon, mitochondrial [Solanum tuberosum]
RHC12H2G2114.2.gene	6.21923	4.98178	5.42689	3.48174	4.39743	4.75592	5.45499	5.25121	4.2899	3.67534	4.61431	4.33957	6.47889	4.79857	5.57922	4.6347	5.38218	4.98161	4.31175	4.69227	5.21314	5.4471	5.41453	4.90376	Inorganic ion transport and metabolism	PREDICTED: vacuolar cation/proton exchanger 3-like [Solanum tuberosum]
RHC12H2G2113.2.gene	4.03325	3.77242	3.92762	3.36512	3.8912	3.84244	2.83644	2.36687	2.38696	3.14525	2.71473	1.89825	2.14853	2.96938	2.45662	2.74602	2.43196	2.57752	3.29793	2.78298	2.63703	2.99058	3.98322	3.03757	Function unknown	PREDICTED: uncharacterized protein C630.12 [Solanum pennellii]
RHC12H2G2108.2.gene	2.72407	2.88461	1.95285	9.6762	8.38391	10.2505	5.78161	4.69244	3.71678	3.67459	4.99329	4.64208	2.89629	2.35248	2.85793	14.6439	12.1233	12.1006	1.94257	2.42439	2.6889	17.4615	18.1749	17.7617	--	--
RHC12H2G2106.2.gene	0.612218	0.219098	0.346732	0.564978	0.623956	0.474501	0.083523	0.314613	0.184481	0.539868	0.384543	0.598215	0.059137	0.254727	0.268899	0.72142	0.547746	0.485406	0.232012	0.179433	0.482388	0.290289	0.648012	0.325729	Function unknown	PREDICTED: poly(A)-specific ribonuclease PARN [Solanum tuberosum]
RHC12H2G2105.2.gene	1.51905	1.24198	1.66452	3.67117	3.16616	3.7085	1.66957	1.75984	1.74314	2.43315	2.68208	2.69052	1.29258	1.97389	1.28961	2.52033	1.57467	1.97351	2.20893	2.07844	2.61129	3.59	2.98417	2.88217	Carbohydrate transport and metabolism	PREDICTED: heparanase-like protein 2 [Solanum lycopersicum]
RHC12H2G2100.2.gene	3.51331	3.05077	4.37146	2.56402	2.85676	3.55536	3.31812	2.6535	2.28664	1.37043	1.40227	1.41965	1.90404	3.10261	1.72675	2.5326	3.5277	2.74538	2.86154	2.22393	2.25323	2.40981	2.86868	2.3539	Function unknown	PREDICTED: protein STRUBBELIG-RECEPTOR FAMILY 7-like [Solanum tuberosum]
RHC12H2G2097.2.gene	28.842	27.5001	26.7744	20.4889	22.2185	21.0908	20.9926	21.9398	22.1966	27.6641	25.5832	26.4107	19.584	24.9188	21.771	22.355	26.5102	24.3141	28.945	25.3798	26.0846	20.9473	18.7687	20.853	Function unknown	PREDICTED: protein STRUBBELIG-RECEPTOR FAMILY 7-like [Solanum tuberosum]
RHC12H2G2095.2.gene	0.339951	0.406495	0.796072	0.662188	0.483308	0.663929	0.291761	0.268827	0.18142	0.561262	0.628595	0.303652	0.117604	0.394145	0.207948	0.406756	0.490563	0.301344	0.566182	0.384302	0.561977	0.655226	0.741995	0.654146	Function unknown	PREDICTED: uncharacterized protein LOC107009393 isoform X1 [Solanum pennellii]
RHC12H2G2093.2.gene	1.06312	0.799663	0.932654	1.45099	1.6587	1.4355	0.939197	0.821322	0.493036	1.21452	1.35807	1.21737	0.404957	1.25849	0.497506	0.992351	1.16323	1.08371	1.36792	1.39919	1.32791	1.59365	1.09175	2.02435	Posttranslational modification, protein turnover, chaperones	PREDICTED: 1-phosphatidylinositol-3-phosphate 5-kinase FAB1B-like isoform X2 [Solanum tuberosum]
RHC12H2G2091.2.gene	17.3783	15.0014	17.337	11.9271	10.8749	11.3053	11.122	10.6148	11.2263	13.7219	14.1863	12.6213	10.6774	14.013	11.6183	10.8298	12.8412	8.80006	11.0281	14.9675	13.7555	11.7297	11.9496	11.0117	Function unknown	PREDICTED: AT-rich interactive domain-containing protein 4 [Solanum tuberosum]
RHC12H2G2090.2.gene	4.44375	5.12981	4.11653	6.94081	7.66649	7.86053	5.33448	6.85649	3.97022	7.74779	5.8081	7.99859	10.0073	8.77553	11.3014	7.92646	9.38833	7.64804	5.85153	6.82644	7.81919	7.84894	8.08162	6.51104	--	PREDICTED: ethylene-responsive transcription factor RAP2-12-like [Solanum tuberosum]
RHC12H2G2089.2.gene	6.84717	3.95621	3.42337	3.89223	4.64061	3.03045	4.15387	3.24298	4.05575	4.96679	6.65574	5.55693	1.23528	5.41383	1.66925	6.50744	4.14464	4.42778	4.13219	7.72592	6.51009	3.41918	6.56474	5.39957	Function unknown	PREDICTED: GDSL esterase/lipase 5-like [Solanum tuberosum]
RHC12H2G2088.2.gene	3.7303	2.86359	3.26973	7.7672	8.44045	7.9953	5.3023	4.71437	3.6713	8.51593	8.79258	8.67261	2.91143	6.22838	2.65296	5.97759	5.47258	4.28484	6.25421	6.61627	7.60588	9.28726	9.74124	9.1577	Signal transduction mechanisms	PREDICTED: phosphoinositide phosphatase SAC2-like isoform X1 [Solanum tuberosum]
RHC12H2G2087.2.gene	1.01748	1.09148	0.995439	2.55311	3.25334	2.96262	0.882394	1.09775	1.01291	1.45215	1.06323	1.46183	0.761989	1.23516	0.766553	2.09853	1.84703	2.00976	1.39181	1.06902	1.215	3.36566	2.90119	2.85076	Function unknown	PREDICTED: uncharacterized protein LOC102584476 [Solanum tuberosum]
RHC12H2G2086.2.gene	1.87728	2.15177	2.17878	2.38755	3.0517	3.5501	2.28001	2.11769	1.65426	2.09499	2.06443	1.4447	1.51003	1.82884	1.61395	2.06737	2.46243	2.21793	2.80739	2.32051	1.93115	3.31746	3.00219	3.47681	Function unknown	PREDICTED: uncharacterized protein LOC102584804 [Solanum tuberosum]
RHC12H2G2084.2.gene	1.39052	1.32812	1.16311	2.04571	2.02109	1.17504	1.46965	1.29977	1.13715	2.15939	2.55803	3.26741	0.547929	2.03263	0.577663	1.59361	1.26369	1.29454	3.04397	2.07249	2.50506	1.55118	2.58005	2.07597	Posttranslational modification, protein turnover, chaperones	PREDICTED: peptidyl-prolyl cis-trans isomerase CYP59-like [Solanum tuberosum]
RHC12H2G2083.2.gene	0.708895	0	0	6.29623	0.801011	0.684999	0	0	2.3227	0.513047	0	0	0	0	0.034369	0.045134	0	0	0	0	0.329747	5.20606	0	0	Intracellular trafficking, secretion, and vesicular transport	PREDICTED: 25.3 kDa vesicle transport protein-like isoform X1 [Nicotiana tabacum]
RHC12H2G2082.2.gene	1.77268	2.28537	1.84763	3.3948	2.86957	3.31246	1.39153	1.82527	1.23164	2.59051	2.45879	1.92207	1.5673	3.59411	1.34255	2.01226	2.08194	3.23944	3.33214	3.06332	2.30109	2.74559	3.5109	3.38678	Intracellular trafficking, secretion, and vesicular transport	PREDICTED: nuclear pore complex protein NUP107 [Solanum tuberosum]
RHC12H2G2081.2.gene	1.29001	0.83265	1.60478	2.86771	2.92212	3.47514	0.219512	1.043	1.14487	1.06462	1.84718	1.81096	1.1957	2.15046	0.930603	1.75623	1.78505	1.50254	1.77238	1.86996	1.28311	3.13284	3.66056	4.35031	--	PREDICTED: protein TIFY 10A-like isoform X1 [Solanum tuberosum]
RHC12H2G2080.2.gene	11.7684	10.8668	10.7601	8.09533	8.4728	10.1006	11.9781	12.3117	10.0424	9.65568	8.70191	9.97546	12.7064	9.43847	12.1693	9.72156	8.95272	9.54332	8.17467	8.55846	8.59792	9.74826	9.55582	10.1313	Function unknown	PREDICTED: transmembrane protein 87A-like [Solanum tuberosum]
RHC12H2G2079.2.gene	0.756464	0.764786	1.38632	1.09704	0.662346	0.748613	1.09712	0.849438	1.40124	1.56431	1.84582	1.29984	1.09495	1.08215	1.22958	1.03576	0.84425	1.02944	1.56596	1.52641	1.41077	1.19257	0.86808	0.515491	Function unknown	PREDICTED: uncharacterized protein LOC102585440 [Solanum tuberosum]
RHC12H2G2078.2.gene	1.69386	1.80993	2.15713	2.40569	2.27168	2.19188	0.797593	1.20327	0.87276	1.08529	1.41637	1.3653	0.425919	0.713791	0.488124	1.85213	1.3251	1.66885	0.914772	0.874692	1.17677	2.3409	1.48554	2.23295	Signal transduction mechanisms	PREDICTED: putative receptor-like protein kinase At1g72540 [Solanum tuberosum]
RHC12H2G2071.2.gene	1.00432	1.50944	1.18062	0.303697	0	0	0	0	0	0.243094	0.248723	0.200934	0	0.116308	0	0.25006	0.03149	0.215066	0.188114	0.224662	0.257082	0.19231	0.06676	0.141528	Transcription	PREDICTED: transcription factor MYB12-like isoform X2 [Solanum lycopersicum]
RHC12H2G2069.2.gene	3.30515	3.0733	3.22797	3.28849	3.19927	3.27963	4.19815	3.41576	4.24481	3.44244	3.69313	3.05328	3.02834	3.26532	3.03149	3.61885	3.75571	3.62882	3.29594	3.58916	3.85801	2.46964	4.47036	4.55193	Posttranslational modification, protein turnover, chaperones	PREDICTED: mitochondrial ubiquitin ligase activator of nfkb 1-like isoform X2 [Solanum tuberosum]
RHC12H2G2067.2.gene	163.127	183.411	174.827	42.5799	39.0141	35.1156	97.968	89.4468	99.5323	56.9541	57.8277	62.9098	50.3646	86.8105	45.8557	66.2457	61.5854	64.3612	78.5595	82.5845	91.5045	28.8083	27.7935	29.139	Function unknown	auxin-binding protein abp19a [Nicotiana attenuata]
RHC12H2G2066.2.gene	5.30547	4.73559	6.24068	4.2525	3.05803	3.29205	5.17236	4.68333	3.40995	3.40399	4.14786	4.78275	2.77317	2.61498	3.78264	3.67018	3.64837	4.58322	2.45648	3.64955	3.12198	3.99437	4.61741	4.35833	Intracellular trafficking, secretion, and vesicular transport	PREDICTED: ubiquitin-like protein ATG12 isoform X1 [Solanum tuberosum]
RHC12H2G2064.2.gene	13.9975	12.8997	17.1481	11.1267	14.0288	12.1237	16.4719	13.7698	18.1635	15.8477	13.1809	14.6938	13.3848	15.4511	12.2513	17.0221	12.5527	15.4427	11.9306	15.8937	14.7818	12.0763	16.9431	13.5311	--	PREDICTED: protein ELF4-LIKE 3 [Solanum tuberosum]
RHC12H2G2063.2.gene	10.0154	8.21198	8.75879	5.21405	5.50786	5.49859	8.50988	7.76548	9.37666	3.68302	3.8012	3.06503	6.59074	3.26727	7.07393	9.15764	6.71309	9.27518	2.31564	3.12605	4.69025	5.24606	8.11957	6.26955	Function unknown	PREDICTED: uncharacterized protein LOC102588097 [Solanum tuberosum]
RHC12H2G2062.2.gene	1.24806	0.890644	2.09801	3.88384	3.27629	4.22514	8.77803	8.46099	6.94567	8.2219	8.3029	7.49761	8.35103	7.36161	6.67787	5.01957	5.95703	6.37168	8.30898	7.71725	7.28965	3.69002	4.1139	3.99877	Function unknown	PREDICTED: developmentally-regulated G-protein 2 [Solanum tuberosum]
RHC12H2G2061.2.gene	5.8836	8.06265	6.31736	9.11236	10.1656	10.9201	5.47515	6.10643	6.29758	8.9337	8.18407	9.56076	5.5888	10.4639	5.58105	6.46895	7.46937	8.18612	10.0972	10.0862	9.61383	9.49637	9.26246	7.85618	Function unknown	PREDICTED: uncharacterized protein LOC102588968 isoform X1 [Solanum tuberosum]
RHC12H2G2057.2.gene	5.1591	3.88487	3.97271	11.9075	11.1219	11.1772	8.93986	9.39694	10.3747	14.1706	17.6364	14.2426	11.8737	13.2063	11.5794	10.4249	11.7568	11.8338	14.0894	13.8038	12.7909	10.0806	9.58983	8.85976	Posttranslational modification, protein turnover, chaperones	PREDICTED: mitochondrial import inner membrane translocase subunit TIM23-1-like [Solanum tuberosum]
RHC12H2G2056.2.gene	0.527133	1.07736	1.68268	0.30075	1.21243	1.05141	0.64821	1.14102	0.799625	1.10485	0.385937	0.544047	0.40303	0.291377	0.934733	2.06558	0.415705	0.537149	1.70644	0.775631	0.345484	1.25627	1.14242	1.10071	--	hypothetical protein BC332_30888 [Capsicum chinense]
RHC12H2G2050.2.gene	0.610399	1.09998	0.705293	0	0	0	0.623053	0.78205	0.824021	0	0	0	0.276428	0	0	1.24988	0	0.893948	0	0.072315	0.093326	0	0.63778	0.701304	Function unknown	PREDICTED: 3-oxoacyl-[acyl-carrier-protein] reductase FabG-like, partial [Solanum tuberosum]
RHC12H2G2049.2.gene	4.63302	5.03063	4.56755	0.387125	0.448115	0.27656	2.88109	2.43006	2.79254	0.924488	1.19947	1.02668	2.01575	0.914867	1.52072	3.4374	2.671	2.34963	1.26248	0.90773	1.0745	1.69904	2.04694	1.95967	Function unknown	PREDICTED: 3-oxoacyl-[acyl-carrier-protein] reductase FabG-like [Solanum tuberosum]
RHC12H2G2037.2.gene	0.4025	0.605934	0.21089	7.75698	5.73446	8.17798	0.086652	0.288011	0.141266	0.663153	0.648538	0.980441	0.303294	1.63243	0.244142	1.59898	0.846037	1.99861	1.07168	2.05211	1.64713	2.74275	4.05645	2.18278	Lipid transport and metabolism	PREDICTED: delta(12)-fatty-acid desaturase FAD2-like [Solanum pennellii]
RHC12H2G2036.2.gene	0.291061	0.225071	0.278819	1.09528	0.937722	1.06464	0.465363	0.509615	0.392153	0.218579	0.216219	0.310441	0.076917	0.291259	0.264609	0.877236	0.617386	0.518706	0.22837	0.241144	0.072323	1.04583	0.954059	0.820702	Function unknown	PREDICTED: 3-oxoacyl-[acyl-carrier-protein] reductase FabG-like [Solanum pennellii]
RHC12H2G2035.2.gene	5.70828	5.69707	6.67325	11.4772	13.5099	12.0292	2.46189	2.33838	2.89803	4.03981	3.91443	4.30375	1.73333	7.24267	2.13725	8.15375	8.72756	8.95436	5.76751	6.3605	6.0733	11.2842	12.8299	14.8529	Function unknown	PREDICTED: 3-oxoacyl-[acyl-carrier-protein] reductase FabG-like [Solanum pennellii]
RHC12H2G2033.2.gene	0.408355	0.24438	0.242101	1.32468	0.689863	1.36533	0.276736	0.499744	0.026398	0.7132	0.727986	0.586504	0.032846	2.39445	0.37696	0.531979	0.907721	0.409071	2.11132	2.58226	2.58227	1.08179	2.08906	2.54287	Secondary metabolites biosynthesis, transport and catabolism	PREDICTED: cytochrome P450 CYP736A12 [Solanum lycopersicum]
RHC12H2G2020.2.gene	0.741108	0.831522	1.16132	2.71075	2.34076	2.90893	0.366292	0.258777	0.0697	1.19396	1.39811	1.13945	0.185329	2.25365	0.664819	1.23627	0.813022	1.35572	2.83059	2.71189	1.30215	0.790567	0.585083	1.10397	Lipid transport and metabolism	PREDICTED: delta(12) oleic acid desaturase FAD2-like [Solanum tuberosum]
RHC12H2G2016.2.gene	0.729223	0.860904	0.88544	2.45631	2.50225	2.43388	0.362222	0.598542	0.597789	1.13072	1.13686	0.939501	0.929633	1.76403	0.774366	1.01979	0.736424	1.25448	2.65272	2.13323	1.99481	0.922696	0.530657	1.27747	Lipid transport and metabolism	PREDICTED: delta(12) oleic acid desaturase FAD2-like [Solanum tuberosum]
RHC12H2G2015.2.gene	4.19296	3.00562	5.5382	5.98042	6.5503	5.35109	1.91413	1.80284	1.52253	4.05478	3.32736	4.53829	1.65439	7.06072	2.03437	3.88272	3.58688	4.62822	5.39095	5.36571	5.76146	4.87936	4.18922	5.05915	Function unknown	PREDICTED: 3-oxoacyl-[acyl-carrier-protein] reductase FabG-like [Solanum pennellii]
RHC12H2G2013.2.gene	1.44496	1.37632	1.47156	1.57728	1.41662	1.65613	2.07211	2.43947	2.39398	1.44073	1.28496	1.51312	1.55003	2.16355	1.77564	1.39671	1.40218	1.04054	2.24772	3.17535	2.10032	1.51112	1.71815	1.42251	--	PREDICTED: F-box protein PP2-B10-like [Solanum tuberosum]
RHC12H2G2012.2.gene	2.30757	2.42175	2.623	3.74327	3.64617	3.51696	2.47948	3.27796	2.58917	3.46312	3.62403	2.76254	1.95267	3.88466	1.49081	2.34908	2.75572	2.28506	3.83982	3.17775	3.90541	3.17825	3.17921	3.29335	Inorganic ion transport and metabolism	PREDICTED: probable phospholipid-transporting ATPase 4 [Solanum tuberosum]
RHC12H2G2011.2.gene	1.48495	1.88186	2.43323	1.84421	1.2648	2.04745	1.05339	1.02899	1.40657	0.727467	1.14497	0.7676	1.31131	0.929071	1.33223	1.29333	0.83645	1.51674	1.32329	1.11394	1.35493	1.05645	1.24993	1.70566	Intracellular trafficking, secretion, and vesicular transport	nonclathrin coat protein zeta2-COP [Solanum lycopersicum]
RHC12H2G2008.2.gene	8.81818	8.03598	8.60124	11.9323	10.4509	11.942	7.82742	8.53961	7.30604	9.80665	8.10265	8.10397	7.78843	8.35636	8.53744	7.24812	8.17361	8.51118	10.1364	7.98583	8.26417	9.5978	9.02765	9.7091	Carbohydrate transport and metabolism	PREDICTED: beta-galactosidase [Solanum tuberosum]
RHC12H2G2006.2.gene	7.31639	10.1234	8.68328	10.1126	10.4262	10.6981	15.722	16.8446	15.5573	14.9404	14.8082	12.4004	17.766	13.6842	16.0194	10.3615	13.2998	12.3574	16.9128	14.7955	15.7441	10.243	9.15484	10.1815	Replication, recombination and repair	PREDICTED: DEAD-box ATP-dependent RNA helicase 20 isoform X2 [Solanum tuberosum]
RHC12H2G2005.2.gene	5.56534	5.61759	5.52597	6.28212	4.80685	4.82543	3.10346	5.19426	4.97395	5.66534	6.17931	4.84828	4.51862	5.12442	4.02812	6.17107	6.2351	4.75024	3.89951	4.67033	4.87772	5.59617	7.85664	5.67388	Function unknown	PREDICTED: uncharacterized protein LOC102594655 [Solanum tuberosum]
RHC12H2G2004.2.gene	2.95684	2.61552	2.7606	2.49263	2.53986	2.77156	1.66341	1.73881	1.86871	1.65261	1.83718	1.83459	1.29686	1.53222	1.29708	4.09126	4.02654	4.5409	1.60359	1.70016	1.85083	3.20433	3.52883	2.50543	Signal transduction mechanisms	PREDICTED: inactive protein kinase SELMODRAFT_444075-like [Solanum tuberosum]
RHC12H2G2003.2.gene	9.30531	10.2013	8.418	11.0368	9.10108	9.30351	6.24239	8.28422	6.33468	12.4755	10.1463	11.3578	6.0708	11.4862	5.3291	7.06299	9.98634	6.9782	8.38776	10.1571	12.8813	10.2656	10.9598	9.90691	Defense mechanisms	PREDICTED: ABC transporter C family member 8 [Solanum tuberosum]
RHC12H2G2002.2.gene	1.54648	2.65567	2.646	3.80499	4.52203	4.60063	2.6102	2.69643	2.74325	4.25154	3.23606	4.23076	3.17621	2.85396	2.7006	2.83732	2.75299	2.58623	3.3956	2.70789	2.70452	3.05075	3.24648	2.94474	Function unknown	PREDICTED: uncharacterized protein LOC107812905 [Nicotiana tabacum]
RHC12H2G2001.2.gene	5.64956	5.80756	5.62649	5.02599	6.96037	3.8441	3.26321	3.3729	5.63664	6.33789	5.79909	5.61586	5.61957	7.38846	5.30646	5.83576	5.26453	5.2862	6.03837	5.86001	6.66213	7.68862	3.05948	3.92294	Signal transduction mechanisms	PREDICTED: serine/threonine protein phosphatase 2A 55 kDa regulatory subunit B beta isoform-like isoform X1 [Solanum tuberosum]
RHC12H2G2000.2.gene	1.77232	1.22003	1.30651	1.24962	1.12714	1.46464	2.0163	1.91165	2.03082	0.807295	1.01659	1.15728	0.452665	1.38936	0.468123	2.45623	2.41426	2.14064	0.860949	1.32725	0.564359	1.69013	1.77774	1.60222	Secondary metabolites biosynthesis, transport and catabolism	PREDICTED: cytochrome P450 CYP736A12-like [Solanum tuberosum]
RHC12H2G1998.2.gene	15.0975	13.4106	21.4912	12.4178	21.2213	20.9158	7.41272	12.5502	10.7719	14.4491	20.4765	12.4054	17.4441	22.9446	9.02476	20.4312	24.3385	18.1661	15.393	20.3369	15.4897	21.3076	24.7974	20.3474	Posttranslational modification, protein turnover, chaperones	PREDICTED: ubiquitin carboxyl-terminal hydrolase 6 [Solanum tuberosum]
RHC12H2G1997.2.gene	8.63366	9.49548	13.7803	24.0935	21.969	17.7114	16.3945	13.9302	14.2889	11.6921	15.6927	15.575	9.66791	13.9652	8.4795	16.1428	17.1474	19.7306	10.8759	8.70747	15.3716	17.019	17.5864	15.0663	Translation, ribosomal structure and biogenesis	PREDICTED: 40S ribosomal protein S15a-5 [Solanum lycopersicum]
RHC12H2G1996.2.gene	92.5192	105.936	109.604	131.489	106.671	127.216	93.3732	84.2723	76.0704	78.5779	119.041	76.3645	80.0382	91.8065	69.8338	108.41	69.1221	78.7599	101.535	106.431	94.7685	85.3886	104.53	93.5207	Translation, ribosomal structure and biogenesis	PREDICTED: 60S ribosomal protein L28-1-like [Solanum pennellii]
RHC12H2G1994.2.gene	3.19284	2.49501	3.04079	5.17639	6.29705	4.71659	2.49478	2.24573	2.03258	4.71571	5.96215	4.8102	2.46389	4.62393	2.78841	3.51334	2.92883	3.05855	3.19137	4.21289	4.312	5.12251	5.01263	4.40118	--	PREDICTED: adhesive plaque matrix protein-like [Solanum pennellii]
RHC12H2G1991.2.gene	14.1352	15.261	17.1597	13.7177	11.8513	13.8599	7.15142	7.54051	6.91352	10.2296	8.91118	10.179	6.37046	10.7025	6.40107	9.8247	8.73156	8.03483	11.6773	10.6959	11.773	12.9075	12.8149	11.3546	Function unknown	PREDICTED: F-box protein At3g59000-like [Solanum tuberosum]
RHC12H2G1986.2.gene	2.62466	2.22545	2.53844	1.49858	1.46128	0.838245	0.755218	0.828004	0.510794	0.558643	0.448515	0.577688	0.227629	1.29229	0.678748	1.54593	1.66613	1.09835	0.754257	0.678482	0.881011	0.540612	0.649469	0.821494	Function unknown	PREDICTED: anthocyanin 5-aromatic acyltransferase-like [Solanum tuberosum]
RHC12H2G1979.2.gene	2.01825	1.54873	2.05549	3.73814	3.21915	4.41157	1.53899	2.07997	2.07041	2.86335	2.53794	3.51269	1.86136	3.23119	1.61941	2.65392	2.72295	3.85858	3.8339	2.48591	2.2409	2.90466	3.07611	4.61616	Transcription	PREDICTED: mediator of RNA polymerase II transcription subunit 6-like [Solanum pennellii]
RHC12H2G1978.2.gene	3.25607	0	3.7851	0	0	1.68473	1.93625	0	0	0	1.283	0.111616	4.75532	0.483077	0	2.99344	2.097	2.20856	3.36409	0	1.7289	0	4.70585	0	Posttranslational modification, protein turnover, chaperones	profilin-1 [Solanum lycopersicum]
RHC12H2G1973.2.gene	2.75534	3.84818	3.18063	4.9207	6.53399	4.99991	3.8628	3.587	2.60295	5.69319	5.85522	5.90584	2.19239	5.46478	2.68776	3.63821	2.92005	3.17014	5.11599	4.63368	5.26726	5.60922	6.0074	4.78721	--	PREDICTED: uncharacterized protein LOC102591336 [Solanum tuberosum]
RHC12H2G1949.2.gene	10.7684	13.5554	10.5486	26.0674	26.8793	22.3144	9.74518	10.2454	10.0725	15.2709	14.5275	14.8982	9.06787	17.4705	10.3243	9.55354	10.7845	9.35092	14.8632	17.1767	14.8705	16.3908	14.5955	12.9935	Function unknown	NAP1-related protein 2-like [Solanum tuberosum]
RHC12H2G1943.2.gene	1.02421	1.35925	1.11938	2.54077	1.95814	2.27228	1.18362	1.05302	0.739776	1.20727	1.05954	1.95005	0.899221	1.74634	0.679189	1.18403	0.980268	1.18962	1.48852	1.29373	1.42385	1.26772	1.49702	1.28318	Function unknown	PREDICTED: putative pentatricopeptide repeat-containing protein At1g74580 isoform X1 [Solanum lycopersicum]
RHC12H2G1942.2.gene	0.67027	0.864374	1.71066	2.24713	1.85188	1.80502	0.505491	0.674017	0.756168	0.809732	0.99135	0.466723	1.04611	1.48104	1.06828	0.993402	1.08594	1.71489	1.25564	1.08932	1.22289	1.27317	1.56976	2.70987	Function unknown	PREDICTED: putative pentatricopeptide repeat-containing protein At1g74580 isoform X2 [Solanum tuberosum]
RHC12H2G1939.2.gene	0.86578	1.16651	0.660825	0.808592	0.174749	0.347127	0.494293	0.503127	0.611381	0.189746	0	0.075465	0.678472	1.16123	0.697718	0.302115	0.474433	0.077234	0.619854	1.05004	1.19565	0	0	0.130417	Posttranslational modification, protein turnover, chaperones	hypothetical protein CQW23_03892 [Capsicum baccatum]
RHC12H2G1938.2.gene	1.45009	1.90886	1.31518	2.79287	3.48265	3.33809	1.17016	1.3109	0.97109	2.25952	1.59461	1.94339	0.897225	1.58724	0.497507	1.61872	1.63877	1.34778	2.19507	1.96482	2.24766	2.40326	2.34509	2.71931	Function unknown	PREDICTED: LOW QUALITY PROTEIN: pentatricopeptide repeat-containing protein At1g74630-like [Solanum pennellii]
RHC12H2G1931.2.gene	0.562449	0	0	2.05155	0	0	1.38583	0	0	0	0	0	0	0.539244	0	0.437174	0	0	1.38376	0	0.225267	1.5501	0	0	Function unknown	PREDICTED: uncharacterized protein LOC102587471 [Solanum tuberosum]
RHC12H2G1930.2.gene	0.371282	0.558232	0.256526	0.445389	0.312577	0.533321	0.2752	0.254309	0.444635	0.330246	0.501098	0.320509	0.55409	0.215177	0.091703	0.19471	0.086255	0.077029	0.549302	0.404091	0.182498	0.191971	0.206872	0.150939	Function unknown	PREDICTED: uncharacterized protein LOC102587471 [Solanum tuberosum]
RHC12H2G1928.2.gene	3.71714	2.89097	4.83514	8.7216	9.48998	7.24023	3.02548	3.38284	3.89553	6.13416	8.41939	6.22407	2.93261	5.48502	2.42204	4.58343	6.26552	5.48624	8.48334	7.04885	6.86957	7.26786	6.46358	7.44492	--	PREDICTED: uncharacterized protein LOC107058417 [Solanum tuberosum]
RHC12H2G1923.2.gene	0.94156	0.517535	0.966637	1.01014	1.07126	0.834772	1.20255	1.33472	0.205119	0.757227	1.01841	0.422002	1.03601	0.750012	0.378126	1.08717	0.557896	0.519799	0.595699	0.589293	1.53853	1.21984	0.624316	0.392229	--	--
RHC12H2G1920.2.gene	2.99775	0.622489	4.46248	6.1901	5.53436	5.63303	2.02589	4.72051	4.37477	1.40726	4.05856	5.62913	2.96988	4.93841	4.03991	5.3004	5.06269	4.66087	6.48074	6.27017	5.14133	5.34154	5.85768	5.11784	Function unknown	PREDICTED: rhodanese-like domain-containing protein 8, chloroplastic isoform X1 [Solanum tuberosum]
RHC12H2G1919.2.gene	4.70021	5.43146	5.89499	9.19981	8.76328	8.85081	6.88228	5.93331	6.94536	7.93517	6.70216	7.2657	5.16263	7.7666	4.46071	6.26152	8.73705	8.05476	7.31885	7.76909	7.72201	6.21906	6.80923	7.20707	Function unknown	Rhodanese-like domain-containing protein 8, chloroplastic [Capsicum chinense]
RHC12H2G1914.2.gene	76.5406	76.0942	85.4693	52.9422	48.3211	43.806	67.8855	61.1778	65.3117	87.31	90.3239	87.7556	52.3724	87.0758	56.6808	60.2688	58.9937	60.1904	78.4212	83.9597	85.8512	50.5625	50.1101	48.7916	Signal transduction mechanisms	PREDICTED: serine/threonine-protein kinase STN7, chloroplastic [Solanum tuberosum]
RHC12H2G1911.2.gene	5.93442	5.30476	5.00838	7.1587	8.38966	6.88143	5.80884	6.36184	4.9043	6.70882	7.54654	7.34835	4.02222	7.80937	4.43024	5.19838	6.14646	6.32943	7.54402	8.17153	7.24782	6.74468	6.56868	6.16685	Function unknown	PREDICTED: WD repeat-containing protein 91 homolog isoform X4 [Solanum tuberosum]
RHC12H2G1898.2.gene	37.9125	39.7868	35.128	32.9333	31.8465	21.6098	42.7922	37.9081	33.3624	28.289	24.0267	28.7477	34.7098	28.2695	33.4491	30.7596	23.3857	27.1817	22.7799	24.2535	31.1061	23.058	29.7652	24.4013	Function unknown	PREDICTED: rhodanese-like domain-containing protein 11, chloroplastic isoform X1 [Solanum tuberosum]
RHC12H2G1892.2.gene	0.32961	0.473359	0.220018	0.326596	0.312863	0.398667	0.161531	0.181139	0.3518	0.307299	0.35653	0.172594	0.044188	0.387376	0.07248	0.097932	0.167849	0.205101	0.2303	0.341874	0.400844	0.381988	0.467351	0.239196	Replication, recombination and repair	PREDICTED: LOW QUALITY PROTEIN: DNA topoisomerase 1-like [Solanum tuberosum]
RHC12H2G1890.2.gene	5.7649	5.46436	7.23225	13.5058	13.1805	10.5146	4.58593	6.38017	4.92003	9.10906	7.42464	8.46754	3.86621	6.6024	3.87857	8.31392	7.31807	6.47417	8.55286	7.09378	8.52228	9.39438	11.2229	9.58458	Function unknown	PREDICTED: putative phosphatidylinositol N-acetylglucosaminyltransferase subunit C [Solanum tuberosum]
RHC12H2G1880.2.gene	2.61163	2.42258	2.14302	6.73473	5.93751	5.93156	0.970449	0.804214	0.875257	2.95046	2.74698	1.90739	1.3055	1.91703	0.883438	2.53664	1.82669	2.16588	2.06882	2.34553	2.30455	5.41534	6.39333	4.62342	Function unknown	PREDICTED: protein trichome birefringence-like 41 [Solanum tuberosum]
RHC12H2G1876.2.gene	31.1084	32.0496	31.1898	121.437	118.494	125.809	25.836	27.2228	25.5707	55.4111	54.6616	55.2737	28.2279	62.1453	22.9522	37.4239	40.7122	40.6674	56.9305	58.8219	57.3376	81.127	78.5355	83.8809	Energy production and conversion	plastidic ATP/ADP-transporter [Solanum tuberosum]
RHC12H2G1874.2.gene	42.5529	44.0622	43.049	18.7008	14.4471	16.4183	44.8225	45.9959	46.8015	26.7626	10.4988	25.2521	23.8183	13.6924	38.2594	30.4672	47.8187	35.2591	25.8807	19.1132	24.0864	28.7916	15.7627	28.4513	Energy production and conversion	PREDICTED: cytochrome c1-2, heme protein, mitochondrial-like [Solanum tuberosum]
RHC12H2G1871.2.gene	42.5322	43.6954	29.0918	0.750178	1.66023	2.4586	13.4077	12.6267	12.2821	8.20891	9.69843	12.6836	17.5342	12.2399	18.7413	3.34471	4.22556	2.83993	13.0141	11.0942	12.6198	0.303015	2.26146	2.29045	Replication, recombination and repair	PREDICTED: (6-4)DNA photolyase isoform X1 [Solanum tuberosum]
RHC12H2G1870.2.gene	41.675	39.6612	38.542	39.2332	35.2578	36.7757	28.7354	29.2156	26.8093	22.8315	28.039	22.5719	31.0828	25.9271	26.2001	25.2575	29.4968	17.1698	22.8919	26.5255	26.4559	32.5331	31.9555	41.9829	Posttranslational modification, protein turnover, chaperones	PREDICTED: putative cytochrome c oxidase subunit 5b-like [Solanum lycopersicum]
RHC12H2G1869.2.gene	10.0562	9.31051	11.3424	13.2394	10.9963	13.4168	5.03661	3.4053	2.69793	5.89589	6.68806	5.03089	5.21501	6.97492	4.4252	5.31581	6.64335	7.96854	8.06604	5.85885	5.46869	9.31671	10.256	8.94575	Function unknown	PREDICTED: acyl-protein thioesterase 2-like [Solanum lycopersicum]
RHC12H2G1868.2.gene	4.71633	4.55189	5.45266	4.07559	4.1335	5.21355	4.12962	4.13058	3.69238	4.7316	4.19301	3.62338	3.34374	5.33472	3.61614	4.96973	6.29346	6.32716	5.23717	4.99071	4.86054	3.3698	4.46832	4.12281	--	PREDICTED: uncharacterized protein LOC102578632 [Solanum tuberosum]
RHC12H2G1862.2.gene	28.0643	22.5127	31.8238	142.312	140.077	116.696	50.0131	40.1116	41.2362	77.4743	66.4072	67.9913	33.2963	66.4617	28.2364	133.911	174.839	117.531	64.6187	76.5361	79.3252	261.401	272.46	271.087	Function unknown	PREDICTED: uncharacterized protein LOC102579625 [Solanum tuberosum]
RHC12H2G1861.2.gene	5.49243	5.717	4.91315	5.74069	8.34125	6.76656	9.22425	9.41335	9.92912	6.30219	5.81613	6.07972	3.98774	5.88409	4.64933	6.34526	7.13692	7.85471	6.36201	6.27288	7.28148	5.10737	6.03067	5.79569	Function unknown	PREDICTED: protein TOO MANY MOUTHS [Solanum tuberosum]
RHC12H2G1860.2.gene	0.689862	0.484079	0.303014	1.08405	1.7879	0.895067	0.820792	0.853007	0.998071	0.504282	0.863143	1.24208	0.271587	1.15147	0.138961	1.45169	1.01605	1.13377	0.326012	1.26369	0.900179	2.19873	0.948923	0.995877	--	PREDICTED: uncharacterized protein LOC102579952 isoform X2 [Solanum tuberosum]
RHC12H2G1858.2.gene	32.0601	41.5897	32.0763	172.977	173.181	202.643	47.1852	49.5467	64.7603	95.0001	106.538	115.152	35.5805	95.9536	43.2542	139.13	61.8446	138.908	70.8167	85.3813	79.4278	296.969	300.074	314.44	Function unknown	PREDICTED: uncharacterized protein LOC102579625 [Solanum tuberosum]
RHC12H2G1857.2.gene	2.93836	3.57306	2.94684	3.46677	4.56052	4.02572	5.79122	5.90085	6.32885	3.62313	3.61177	3.67121	2.6644	3.51632	2.91982	3.49565	4.62617	4.30031	3.56448	3.7805	3.737	3.23288	3.73008	3.82969	Function unknown	PREDICTED: protein TOO MANY MOUTHS [Solanum tuberosum]
RHC12H2G1856.2.gene	0.747624	1.20101	0.48662	1.62288	2.17645	1.97253	0.59397	0.593353	0.694957	1.26496	1.40254	1.09429	0.2189	0.801541	0.298085	0.881798	1.00188	1.02272	0.968467	1.11473	1.25649	0.933366	2.12072	1.61584	--	PREDICTED: uncharacterized protein LOC102579952 isoform X2 [Solanum tuberosum]
RHC12H2G1855.2.gene	10.427	9.16116	5.98677	16.1885	16.4318	16.7829	8.88588	13.9469	8.0818	12.9162	12.9487	12.1805	7.17696	14.1362	8.46366	17.8704	18.0527	17.4948	14.4666	12.037	12.2888	12.9264	17.6896	13.8413	Intracellular trafficking, secretion, and vesicular transport	PREDICTED: signal recognition particle 54 kDa protein 2 [Solanum tuberosum]
RHC12H2G1854.2.gene	4.04976	4.0197	3.75737	3.73129	4.39738	4.60403	2.84813	2.70735	1.77361	3.42772	3.80413	1.59519	2.5038	2.54372	1.61887	4.79691	2.027	3.7773	1.9742	2.82706	4.38233	2.71603	5.37623	3.81382	Function unknown	PREDICTED: uncharacterized protein LOC102580609 [Solanum tuberosum]
RHC12H2G1853.2.gene	8.46225	10.0871	11.0122	12.0533	12.86	12.3531	6.44839	7.12077	7.74564	8.18996	7.70448	9.38838	5.11725	6.88352	4.86526	9.94856	8.07344	7.66422	9.94606	12.0048	9.21748	11.3536	11.2531	9.78412	Function unknown	PREDICTED: uncharacterized protein LOC102580609 [Solanum tuberosum]
RHC12H2G1849.2.gene	0.41998	0.294529	0.299749	0.67833	0.557854	0.595604	0.2223	0.592649	0.359495	0.652048	0.536384	0.558966	0.39052	0.747663	0.286732	0.607248	0.464595	0.466236	0.756701	0.577773	0.558868	0.430096	0.94503	0.470756	--	PREDICTED: F-box/FBD/LRR-repeat protein At1g13570-like isoform X2 [Solanum tuberosum]
RHC12H2G1848.2.gene	35.775	28.5074	6.9472	38.2208	4.78542	6.19022	12.6792	31.4406	21.2224	28.5416	8.24564	24.8203	13.0796	29.3403	15.9862	11.793	9.16255	3.24101	19.2474	28.8477	4.28342	11.8149	6.09634	0.855211	Translation, ribosomal structure and biogenesis	PREDICTED: 40S ribosomal protein S12 [Solanum lycopersicum]
RHC12H2G1846.2.gene	2.24775	1.88179	1.76795	0.865955	1.51119	1.31558	0.27517	0.512042	0.3479	0.654803	0.341069	0.577388	0.519112	0.982623	0.74268	0.155453	0.261295	0	1.07936	0.952665	0.928097	0.731954	0.597796	0.595354	Function unknown	PREDICTED: UDP-glycosyltransferase 73C3-like [Solanum tuberosum]
RHC12H2G1844.2.gene	2.39414	1.70378	2.0556	1.24232	1.08939	1.67346	1.2083	1.09947	1.15505	1.02686	1.75436	1.03843	1.93528	1.55949	1.35814	2.8926	1.64851	1.79102	1.66861	1.19161	1.37094	1.0375	1.66409	1.3414	Function unknown	PREDICTED: lamin-like protein [Solanum tuberosum]
RHC12H2G1843.2.gene	1.55551	0.807075	1.30529	4.99441	3.84864	4.74257	0.656533	1.17549	0.93997	2.80405	2.51192	3.65275	0.980719	2.04413	0.763318	3.29504	1.76094	1.58737	2.14132	3.58891	2.77145	2.8674	2.4368	2.01501	Signal transduction mechanisms	PREDICTED: probable protein phosphatase 2C 60 [Solanum tuberosum]
RHC12H2G1842.2.gene	1.77631	1.75333	2.12359	4.33257	4.59941	4.76404	36.3417	50.5526	37.8092	25.4876	28.1949	29.9984	163.536	26.1296	153.801	14.7558	13.8532	15.4697	27.5538	25.3331	22.2066	3.81173	3.9646	5.57775	Posttranslational modification, protein turnover, chaperones	PREDICTED: heat shock 70 kDa protein-like [Solanum tuberosum]
RHC12H2G1839.2.gene	0.782963	0.551609	0.24745	0.893443	1.18443	0.708942	0.150515	0.163991	0.140826	0.144283	0.081899	0.1268	0	0.178861	0.195098	0.642631	0.58249	0.79136	0.090027	0.225101	0.149937	1.17454	1.63324	2.12025	Secondary metabolites biosynthesis, transport and catabolism	PREDICTED: geraniol 8-hydroxylase-like [Solanum tuberosum]
RHC12H2G1836.2.gene	4.38017	4.53597	6.19503	6.33236	4.41527	5.30056	3.56309	4.46537	3.57534	3.75696	6.13045	3.44338	5.72463	3.91305	2.05884	4.16597	4.17243	4.60042	3.28063	4.16444	4.99915	5.04146	6.50133	5.32615	Function unknown	PREDICTED: uncharacterized protein LOC101255864 [Solanum lycopersicum]
RHC12H2G1835.2.gene	6.56708	6.26665	5.90662	10.706	8.91418	8.442	4.41771	5.06293	3.95708	6.50459	7.69889	7.20342	3.37414	5.84521	2.65775	7.08317	5.76743	5.08347	4.87074	6.25826	5.50197	8.31332	9.703	8.64758	Function unknown	PREDICTED: phosphatidylinositol-glycan biosynthesis class F protein-like [Solanum tuberosum]
RHC12H2G1831.2.gene	3.92216	3.03897	3.56682	2.53045	2.75616	2.54691	2.3334	1.39641	1.56635	4.97277	1.33324	2.53581	0.94086	2.98376	2.04732	1.44135	1.48378	1.92052	2.48113	3.41659	3.11845	1.91562	2.30327	1.37636	--	PREDICTED: uncharacterized protein LOC102586144 isoform X1 [Solanum tuberosum]
RHC12H2G1824.2.gene	0.571321	0.77357	0.749981	0.24876	0.311941	0.213946	0.380666	0.252873	0.186376	0.382127	0.338702	0.376508	0.160826	0.65524	0.222776	0.297177	0.28008	0.383566	0.513674	0.769711	0.407382	0.202294	0.23532	0.414368	Function unknown	PREDICTED: receptor-like protein 12, partial [Solanum tuberosum]
RHC12H2G1817.2.gene	7.43556	7.31127	6.91559	2.68828	2.82358	2.20589	2.95607	2.12116	2.88848	3.92943	3.80309	4.2043	1.85535	5.83889	1.93294	2.78817	2.47842	2.77142	6.3584	6.04085	5.23963	2.71671	2.46981	2.97469	Function unknown	PREDICTED: receptor-like protein 12 [Solanum tuberosum]
RHC12H2G1816.2.gene	0.455945	0	0	0	0	0	0	0	0	0	0	0	0	0	0	0	0	0	0	0	0	0	0	0	Function unknown	PREDICTED: bifunctional purple acid phosphatase 26-like [Solanum tuberosum]
RHC12H2G1815.2.gene	0.588284	0.440351	0.585609	0.284916	0.671124	0.361052	0.909363	0.590325	0.868829	0	0.876425	0.982326	0.474372	0.828082	0.687496	0.765977	0.786678	0.829368	0.487814	0.705906	0.953777	0	0.570176	0.713367	Function unknown	PREDICTED: UDP-N-acetylglucosamine transferase subunit alg13-like [Solanum tuberosum]
RHC12H2G1813.2.gene	0.259651	0.181278	0.251664	0.219545	0.091285	0.101051	0	0.037553	0	0	0	0	0.040642	0.20737	0	0.134056	0.10024	0.053704	0.092313	0	0	0	0.157202	0.045576	Secondary metabolites biosynthesis, transport and catabolism	PREDICTED: cytochrome P450 CYP736A12-like [Solanum tuberosum]
RHC12H2G1810.2.gene	3.40105	2.50849	3.76666	1.56611	1.61026	1.38712	2.58654	1.97028	1.96402	2.30787	2.84791	3.17172	1.31504	2.37028	1.53085	2.13689	2.04398	2.90901	3.74911	3.25393	3.17456	1.56703	1.46601	1.68455	--	PREDICTED: 4-coumarate--CoA ligase 2-like [Solanum tuberosum]
RHC12H2G1809.2.gene	1.48701	1.61601	2.07784	2.92816	3.44547	3.9074	2.81171	2.8844	2.16662	3.5253	3.60545	3.94209	1.99374	4.47084	2.36454	2.61709	2.67286	3.76893	4.0339	3.65583	3.77825	5.19872	3.21614	3.43754	Function unknown	PREDICTED: protein FRIGIDA-like [Solanum tuberosum]
RHC12H2G1808.2.gene	5.72265	5.24874	5.20689	6.34434	6.05472	5.62088	3.5258	3.42196	3.81707	3.85917	3.56319	3.97189	2.78909	6.42691	3.24016	5.14118	4.52765	4.70515	5.00782	4.0114	4.9606	5.75119	4.51258	7.34819	Signal transduction mechanisms	inositol polyphosphate multikinase isoform 1 [Solanum tuberosum]
RHC12H2G1807.2.gene	0.285431	0.37622	0.431456	0.95896	1.23798	1.07982	0.377281	0.19027	0.25042	0.584515	0.506978	1.17414	0.060339	0.80436	0.11681	0.50885	0.571599	0.626067	1.02215	0.600859	0.63994	0.890164	0.734364	0.803952	Function unknown	PREDICTED: pentatricopeptide repeat-containing protein At1g08070, chloroplastic-like [Solanum tuberosum]
RHC12H2G1803.2.gene	9.46659	9.38121	10.4981	8.64588	9.12499	8.28788	17.6128	20.3248	20.1202	20.4514	21.0409	19.6509	12.4486	23.9206	11.9959	20.5681	22.3296	19.7028	23.7225	25.749	27.0464	14.0824	11.8657	13.3042	Function unknown	PREDICTED: uncharacterized protein LOC102590754 [Solanum tuberosum]
RHC12H2G1801.2.gene	11.7522	10.213	11.2329	15.7095	17.7728	15.3149	11.0449	13.0605	10.5682	14.3927	13.6574	13.3888	8.12047	15.8551	9.00756	15.227	15.3187	15.2088	18.2099	15.7833	14.6945	18.4186	18.1902	17.1841	Function unknown	PREDICTED: probable beta-1,4-xylosyltransferase IRX10L [Solanum tuberosum]
RHC12H2G1794.2.gene	1.35866	0.91968	1.85857	1.69696	1.95361	2.28468	0.694577	0.804839	0.960162	1.57137	1.4903	1.02113	0.52006	1.34143	0.500571	1.27855	0.893363	0.930825	1.11177	1.35972	1.08587	1.33334	1.80563	1.23757	Amino acid transport and metabolism	PREDICTED: protein NRT1/ PTR FAMILY 8.3-like [Solanum tuberosum]
RHC12H2G1792.2.gene	9.58294	7.55875	8.35792	6.53948	8.05265	6.20184	4.64469	4.43959	5.1929	6.57222	5.18102	6.64482	3.43203	6.57986	3.51092	6.16503	5.65308	5.41724	6.20577	6.21013	7.18281	6.54686	5.26197	5.92298	Function unknown	PREDICTED: uncharacterized protein LOC102592668 isoform X2 [Solanum tuberosum]
RHC12H2G1790.2.gene	1.39087	2.11288	1.40051	5.05974	3.54367	4.58187	1.58008	1.08351	1.15155	1.48041	1.73278	1.22031	1.08506	1.43422	0.924027	2.92163	2.29648	2.2973	1.20382	1.38709	1.13136	4.07645	4.93455	3.66886	Intracellular trafficking, secretion, and vesicular transport	PREDICTED: ADP-ribosylation factor GTPase-activating protein AGD3-like isoform X2 [Solanum tuberosum]
RHC12H2G1789.2.gene	193.396	208.928	221.514	277.037	223.945	231.792	171.518	169.119	163.771	187.242	246.997	176.859	163.24	204.037	144.761	217.196	161.321	169.152	211.193	207.807	217.805	209.207	238.924	206.458	Translation, ribosomal structure and biogenesis	PREDICTED: 40S ribosomal protein S11 [Solanum lycopersicum]
RHC12H2G1788.2.gene	14.6075	13.7193	14.9347	11.1759	14.959	11.6678	9.64539	10.1016	8.76058	9.68527	12.0798	10.2988	8.98483	12.2259	7.47345	12.643	11.0518	8.9381	11.993	12.1626	11.862	13.6837	13.4593	9.98919	Transcription	PREDICTED: auxin response factor 2-like [Solanum tuberosum]
RHC12H2G1787.2.gene	204.836	196.498	172.173	142.382	150.972	157.759	174.729	189.043	189.756	190.968	162.255	188.212	171.96	215.682	173.952	151.1	181.687	178.947	191.136	218.104	196.794	149.188	132.13	154.672	Posttranslational modification, protein turnover, chaperones	PREDICTED: ATP-dependent Clp protease ATP-binding subunit ClpA homolog CD4B, chloroplastic [Solanum tuberosum]
RHC12H2G1785.2.gene	35.4653	34.3017	36.3273	24.7424	26.552	25.204	21.6612	21.4896	22.7654	23.218	25.8812	22.7324	22.776	29.5516	20.3921	22.8711	18.6608	19.4621	24.3465	26.8522	26.1263	15.7645	17.6705	16.1231	Function unknown	protein NEOXANTHIN-DEFICIENT 1 [Solanum lycopersicum]
RHC12H2G1779.2.gene	3.23232	3.47138	3.03191	2.84458	3.2294	2.06317	2.88217	2.89891	2.56342	2.31438	2.91645	3.06106	1.74037	4.00746	1.45663	1.37905	2.79634	3.71263	5.00277	3.657	3.63264	1.54572	1.08859	1.40787	Function unknown	glucan endo-1,3-beta-glucosidase 12-like precursor [Solanum tuberosum]
RHC12H2G1778.2.gene	9.5979	9.77602	7.01023	0	6.67434	6.30908	5.77252	5.248	4.18414	8.80349	6.29784	7.5689	2.32795	5.94069	6.50897	9.02185	5.63258	7.59286	6.09402	6.05349	5.90224	5.82746	0.855806	2.70033	Posttranslational modification, protein turnover, chaperones	PREDICTED: geranylgeranyl transferase type-2 subunit beta 1 [Solanum lycopersicum]
RHC12H2G1777.2.gene	5.07414	5.26626	8.35638	11.2472	11.0175	8.39918	2.80348	3.57541	3.64022	5.88613	7.71996	6.56955	0	6.00739	3.11567	7.70028	8.30905	11.0738	5.5526	6.99402	7.58739	8.21588	10.4551	9.12734	Function unknown	PREDICTED: protein C2-DOMAIN ABA-RELATED 4-like [Solanum tuberosum]
RHC12H2G1774.2.gene	48.9991	44.8666	55.3218	11.59	11.0549	10.4714	20.035	19.3748	17.3907	1.99621	2.82521	2.55904	23.2944	2.38098	29.5424	61.317	58.3019	58.3642	1.84096	2.69641	2.70842	53.3176	57.3432	53.3873	Function unknown	PREDICTED: phosphomethylethanolamine N-methyltransferase-like [Solanum tuberosum]
RHC12H2G1765.2.gene	26.5689	18.2816	22.902	18.2706	17.4809	16.5699	14.2733	15.4182	11.158	16.5732	14.8087	14.6859	12.0134	13.8327	12.9913	14.9945	15.3369	15.5909	19.2961	16.4611	14.491	18.835	19.9166	18.4535	Signal transduction mechanisms	PREDICTED: mitogen-activated protein kinase 9-like [Solanum tuberosum]
RHC12H2G1764.2.gene	0.888182	1.13774	1.34194	0.547948	0.695005	0.440197	0.396266	0.418779	0.549234	0.462768	0.522943	0.165928	0.478257	0.267994	0.120741	0.205759	0.528452	0.45579	0.617431	0.653357	0.337382	0.413855	0.373582	0.142531	Carbohydrate transport and metabolism	PREDICTED: beta-glucosidase 44-like isoform X2 [Solanum lycopersicum]
RHC12H2G1761.2.gene	16.8971	17.2911	16.8368	11.8181	11.4484	11.5671	11.0528	11.2865	13.1931	11.813	10.6649	11.1975	9.08684	12.735	8.90609	11.3221	10.5892	11.4104	13.6328	13.6509	12.7748	10.8425	11.0219	10.7497	Function unknown	PREDICTED: guanine nucleotide-binding protein subunit beta-like protein isoform X1 [Solanum lycopersicum]
RHC12H2G1760.2.gene	1.56107	1.46249	1.81002	4.59047	3.93073	3.57442	1.53025	1.12996	1.17285	1.58866	2.26225	2.55054	1.29805	1.79136	1.15086	2.21665	2.08083	3.07962	2.4662	2.42533	2.19865	3.45087	4.07719	3.02913	Intracellular trafficking, secretion, and vesicular transport	PREDICTED: peroxisome biogenesis protein 3-2-like [Solanum tuberosum]
RHC12H2G1758.2.gene	14.5513	14.0711	15.8935	7.58708	6.80018	6.80201	8.35772	9.41935	8.82368	10.1422	10.8003	10.5016	6.17316	9.74086	7.26858	10.1835	10.2358	8.58744	12.3655	12.5172	9.38933	8.19096	7.39179	9.81811	Function unknown	PREDICTED: uncharacterized protein LOC101245139 [Solanum lycopersicum]
RHC12H2G1745.2.gene	0.772882	0.719612	0.523616	0.686672	0.77636	0.744029	0.630014	0.460822	0.463972	0.747664	0.879397	0.336643	0.286152	1.05402	0.524967	0.569883	0.592529	0.916798	0.941791	0.707893	0.731817	0.9385	0.990669	0.612939	Signal transduction mechanisms	PREDICTED: probable receptor-like protein kinase At1g67000 [Solanum tuberosum]
RHC12H2G1744.2.gene	3.88001	2.7134	4.01441	4.27326	4.55278	4.2206	2.13832	2.56706	2.45626	3.49486	2.99657	2.86931	2.96117	3.67571	3.19941	4.09766	5.54898	4.65657	3.23957	3.35412	2.48548	4.2876	4.58356	5.97942	Signal transduction mechanisms	PREDICTED: probable serine/threonine-protein kinase At1g18390 isoform X2 [Solanum tuberosum]
RHC12H2G1737.2.gene	0.309114	0.256963	0.075626	0.430499	0.343281	0.632394	0.134188	0.191212	0.085455	0.249154	0.315496	0.179346	0.089693	0.657532	0.100231	0.037633	0.13584	0.230611	0.219413	0.861927	0.544205	0.293117	0.143369	0.158581	Function unknown	PREDICTED: protein SAR DEFICIENT 1-like [Solanum tuberosum]
RHC12H2G1736.2.gene	5.5626	6.41043	5.48861	6.27172	6.74304	6.68588	5.04221	4.7437	4.80205	6.52299	5.59386	5.67132	2.93989	5.56156	3.15264	5.83491	6.5282	5.63545	6.47162	6.03467	6.15069	7.19142	7.69483	7.80086	Translation, ribosomal structure and biogenesis	PREDICTED: HBS1-like protein [Solanum tuberosum]
RHC12H2G1735.2.gene	4.60994	4.67852	7.22065	9.41284	7.34081	7.57971	4.07327	3.48589	3.09542	5.39329	5.9751	4.81504	2.37351	4.84531	2.96308	4.58673	3.55327	4.46212	4.80734	4.87447	3.7405	5.65038	6.33577	5.31904	Translation, ribosomal structure and biogenesis	PREDICTED: 40S ribosomal protein S7 [Solanum tuberosum]
RHC12H2G1734.2.gene	1.05949	0.194743	0.317278	2.42324	0.876279	0.933433	1.87975	0.17625	1.52936	0.733112	1.08026	0	0.243667	0.312497	0.521605	1.31163	1.92952	0.860764	0.869291	0.32692	0	1.76307	1.56462	2.38374	Transcription	PREDICTED: transcription factor BEE 1-like [Solanum tuberosum]
RHC12H2G1729.2.gene	2.43312	2.55956	2.67842	3.6036	4.31673	3.38211	2.13951	3.6865	3.02898	4.17947	2.82473	3.32285	1.74531	3.47014	1.80445	3.44036	2.34946	2.84729	3.44022	2.47323	3.61117	2.85449	4.04505	3.87623	Function unknown	PREDICTED: uncharacterized protein LOC102602402 [Solanum tuberosum]
RHC12H2G1722.2.gene	11.5301	7.37461	8.49047	13.4113	14.9415	17.7388	23.0022	15.9263	14.3471	11.5336	20.3681	19.8029	28.7792	10.4474	24.4281	9.88259	8.55059	8.74997	12.502	10.2283	15.8633	10.6187	11.4611	9.5793	Function unknown	PREDICTED: uncharacterized protein LOC102601407 isoform X2 [Solanum tuberosum]
RHC12H2G1719.2.gene	0.595544	0.780183	1.17596	1.42388	1.30688	1.71668	0.746249	0.260702	0.243452	0.857277	0.070915	1.20024	0.298383	0.826806	0.232029	0.264404	0.797042	0.497569	0.884514	0.831707	0.971334	1.36335	1.02745	1.95836	--	--
RHC12H2G1715.2.gene	0.316432	0.27028	0.216794	1.04589	0.87002	0.730393	0.115151	0.167128	0.028682	0.544599	0.569382	0.408378	0.128696	0.556912	0.072046	0.214253	0.224628	0.154021	0.713845	0.416584	0.63654	0.438515	0.327475	0.438498	Cytoskeleton	PREDICTED: kinesin-like protein KIN-14G [Solanum lycopersicum]
RHC12H2G1714.2.gene	40.9825	40.0668	51.537	49.121	46.3485	56.8701	38.322	33.8295	44.4348	46.9647	53.0435	48.147	35.2887	49.3347	39.6101	50.555	48.1891	55.6249	57.2286	57.0047	53.5209	59.7443	58.594	63.2151	Lipid transport and metabolism	PREDICTED: NADH dehydrogenase [ubiquinone] 1 beta subcomplex subunit 10-A-like [Solanum tuberosum]
RHC12H2G1707.2.gene	56.7206	54.4195	57.431	39.5932	35.5038	31.9392	24.4892	22.1306	24.7651	25.4717	34.973	24.0429	15.0116	25.2593	16.8857	27.1626	20.7359	19.1967	27.3329	36.2098	29.0741	19.5529	20.2039	18.9463	Function unknown	PREDICTED: uncharacterized protein LOC102601342 [Solanum tuberosum]
RHC12H2G1704.2.gene	9.53225	7.98096	7.80378	5.90658	8.16052	5.74408	6.65616	6.29676	4.77082	5.94358	5.57946	8.19139	4.75665	6.81667	6.62674	7.40006	6.88563	7.04012	5.28333	6.12212	5.77872	8.54505	8.44252	7.01631	Translation, ribosomal structure and biogenesis	PREDICTED: peptidyl-tRNA hydrolase, mitochondrial [Solanum tuberosum]
RHC12H2G1703.2.gene	19.2876	18.2503	19.2445	31.4617	29.9157	35.9656	17.5334	19.469	18.3136	27.9336	33.0633	25.7804	15.091	26.2777	15.3561	21.5177	26.4625	20.9441	29.4117	28.8816	32.2093	31.3228	32.3752	30.9308	Cytoskeleton	PREDICTED: actin-related protein 4 [Solanum tuberosum]
RHC12H2G1670.2.gene	12.6642	12.4303	12.9961	19.7635	17.3412	16.0638	16.6293	15.0844	16.0554	11.3274	11.4727	9.29823	9.81867	12.7761	9.47235	21.8292	21.9646	22.5962	12.5158	9.99649	11.564	24.0139	24.1663	23.3451	Signal transduction mechanisms	PREDICTED: serine/threonine-protein kinase 16 [Solanum tuberosum]
RHC12H2G1669.2.gene	30.3925	27.6973	31.4732	9.96115	12.7115	12.822	11.6632	10.5056	13.6056	9.53873	8.02612	8.20083	19.9168	9.70257	22.6198	4.69592	10.8132	9.97217	10.1086	8.742	12.78	12.7011	10.0676	7.32693	Amino acid transport and metabolism	PREDICTED: agmatine deiminase [Solanum tuberosum]
RHC12H2G1668.2.gene	65.0757	64.8846	96.1029	114.286	107.7	106.589	63.2063	60.2803	71.2318	110.625	116.409	85.8527	55.2792	104.681	55.0725	66.3148	54.911	68.7571	115.698	126.275	103.827	96.059	95.6061	83.3598	Translation, ribosomal structure and biogenesis	PREDICTED: H/ACA ribonucleoprotein complex subunit 2-like protein [Solanum tuberosum]
RHC12H2G1657.2.gene	1.57035	1.36778	0.563414	3.54562	3.35142	2.70842	2.70426	2.39776	2.51996	2.64423	1.17815	2.29344	1.18576	0.657191	0.978813	2.13701	2.40796	1.39238	1.16996	2.18113	1.51936	2.32021	1.65033	1.59204	Carbohydrate transport and metabolism	PREDICTED: protein STRICTOSIDINE SYNTHASE-LIKE 11-like [Solanum lycopersicum]
RHC12H2G1656.2.gene	7.96729	4.65145	2.36403	5.90503	8.7941	5.06135	5.25206	6.00236	4.25423	3.66925	3.3014	4.29261	3.02544	1.97066	4.39252	2.5356	6.32174	4.20155	1.76221	4.29115	4.53896	5.01643	4.09982	4.73375	Carbohydrate transport and metabolism	PREDICTED: protein STRICTOSIDINE SYNTHASE-LIKE 12-like [Solanum tuberosum]
RHC12H2G1654.2.gene	0.271103	1.22869	0.392276	1.99518	0.638758	0.378113	1.31429	0.020819	1.53333	0.598036	2.48778	0.131421	0.101276	0.089997	0.736045	2.142	2.14733	0.964795	0.099585	2.27082	0.57064	2.0912	0.474903	2.45345	Function unknown	PREDICTED: uncharacterized protein LOC101249684 [Solanum lycopersicum]
RHC12H2G1653.2.gene	3.73018	3.68282	3.47477	10.947	10.8765	8.1184	2.95155	2.99726	2.32904	5.44372	5.69539	5.42005	3.15476	5.47087	2.96111	6.1925	5.28679	6.18117	5.69089	4.96093	5.39143	10.8016	12.0715	11.5308	Function unknown	PREDICTED: serine/threonine-protein phosphatase 7 long form homolog [Solanum tuberosum]
RHC12H2G1648.2.gene	8.22432	20.2515	23.1224	19.3874	16.6246	6.33954	11.6768	13.4734	11.9528	14.2927	12.9518	14.5283	13.6826	14.4607	14.0334	11.5033	14.912	13.675	9.82831	14.2632	17.778	15.6258	13.5285	12.8308	Lipid transport and metabolism	PREDICTED: probable acyl-activating enzyme 17, peroxisomal [Solanum tuberosum]
RHC12H2G1647.2.gene	8.11804	4.66442	8.6631	9.65972	9.09471	9.55989	19.9244	12.5299	1.91975	7.27549	9.62173	10.0753	6.12418	7.22202	4.34657	10.9345	9.25342	2.02603	8.23503	10.6335	12.4487	9.74421	8.78569	4.34302	Transcription	PREDICTED: protein Dr1 homolog [Solanum tuberosum]
RHC12H2G1645.2.gene	4.24495	3.61414	3.89184	4.32418	4.76973	5.84673	4.59238	3.30675	4.10629	3.41287	3.219	3.39059	5.89774	4.0499	4.46459	4.20263	4.01251	4.91089	3.72238	4.43075	4.60007	4.55528	3.62484	5.39395	Replication, recombination and repair	PREDICTED: single-stranded DNA-binding protein, mitochondrial [Solanum tuberosum]
RHC12H2G1643.2.gene	6.52879	7.0085	5.99321	8.57179	9.80764	8.84908	9.84559	10.2367	9.25793	10.0515	9.75208	9.64883	9.724	9.69425	9.86445	10.1971	9.83078	9.12016	10.794	9.92868	11.0999	10.7594	9.99784	10.8373	Translation, ribosomal structure and biogenesis	PREDICTED: translation initiation factor eIF-2B subunit delta-like [Solanum tuberosum]
RHC12H2G1628.2.gene	9.0262	6.96414	7.59473	8.69532	14.9927	15.4617	8.17574	12.8083	12.2909	11.4102	10.089	12.119	9.35321	10.1755	6.36186	7.38897	10.1213	9.40838	7.46803	15.2385	10.5625	10.8835	11.7105	7.64646	Signal transduction mechanisms	PREDICTED: cyclin-dependent kinase E-1 [Solanum tuberosum]
RHC12H2G1627.2.gene	5.20731	7.68845	7.74473	1.77385	2.41556	2.71278	5.05834	3.95726	2.62765	4.37672	4.41879	2.45603	1.61267	2.4578	3.35867	2.22341	2.089	3.83589	5.82759	2.96403	4.13613	1.76339	1.9038	1.54343	Function unknown	PREDICTED: caffeoyl-CoA O-methyltransferase 6-like [Solanum tuberosum]
RHC12H2G1624.2.gene	8.03315	6.44127	8.51675	11.9056	9.59975	10.5011	3.75685	4.75604	4.54883	6.70733	7.94326	6.97419	2.69309	7.62968	3.26451	7.68189	6.27705	6.62022	7.37927	6.41361	7.57388	8.77933	10.23	7.8737	Function unknown	PREDICTED: uncharacterized protein LOC107012150 [Solanum pennellii]
RHC12H2G1603.2.gene	5.62955	6.51563	5.39126	7.57467	8.07643	8.00614	9.25878	7.31703	6.74034	8.80831	8.14174	8.70458	4.96312	10.4525	4.71543	7.51223	9.18243	7.66474	7.76683	7.57519	9.65552	10.4398	10.2289	9.80686	Function unknown	PREDICTED: uncharacterized protein LOC102603145 [Solanum tuberosum]
RHC12H2G1600.2.gene	0.440996	0.348891	0.371811	0.415934	0.361371	0.344751	0.211365	0.243956	0.189927	0.437143	0.338066	0.248288	0.154246	0.316116	0.175923	0.392889	0.209572	0.246602	0.413554	0.301298	0.25467	0.481953	0.386762	0.349266	Function unknown	PREDICTED: zinc finger BED domain-containing protein RICESLEEPER 2-like [Nicotiana attenuata]
RHC12H2G1599.2.gene	325.525	327.448	361.552	639.171	560.417	600.621	343.122	316.985	293.015	544.959	677.642	521.202	314.851	655.131	278.77	394.209	328.415	336.001	678.618	643.707	702.353	447.824	480.359	444.114	Translation, ribosomal structure and biogenesis	PREDICTED: 40S ribosomal protein S19-3 [Solanum lycopersicum]
RHC12H2G1591.2.gene	5.52008	6.26897	6.73808	8.35234	7.45301	7.19134	2.23704	2.61245	1.7151	5.34725	4.41165	4.96675	1.39224	4.25445	1.54341	5.55012	4.56845	5.24453	5.02654	3.50303	5.96159	6.04656	5.87891	5.33026	Lipid transport and metabolism	PREDICTED: diacylglycerol kinase 1 [Solanum tuberosum]
RHC12H2G1589.2.gene	1.69606	2.27962	1.55387	2.93525	2.23099	3.66845	1.59134	1.10418	0.864881	2.37723	2.3701	2.39624	1.52771	1.69401	0.878111	1.66747	1.62662	1.2153	2.07343	1.45986	1.0125	2.29952	2.49785	2.02363	Function unknown	PREDICTED: plant intracellular Ras-group-related LRR protein 7-like isoform X1 [Solanum tuberosum]
RHC12H2G1575.2.gene	4.17251	4.28311	4.40473	8.58207	4.02789	5.6397	5.50172	5.0531	1.89086	5.76931	5.74828	5.11412	2.86362	3.05436	2.5929	9.15724	1.90812	4.94774	5.69427	5.31374	4.97409	4.99659	5.74388	5.22505	Transcription	PREDICTED: trihelix transcription factor GT-1-like isoform X1 [Solanum tuberosum]
RHC12H2G1571.2.gene	5.16625	5.7805	4.60415	7.0683	5.22961	5.6975	3.90538	4.32968	3.63934	3.39176	3.50431	3.25689	4.79568	5.03902	4.38192	3.33947	4.63703	4.62256	4.09853	4.35786	6.11273	3.84458	3.79234	4.84355	Posttranslational modification, protein turnover, chaperones	PREDICTED: pachytene checkpoint protein 2 homolog [Solanum tuberosum]
RHC12H2G1565.2.gene	2.20673	4.00648	2.29773	8.28121	7.53078	7.85424	5.23857	4.11143	2.50529	6.88742	5.57068	6.97152	3.41203	4.7484	1.91969	5.07849	3.50121	5.90977	5.73161	6.85378	5.22488	7.2249	7.2653	5.49183	--	--
RHC12H2G1564.2.gene	0.473584	0.881342	1.14922	2.98081	2.36004	2.37521	1.01261	1.91375	1.14121	1.81772	1.09922	1.09261	0.19146	3.28709	0.311358	1.60224	1.29192	0.754245	2.33499	1.14193	2.02329	1.82104	2.4185	2.7533	--	--
RHC12H2G1552.2.gene	5.48619	4.9445	4.9627	8.32204	8.10718	8.21562	3.12412	2.36182	3.30506	8.60247	6.31311	6.20852	1.76053	5.76453	1.85746	5.28034	3.92374	3.0734	5.20619	5.47189	6.1723	6.17801	8.6575	6.46549	Energy production and conversion	hypothetical protein SDM1_3t00007 [Solanum demissum]
RHC12H2G1545.2.gene	5.55741	4.71061	4.44161	8.32072	6.82511	9.99147	3.04178	3.50633	3.05636	5.60171	5.90508	6.68879	4.47922	6.92035	4.93306	4.81492	4.52219	5.21737	6.90703	6.70256	6.43208	6.20945	6.69505	7.39188	Function unknown	PREDICTED: exportin-4 [Solanum tuberosum]
RHC12H2G1541.2.gene	13.5753	13.1309	13.8394	13.2715	16.4114	13.2236	7.09641	7.9718	7.93145	12.3531	12.4411	12.574	4.66719	11.8243	4.65339	7.91853	11.6663	9.26511	10.8741	10.7349	13.6008	11.9641	13.6072	11.1998	Function unknown	PREDICTED: filament-like plant protein 3 isoform X2 [Solanum tuberosum]
RHC12H2G1531.2.gene	1.78905	2.33324	1.16959	3.29371	3.55603	3.17866	1.65175	0.959423	0.849239	1.59807	2.4689	2.23489	0.632861	2.00419	0.365175	0.464077	0.988816	2.30962	1.872	1.61327	2.29307	3.71927	2.10934	1.5228	--	PREDICTED: inositol hexakisphosphate and diphosphoinositol-pentakisphosphate kinase 2 isoform X3 [Solanum tuberosum]
RHC12H2G1522.2.gene	8.70617	5.99448	8.15918	8.5261	7.32475	8.37969	4.34709	6.17981	6.58052	8.47925	7.69939	7.29456	5.0088	9.6846	6.22531	6.12828	10.3069	6.61096	10.7498	10.4019	7.04304	6.74173	6.5581	6.6243	Transcription	PREDICTED: mediator of RNA polymerase II transcription subunit 25-like [Solanum tuberosum]
RHC12H2G1518.2.gene	0.37495	0.419526	0.292045	0.287117	0.435395	0.131717	0.148252	0.368685	0.244407	0.251966	0.440163	0.369949	0.088304	0.500716	0.80133	0.178181	0.288749	0.499157	0.345608	0.212052	0	0.296103	0.224717	0.308109	Translation, ribosomal structure and biogenesis	PREDICTED: fatty acid amide hydrolase-like [Solanum tuberosum]
RHC12H2G1516.2.gene	3.30268	3.74694	2.6245	7.50055	4.58465	6.50603	4.14547	3.18671	3.64627	6.45963	7.5504	5.05334	2.49649	5.25874	2.84719	4.92038	5.14583	5.10473	5.89865	5.45137	6.16359	8.16948	6.74709	4.83559	RNA processing and modification	PREDICTED: cleavage stimulation factor subunit 50 isoform X1 [Solanum tuberosum]
RHC12H2G1511.2.gene	6.07686	6.244	4.20271	5.35531	5.89848	4.15535	2.56282	2.88764	2.75851	5.9326	4.02295	5.24565	1.35363	5.41725	1.14203	2.51488	2.96848	3.23635	5.71926	5.01419	3.45561	3.79875	2.92672	2.63666	--	PREDICTED: squamosa promoter-binding-like protein 6 [Solanum tuberosum]
RHC12H2G1498.2.gene	9.25635	7.77891	8.49421	11.9905	10.8111	10.9639	8.0518	8.28901	7.92763	6.74146	8.40644	9.34347	7.12765	9.67063	4.97953	8.48146	11.8344	13.1322	11.1289	9.64284	11.6157	11.8433	9.96562	9.01682	Function unknown	PREDICTED: RHOMBOID-like protein 12, mitochondrial isoform X1 [Solanum tuberosum]
RHC12H2G1497.2.gene	7.52207	7.52074	8.01572	7.24188	6.59989	6.52622	6.55836	7.62354	6.36807	7.19014	6.70355	6.31081	8.41081	6.96451	8.32568	5.86967	8.04816	8.53382	7.09733	6.31881	7.92944	6.41158	7.25129	6.83504	Function unknown	PREDICTED: uncharacterized protein LOC102580549 [Solanum tuberosum]
RHC12H2G1495.2.gene	8.72329	9.00115	10.7301	11.8751	12.7387	12.8912	7.91657	9.61951	9.61762	6.96625	7.76634	7.67932	8.13447	7.75399	7.93551	10.9281	12.2885	11.1071	9.32038	7.43256	8.99813	8.92444	11.6431	8.75189	Function unknown	PREDICTED: uncharacterized protein At1g04910-like [Solanum tuberosum]
RHC12H2G1488.2.gene	16.9557	17.0101	15.4576	27.1694	25.0871	19.9835	14.4645	12.9023	13.8246	25.013	27.0613	23.9949	15.0246	22.7922	14.0137	19.5177	17.2161	19.0048	23.9012	21.8288	25.8074	27.3896	28.552	17.5413	Carbohydrate transport and metabolism	PREDICTED: uncharacterized protein LOC101266398 [Solanum lycopersicum]
RHC12H2G1483.2.gene	3.02785	3.62169	2.72863	2.00333	1.82237	1.288	5.1236	5.3729	4.49355	2.33811	2.75967	3.09594	1.36657	2.2576	1.98796	3.75739	3.57269	2.44586	1.98171	2.61528	2.13225	1.8873	2.20127	2.60233	--	PREDICTED: acetyl-CoA-benzylalcohol acetyltransferase-like [Solanum lycopersicum]
RHC12H2G1481.2.gene	11.5029	10.0227	12.102	9.68919	9.96279	9.24205	3.19838	3.12	3.22708	12.0216	11.1904	10.9598	1.94791	10.6836	3.14954	4.60949	3.02211	4.1517	9.70993	11.3292	10.3629	5.58197	7.40078	6.1081	Function unknown	PREDICTED: topless-related protein 1-like isoform X2 [Solanum tuberosum]
RHC12H2G1477.2.gene	10.5905	6.61497	8.5726	15.2758	14.9266	12.6358	14.2911	13.9395	13.6327	8.69266	7.53099	10.2246	8.33409	5.8579	7.86725	13.6989	17.179	11.3538	4.68215	7.03093	6.52366	15.8921	12.5789	15.066	Carbohydrate transport and metabolism	PREDICTED: protein STRICTOSIDINE SYNTHASE-LIKE 11-like [Solanum lycopersicum]
RHC12H2G1457.2.gene	2.83519	2.4236	1.96025	8.0841	5.82398	7.0675	2.42583	2.54976	3.72472	4.40137	5.2503	4.73738	1.66559	3.96494	1.23954	3.92623	4.46513	4.04327	3.99189	3.77395	4.89123	5.52556	6.08204	6.77969	Function unknown	PREDICTED: probable DNA double-strand break repair Rad50 ATPase isoform X1 [Solanum tuberosum]
RHC12H2G1452.2.gene	27.6877	30.465	31.2887	79.0694	78.243	69.7125	37.7262	37.0082	35.8127	68.1403	91.568	61.4891	31.1032	61.4591	27.3009	61.3745	59.0116	61.222	53.3165	47.8412	56.4263	77.3977	82.8218	79.3417	Function unknown	PREDICTED: uncharacterized protein LOC102602206 [Solanum tuberosum]
RHC12H2G1449.2.gene	5.6769	4.2511	4.61046	6.90527	6.65289	5.63938	4.49432	5.00053	4.47673	5.67388	6.01272	5.78072	3.00093	6.09284	3.33654	4.93576	5.71844	6.31136	5.61962	5.77288	5.92684	5.90663	6.80814	6.80611	Function unknown	PREDICTED: probable xyloglucan 6-xylosyltransferase 5 [Solanum tuberosum]
RHC12H2G1441.2.gene	7.13949	8.10392	8.16686	8.94581	12.145	14.3756	8.18619	9.22242	3.12456	8.41473	8.96114	12.1852	7.55925	8.03489	3.77132	8.55601	14.7788	15.4	7.44753	8.52883	8.46145	5.25518	12.6296	12.0199	Function unknown	PREDICTED: protein NEN1-like [Solanum tuberosum]
RHC12H2G1440.2.gene	46.4978	44.9097	54.3009	57.1327	59.2659	59.0572	53.2207	50.252	48.4436	51.3282	57.377	51.6799	48.4511	49.8707	48.0417	59.8058	56.1642	56.2355	59.4877	57.4263	54.2765	68.4893	65.8218	65.2833	Posttranslational modification, protein turnover, chaperones	hypothetical protein BC332_30737 [Capsicum chinense]
RHC12H2G1439.2.gene	76.1824	94.0476	93.612	128.003	120.798	122.638	84.3833	74.0433	80.9774	81.3206	100.133	91.8767	75.8204	87.1963	65.4877	88.4531	86.0808	84.0727	68.5232	95.0402	80.7941	91.8667	101.07	81.4401	Function unknown	PREDICTED: photosynthetic NDH subunit of subcomplex B 4, chloroplastic isoform X1 [Solanum tuberosum]
RHC12H2G1437.2.gene	0.359798	0.681877	0.532609	0.231589	0.55806	0.271739	0.27561	0.184124	0.425745	0.457431	0.19529	0.722849	0.719136	0.285647	0.329712	0.256798	0.17333	0.196824	0.571823	0.267103	0.61643	0.369392	0.541717	0.160174	Defense mechanisms	PREDICTED: ABC transporter C family member 12-like isoform X9 [Solanum tuberosum]
RHC12H2G1436.2.gene	4.60109	5.09243	5.25205	5.84051	5.13366	5.4467	2.22221	1.88422	2.00378	3.26627	3.33229	3.4317	2.08181	4.35924	2.75496	2.80328	3.12296	3.62352	3.97099	4.28695	4.42992	4.35412	4.28937	4.35628	Defense mechanisms	PREDICTED: ABC transporter C family member 12-like isoform X6 [Solanum tuberosum]
RHC12H2G1435.2.gene	4.25572	4.38031	3.34012	4.34321	3.8299	4.44609	1.81075	1.52676	0.868533	2.65821	1.30114	2.0959	2.50236	1.91607	2.92783	2.49086	3.07701	2.29049	2.21678	2.46922	3.06863	2.85869	3.55958	2.04897	Defense mechanisms	PREDICTED: ABC transporter C family member 12-like isoform X4 [Solanum tuberosum]
RHC12H2G1417.2.gene	14.0573	21.3041	14.2223	22.7485	22.0612	16.5723	11.3141	11.0074	10.288	14.8341	21.0968	14.7859	10.729	19.8785	10.7242	16.7783	13.469	8.44166	16.466	19.7266	19.8512	21.7829	16.1175	15.8606	Transcription	PREDICTED: nuclear transcription factor Y subunit C-9-like [Solanum tuberosum]
RHC12H2G1414.2.gene	6.15508	6.11208	6.03051	2.22555	2.79723	2.69982	2.11673	2.44465	2.08706	0.922436	1.1125	0.513563	1.87717	5.31943	1.95108	1.0433	0.428355	0.463127	5.58176	4.81123	5.45141	0.654549	0.703174	1.23846	Translation, ribosomal structure and biogenesis	PREDICTED: eukaryotic translation initiation factor 2 subunit gamma-like [Capsicum annuum]
RHC12H2G1409.2.gene	1.51015	2.50529	2.97926	3.4488	3.4362	2.67243	2.23306	1.77842	1.42704	2.26997	2.43338	2.87845	0.569812	3.38971	0.622991	2.07126	2.7001	2.73164	3.02997	2.17935	3.0936	1.62446	1.09026	1.59615	Function unknown	PREDICTED: GDSL esterase/lipase At5g14450-like [Solanum tuberosum]
RHC12H2G1401.2.gene	0.361959	0.339552	0.565646	2.9141	1.52524	0.664685	1.20279	1.20573	1.29539	1.53777	0.990435	1.33956	1.29401	1.20859	0.877777	1.49482	1.54495	2.07393	1.61439	1.83935	0.586806	1.79663	2.48603	1.8902	--	--
RHC12H2G1394.2.gene	6.425	8.42721	6.73269	5.67118	7.26387	14.1469	7.54724	5.25913	4.98408	7.90673	6.29384	8.04383	5.58413	5.10413	3.22313	6.09695	8.38656	6.73763	6.63761	9.55194	8.77895	6.30182	11.5979	9.01689	Function unknown	PREDICTED: peptidyl-tRNA hydrolase 2, mitochondrial-like [Solanum tuberosum]
RHC12H2G1381.2.gene	0.385993	0.31905	0.267595	0.100341	0.107097	0.068788	0.078693	0.194018	0.093813	0	0	0.055212	0	0.14613	0	0.128573	0.07833	0.178893	0.133515	0	0	0.073686	0.043641	0.034366	Function unknown	PREDICTED: uncharacterized protein LOC107862039 [Capsicum annuum]
RHC12H2G1375.2.gene	4.43968	3.8954	6.38441	4.28859	3.60383	5.0211	3.16574	3.24141	2.44678	2.24509	3.63146	2.74303	2.80388	3.23646	4.53713	4.17574	3.93954	3.79898	4.25044	4.24989	5.64159	5.14245	3.71935	4.93398	Signal transduction mechanisms	PREDICTED: cyclin-dependent kinases regulatory subunit 1-like [Solanum tuberosum]
RHC12H2G1365.2.gene	17.2452	15.4498	17.4652	15.1629	12.7874	13.5954	10.5188	12.1456	9.96273	9.7532	9.6082	10.8062	11.4906	10.6307	9.99243	15.2456	11.8566	12.5556	9.66822	9.15832	11.1499	12.5053	15.3205	12.3296	Defense mechanisms	PREDICTED: ABC transporter B family member 26, chloroplastic [Solanum tuberosum]
RHC12H2G1359.2.gene	27.2493	26.5619	26.6215	29.297	28.5745	29.2014	23.5541	25.1532	23.2539	25.9746	24.3286	28.8595	23.4579	26.5198	23.3208	24.6211	25.8982	25.3563	31.421	28.1251	27.4963	26.6515	25.0132	27.608	Intracellular trafficking, secretion, and vesicular transport	PREDICTED: nuclear pore complex protein NUP54 [Solanum tuberosum]
RHC12H2G1355.2.gene	7.80823	7.04847	7.67588	12.2803	12.0051	12.9448	6.47687	6.16287	5.7301	8.00857	9.45178	8.66402	4.7889	9.82467	5.37927	7.01038	7.3537	7.24102	9.29458	8.50441	9.22124	10.8145	12.2748	12.2982	Function unknown	PREDICTED: uncharacterized protein LOC102600551 isoform X1 [Solanum tuberosum]
RHC12H2G1353.2.gene	2.75717	2.95194	2.45096	4.05971	5.54449	4.04411	2.62953	2.23209	1.99417	2.95526	3.25178	2.71715	2.376	2.6408	1.90805	3.82072	3.74354	3.0124	2.97168	2.71098	3.31067	4.00435	4.61842	3.82609	Function unknown	PREDICTED: endoplasmic reticulum metallopeptidase 1 isoform X1 [Solanum tuberosum]
RHC12H2G1345.2.gene	20.4674	20.5094	14.9659	18.9716	14.9515	23.1278	18.5864	23.1889	13.3234	18.8499	23.7888	20.0621	17.8215	17.6866	20.2778	13.3287	14.5205	17.3781	15.6765	19.6054	19.155	13.7973	16.8062	14.1641	Inorganic ion transport and metabolism	PREDICTED: uncharacterized protein LOC102601227 isoform X1 [Solanum tuberosum]
RHC12H2G1341.2.gene	1.86887	1.82901	1.8717	1.93905	2.68545	1.72904	1.0722	0.345708	0.547927	1.18681	1.41491	1.05562	0.346239	1.8193	0.394054	0.708421	1.14305	0.994404	1.5662	0.879565	1.03999	0.974686	1.22727	1.46582	Posttranslational modification, protein turnover, chaperones	PREDICTED: AAA-ATPase ASD, mitochondrial-like [Solanum tuberosum]
RHC12H2G1340.2.gene	1.03892	1.03931	1.56313	3.44848	3.51814	3.52766	1.22041	1.18733	1.04849	2.45708	2.79047	2.58554	0.674445	2.2057	0.955097	1.40331	1.32589	1.63869	1.68884	1.42611	1.45274	2.36197	2.74822	2.4408	Transcription	PREDICTED: uncharacterized protein LOC104226766 isoform X1 [Nicotiana sylvestris]
RHC12H2G1339.2.gene	0.341927	0.327736	0.418319	1.73845	0.769031	0.790586	0.14244	0.115828	0	0.5398	1.11213	0.683951	0.287046	0.921443	0.309205	0.208406	0.409882	0.341081	0.66177	0.616447	0.670966	0.229267	0.794065	0.709577	Function unknown	PREDICTED: probable myosin-binding protein 5 isoform X1 [Solanum tuberosum]
RHC12H2G1338.2.gene	13.6366	13.0317	15.5054	21.3121	19.8929	14.092	17.0222	13.0763	8.60539	18.3206	16.3708	13.576	10.3683	17.8506	10.2005	14.8501	13.5546	12.8323	17.4001	14.301	15.942	15.1416	17.0365	16.139	Function unknown	PREDICTED: serine/arginine-rich splicing factor 4 isoform X2 [Solanum tuberosum]
RHC12H2G1328.2.gene	3.92508	3.89397	4.51783	14.367	16.5329	13.2862	5.94242	4.26471	4.44379	10.0027	9.3898	7.81145	3.20426	10.7812	2.45269	9.91861	6.44843	6.89667	7.17712	9.62849	7.81853	9.23365	11.9202	13.5087	--	--
RHC12H2G1327.2.gene	0.68413	1.85651	1.80437	3.53321	3.93625	4.22665	1.94311	1.59409	1.23237	2.0708	3.34865	3.30303	0.962268	2.3489	1.33543	3.96739	2.0016	2.05449	2.06949	2.21947	3.76711	3.59741	3.6153	3.9438	--	--
RHC12H2G1311.2.gene	0.557678	0.900927	0.182294	0.554565	1.13839	0.417714	0.5864	0.396751	0.456158	0.270553	1.15013	0.807237	0.144198	0.948154	0.229832	0.541563	0.845957	0.359108	0.296722	0.870337	0.609913	1.21941	1.35109	0.694849	Translation, ribosomal structure and biogenesis	hypothetical protein F511_04564 [Dorcoceras hygrometricum]
RHC12H2G1299.2.gene	9.27258	10.4688	7.77422	12.8673	12.2671	12.2923	9.1429	7.32132	9.44018	8.31133	6.76834	9.69124	9.51601	7.76154	6.71908	8.47856	11.4214	10.3422	8.71048	8.85879	8.18031	11.1736	12.6912	10.1358	Posttranslational modification, protein turnover, chaperones	PREDICTED: protease Do-like 9 [Solanum tuberosum]
RHC12H2G1291.2.gene	8.34722	8.55561	4.58563	8.89289	6.63599	5.90081	3.96263	3.72877	3.54411	8.8397	10.454	9.58666	3.93392	10.1174	6.788	8.46703	9.80199	9.57689	10.777	8.75563	10.7443	9.17084	8.56708	9.19036	Nucleotide transport and metabolism	PREDICTED: nucleobase-ascorbate transporter 6-like [Solanum tuberosum]
RHC12H2G1262.2.gene	0.318575	0.210197	0.094446	0	0.075046	0.205918	0.073635	0.248127	0.216079	0.214357	0.085918	0.261707	0.206473	0.252957	0	0.157509	0.16109	0.138796	0.146624	0.17631	0	0.123972	0.269279	0.170761	Replication, recombination and repair	putative ribonuclease H-like domain-containing protein [Helianthus annuus]
RHC12H2G1261.2.gene	3.2204	3.88435	4.31043	1.58118	1.31107	1.73354	3.25876	2.21803	2.55675	2.29309	2.94257	2.41118	2.16542	2.5385	3.14683	2.2636	2.15077	1.73919	2.77893	2.14651	2.51834	1.2101	1.78385	1.84965	Function unknown	PREDICTED: uncharacterized protein LOC107778192 [Nicotiana tabacum]
RHC12H2G1253.2.gene	3.93363	4.09333	4.13248	5.12176	6.36562	5.4467	4.47351	4.17289	4.90946	5.72742	5.02925	5.141	3.5135	5.19637	3.3161	5.64795	5.21639	6.05976	4.88128	5.92463	5.95657	5.06862	5.25611	6.63271	--	PREDICTED: uncharacterized protein LOC102602002 [Solanum tuberosum]
RHC12H2G1241.2.gene	8.48868	9.32272	8.90652	7.62257	6.48861	5.16331	3.68968	3.81006	5.24704	5.60967	5.4552	6.53255	5.32807	6.9108	3.57659	4.18555	4.20617	6.06999	6.02313	5.79925	6.57731	7.7573	6.37101	5.6953	Transcription	PREDICTED: calmodulin-binding transcription activator 4-like isoform X1 [Solanum tuberosum]
RHC12H2G1237.2.gene	55.0743	48.4336	52.7534	47.7783	57.3103	44.1873	34.1962	32.6925	35.4509	49.5109	55.0124	49.4329	42.2287	51.1775	39.2302	33.2085	30.7275	35.5505	60.1456	52.5836	53.8156	38.8987	40.355	36.6047	Function unknown	PREDICTED: CBS domain-containing protein CBSCBSPB3 [Solanum tuberosum]
RHC12H2G1228.2.gene	7.10875	8.00028	5.40783	6.61446	5.77927	8.16841	5.00022	5.63641	4.93505	7.40449	7.58243	5.10655	5.49953	6.44535	3.74978	4.91557	6.4395	7.91004	7.69765	5.74614	8.02768	5.7333	5.41507	7.47133	Transcription	PREDICTED: RNA polymerase II C-terminal domain phosphatase-like 3 [Solanum tuberosum]
RHC12H2G1202.2.gene	1.54947	1.13504	1.21254	2.95972	4.67073	3.73267	0.628635	1.03299	0.6933	1.49558	1.71317	1.644	0.878749	1.90297	0.455056	2.99578	2.11556	2.56195	1.40023	1.80171	1.76346	3.36106	3.74949	4.12989	Carbohydrate transport and metabolism	PREDICTED: HIPL1 protein-like isoform X1 [Solanum tuberosum]
RHC12H2G1201.2.gene	22.0574	25.2059	25.648	15.5773	15.0441	13.867	18.8295	18.3275	19.4541	16.1642	17.5312	19.2532	18.1721	14.3174	15.0609	17.9955	16.7053	12.998	15.9678	17.9126	14.628	12.288	11.5877	12.2575	Posttranslational modification, protein turnover, chaperones	PREDICTED: glutathione S-transferase U17-like [Solanum tuberosum]
RHC12H2G1195.2.gene	1.09206	1.2019	2.33162	3.27475	3.17326	2.78059	2.16325	2.92312	1.97143	2.05122	2.25407	1.97459	2.22249	2.38755	2.23222	1.63298	1.52092	1.25628	4.03892	4.16692	2.86734	1.76271	2.06044	2.96823	Function unknown	PREDICTED: uncharacterized protein LOC102599985 isoform X1 [Solanum tuberosum]
RHC12H2G1193.2.gene	5.39308	5.65292	4.45852	7.89477	9.8236	7.82987	5.41929	4.22059	3.84444	12.62	13.1851	10.6136	3.45278	10.2752	2.51544	10.2268	8.70934	9.97655	10.3929	10.1618	11.9041	12.982	10.5242	10.9949	Lipid transport and metabolism	PREDICTED: beta-amyrin synthase-like [Solanum tuberosum]
RHC12H2G1190.2.gene	1.1217	1.35532	1.68231	1.87413	2.24793	2.51905	2.01446	1.64664	1.5957	2.75537	2.0668	2.85726	1.81715	2.91257	1.56605	1.99278	1.88799	2.4204	2.42727	2.59691	2.37096	2.2286	2.07793	1.73482	Replication, recombination and repair	PREDICTED: uncharacterized protein LOC107829467 [Nicotiana tabacum]
RHC12H2G1189.2.gene	4.10627	2.58337	3.62359	0.726051	1.93603	1.93115	0.805531	0.790663	0.051289	1.49638	1.45284	1.2773	0.733238	1.98904	1.10868	1.53707	2.43574	3.09915	2.25289	1.80028	1.55654	3.00458	3.37922	2.59646	--	PREDICTED: WAT1-related protein At1g09380-like [Solanum tuberosum]
RHC12H2G1188.2.gene	3.31361	3.46561	2.85995	1.42192	2.52256	1.05427	0.925434	2.72959	2.72977	3.19941	3.01698	2.75465	1.28817	3.70688	1.55698	3.62453	2.106	3.06094	3.81384	3.54505	2.95334	3.1513	0.813695	2.93978	Translation, ribosomal structure and biogenesis	PREDICTED: LOW QUALITY PROTEIN: ribonuclease P protein subunit p29-like [Solanum tuberosum]
RHC12H2G1187.2.gene	11.9065	11.7547	12.7081	15.463	16.6895	17.3134	11.4432	8.91845	11.5592	14.9869	16.2152	17.3277	10.7745	14.9661	10.2335	12.543	9.46139	12.1856	15.7842	15.1778	15.9593	17.6804	14.3238	13.6543	Function unknown	PREDICTED: WD repeat-containing protein 82-B [Solanum tuberosum]
RHC12H2G1185.2.gene	4.62697	3.46165	3.45071	4.23573	5.06815	4.45998	2.54044	1.8641	2.30143	4.16309	3.93698	4.05739	1.24653	4.44667	0.392879	2.34559	3.46877	3.18829	4.65236	3.58667	3.15096	3.69021	2.47785	3.51662	Replication, recombination and repair	PREDICTED: uncharacterized deoxyribonuclease YabD isoform X4 [Solanum tuberosum]
RHC12H2G1184.2.gene	0.496615	0.652124	0.836864	0.309152	0.851791	0.814822	0.123155	0.319714	0.35883	0.442155	0.21284	0.969785	0.242634	0.404222	0.345593	0.697048	0.090638	0.505321	0.433711	0.609427	0.512396	0.706636	0.461055	0.245265	Replication, recombination and repair	hypothetical protein CARUB_v10003775mg [Capsella rubella]
RHC12H2G1182.2.gene	5.3464	5.06565	5.40019	6.34342	6.7435	6.83873	4.38071	4.79895	4.49507	5.32908	5.03041	5.17756	3.46182	5.96868	3.26565	5.34557	5.43438	5.91979	5.63855	5.6484	5.34866	6.0224	6.31639	5.80632	Function unknown	PREDICTED: zinc finger CCCH domain-containing protein 41-like [Solanum tuberosum]
RHC12H2G1181.2.gene	12.9423	13.5289	13.9063	14.359	17.3828	15.2434	14.5438	14.1878	13.6078	15.0086	12.2854	13.7342	10.365	16.5249	10.8701	15.5607	17.9186	17.3937	16.4574	15.2165	14.3511	17.1221	16.7363	18.927	--	PREDICTED: putative uncharacterized protein DDB_G0294196 [Solanum tuberosum]
RHC12H2G1174.2.gene	6.55515	9.05393	6.85133	4.79624	2.53167	3.62983	4.55608	4.94918	5.00244	3.29505	3.61747	3.15478	3.93279	3.92261	4.74041	6.44688	3.15615	6.87669	4.8297	4.05514	3.85488	3.70545	3.36824	3.877	Amino acid transport and metabolism	PREDICTED: anthranilate phosphoribosyltransferase, chloroplastic-like [Solanum tuberosum]
RHC12H2G1173.2.gene	160.575	172.402	158.833	550.508	576.127	561.419	186.449	209.603	187.007	518.262	495.531	511.996	188.161	607.711	188.508	249.577	276.44	260.622	589.613	572.209	583.966	392.567	395.131	406.039	Replication, recombination and repair	PREDICTED: ATP-dependent RNA helicase-like protein DB10 isoform X1 [Solanum tuberosum]
RHC12H2G1172.2.gene	182.484	180.721	197.711	170.075	160.724	166.379	164.64	160.358	167.069	147.736	160.833	149.458	169.851	172.089	141.208	153.415	144.764	142.895	177.628	180.491	184.82	148.533	150.739	146.095	Translation, ribosomal structure and biogenesis	PREDICTED: 60S ribosomal protein L18-2 [Solanum tuberosum]
RHC12H2G1170.2.gene	56.489	54.139	54.0945	37.6636	42.6826	41.3139	42.9439	45.0468	51.4205	46.9418	49.5734	44.1631	43.2666	47.4877	47.8879	43.4082	49.2408	50.5355	55.0551	48.3318	61.9359	42.9798	50.8001	48.913	Signal transduction mechanisms	PREDICTED: shaggy-related protein kinase epsilon [Solanum tuberosum]
RHC12H2G1169.2.gene	25.1538	25.5589	34.6585	37.6104	30.6417	40.5642	29.2107	32.7368	27.7058	30.3261	43.793	35.6875	27.598	31.3507	33.2563	28.4067	31.5377	37.0889	32.592	35.2542	30.1619	30.7316	35.5729	39.4547	Function unknown	PREDICTED: universal stress protein A-like protein [Solanum tuberosum]
RHC12H2G1163.2.gene	0.278339	0.287991	0.586594	0.385091	0.914835	0.327695	0.249428	0.136012	0.017892	0.255792	0.428454	0.156627	0.060994	0	0.257078	0.468645	0.37219	0.385524	0.006465	0.347749	0.359226	0.498412	0.569071	0.128133	--	--
RHC12H2G1160.2.gene	29.0397	27.29	27.5085	32.6681	34.4794	35.3311	31.4466	32.7366	34.4856	32.9443	31.2333	32.5224	30.1664	36.5869	34.2179	31.4873	33.179	31.8504	38.0174	33.9883	36.1857	31.9399	30.2749	31.2367	Signal transduction mechanisms	PREDICTED: phosphoglucan phosphatase LSF1, chloroplastic isoform X2 [Solanum tuberosum]
RHC12H2G1157.2.gene	39.4524	36.5912	36.7149	37.1481	31.3843	35.0665	27.7687	27.7321	24.9722	33.2593	36.9946	31.2127	24.2536	34.9598	22.3692	39.5621	33.2016	25.6385	73.3237	32.608	41.5267	29.1965	35.1837	32.6648	Signal transduction mechanisms	PREDICTED: serine/threonine-protein kinase STY8-like [Solanum tuberosum]
RHC12H2G1156.2.gene	7.4745	8.45118	7.02741	6.80979	9.33676	7.49679	5.04841	5.86769	4.79365	7.99721	6.61176	5.37008	5.17378	6.40184	4.82042	7.13262	6.48307	6.04926	7.11853	7.89239	5.44024	6.99744	6.75634	6.98199	Posttranslational modification, protein turnover, chaperones	PREDICTED: protease Do-like 9 [Solanum tuberosum]
RHC12H2G1155.2.gene	0.922332	0.761996	0.157921	1.99515	2.93076	2.29961	2.73731	3.45235	1.57916	1.40711	1.67919	1.85203	0.977217	1.94147	0.414032	2.09904	2.26273	2.00792	1.49913	1.19093	1.20171	1.31606	2.56991	2.14537	--	--
RHC12H2G1150.2.gene	3.01125	3.44883	4.09487	7.97631	9.22394	8.30421	3.08618	2.69214	1.91359	2.28838	3.05091	3.23251	1.4867	4.29159	1.65894	2.64146	3.3776	3.85186	2.84084	4.70775	3.62891	6.21476	9.44208	5.33369	Function unknown	PREDICTED: microtubule-associated protein 70-1-like isoform X1 [Solanum tuberosum]
RHC12H2G1149.2.gene	13.126	12.2041	10.5363	15.5125	18.4236	15.2766	8.21092	8.90319	9.75104	11.2539	9.981	12.1731	9.7987	13.2861	8.22694	8.28533	8.18958	8.84545	13.2784	13.3877	13.1259	10.9653	10.0048	9.4391	Replication, recombination and repair	PREDICTED: DNA gyrase subunit B, chloroplastic/mitochondrial [Solanum tuberosum]
RHC12H2G1148.2.gene	17.1201	19.4039	15.1641	20.7422	18.9232	18.2531	18.0064	13.2394	13.9164	23.366	22.1696	19.3271	10.7238	22.1956	7.02088	16.2493	16.8148	16.4457	20.5076	23.3952	24.8006	10.1011	17.8216	15.561	Signal transduction mechanisms	PREDICTED: dual specificity protein phosphatase 12-like [Solanum tuberosum]
RHC12H2G1147.2.gene	3.59116	5.73009	4.64308	8.40284	8.60871	5.17646	4.04913	5.18016	4.98794	4.78223	7.26594	7.11491	4.00736	7.41634	2.56697	5.74745	6.19198	6.48417	4.60194	7.111	4.92706	8.94126	8.41626	7.29261	Energy production and conversion	PREDICTED: electron transfer flavoprotein-ubiquinone oxidoreductase, mitochondrial [Solanum tuberosum]
RHC12H2G1145.2.gene	5.91506	5.93007	6.08755	5.89378	8.83078	6.91429	5.7389	5.77868	5.33679	9.32043	7.11585	7.13849	4.71699	10.3766	4.00235	6.52984	6.85127	8.55936	6.23517	9.12546	9.72363	6.57249	7.12935	6.31685	Cell wall/membrane/envelope biogenesis	PREDICTED: 3beta-hydroxysteroid-dehydrogenase/decarboxylase isoform 3 [Solanum tuberosum]
RHC12H2G1143.2.gene	2.93328	2.76275	3.26247	2.61147	3.73868	2.62842	2.13459	2.51142	1.56198	2.86523	2.34691	1.7225	1.14081	1.52938	1.17173	2.39413	2.21222	2.48295	2.36842	2.13796	2.93996	2.77487	2.70209	3.34404	Replication, recombination and repair	PREDICTED: putative SWI/SNF-related matrix-associated actin-dependent regulator of chromatin subfamily A member 3-like 1 [Solanum tuberosum]
RHC12H2G1142.2.gene	6.08767	6.40744	6.93937	10.9543	11.2005	12.3614	3.71878	4.94362	5.20409	8.29079	7.83925	7.0486	4.66928	9.8608	3.45637	7.25306	6.72213	5.34688	11.2529	7.29676	8.89813	10.1944	8.87354	9.29955	Function unknown	PREDICTED: pentatricopeptide repeat-containing protein At1g80270, mitochondrial [Solanum tuberosum]
RHC12H2G1133.2.gene	1.16435	1.13189	1.00208	2.14463	1.96949	1.65354	1.391	1.32599	0.885378	1.85177	1.99432	1.77141	0.714984	1.11535	0.814013	1.08483	0.808088	0.602257	0.806901	1.03672	1.12666	1.52382	1.69708	1.42683	--	--
RHC12H2G1132.2.gene	37.4992	38.5092	41.54	33.5276	37.2792	35.5854	26.4954	35.4823	26.6138	41.7809	38.2782	38.8007	25.3428	39.7075	24.501	32.5055	36.9189	32.2907	44.6298	38.4931	38.8317	31.9073	34.7288	33.0699	Function unknown	PREDICTED: arginine/serine-rich coiled-coil protein 2 [Solanum tuberosum]
RHC12H2G1131.2.gene	23.3861	22.7649	25.0216	21.8057	24.7428	20.9948	14.2563	18.8648	15.249	20.0999	19.0094	20.0069	13.83	18.5676	12.7615	15.1774	15.962	16.7831	21.2876	21.0448	21.4659	20.2124	18.1865	18.2018	Function unknown	PREDICTED: protein SMG7-like isoform X1 [Solanum tuberosum]
RHC12H2G1128.2.gene	8.78069	10.6276	7.96978	10.6775	7.01028	8.10988	7.21765	8.27935	6.88779	9.47897	8.60628	12.1692	10.4561	11.7189	13.4712	12.9964	10.4069	15.7388	9.39914	11.0838	11.3412	10.1713	9.88443	10.1438	Function unknown	glycosylphosphatidylinositol-anchored beta-1,3 glucanase-like protein precursor [Solanum lycopersicum]
RHC12H2G1126.2.gene	4.24403	3.16287	2.88663	15.0258	14.3096	14.3812	4.26223	3.70199	4.25535	6.23872	8.19472	4.36684	3.39573	8.29387	4.63002	9.18764	7.14249	9.27912	7.06391	7.00947	6.3412	16.4179	17.8635	9.84606	Function unknown	PREDICTED: serine/threonine-protein phosphatase 7 long form homolog [Solanum tuberosum]
RHC12H2G1125.2.gene	9.97542	9.68498	9.76841	10.7036	11.3184	11.6968	9.53869	9.91503	8.74414	12.0731	8.41909	10.0361	8.16716	11.6436	8.93943	10.2696	12.5058	12.0443	10.186	11.6208	11.8189	10.7436	12.2426	11.0498	Transcription	PREDICTED: general negative regulator of transcription subunit 3 isoform X2 [Solanum tuberosum]
RHC12H2G1118.2.gene	3.13212	1.55617	1.12361	1.63926	1.62614	1.93857	2.56422	2.07896	2.47812	1.21635	2.03326	1.9414	1.57583	1.97238	2.41466	2.23116	2.14308	2.46999	2.85697	1.38307	1.93446	1.12859	1.89264	0.934511	Energy production and conversion	PREDICTED: cytochrome f-like [Capsicum annuum]
RHC12H2G1113.2.gene	6.79365	5.76976	4.60976	4.47206	5.15569	3.13965	3.38835	2.64307	3.21453	3.64369	5.7466	3.79898	3.6915	4.69616	3.44003	3.21519	2.82074	3.60905	4.21762	4.93374	3.34022	4.14147	3.66809	4.04973	Translation, ribosomal structure and biogenesis	PREDICTED: putative tRNA pseudouridine synthase isoform X1 [Solanum tuberosum]
RHC12H2G1112.2.gene	3.0591	2.73644	2.10401	3.45195	2.26747	3.67119	0.949401	1.19906	1.16895	3.54962	3.06378	2.63543	1.31043	2.36069	1.39472	1.78204	1.71493	2.21293	2.04633	1.71258	2.05155	2.10942	2.90145	1.99129	--	--
RHC12H2G1111.2.gene	8.94085	8.31345	8.79354	44.2498	47.1694	24.3481	10.0994	10.5459	8.50068	28.8119	32.2109	16.1934	5.55502	16.4713	6.83334	12.6443	10.3423	14.0233	13.597	15.0797	15.6945	33.6542	16.235	16.8363	--	PREDICTED: uncharacterized protein LOC102594114 isoform X2 [Solanum tuberosum]
RHC12H2G1105.2.gene	22.3225	27.4423	19.5691	27.4879	33.4857	30.0044	21.14	19.7692	22.5999	23.7959	24.8906	29.8313	13.2462	25.006	12.9308	31.8075	45.5152	25.253	27.3977	32.8743	25.2805	29.1491	37.7576	29.478	Function unknown	polypyrimidine tract-binding protein homolog 3-like [Solanum tuberosum]
RHC12H2G1104.2.gene	78.7714	77.3935	86.9812	46.2107	48.9419	45.1228	86.9273	88.8193	86.3842	113.406	108.746	112.911	62.0025	117.23	60.6765	47.8658	46.0711	48.5123	111.705	115.088	106.849	39.2562	40.9463	38.2992	Posttranslational modification, protein turnover, chaperones	PREDICTED: thioredoxin-like 1-1, chloroplastic [Solanum tuberosum]
RHC12H2G1103.2.gene	9.88252	8.47394	9.66249	6.04964	6.48839	6.0682	8.17809	9.03537	9.51324	7.67538	9.40227	7.18516	11.9106	8.41781	12.0504	6.83662	6.59618	8.64486	9.01623	10.356	10.9549	6.14929	6.0911	7.03062	Carbohydrate transport and metabolism	aquaporin SIP1-2-like [Solanum tuberosum]
RHC12H2G1096.2.gene	1.9197	2.51306	2.51754	4.62572	6.11921	6.21706	1.51875	1.80169	1.69837	3.40624	4.19938	3.39836	1.24711	2.42221	0.94356	3.47067	2.38297	3.25138	2.61598	2.95506	2.77004	5.46404	4.0475	3.99429	Amino acid transport and metabolism	PREDICTED: serine carboxypeptidase-like 13 [Solanum tuberosum]
RHC12H2G1095.2.gene	374.29	373.048	402.218	103.849	91.724	93.5742	436.189	361.023	448.452	189.904	251.786	209.862	260.68	194.652	272.359	380.162	296.71	351.08	189.152	226.213	196.254	228.961	224.257	216.743	Function unknown	PREDICTED: uncharacterized protein LOC102595503 [Solanum tuberosum]
RHC12H2G1093.2.gene	4.145	4.82184	4.99338	4.13868	2.96944	4.85406	2.19388	2.16119	1.99031	4.19329	3.59844	3.33926	1.74792	4.05663	2.08564	2.18525	2.6573	3.08862	4.2717	5.0082	6.58512	1.28371	3.75626	4.51173	Function unknown	PREDICTED: acyl-coenzyme A thioesterase 9, mitochondrial-like isoform X1 [Solanum tuberosum]
RHC12H2G1092.2.gene	7.89038	6.5758	7.45693	12.2948	12.4782	14.4292	4.50493	5.18579	5.15472	6.87261	5.65288	6.68102	3.51663	6.16843	3.57271	7.23626	7.48115	7.61595	7.91377	5.09296	5.76936	10.3747	8.73066	9.10685	Function unknown	PREDICTED: formin-like protein 2 [Solanum tuberosum]
RHC12H2G1091.2.gene	15.0638	14.2704	13.4953	21.4344	18.9937	16.6983	15.2901	17.1236	15.5758	16.2217	17.3547	15.7307	13.3168	19.1528	12.9412	17.7734	15.8149	16.1334	20.3646	16.7845	17.4879	16.209	18.0666	18.0682	Function unknown	PREDICTED: protein FAM133 [Solanum tuberosum]
RHC12H2G1090.2.gene	17.8982	18.7089	19.3233	14.9262	18.1364	14.6044	13.4738	12.0814	15.5473	15.9433	12.3195	16.0133	15.1202	15.8317	13.2315	13.7263	16.8377	13.8606	18.8585	13.3578	16.6268	15.3023	16.441	16.5033	Signal transduction mechanisms	mitogen-activated protein kinase homolog NTF4-like [Solanum tuberosum]
RHC12H2G1083.2.gene	8.08503	8.57226	9.64096	11.4747	11.7655	10.7184	6.96643	7.14511	5.40302	6.79583	6.89608	6.48781	5.45756	8.30032	5.81153	8.66542	8.63038	7.50779	8.56334	7.28074	8.39581	11.7906	13.7124	12.1194	Signal transduction mechanisms	PREDICTED: serine/threonine-protein kinase STY17-like isoform X2 [Solanum tuberosum]
RHC12H2G1082.2.gene	0.503977	0	0.134719	0.333439	0	0.113573	0	0	0	0	0	0.214269	0	0.101162	0	0.193198	0.017506	0.127828	0.464835	0	0	0.012071	0	0	--	PREDICTED: uncharacterized protein LOC108946890 [Nicotiana tomentosiformis]
RHC12H2G1077.2.gene	1.99022	1.69667	1.77027	25.1007	27.365	28.2526	2.07066	2.33096	1.95683	5.94161	4.88281	6.12174	1.79439	5.6484	1.81836	15.1261	14.8706	17.2697	4.0295	5.03818	5.42832	43.4465	38.1171	37.631	Defense mechanisms	PREDICTED: protein DETOXIFICATION 29-like [Solanum tuberosum]
RHC12H2G1075.2.gene	6.84035	8.30636	7.64091	8.45837	10.3011	11.0392	5.37609	6.31664	6.01262	8.66838	6.36213	6.71094	7.04577	9.70457	6.8388	6.33282	6.69551	7.52195	9.0901	10.0928	8.04121	10.1522	8.46265	8.44072	Amino acid transport and metabolism	PREDICTED: acetolactate synthase small subunit 1, chloroplastic-like [Solanum tuberosum]
RHC12H2G1074.2.gene	7.19899	10.4373	8.15533	11.9411	11.555	10.7762	4.46315	6.09056	4.85531	8.40155	7.47532	8.35375	3.21248	10.3253	3.36431	5.70872	5.87101	5.97546	10.8973	9.50445	9.9164	9.835	12.4172	11.7278	Function unknown	PREDICTED: pentatricopeptide repeat-containing protein At2g37230 [Solanum tuberosum]
RHC12H2G1059.2.gene	16.165	14.5946	13.4724	15.1221	18.6351	15.8314	16.6258	15.3381	15.1022	10.7456	9.96267	11.6998	13.6444	16.1381	12.6745	14.0945	18.2522	14.8231	11.7179	14.9424	13.3726	14.2047	13.5026	13.4399	Translation, ribosomal structure and biogenesis	PREDICTED: valine--tRNA ligase, chloroplastic/mitochondrial 2 isoform X1 [Solanum tuberosum]
RHC12H2G1057.2.gene	8.64468	5.99375	9.75998	9.51228	8.69612	9.8984	8.43397	8.76152	9.05933	12.0781	11.6775	9.53867	6.17434	14.1203	8.418	12.5187	8.96737	10.0281	11.2912	10.5638	13.6554	10.5774	10.1927	10.6281	Function unknown	PREDICTED: ankyrin repeat-containing protein At5g02620-like [Solanum tuberosum]
RHC12H2G1052.2.gene	2.90052	3.82624	4.46194	4.27446	2.81097	2.40212	4.36734	5.60005	5.61	3.49844	2.74978	4.16336	3.74783	4.24231	3.02925	3.32548	3.36102	4.18186	3.99222	3.51202	3.18858	3.25	3.46764	2.48448	Coenzyme transport and metabolism	PREDICTED: 2-phytyl-1,4-beta-naphthoquinone methyltransferase, chloroplastic [Solanum tuberosum]
RHC12H2G1051.2.gene	6.58417	5.46684	3.82291	7.25813	8.50172	7.19775	5.06787	5.88356	5.80153	7.11236	7.01647	5.69741	5.11446	5.79295	4.14771	8.1358	8.4647	8.34631	7.64697	6.03872	5.47277	9.1933	7.83255	10.0882	Function unknown	PREDICTED: la-related protein 6B-like [Solanum pennellii]
RHC12H2G1050.2.gene	1.13116	0.798689	1.64595	1.93591	2.54675	1.14154	2.16927	1.4096	1.46684	1.88654	2.41506	2.66204	1.38239	2.05725	1.2611	2.67841	2.66383	2.48721	2.02842	2.41538	2.83113	2.02675	2.64077	2.75087	Nucleotide transport and metabolism	PREDICTED: probable uridine nucleosidase 2 [Solanum tuberosum]
RHC12H2G1049.2.gene	3.09831	4.26028	3.79432	5.88779	4.2241	4.49299	4.11042	4.12906	3.05235	4.83654	4.74264	4.64013	3.01803	6.44256	2.80471	5.37017	5.87749	5.62406	4.78842	5.43299	5.48749	4.84905	5.14073	4.98991	Nucleotide transport and metabolism	PREDICTED: probable uridine nucleosidase 2 [Solanum tuberosum]
RHC12H2G1047.2.gene	0.978534	1.20298	0.803335	0.484572	0.696376	0.849977	0.458176	0.474899	0.643393	0.45441	0.303887	0.520777	0.460169	0.743421	0.383347	0.560582	1.04577	1.01519	0.840169	0.871254	0.843376	0.936013	0.656115	0.833529	Function unknown	PREDICTED: uncharacterized protein LOC102586176 [Solanum tuberosum]
RHC12H2G1044.2.gene	1.65942	1.23395	1.50574	1.96138	2.37759	2.11961	1.16753	1.44558	1.91778	1.56649	1.38386	1.51425	1.2459	1.69039	1.27968	2.26223	1.90212	1.9849	1.93638	1.81465	2.06804	2.36479	1.7626	1.92484	Function unknown	PREDICTED: poly(ADP-ribose) glycohydrolase 1-like isoform X1 [Solanum tuberosum]
RHC12H2G1041.2.gene	1.50049	2.3068	1.59471	1.17096	1.97289	1.82201	2.15372	1.29022	1.89284	1.38891	1.36541	1.92225	1.88102	1.78148	1.81305	2.10917	1.47358	2.32489	3.51245	1.34558	2.11048	1.32481	2.19021	1.13626	Function unknown	PREDICTED: proline-rich extensin-like protein EPR1 [Solanum tuberosum]
RHC12H2G1040.2.gene	15.3741	15.0663	18.536	24.9254	23.9906	26.3231	18.6159	17.2369	16.2041	18.7906	19.6083	16.809	15.1143	19.993	12.7614	19.6577	21.4636	22.1999	23.9834	19.5496	21.2843	27.1644	24.7867	23.6549	Transcription	PREDICTED: myb family transcription factor APL isoform X1 [Solanum tuberosum]
RHC12H2G1039.2.gene	13.3803	13.3282	12.2561	13.569	12.9473	14.1116	11.4018	9.51972	9.56076	14.8853	12.483	13.2164	8.67474	15.346	8.54617	12.4699	12.4996	12.1876	13.661	14.8825	14.2033	13.2091	11.3577	12.1368	Inorganic ion transport and metabolism	PREDICTED: potassium transporter 4-like [Solanum tuberosum]
RHC12H2G1036.2.gene	1.26268	1.45341	0.625746	0.55816	0.470549	0.294716	0.848716	1.05292	1.08756	0.561399	0.239491	0.617381	0.476539	0.438648	0.564632	0.806645	0.775087	1.12681	0.538449	0.718125	0.219007	0.801497	0.35915	0.54161	Function unknown	PREDICTED: cytochrome b561 and DOMON domain-containing protein At3g25290-like [Solanum tuberosum]
RHC12H2G1034.2.gene	2.24403	1.69911	1.64527	2.77025	2.73762	2.82405	1.40404	1.72371	1.36549	1.98022	2.1126	1.95778	0.760183	1.64186	1.23888	2.2801	2.45065	2.43703	1.46016	1.46968	1.78462	2.48054	3.18976	3.03367	Replication, recombination and repair	PREDICTED: protein HUA ENHANCER 2-like isoform X1 [Solanum tuberosum]
RHC12H2G1027.2.gene	6.88187	6.56951	6.40465	7.43355	8.20213	8.7512	6.56758	9.12107	7.09172	7.62374	6.35747	5.70638	5.80492	9.05481	6.68999	6.52955	7.87809	8.72156	9.62126	9.84988	8.45673	10.1254	10.0367	8.4245	Function unknown	PREDICTED: brefeldin A-inhibited guanine nucleotide-exchange protein 5 [Solanum tuberosum]
RHC12H2G1021.2.gene	5.99727	6.46177	5.38746	5.39686	4.86021	5.12319	4.27046	4.3566	4.16881	4.97318	5.22158	4.96747	4.02513	5.16288	4.62078	3.56827	4.33609	2.93447	4.82076	5.10974	5.77151	4.03874	3.36682	3.84317	Translation, ribosomal structure and biogenesis	PREDICTED: queuine tRNA-ribosyltransferase subunit QTRTD1-like [Solanum tuberosum]
RHC12H2G1020.2.gene	1.77035	2.18235	1.79256	2.05906	1.35825	1.38888	1.07583	1.40397	0.933522	1.80186	1.88693	1.77757	0.965504	1.59813	0.781657	1.87225	0.971735	1.23643	1.74753	1.40211	2.26096	0.972307	2.18582	2.18253	Posttranslational modification, protein turnover, chaperones	PREDICTED: guanosine nucleotide diphosphate dissociation inhibitor 2 [Solanum lycopersicum]
RHC12H2G1018.2.gene	11.8035	11.6603	13.3803	14.7047	14.3287	14.8517	12.1706	12.8734	12.6308	20.3831	21.0874	19.5197	10.7281	22.0116	12.1835	14.5375	12.9751	15.7853	22.679	20.6841	17.8336	14.859	13.8842	15.8566	Posttranslational modification, protein turnover, chaperones	rab GDP dissociation inhibitor alpha-like [Solanum tuberosum]
RHC12H2G1017.2.gene	3.13733	3.2731	2.86671	2.9202	3.70546	3.65481	3.18902	2.86212	2.55786	3.56783	3.05305	2.77417	2.70329	3.28379	2.06947	2.68653	3.58905	3.08292	3.9427	3.73617	3.82891	3.08829	2.53894	3.17541	Function unknown	PREDICTED: ankyrin repeat protein SKIP35-like isoform X2 [Solanum tuberosum]
RHC12H2G1015.2.gene	5.59416	5.75701	5.61933	6.86814	7.06621	6.0071	5.17236	5.10646	4.63983	5.70028	6.52124	6.4281	4.18124	5.7514	4.50388	4.36558	4.48707	5.54266	6.44171	6.28619	6.07967	5.28944	4.37739	4.54376	Function unknown	PREDICTED: uncharacterized protein LOC102585574 [Solanum tuberosum]
RHC12H2G1009.2.gene	13.1083	10.4719	10.4538	20.6791	30.3302	24.9713	4.35739	4.81126	4.83246	7.8072	6.46058	7.69187	3.15101	8.63596	6.50868	7.00914	5.81824	7.87686	6.46928	7.88303	7.16233	25.2214	13.8953	34.1466	Function unknown	PREDICTED: acetylajmalan esterase-like [Solanum tuberosum]
RHC12H2G1008.2.gene	8.77059	8.54224	8.30638	6.33736	6.10079	6.28176	6.8918	7.52281	5.74995	5.81983	4.8976	5.87976	5.16924	5.93893	4.66935	6.45644	6.50591	5.93706	6.21165	4.89102	5.08145	6.03435	6.8438	6.29243	Function unknown	PREDICTED: uncharacterized membrane protein At1g16860-like [Solanum tuberosum]
RHC12H2G1007.2.gene	14.1951	13.1394	14.5993	11.4322	10.3796	12.2442	9.08784	10.0821	9.18784	10.801	9.66882	10.1139	7.47128	10.8248	7.89578	9.1696	10.6296	10.0771	12.7613	10.704	11.0262	12.5333	12.1015	11.2011	Function unknown	PREDICTED: uncharacterized membrane protein At1g16860-like [Solanum tuberosum]
RHC12H2G1006.2.gene	0.282704	0.20314	0.181849	0.086807	0.03732	0.158992	0.221141	0.169771	0.284512	0.244361	0.286473	0.184206	0.172212	0.196603	0.216131	0.168486	0.148359	0.197209	0.216049	0.183098	0.225426	0.15101	0.108211	0.163356	Intracellular trafficking, secretion, and vesicular transport	PREDICTED: putative clathrin assembly protein At5g57200 [Solanum pennellii]
RHC12H2G1005.2.gene	20.0068	16.9271	14.9264	6.88972	7.91323	7.47212	9.46062	9.75721	7.87337	12.3857	10.7286	10.3399	9.36241	12.5204	8.20839	6.32096	6.29521	7.30424	10.0012	11.5776	12.6148	6.93883	5.68494	6.66324	Function unknown	PREDICTED: ABC transporter D family member 2, chloroplastic [Solanum tuberosum]
RHC12H2G1004.2.gene	12.7345	13.6744	5.61869	3.90522	10.7258	12.7549	8.07194	8.96812	8.01538	11.9631	6.79352	8.84663	10.6709	6.27799	9.41841	8.90007	7.92468	15.9958	12.122	12.0683	6.39652	6.79924	8.10675	2.80663	Function unknown	PREDICTED: zinc finger CCCH domain-containing protein 37-like [Solanum tuberosum]
RHC12H2G0995.2.gene	2.47682	3.23945	2.20895	1.03866	2.41943	1.45514	3.41954	3.51248	2.31393	2.24481	4.48158	2.88053	1.44013	1.82672	1.50225	2.21307	3.16077	2.88689	4.88984	4.06033	4.95301	1.77758	3.12124	2.37891	Function unknown	PREDICTED: pirin-like protein At1g50590 [Solanum tuberosum]
RHC12H2G0994.2.gene	8.29162	7.58666	6.63503	3.44644	2.96866	4.25026	6.42767	8.02921	5.42115	4.71662	6.56207	6.94139	2.49271	6.95039	2.51948	3.81556	5.10684	5.58343	9.18253	11.2973	11.3969	3.76438	3.65225	3.82541	Function unknown	PREDICTED: pirin-like protein At1g50590 [Solanum tuberosum]
RHC12H2G0992.2.gene	1.37061	1.98908	1.70172	4.1797	4.60079	4.08216	1.81629	1.44553	1.40957	2.16569	2.16103	2.69467	1.07447	2.24618	0.936555	2.60124	2.36926	2.29078	2.33876	2.48335	1.99406	3.31907	2.93024	3.39864	Energy production and conversion	PREDICTED: glycerophosphodiester phosphodiesterase GDPDL3-like [Solanum tuberosum]
RHC12H2G0991.2.gene	2.25382	1.44118	0.719369	0.967955	1.18915	0.96779	0.659008	0.683238	0.228859	0.158082	0.016355	0.271232	0.572574	0.370214	0.792179	0.396701	0.360877	0.79306	0.246141	0.379172	0.27666	2.52697	0.750407	0.911388	Cell cycle control, cell division, chromosome partitioning	PREDICTED: cell division protein FtsZ homolog 1, chloroplastic-like [Solanum tuberosum]
RHC12H2G0990.2.gene	3.91311	3.19594	3.66146	4.11627	4.42159	4.22041	2.86595	3.8942	2.95476	4.48752	4.32245	4.62593	3.29374	4.24143	3.0694	4.56348	3.99485	3.7722	5.16042	3.79019	4.41729	4.5543	4.80396	4.54149	Intracellular trafficking, secretion, and vesicular transport	PREDICTED: syntaxin-52-like [Solanum tuberosum]
RHC12H2G0989.2.gene	5.90208	6.28505	6.6598	13.8857	15.137	15.8922	11.1926	11.7081	10.5406	14.8575	13.4214	14.241	6.9991	13.8337	7.59762	13.7481	15.0922	15.2873	13.2015	12.6095	11.5713	15.5425	15.0753	15.2126	Function unknown	PREDICTED: uncharacterized protein LOC102590974 isoform X1 [Solanum tuberosum]
RHC12H2G0988.2.gene	17.9655	16.9093	17.075	8.72572	8.16333	8.05473	7.52545	6.27695	7.38482	8.70919	8.04248	9.10884	6.51699	10.1073	6.53447	5.32559	5.46043	4.68642	9.23206	10.4909	11.0392	4.43993	5.10459	4.31748	Coenzyme transport and metabolism	PREDICTED: L-aspartate oxidase, chloroplastic [Solanum tuberosum]
RHC12H2G0987.2.gene	3.63094	4.06974	3.73109	0.875637	1.01324	2.26652	2.02016	2.46133	1.82255	1.3987	1.78036	1.445	1.33271	1.46413	1.04505	1.23591	1.58268	1.80147	1.75114	1.83478	1.58044	1.10564	0.822191	1.22926	Function unknown	PREDICTED: indole-3-acetate O-methyltransferase 1-like [Solanum tuberosum]
RHC12H2G0985.2.gene	11.6022	9.96152	11.5055	18.1644	17.1785	17.5764	9.54467	9.80833	9.46051	10.6937	12.1661	11.7232	7.34252	13.7175	7.64159	15.5819	13.4642	12.6398	13.9572	12.8299	12.7999	14.5507	14.4739	14.1425	Function unknown	PREDICTED: 65-kDa microtubule-associated protein 1-like [Solanum tuberosum]
RHC12H2G0984.2.gene	3.60437	2.28974	3.66357	6.52893	7.37161	6.58307	5.8516	4.54419	5.03606	6.70531	9.13939	4.92862	3.8312	6.45427	2.78545	6.10926	5.43961	6.16395	6.00105	5.02956	3.97992	11.8228	6.30078	6.78662	Function unknown	PREDICTED: uncharacterized protein LOC102589747 [Solanum tuberosum]
RHC12H2G0983.2.gene	6.10467	7.95193	8.72113	20.0433	24.8168	19.7416	14.3033	14.7786	13.2187	23.3046	25.7205	23.7683	9.75681	21.2285	8.49998	21.3825	18.665	18.777	28.414	26.6461	23.222	21.8172	22.9802	21.1239	Posttranslational modification, protein turnover, chaperones	PREDICTED: grpE protein homolog, mitochondrial-like isoform X1 [Solanum tuberosum]
RHC12H2G0982.2.gene	20.136	21.6243	24.4693	24.9022	25.3869	25.1196	17.5745	17.5195	18.2169	18.7436	20.0751	20.8152	17.0794	19.5172	16.9175	20.1533	21.1451	22.2522	20.5938	18.9815	19.8105	24.4862	24.7093	24.8732	Function unknown	PREDICTED: EH domain-containing protein 1-like [Solanum tuberosum]
RHC12H2G0980.2.gene	13.1186	11.7487	10.6574	7.7548	8.58607	6.72215	10.0758	9.78355	9.72332	9.37479	10.5047	9.92107	15.0066	8.78222	13.9281	8.0114	7.61478	7.05724	7.09723	9.02984	9.73254	8.63212	5.91377	7.37189	Function unknown	PREDICTED: uncharacterized protein LOC102588767 [Solanum tuberosum]
RHC12H2G0979.2.gene	6.11799	5.20693	5.92442	23.7037	22.185	22.2032	4.2584	3.89833	3.94064	7.42573	6.88972	5.76074	4.38745	6.70871	3.69348	8.71415	6.57223	7.48979	5.32752	5.75104	5.94287	13.911	16.0031	12.8885	Carbohydrate transport and metabolism	PREDICTED: uncharacterized protein LOC102588212 isoform X2 [Solanum tuberosum]
RHC12H2G0978.2.gene	2.68647	2.38703	2.61502	14.2548	14.3788	12.0549	0.58593	0.4577	0.792427	1.36695	1.07633	0.855724	1.47615	1.67347	0.945417	6.90547	6.53475	5.23939	0.955142	1.68106	1.8035	15.2243	14.5801	14.6053	Cell wall/membrane/envelope biogenesis	PREDICTED: cellulose synthase-like protein G1 [Solanum tuberosum]
RHC12H2G0977.2.gene	5.69186	4.81745	5.97067	1.56052	1.50578	1.78554	2.05031	1.88626	2.38316	1.77032	1.20834	1.16913	3.08259	2.12732	3.00596	1.64335	1.79895	2.49151	2.63128	2.22266	1.95869	2.43472	2.0994	2.89189	Carbohydrate transport and metabolism	glucan endo-1,3-beta-glucosidase 13-like precursor [Solanum tuberosum]
RHC12H2G0976.2.gene	1.04442	1.37915	1.08764	1.84253	1.33109	1.4418	0.535786	0.759844	1.20439	1.63545	1.24416	0.899146	0.792276	1.13158	0.658177	1.94505	0.855107	1.04948	2.20082	2.02404	1.64749	1.35308	0.942189	1.49283	Posttranslational modification, protein turnover, chaperones	PREDICTED: polyubiquitin-like [Solanum pennellii]
RHC12H2G0975.2.gene	5.66427	5.10559	4.36269	9.72717	10.063	9.38587	5.02325	5.57252	6.45204	7.94668	6.60237	7.8907	4.03048	9.34623	4.05277	6.33472	7.6036	7.9911	10.5508	6.97734	8.96126	10.3765	8.71484	7.20441	Transcription	PREDICTED: ribonuclease 3-like protein 2 [Solanum tuberosum]
RHC12H2G0974.2.gene	10.2442	16.1726	6.12301	13.8789	10.2037	11.3291	16.7065	9.46402	3.51091	9.92592	0	11.5219	10.9124	6.45036	7.59133	13.4154	9.44098	12.7206	10.5664	10.3003	9.57999	12.0886	2.95346	17.3812	Function unknown	PREDICTED: cell differentiation protein RCD1 homolog [Solanum tuberosum]
RHC12H2G0971.2.gene	11.3663	11.6826	12.0438	18.4142	16.2082	16.2047	19.6447	17.1173	17.8549	12.3443	11.7641	11.203	2.97492	11.525	2.70604	26.9597	20.0888	22.0168	11.1277	11.0426	14.3818	21.8567	24.7916	19.2718	Posttranslational modification, protein turnover, chaperones	PREDICTED: NEP1-interacting protein-like 1 [Solanum tuberosum]
RHC12H2G0970.2.gene	17.1977	18.2464	18.3976	14.0721	16.9629	17.3142	14.5391	15.5106	13.5895	18.1345	16.7176	17.2524	10.353	17.0414	10.5461	16.3749	17.6409	16.0593	18.6628	16.2665	16.4438	17.7352	16.9527	15.653	Function unknown	PREDICTED: uncharacterized protein LOC102605289 [Solanum tuberosum]
RHC12H2G0966.2.gene	0.333618	0.102297	0.16847	1.4146	1.33639	1.05509	0.069718	0.057945	0.068027	0.66525	0.460086	0.690821	0.096606	0.216838	0.267979	0.248935	0.021502	0.16115	0.262132	0.272019	0.32578	0.833372	0.683762	0.752163	Function unknown	PREDICTED: (E,E)-germacrene B synthase-like [Solanum tuberosum]
RHC12H2G0958.2.gene	1.54929	2.03121	2.1794	0.142855	0.592838	0.150661	0.979322	1.20066	0.507903	0.117038	0.44322	0.281278	0.467381	0	1.10011	0.09031	0.140449	0.159339	1.40122	0	0.38032	0.461554	0.338757	0.671786	Function unknown	hypothetical protein CQW23_07395 [Capsicum baccatum]
RHC12H2G0957.2.gene	3.42182	2.86625	2.30895	2.48582	3.45009	3.73085	1.60611	2.52888	1.64712	3.18665	2.89448	2.82331	0.911253	2.70844	1.54583	2.6337	2.22257	2.85265	2.89577	3.53466	2.57225	2.86841	2.70217	2.10153	Defense mechanisms	PREDICTED: uncharacterized protein LOC102597212 [Solanum tuberosum]
RHC12H2G0956.2.gene	6.57684	5.59404	5.44248	11.4648	10.9917	11.5111	5.21397	5.38486	4.80075	8.43283	8.98781	9.81719	2.72438	7.07333	3.29721	7.54466	7.86767	6.95634	6.30973	7.09912	6.43343	11.9962	11.8714	11.2507	Function unknown	PREDICTED: uncharacterized protein LOC102597542 [Solanum tuberosum]
RHC12H2G0955.2.gene	5.1407	4.42965	3.09233	4.55631	4.35161	4.21971	2.8588	2.73767	2.98517	2.89958	3.01336	3.53582	2.84789	6.59119	2.60728	3.73553	3.36	4.38005	5.75071	3.48003	3.57866	4.82098	4.82545	3.65419	Carbohydrate transport and metabolism	PREDICTED: probable folate-biopterin transporter 4 [Solanum tuberosum]
RHC12H2G0954.2.gene	58.4636	56.6559	59.4678	102.768	88.7965	94.0759	67.9523	73.8557	66.1237	109.145	137.306	121.117	46.1643	92.1065	58.1157	120.139	91.2462	87.919	127.79	117.352	108.521	123.593	134.441	113.178	Function unknown	PREDICTED: uncharacterized protein LOC102598163 [Solanum tuberosum]
RHC12H2G0952.2.gene	0.535163	0.560747	0.464008	0.661073	0.746587	0.790932	0.205541	0.482119	0.296677	0.869873	0.529962	0.578873	0.14459	0.715974	0.042959	0.621521	0.528969	0.662744	0.843155	0.782932	0.734903	0.480676	0.335091	0.460873	Function unknown	PREDICTED: UDP-glycosyltransferase 89B1-like [Solanum tuberosum]
RHC12H2G0951.2.gene	1.10084	0.885966	0.189075	0.947226	0.316256	0.815042	0.270146	0.0762	0.725808	0.181322	0.694319	0.368393	0.345845	0.192585	0.221815	1.53098	0.639341	1.24282	0.369235	0.608664	0.907057	1.44434	0.589205	0.90155	Function unknown	PREDICTED: uncharacterized protein LOC102599052 [Solanum tuberosum]
RHC12H2G0948.2.gene	20.4783	22.4838	21.6238	39.6658	34.9866	36.6467	27.0387	27.1049	24.0444	26.7009	25.0576	26.7955	23.0833	23.8993	21.1724	31.5451	31.0134	29.6777	23.0244	22.1005	20.7688	35.1266	36.18	33.6251	Cell wall/membrane/envelope biogenesis	chloroplast lipocalin [Solanum tuberosum]
RHC12H2G0947.2.gene	3.23529	3.83986	3.25777	4.98379	3.37676	4.82677	3.27171	3.85339	3.22905	4.52637	3.33933	3.07525	3.13436	3.76194	3.15999	3.28107	3.18031	3.8153	3.17831	2.87705	3.60792	4.58526	3.98543	4.37404	Signal transduction mechanisms	PREDICTED: probable protein phosphatase 2C 55 [Solanum pennellii]
RHC12H2G0946.2.gene	6.92301	8.67492	9.75909	9.91731	8.9388	8.61617	5.96	6.79052	10.5006	8.31175	7.61506	6.94813	5.36385	9.73752	4.77404	8.02761	7.72698	8.47829	8.68506	7.62085	9.36564	9.04617	7.84635	9.82691	Energy production and conversion	PREDICTED: electron transfer flavoprotein subunit alpha, mitochondrial [Solanum lycopersicum]
RHC12H2G0943.2.gene	15.4913	16.6069	15.1982	15.5446	13.2559	12.899	10.8008	9.3968	10.0539	15.0905	13.9203	14.6644	11.2037	15.8766	12.3002	9.80125	8.32711	6.98183	15.6922	13.872	18.1763	9.84926	9.34761	9.57509	Function unknown	PREDICTED: TBC1 domain family member 15-like [Solanum tuberosum]
RHC12H2G0942.2.gene	7.50103	5.45428	8.27697	4.7136	3.33911	4.45491	5.1245	5.24498	4.09635	6.23118	7.81503	6.92909	4.8429	6.26455	7.12017	7.48641	4.34589	6.43028	8.2739	8.97199	6.78469	7.87427	5.96394	5.76594	Translation, ribosomal structure and biogenesis	PREDICTED: protein translation factor SUI1 homolog 2-like [Solanum tuberosum]
RHC12H2G0941.2.gene	5.3421	4.81327	4.59009	4.91878	4.67391	4.56321	4.51931	3.67955	3.49232	4.74952	5.60816	5.07937	1.93046	5.07246	2.13259	4.30546	5.16519	4.2112	4.82059	5.05649	6.14219	5.14324	5.14123	5.12958	Function unknown	PREDICTED: autophagy-related protein 18f-like isoform X1 [Solanum tuberosum]
RHC12H2G0939.2.gene	16.5498	19.6628	16.0639	18.5433	22.5871	19.2012	15.4113	13.7923	16.9357	16.1878	14.5129	16.9394	11.7697	21.9905	10.7796	13.6019	12.1939	12.681	17.2644	19.6381	20.7076	13.3903	13.2875	11.1623	Function unknown	PREDICTED: uncharacterized protein LOC102586900 [Solanum tuberosum]
RHC12H2G0938.2.gene	3.65495	3.91976	3.301	3.28108	3.61281	2.89869	1.82926	2.42794	2.19569	2.36517	1.78105	1.58628	2.51044	1.84888	2.67273	3.97403	4.5011	5.74932	2.66513	2.57497	2.09703	4.22259	4.08374	3.73358	Cytoskeleton	PREDICTED: kinesin-3-like [Solanum tuberosum]
RHC12H2G0936.2.gene	65.2845	60.1486	72.0695	47.3748	52.1513	50.4924	91.7077	76.2304	86.2518	42.7821	51.9027	46.2908	42.9681	50.8577	43.0503	53.562	47.7205	50.9124	49.7524	49.7649	55.9977	47.6925	44.5217	42.0037	Chromatin structure and dynamics	PREDICTED: histone H2A.6-like [Solanum tuberosum]
RHC12H2G0933.2.gene	3.53635	2.53525	3.21933	8.8437	10.6077	8.85196	4.0169	4.79785	1.93064	6.64569	6.08676	4.68689	2.89825	5.42016	3.44626	6.19647	6.26888	5.43504	5.05806	4.71614	4.8893	8.30693	7.68633	7.70241	Function unknown	PREDICTED: tRNA (guanine(37)-N1)-methyltransferase 1 [Solanum tuberosum]
RHC12H2G0932.2.gene	3.86814	2.86564	2.68314	2.79879	3.26938	3.0983	2.66455	4.21284	2.63248	2.89375	2.39832	4.09884	2.17736	2.80414	2.49463	3.07239	2.3494	3.24777	3.6278	3.24446	3.20111	3.26034	2.63842	2.61005	Signal transduction mechanisms	PREDICTED: G-type lectin S-receptor-like serine/threonine-protein kinase At4g27290 isoform X1 [Solanum tuberosum]
RHC12H2G0930.2.gene	13.246	13.2081	13.7011	9.20893	8.0184	7.9471	11.1821	10.5852	11.1288	4.76843	5.06838	6.13067	8.38721	5.04306	9.15495	6.33298	8.89712	7.27675	8.55748	4.16766	4.45909	8.10896	8.37989	8.69623	--	PREDICTED: chlorophyllase-2, chloroplastic-like [Solanum tuberosum]
RHC12H2G0928.2.gene	3.59634	2.34844	3.69396	3.60804	3.43476	2.67067	21.2114	22.7934	18.7724	5.61795	5.53034	4.58086	3.6948	6.04013	2.91289	5.5899	10.685	6.88029	10.4491	4.69008	5.53545	3.5339	2.91895	3.67276	Function unknown	PREDICTED: indole-3-acetic acid-amido synthetase GH3.6 [Solanum tuberosum]
RHC12H2G0926.2.gene	137.986	142.845	152.627	116.083	117.123	117.949	105.579	106.291	109.929	109.189	120.116	104.122	122.938	130.167	102.418	93.0505	94.7325	97.9753	125.42	142.217	127.727	94.5015	102.505	100.121	Translation, ribosomal structure and biogenesis	PREDICTED: 60S ribosomal protein L8-like [Solanum tuberosum]
RHC12H2G0925.2.gene	13.0121	6.88723	15.2583	10.3139	5.96707	3.61547	3.5656	3.73631	3.24979	4.3181	4.4647	3.02102	6.4027	6.54786	5.08707	3.85131	3.33661	5.27163	4.71771	6.37814	5.27556	4.93006	7.41957	4.80768	Function unknown	PREDICTED: glycine-rich RNA-binding protein 3, mitochondrial-like [Solanum tuberosum]
RHC12H2G0924.2.gene	8.53099	8.24372	8.00467	8.48399	8.89895	8.61818	10.6015	10.7113	10.5265	12.9648	13.2522	14.1744	12.7904	10.4156	13.3991	8.91818	10.2678	8.99075	11.8392	11.0458	12.3949	8.04673	7.04818	8.42925	Transcription	PREDICTED: scarecrow-like protein 21 [Solanum tuberosum]
RHC12H2G0918.2.gene	36.555	26.2641	37.3903	38.2306	27.5091	34.5102	26.8633	32.3336	33.2159	39.2096	39.5573	27.3312	20.5776	41.2922	18.6585	27.8961	23.4968	34.6439	42.1849	38.2877	29.5375	22.9551	40.5538	24.4488	Intracellular trafficking, secretion, and vesicular transport	PREDICTED: vesicle-associated protein 4-1-like [Solanum tuberosum]
RHC12H2G0915.2.gene	1.1626	0.396249	2.66461	0.112384	0.053794	0.234407	0.494145	0.22684	1.01229	0.617801	0.098177	1.58019	0.573803	0.263957	0.420008	0.202423	0.250367	0.994179	1.4029	0.337682	1.09374	2.06632	1.68422	0.097164	--	PREDICTED: acetyl-CoA-benzylalcohol acetyltransferase-like [Solanum tuberosum]
RHC12H2G0914.2.gene	3.47626	3.74482	2.72219	10.0191	10.7395	10.3839	2.89257	4.26537	3.24233	4.62114	9.66665	5.23543	1.09606	6.95054	1.30003	4.03184	3.26148	3.4023	4.95108	6.36697	5.50576	4.65729	4.40134	4.5711	--	PREDICTED: acetyl-CoA-benzylalcohol acetyltransferase-like [Solanum tuberosum]
RHC12H2G0910.2.gene	19.3788	21.564	21.464	19.2088	20.2889	22.5851	16.0409	16.5909	15.2494	15.2313	12.8026	13.6804	14.5595	15.511	12.3366	16.6094	19.4276	15.4579	13.0479	15.8134	15.8285	22.9672	19.6101	24.3961	Function unknown	PREDICTED: probable sodium/metabolite cotransporter BASS1, chloroplastic [Solanum tuberosum]
RHC12H2G0909.2.gene	6.74632	6.45081	6.57097	12.9431	14.3294	15.2217	6.8919	7.37126	7.89834	6.35777	5.27079	6.89011	4.84639	9.95436	5.57341	14.6855	12.0279	11.2216	8.50461	7.78389	9.51316	16.326	14.327	14.3095	Intracellular trafficking, secretion, and vesicular transport	PREDICTED: cyclic nucleotide-gated ion channel 4-like [Solanum tuberosum]
RHC12H2G0908.2.gene	11.6141	13.6855	17.5754	11.346	13.3696	6.07338	18.4489	12.6115	17.0814	14.0461	15.5544	21.7167	8.62215	12.5942	10.251	17.5127	13.1805	12.0886	15.0571	19.4188	16.0825	12.2871	6.17647	11.9111	Intracellular trafficking, secretion, and vesicular transport	PREDICTED: vesicle-associated protein 4-1-like [Solanum tuberosum]
RHC12H2G0907.2.gene	0.295258	0.111406	0.377928	0.339527	0	0	0	0	0	0.202054	0.272734	0	0	0.125316	0.248059	0.095825	0	0.265772	0.102423	0.13111	0	0.119389	0.357066	0	--	--
RHC12H2G0906.2.gene	0.363947	0.375031	0.488878	0.836705	0.956159	0.845084	0.551813	0.287308	0.632059	0.620291	0.750576	0.54829	0.120099	0.725848	0.167401	0.302122	0.38593	0.367204	0.460223	0.868193	0.624334	0.357889	0.645707	0.669256	--	PREDICTED: acetyl-CoA-benzylalcohol acetyltransferase-like [Solanum tuberosum]
RHC12H2G0905.2.gene	0.518499	0.436789	0	0.867026	0.359167	0.669527	0	0	0.582345	0.655808	0.609832	0.729224	0	0.367611	0	0	0.453296	0.777991	0.720858	0.362716	0.677424	0	0.235863	0.477055	--	hypothetical protein BC332_32290 [Capsicum chinense]
RHC12H2G0904.2.gene	1.14537	1.49411	1.63902	0.93288	0.677336	0.525229	2.91751	2.34675	2.73745	1.86895	2.43977	2.74513	0.882349	3.01917	0.583369	6.52986	6.40434	6.88824	2.13657	3.46617	3.62698	2.52218	2.17589	2.25879	--	PREDICTED: acetyl-CoA-benzylalcohol acetyltransferase-like [Solanum tuberosum]
RHC12H2G0903.2.gene	2.84747	2.34629	2.48827	0.450624	0.669353	0.358533	2.15817	2.27349	1.17945	1.49516	0.881712	0.828532	0.822136	1.42097	0.671043	2.50796	1.89959	1.38265	0.891466	1.20602	1.19053	0.833955	1.29303	1.18922	--	orf101 (mitochondrion) [Solanum commersonii]
RHC12H2G0897.2.gene	0.338243	0.087138	0	0	0.058262	0	0.143203	0.083697	0.045913	0.081361	0.047672	0.049902	0	0	0	0	0	0.038561	0	0.045687	0	0.046843	0.177626	0.03927	Signal transduction mechanisms	PREDICTED: probable receptor-like protein kinase At1g33260 [Solanum tuberosum]
RHC12H2G0896.2.gene	4.73972	4.21197	4.43461	6.99466	6.08402	7.1983	3.07522	3.12154	2.76246	4.47262	3.67323	4.15785	1.87936	5.17154	2.21094	7.2161	6.03437	6.42218	5.63684	4.47773	3.84585	9.12384	10.5811	8.90704	Signal transduction mechanisms	PREDICTED: probable LRR receptor-like serine/threonine-protein kinase At1g53430 [Solanum tuberosum]
RHC12H2G0893.2.gene	10.8221	11.0296	11.6966	14.2666	14.3677	15.3428	9.80434	10.6381	9.32695	7.81323	13.0957	11.5015	6.52908	11.9502	7.32709	12.0742	8.51727	10.3544	12.7605	7.54605	14.0233	6.01853	10.3015	12.9669	Posttranslational modification, protein turnover, chaperones	PREDICTED: transmembrane E3 ubiquitin-protein ligase 1-like [Solanum tuberosum]
RHC12H2G0892.2.gene	3.35653	3.34457	3.60374	2.38613	2.7512	2.94624	0.732911	1.03843	0.865971	1.60596	1.24473	1.59894	1.07653	1.65009	1.25363	3.56853	3.41604	2.53477	1.77866	1.37109	2.41052	2.68968	2.93288	3.45836	Function unknown	PREDICTED: protein TPX2-like [Solanum tuberosum]
RHC12H2G0891.2.gene	4.31075	3.99459	4.09133	5.80633	5.0107	4.55219	4.41281	3.76859	3.35031	6.45203	8.73458	6.01022	5.30492	5.46204	5.85698	3.37961	3.51079	3.97489	6.11227	4.52822	4.7074	4.12204	4.90566	4.07242	Transcription	PREDICTED: ethylene-responsive transcription factor 4-like [Solanum tuberosum]
RHC12H2G0887.2.gene	1.09581	1.03549	1.04198	0.785717	0.971061	1.21858	0.117704	1.1802	1.2122	1.1563	0.134301	1.35742	0.951111	1.56505	1.09337	0.655878	0.671559	0.895661	1.40485	1.88099	1.89218	0.801227	1.11383	0.596754	Function unknown	PREDICTED: disease resistance protein At4g27190-like isoform X2 [Solanum tuberosum]
RHC12H2G0886.2.gene	0.753513	0.771444	0.567554	0.555329	0.504275	0.429904	0.939148	0.846912	0.693255	0.963812	0.948877	0.374938	0.85763	1.38183	0.7516	0.641353	0.117937	0	1.00381	1.1484	1.2491	0.484258	0.31055	0.645334	Function unknown	PREDICTED: disease resistance protein At4g27190-like isoform X2 [Solanum tuberosum]
RHC12H2G0884.2.gene	39.0987	61.7417	78.5722	67.1262	26.6987	30.3991	59.5415	29.9158	47.7017	21.3449	47.7951	21.0432	32.1884	29.9374	53.756	55.5289	44.0196	28.7786	27.1414	39.9216	22.3686	37.2873	37.7507	59.5248	Function unknown	PREDICTED: uncharacterized protein LOC102583419 [Solanum tuberosum]
RHC12H2G0882.2.gene	2.99759	3.14172	4.01661	6.25756	5.63874	7.25579	2.18806	2.52832	2.11116	4.14689	4.70037	3.68654	1.8176	4.29348	1.72108	4.02552	4.40936	4.46052	4.29758	4.00975	4.48825	6.87981	6.36262	6.1478	Function unknown	PREDICTED: protein LAZ1-like isoform X1 [Solanum tuberosum]
RHC12H2G0874.2.gene	704.642	725.814	695.571	478.831	422.417	467.484	762.576	730.812	805.594	413.658	401.193	381.859	684.515	391.793	667.685	715.639	715.038	712.095	326.893	392.484	380.651	402.866	411.493	436.709	Energy production and conversion	cytochrome b6-f complex iron-sulfur subunit, chloroplastic [Solanum tuberosum]
RHC12H2G0871.2.gene	8.45088	8.77383	9.00758	1.43973	0.499079	0.974023	4.31143	3.56417	3.9113	4.13103	3.75888	4.34818	2.13259	5.08111	1.88506	9.72854	7.74131	7.696	3.49965	4.83878	5.89809	6.57739	6.01918	7.7351	Function unknown	PREDICTED: B-box zinc finger protein 21-like [Solanum tuberosum]
RHC12H2G0868.2.gene	2.44886	1.89011	2.78629	1.01237	0.750343	1.30742	1.97504	1.93392	1.11144	1.42835	1.78315	1.59214	1.29188	2.01484	2.36184	0.697826	0.932119	0.961847	2.55206	2.00141	1.46443	0.637814	1.16994	0.438061	Function unknown	PREDICTED: uncharacterized protein LOC104644893 [Solanum lycopersicum]
RHC12H2G0867.2.gene	1.98436	1.16155	2.4285	1.29215	2.09767	2.10006	0.899761	1.02531	0.948008	1.26605	2.30746	1.21295	1.28326	1.38483	1.29563	0.857635	1.03246	1.19444	2.32028	1.88707	1.15576	1.27325	1.31658	1.20254	--	PREDICTED: uncharacterized protein LOC107006769 [Solanum pennellii]
RHC12H2G0862.2.gene	0.987472	0.79546	1.56397	0.404757	0.881549	0.431398	0.474185	0.317211	0.341269	0.372741	0.63801	0.537676	0.122894	0.396428	0.2837	0.426431	0.417074	0.369176	0.472587	0.654031	0.493778	0.66631	0.508106	0.534862	Function unknown	PREDICTED: uncharacterized protein LOC102586291 [Solanum tuberosum]
RHC12H2G0859.2.gene	23.3862	20.2873	22.5086	12.2079	12.4188	14.6364	36.6719	37.5083	37.2096	18.4281	20.3778	17.4238	66.3758	19.4182	66.3058	16.8524	15.2044	14.7073	22.5297	21.4419	23.9663	12.5125	11.7791	10.4968	Function unknown	PREDICTED: peroxisome biogenesis protein 22 isoform X1 [Solanum tuberosum]
RHC12H2G0858.2.gene	8.89207	8.71423	7.82843	10.7467	14.9207	13.9165	9.49827	9.10165	7.8006	14.17	13.4859	12.8743	6.40301	13.0889	6.27043	12.5993	11.3753	11.7498	13.2613	12.7352	14.8608	11.5335	12.2248	11.4391	Function unknown	PREDICTED: zinc finger CCCH domain-containing protein 13 isoform X1 [Solanum tuberosum]
RHC12H2G0857.2.gene	21.1313	19.2445	22.1351	18.7178	17.6834	19.2548	19.5895	17.2602	17.0379	29.3673	31.0685	22.2881	15.0528	26.5156	15.5171	23.3274	26.8854	24.1896	23.5559	24.6849	21.0252	24.3275	25.7843	24.9571	Function unknown	PREDICTED: traB domain-containing protein [Solanum tuberosum]
RHC12H2G0851.2.gene	1.68208	1.5306	1.66585	0.498877	0.640394	0.494695	1.62549	1.41315	1.23554	1.5187	1.41923	1.01549	0.580864	2.36956	0.66876	0.919786	0.554864	1.09118	3.88969	1.85842	1.80275	0.684095	1.01964	0.573971	Function unknown	PREDICTED: uncharacterized protein LOC102587935 [Solanum tuberosum]
RHC12H2G0849.2.gene	1.96412	2.40449	2.19117	2.05712	3.02327	2.03006	0.775909	0.903254	1.07876	0.704719	1.8807	1.25284	0.054604	1.15606	0.463918	1.91684	1.73937	1.83021	1.00845	0.96547	1.24462	2.29288	2.58413	2.77833	Function unknown	PREDICTED: septum-promoting GTP-binding protein 1-like [Solanum tuberosum]
RHC12H2G0848.2.gene	23.6805	20.6616	22.6436	22.9857	22.5028	21.2216	17.6663	17.7693	17.6309	22.3503	23.5812	22.7099	14.5412	27.233	15.7004	22.2489	20.388	23.054	27.0383	26.5766	27.6925	21.0718	22.2229	22.7952	Defense mechanisms	PREDICTED: protein DETOXIFICATION 40 [Solanum tuberosum]
RHC12H2G0847.2.gene	30.4937	30.4916	28.1174	24.2356	26.4754	26.739	19.9181	21.2199	19.795	24.8174	23.1011	22.7951	16.855	34.407	22.6558	23.8809	27.2485	27.5599	34.9341	30.3054	32.4335	36.9356	31.8583	33.805	Energy production and conversion	PREDICTED: aconitate hydratase, cytoplasmic [Solanum tuberosum]
RHC12H2G0846.2.gene	21.0376	20.0501	22.7175	22.0613	20.1257	21.2647	14.6082	15.8259	11.4561	27.4799	27.5579	25.3922	14.2566	23.2834	13.8782	18.2484	18.5245	17.9505	23.1886	22.3441	26.1602	24.6966	22.3366	23.7379	Coenzyme transport and metabolism	PREDICTED: NEDD8-activating enzyme E1 regulatory subunit-like isoform X1 [Solanum tuberosum]
RHC12H2G0844.2.gene	1.02094	1.08395	0.810896	0.726074	0.587946	0.741587	0.6018	0.760311	0.333353	0.215862	0.21025	0.212323	0.893184	0.368876	0.644049	0.822226	0.682906	0.444722	0.297117	0.322547	0.314351	0.278348	0.171998	0.361447	Function unknown	PREDICTED: recQ-mediated genome instability protein 1 [Solanum tuberosum]
RHC12H2G0843.2.gene	7.22409	8.86431	7.9026	7.10489	7.07063	8.36425	6.41836	6.14971	5.64004	5.41277	6.34026	5.29141	6.28864	6.99449	6.57318	7.89597	9.11697	8.72004	7.1523	5.42306	7.56846	9.66533	9.63867	10.1903	Function unknown	PREDICTED: B-cell receptor-associated protein 31-like [Solanum tuberosum]
RHC12H2G0841.2.gene	2.60772	1.96831	2.83832	10.2432	11.3523	10.4285	4.78421	2.94216	2.61409	1.81691	3.77263	2.80548	2.17747	3.64705	2.51225	6.99843	8.33334	10.4551	4.04511	3.97402	3.89767	15.6655	15.0803	17.5119	Function unknown	PREDICTED: growth hormone-regulated TBC protein 1 [Solanum lycopersicum]
RHC12H2G0839.2.gene	1.36963	0.767604	1.23025	6.82524	6.99684	7.39946	0.933094	1.77047	1.25459	2.67287	2.85502	2.61884	0.734852	2.11152	0.975228	2.06581	3.1732	1.98654	2.38496	2.61204	3.05154	10.2785	8.87502	10.7136	Function unknown	PREDICTED: 1-aminocyclopropane-1-carboxylate oxidase 2 [Solanum tuberosum]
RHC12H2G0838.2.gene	12.9409	13.8977	13.104	5.86996	6.26371	5.78856	9.05927	8.58221	8.03638	11.8778	12.9103	11.3955	7.02266	12.2909	5.12118	8.3281	7.69086	7.27193	11.7451	12.4034	12.8128	6.33223	6.09296	6.28772	Posttranslational modification, protein turnover, chaperones	PREDICTED: E3 ubiquitin-protein ligase COP1-like isoform X1 [Solanum tuberosum]
RHC12H2G0836.2.gene	11.1731	11.6335	10.8094	11.3616	10.416	12.1452	11.0516	10.4645	13.0487	16.3531	13.0429	11.4323	6.99441	14.9083	7.0315	12.6818	16.2266	18.3305	13.991	9.43859	13.8096	13.5966	9.18989	12.1525	Transcription	ethylene-responsive transcription factor 7-like [Solanum tuberosum]
RHC12H2G0835.2.gene	0.766259	0.501302	0.746046	0.856001	1.25621	0.577623	0.515176	0.482675	0.6237	1.19032	0.887054	0.915479	0.355769	0.929332	0.247602	0.835081	0.948823	0.813212	0.903515	0.748744	1.23536	1.14426	1.3949	1.6839	Function unknown	PREDICTED: putative late blight resistance protein homolog R1B-16 [Solanum tuberosum]
RHC12H2G0833.2.gene	14.5547	12.9746	14.2825	13.0024	17.2806	13.1725	17.177	18.129	16.8443	22.2509	17.6174	22.4224	35.8669	20.9702	44.2528	14.6722	17.816	18.8237	23.9397	18.7222	19.4415	16.4562	14.8443	11.8723	Function unknown	PREDICTED: uncharacterized protein LOC102582411 [Solanum tuberosum]
RHC12H2G0832.2.gene	5.48984	5.59303	4.96215	11.4061	10.8399	9.85099	5.13772	4.42387	4.61226	5.56656	6.46976	6.21965	5.56609	5.62044	6.35532	8.66954	9.73515	9.47368	6.72347	7.53301	5.49931	14.3967	15.5283	13.7204	Signal transduction mechanisms	PREDICTED: protein-tyrosine-phosphatase IBR5-like [Solanum tuberosum]
RHC12H2G0831.2.gene	1.77437	2.38782	1.72923	0.615183	0.744135	0.737987	1.10012	1.10389	1.12037	1.19619	1.2098	1.18513	1.00075	0.855457	0.727507	0.652137	1.24863	1.20499	1.3328	1.1811	0.995524	0.373155	0.487216	0.677475	Intracellular trafficking, secretion, and vesicular transport	PREDICTED: clathrin coat assembly protein AP180-like [Solanum tuberosum]
RHC12H2G0830.2.gene	42.2543	36.3684	49.4222	38.0463	31.8119	33.9714	32.4603	28.975	30.9259	28.8935	38.9737	30.1288	34.3902	27.3859	31.9973	37.6231	31.5747	35.6397	29.7655	31.9726	30.9851	38.5978	36.2317	37.6107	Posttranslational modification, protein turnover, chaperones	PREDICTED: small ubiquitin-related modifier 1 [Solanum lycopersicum]
RHC12H2G0829.2.gene	0.493312	0.370995	0.311676	0	0	0.091385	0.272141	0.271759	0.110795	0.144747	0	0.371487	0	0.194226	0.072589	0.063018	0.152622	0.298658	0.210937	0.171763	0	0	0	0	Function unknown	PREDICTED: putative late blight resistance protein homolog R1A-3 [Nicotiana attenuata]
RHC12H2G0828.2.gene	5.45147	5.09954	6.16413	5.68036	6.15385	5.77521	3.46237	3.45176	2.80453	3.60252	3.22017	3.66827	3.6154	4.58733	2.83336	3.9003	3.19379	3.04684	4.48428	3.83101	4.22368	3.88292	4.33946	3.38729	Translation, ribosomal structure and biogenesis	PREDICTED: methyltransferase-like protein 5 [Solanum tuberosum]
RHC12H2G0826.2.gene	3.97296	4.00824	4.04559	5.65266	5.6399	5.08752	3.94509	3.73729	3.10853	6.06312	5.41515	5.43733	2.80278	5.15996	2.85723	4.72681	3.98418	4.30068	4.47987	4.94982	5.2551	5.49658	5.79957	5.13727	Function unknown	PREDICTED: putative late blight resistance protein homolog R1B-16 [Solanum tuberosum]
RHC12H2G0825.2.gene	2.92511	1.90298	2.75523	2.18715	3.1292	2.61969	1.88066	2.60245	2.73992	3.33226	3.85674	3.35218	1.00089	2.913	1.21181	2.8949	2.97502	2.70586	4.16931	3.3184	4.41468	3.37056	3.80939	3.46086	Function unknown	PREDICTED: putative late blight resistance protein homolog R1B-16 [Solanum tuberosum]
RHC12H2G0824.2.gene	99.0447	93.2368	92.9165	6.04824	5.15972	5.81107	22.2113	23.1259	20.7803	27.5339	25.5708	27.8914	6.41937	46.7519	7.05853	5.10354	5.84719	5.2649	43.3079	45.8488	46.7106	4.08132	3.82656	4.07753	Amino acid transport and metabolism	PREDICTED: protein NRT1/ PTR FAMILY 6.4-like [Solanum tuberosum]
RHC12H2G0823.2.gene	1.91585	1.59497	1.69104	1.85695	1.46994	1.90659	2.83432	3.41737	2.85502	4.37502	3.5724	2.58277	5.77044	2.61727	4.34866	2.93896	3.20888	2.44348	3.31459	3.1886	2.99161	2.01985	2.1381	1.24491	Function unknown	PREDICTED: uncharacterized protein LOC107005355 isoform X1 [Solanum pennellii]
RHC12H2G0817.2.gene	1.73937	6.75454	4.58913	5.10102	4.54486	15.4673	0.026181	0	0.014571	9.52956	5.47921	0.325248	1.21985	5.62945	1.48342	0.121933	3.7525	5.26543	0.484294	3.51872	2.97996	2.4784	0.942663	9.61082	--	--
RHC12H2G0814.2.gene	1.27709	2.14142	2.31927	6.92812	11.0354	8.27188	2.54799	9.43671	8.6539	6.15404	1.23955	12.2529	5.7409	2.04391	2.06345	9.75323	9.58405	10.0105	11.817	2.72572	3.79779	6.3326	4.45167	8.47658	--	--
RHC12H2G0809.2.gene	27.9132	35.8261	24.9776	29.4561	25.4388	24.7521	29.0003	38.1159	38.8682	35.4007	27.1095	30.601	24.4354	28.6225	19.4668	27.0351	21.0259	21.3422	35.5755	26.6181	31.7758	17.6043	22.9241	23.287	Chromatin structure and dynamics	PREDICTED: nuclear transcription factor Y subunit B-3-like [Solanum lycopersicum]
RHC12H2G0806.2.gene	2.96902	2.70632	1.91866	9.58075	9.60543	8.01095	4.81711	5.74378	4.83805	6.95441	6.17485	4.96664	2.96842	5.2695	2.98212	10.5168	11.9409	9.95103	6.22678	4.96648	5.03458	14.2995	13.0946	13.5043	Posttranslational modification, protein turnover, chaperones	PREDICTED: probable E3 ubiquitin-protein ligase XERICO [Solanum tuberosum]
RHC12H2G0805.2.gene	5.57446	5.8688	5.61912	6.64834	7.64878	7.33395	4.90811	5.55101	4.22597	4.60281	4.41434	4.50559	3.03088	5.09945	2.64033	6.74162	6.5063	6.80981	4.27719	5.13619	5.01536	7.27771	6.75199	6.85949	Function unknown	PREDICTED: uncharacterized protein LOC102604420 [Solanum tuberosum]
RHC12H2G0802.2.gene	0.911516	0.798719	1.11926	0.158569	0.09687	0.518147	0.388348	0.758378	0.411856	0.799299	0.564677	0.414468	0.770282	0.733212	1.01714	0.038955	0.135957	0.250561	1.27536	0.706974	0.744501	0.129772	0.032141	0.218541	Cell wall/membrane/envelope biogenesis	hypothetical protein CQW23_06292 [Capsicum baccatum]
RHC12H2G0801.2.gene	10.7084	11.7667	11.6176	15.2156	14.9256	14.6469	9.69277	9.89114	8.96768	13.0835	13.641	13.145	5.0608	16.7277	4.56985	10.0114	10.1195	10.2246	16.3714	15.8105	15.9425	12.4262	13.8696	11.937	Function unknown	PREDICTED: heterogeneous nuclear ribonucleoprotein 1-like [Solanum tuberosum]
RHC12H2G0800.2.gene	1.01295	1.39864	1.84282	0	0.29558	0.273102	0.26081	0.119124	0.101006	0.145094	0.168498	0	0.735599	0.269366	0.414794	0.349917	0.137998	0.287334	0.268169	0.623922	0	0.093806	0.232777	0	Nucleotide transport and metabolism	PREDICTED: thymidine kinase-like [Solanum tuberosum]
RHC12H2G0799.2.gene	6.6889	6.31482	6.45813	5.65387	7.20283	7.50777	7.56513	6.4677	5.50276	7.33481	7.18961	6.22015	6.88779	6.07721	6.87539	6.86449	8.49275	7.89076	9.44801	7.5076	9.87814	7.88717	8.28896	8.02955	Transcription	PREDICTED: WRKY transcription factor 1-like [Solanum tuberosum]
RHC12H2G0798.2.gene	16.2116	13.8922	16.5827	18.1756	15.3728	16.9118	13.7624	16.8456	14.6891	14.0157	17.1408	17.1098	14.6047	15.8816	13.3011	17.8781	13.5337	17.6006	11.7334	17.5521	18.0004	14.7042	15.2872	16.0559	--	PREDICTED: uncharacterized protein LOC102605982 isoform X2 [Solanum tuberosum]
RHC12H2G0796.2.gene	466.295	520.097	460.813	1.72568	2.75303	1.64244	379.254	337.565	412.076	82.7435	76.6579	85.7994	336.714	101.389	298.977	340.436	356.39	361.779	92.6866	106.079	78.8892	80.5452	70.4395	88.0816	Translation, ribosomal structure and biogenesis	PREDICTED: chlorophyll a-b binding protein 5, chloroplastic [Solanum tuberosum]
RHC12H2G0795.2.gene	0.72107	0.486889	0.512253	14.8576	11.4969	12.3126	0.620112	0.759441	0.494231	2.12495	2.83733	1.88985	0.193391	2.68927	0.210261	1.92146	1.76596	1.23303	1.67278	2.07364	2.11583	10.458	10.4443	11.2708	Function unknown	B-box zinc finger protein 8 [Solanum tuberosum]
RHC12H2G0794.2.gene	4.57649	4.19889	3.79114	10.9532	8.35622	8.19734	6.77243	5.1521	6.60239	7.15438	5.77487	6.47313	5.00352	7.0026	4.27923	6.27847	7.20581	6.75996	6.8495	6.83173	7.13618	7.14297	6.90999	8.27088	Intracellular trafficking, secretion, and vesicular transport	PREDICTED: protein transport protein SFT2-like [Solanum tuberosum]
RHC12H2G0793.2.gene	2.24554	2.80644	3.05946	0.966986	1.16248	0.879139	1.11476	1.44777	1.13557	0.868129	1.76083	0.561829	1.26819	1.12973	1.16743	1.17058	1.25103	1.08832	1.38361	0.793387	0.920471	1.25285	1.01451	1.05142	Function unknown	PREDICTED: protein JASON [Solanum tuberosum]
RHC12H2G0791.2.gene	15.6876	13.1864	14.8771	24.1099	22.0187	24.2315	12.7827	10.9199	13.1129	14.8968	16.1739	13.0098	11.8983	13.1877	10.6721	20.4939	19.1818	20.958	11.9172	12.9233	15.4283	29.4659	28.9498	26.0197	Intracellular trafficking, secretion, and vesicular transport	PREDICTED: reticulon-like protein B8 [Solanum tuberosum]
RHC12H2G0788.2.gene	1.46016	1.88121	1.71652	2.72178	2.85528	2.97261	1.87246	2.15498	2.31785	2.69172	2.48282	2.39585	1.05819	2.36097	0.76816	2.26636	2.421	3.35171	2.78672	3.06045	2.46786	1.90841	2.7866	2.98386	Function unknown	PREDICTED: WD repeat-containing protein 26-like [Solanum tuberosum]
RHC12H2G0786.2.gene	8.33159	7.73493	7.38221	10.7213	10.9714	10.8395	7.89916	8.34909	7.97135	6.18869	7.11416	6.35842	6.11424	7.40703	6.04645	9.98864	8.77243	8.24807	8.70457	7.28341	8.73217	10.8601	9.90928	8.41578	Intracellular trafficking, secretion, and vesicular transport	PREDICTED: endoplasmic reticulum-Golgi intermediate compartment protein 3 [Solanum tuberosum]
RHC12H2G0785.2.gene	65.0368	70.3364	63.2492	131.406	158.057	143.2	68.2716	68.0791	72.3577	92.7551	88.5183	94.8672	73.0978	110.233	74.193	93.8846	100.386	105.456	103.318	95.97	105.238	115.574	116.77	116.984	Replication, recombination and repair	PREDICTED: DEAD-box ATP-dependent RNA helicase 53-like isoform X1 [Solanum tuberosum]
RHC12H2G0782.2.gene	17.2505	16.5903	15.5922	9.54457	11.3068	11.0795	13.8896	14.5568	11.9881	13.9845	12.7691	14.0384	10.1182	14.9814	9.59049	10.9799	14.1704	12.3341	16.7389	14.4076	15.7734	10.1495	11.0189	10.6832	Transcription	PREDICTED: auxin response factor 6-like isoform X1 [Solanum tuberosum]
RHC12H2G0780.2.gene	3.50675	2.88126	3.66538	16.1882	16.7886	13.9422	6.97493	7.63314	6.27036	8.27159	9.80579	8.20134	10.7735	9.5803	10.3113	19.3081	16.7399	16.4465	8.70748	9.37509	10.1867	31.2829	32.9179	29.5145	Function unknown	PREDICTED: probable polyamine oxidase 2 [Solanum tuberosum]
RHC12H2G0779.2.gene	2.39643	6.01537	1.97256	1.21025	1.82611	1.1972	1.3816	0.541082	1.56811	0.843964	0.475085	0.682265	0.917776	2.71341	1.56014	0.443669	0.495482	0.920573	2.02607	1.96179	1.64199	0.800879	0.862837	1.45173	Function unknown	PREDICTED: 1-aminocyclopropane-1-carboxylate oxidase homolog [Solanum tuberosum]
RHC12H2G0777.2.gene	2.08664	1.65774	0.906896	8.43114	7.3835	8.1564	3.95232	4.37498	3.39011	9.00222	8.46004	8.17136	1.69166	8.00211	2.80659	5.74124	5.65012	5.2835	7.63004	6.4755	7.7974	6.75294	7.60201	7.96317	--	PREDICTED: serine/threonine-protein phosphatase 7 long form homolog isoform X1 [Solanum tuberosum]
RHC12H2G0776.2.gene	6.07238	6.27824	6.06905	0.680338	3.50826	0.411394	0.265065	0.218171	0.52093	0.432832	0.159408	0.131912	4.85361	0.572577	0.895867	0.274903	0.097714	4.07621	0.857678	0.191746	0.220706	2.39298	0.621181	0.607508	Function unknown	PREDICTED: protein PAT1 homolog 1 [Solanum tuberosum]
RHC12H2G0774.2.gene	11.288	10.6081	12.2966	6.87993	5.72381	5.55717	10.9254	10.3339	8.39385	5.44244	6.64062	6.51327	8.76145	8.66376	8.19504	7.77604	8.62741	5.90625	7.27983	7.32499	7.86715	6.53502	6.67104	8.04359	Amino acid transport and metabolism	PREDICTED: gamma aminobutyrate transaminase 3, chloroplastic [Solanum tuberosum]
RHC12H2G0773.2.gene	3.77303	7.51418	5.1667	34.2162	39.9117	46.4953	3.55555	4.1858	4.20575	6.02243	5.57869	5.18921	4.78785	3.59083	3.00315	24.8696	22.1168	20.6081	3.81161	6.89975	6.83893	40.6184	45.8	47.7539	Secondary metabolites biosynthesis, transport and catabolism	PREDICTED: beta-amyrin 11-oxidase-like [Solanum tuberosum]
RHC12H2G0772.2.gene	30.1027	26.0542	26.6832	137.225	146.68	137.772	25.3304	25.1191	25.7455	29.743	31.8239	30.4679	23.5203	24.1883	19.9426	121.817	112.081	119.454	20.0901	26.0526	22.8015	158.799	159.379	162.387	Amino acid transport and metabolism	PREDICTED: gamma aminobutyrate transaminase 2 [Solanum tuberosum]
RHC12H2G0770.2.gene	3.05686	3.31883	2.697	3.95196	3.81111	4.25443	3.16894	3.78745	3.2198	4.94538	4.5016	4.30981	3.66171	3.81702	3.83521	2.4317	3.10955	3.59996	4.56023	3.85894	4.44146	4.4603	3.64065	3.21881	Intracellular trafficking, secretion, and vesicular transport	PREDICTED: nuclear pore complex protein NUP205 [Solanum tuberosum]
RHC12H2G0769.2.gene	2.41367	3.2509	3.39836	3.3832	3.83567	4.58916	2.12441	2.33414	2.84758	3.4668	3.17507	3.06443	1.40796	2.87793	1.87429	4.11126	3.98048	4.60694	2.45702	3.78867	3.90719	5.17091	4.21457	4.17306	Function unknown	PREDICTED: beta-glucuronosyltransferase GlcAT14B-like [Solanum tuberosum]
RHC12H2G0768.2.gene	11.5832	6.85054	3.84943	2.2338	6.2654	6.94963	2.02984	2.44956	5.15626	1.77023	2.58365	3.07945	3.39119	4.17183	1.46104	2.45918	3.0501	2.23652	2.33326	2.71084	2.97867	2.34354	3.91692	3.26129	Function unknown	PREDICTED: probable sugar phosphate/phosphate translocator At4g32390 [Solanum tuberosum]
RHC12H2G0765.2.gene	0.614598	0.332073	0.571144	7.85496	7.50703	6.14726	0.693974	0.267026	0.450043	1.95985	1.97137	1.21759	0.096943	1.12106	0.058392	2.40262	2.68074	3.04569	0.889133	1.34484	0.607254	8.76956	6.56755	8.71942	Amino acid transport and metabolism	PREDICTED: tyrosine decarboxylase 1-like [Solanum tuberosum]
RHC12H2G0761.2.gene	0.594832	1.0154	0.641506	2.61444	2.37979	2.45346	0.974014	0.640115	0.453827	2.10351	1.95707	0.917471	0.776851	1.78714	0.393842	0.901251	1.83605	1.4023	0.824007	2.27088	0.843186	2.22641	1.04503	2.10743	Function unknown	PREDICTED: kinesin light chain 3 isoform X1 [Solanum tuberosum]
RHC12H2G0759.2.gene	3.53135	2.06373	1.42102	3.0883	3.5951	4.00459	1.44614	1.70557	0.593773	3.61559	2.15147	2.79249	0.427895	1.3198	1.10951	1.76451	1.35986	2.57007	1.80933	3.46225	2.66061	1.51316	4.15149	1.77704	--	PREDICTED: uncharacterized protein DKFZp434B061-like [Solanum tuberosum]
RHC12H2G0756.2.gene	2.07446	1.62299	1.99713	2.50846	2.19719	1.42944	0.515654	0.871524	0.482178	1.59407	2.23575	1.90268	0.477485	1.67334	0.31507	0.818511	1.05523	0.976763	2.45321	1.39716	1.29829	1.81106	1.60702	1.34483	--	PREDICTED: uncharacterized protein LOC102606152 [Solanum tuberosum]
RHC12H2G0755.2.gene	0.813796	0.645401	0.445671	0.696899	0.05329	0.392932	0.254191	0.291765	0.319762	0.361769	0.417652	0.221836	0.370074	0.231695	0.20075	0.428746	0.459	0.504474	0.341193	0.44507	0.319722	0.244156	0.681558	0.410519	Lipid transport and metabolism	PREDICTED: beta-amyrin synthase-like [Solanum tuberosum]
RHC12H2G0754.2.gene	2.51449	2.65745	2.4731	3.63253	3.59353	2.45886	1.19692	1.74871	1.64167	2.49495	2.58073	2.00792	1.45255	2.71844	1.33456	2.1339	1.79254	1.9922	1.67088	2.38897	2.58664	2.98313	3.64586	3.38389	Lipid transport and metabolism	PREDICTED: delta-amyrin synthase [Solanum tuberosum]
RHC12H2G0753.2.gene	3.86173	2.48381	3.00397	6.43298	7.27442	3.49463	2.30827	2.51733	2.39357	9.52733	8.02621	9.26845	1.88607	6.67598	2.34428	5.37823	3.88887	3.97969	7.45264	6.70635	6.11876	7.58103	4.87081	7.2478	Lipid transport and metabolism	PREDICTED: beta-amyrin synthase [Solanum tuberosum]
RHC12H2G0749.2.gene	33.9169	31.5745	27.6547	40.7276	30.0826	33.5141	29.3231	31.6967	34.5166	24.9546	29.9671	29.1925	25.8353	32.6889	28.4088	35.7872	35.6167	32.0953	32.5981	29.9731	28.195	37.7749	37.6496	36.5384	Intracellular trafficking, secretion, and vesicular transport	PREDICTED: signal peptidase complex catalytic subunit SEC11A-like [Solanum tuberosum]
RHC12H2G0748.2.gene	20.8283	23.0502	22.2246	72.4128	68.6335	70.9534	27.0521	26.7338	27.8037	70.371	81.8434	72.3544	24.8035	87.7942	21.1274	36.3928	34.9998	35.136	87.263	81.9889	84.4098	57.4191	63.4101	58.1085	Translation, ribosomal structure and biogenesis	PREDICTED: ribosome biogenesis regulatory protein homolog [Solanum tuberosum]
RHC12H2G0745.2.gene	0.454195	0.463864	0.386814	1.52	1.77198	1.12612	0.631939	0.75451	0.85512	0.657355	0.654839	0.621595	0.465443	1.03226	0.34142	0.972626	0.891515	0.785931	0.913978	0.585086	1.33334	1.47464	1.30227	1.38595	Function unknown	PREDICTED: pentatricopeptide repeat-containing protein At1g08070, chloroplastic [Solanum tuberosum]
RHC12H2G0743.2.gene	0.797608	1.43439	1.24853	1.41415	1.48663	1.65257	0.914256	1.15524	1.46376	0.898282	0.006774	0.985563	0.830053	0.849098	0.654891	0.992581	1.28571	1.50923	1.05505	0.979915	0.90967	1.22944	0.892338	0.869987	Function unknown	PREDICTED: zinc finger CCCH domain-containing protein 32-like [Solanum tuberosum]
RHC12H2G0742.2.gene	4.04855	3.61976	4.13484	4.55776	5.11632	3.90345	6.66364	5.41928	5.00596	6.16897	6.88254	5.82285	3.16642	7.34873	4.65093	7.05066	5.95079	4.99364	8.29175	9.08021	7.19508	6.84418	6.36586	4.69869	--	PREDICTED: uncharacterized protein At1g15400 [Solanum lycopersicum]
RHC12H2G0741.2.gene	1.51347	0.660569	1.31142	1.26716	1.32236	1.11312	3.4378	3.09252	2.4572	1.67911	2.32191	2.23013	1.88714	1.71287	1.42521	3.65178	3.31621	4.64344	1.90421	2.70463	1.78781	2.33665	2.68409	2.51877	Function unknown	PREDICTED: uncharacterized protein LOC102602473 [Solanum tuberosum]
RHC12H2G0739.2.gene	5.71821	5.86054	5.96848	5.43153	5.35584	5.2631	3.81682	4.75267	3.1558	4.91491	5.17358	4.84355	5.13225	5.40647	3.87854	5.63797	4.19679	4.88892	5.01763	5.84152	6.23263	7.064	6.67451	4.88855	Function unknown	PREDICTED: mediator of RNA polymerase II transcription subunit 17 [Solanum tuberosum]
RHC12H2G0738.2.gene	2.31351	2.87106	2.8469	2.71707	2.13182	2.00475	3.04318	3.35743	3.97978	2.64297	3.39118	2.73959	0.808892	3.71115	2.41107	4.5155	2.40407	2.05705	2.71734	2.44837	3.09623	2.89945	2.88061	2.79927	Function unknown	PREDICTED: uncharacterized protein LOC102596632 [Solanum tuberosum]
RHC12H2G0737.2.gene	0.622053	0.460161	0.526471	0.771245	0.803096	0.742121	0.511253	0.423341	0.293756	0.712457	0.669665	0.453409	0.211234	0.536111	0.121392	1.02564	0.58037	1.12229	0.434807	0.640671	0.746414	0.518207	1.1136	0.899979	Function unknown	PREDICTED: uncharacterized protein LOC102597189 [Solanum tuberosum]
RHC12H2G0733.2.gene	2.47787	2.94296	2.59609	4.55514	4.95221	5.49799	2.95378	2.95768	2.51821	3.85561	3.3007	2.96857	1.30716	2.88272	1.56558	4.61586	3.8734	4.35573	2.88588	2.88088	3.05625	5.90864	5.88097	6.16857	Signal transduction mechanisms	PREDICTED: protein kinase PINOID 2 [Solanum tuberosum]
RHC12H2G0732.2.gene	27.2577	27.0921	28.2578	16.4517	16.922	14.7124	18.0569	17.6924	15.8213	17.3449	20.2191	15.9033	15.2435	18.6582	13.6519	17.1332	17.0714	15.5903	16.5434	17.3732	19.2583	18.4544	16.7844	18.609	Function unknown	PREDICTED: uncharacterized protein LOC102598806 [Solanum tuberosum]
RHC12H2G0731.2.gene	3.66445	5.2371	4.6499	6.68941	7.13483	6.88085	2.55569	2.8779	2.76223	5.28064	5.64743	5.16258	2.39439	6.41335	2.10899	4.34772	4.41448	4.40268	4.7432	6.05794	4.59447	5.75005	6.22815	5.6615	Function unknown	PREDICTED: tudor domain-containing protein 3 [Solanum tuberosum]
RHC12H2G0730.2.gene	0.723354	0.590022	0.845599	0.356116	0.167441	0.092438	0	0	0	0.259512	0.669113	0.603758	0	0.103116	0	0.370156	0.967573	0.510449	0.217815	0.449607	0.445059	0.101987	0	0.115518	--	--
RHC12H2G0729.2.gene	0.557906	1.25018	0.804847	0	0.197202	0.059775	0	0.088212	0.183196	0.101725	0.268709	0	0.128365	0	0	0.592618	0.183461	0	0	0	0	0.114856	0	0	--	--
RHC12H2G0727.2.gene	1.39121	1.48733	1.55698	0.471454	1.49713	0.153588	0.325116	0.126358	0.280599	0.32091	0.449824	0.764827	0	0.32753	0.583957	1.21527	1.70211	0.915585	0	0.282768	0.356611	0.315669	0.31063	0.168543	--	hypothetical protein A4A49_04990 [Nicotiana attenuata]
RHC12H2G0726.2.gene	0.843567	0.710611	0.608574	0.041006	0	0.084033	0	0	0	0	0.025732	0.357383	0	0	0	0.092596	0.353835	0.382141	0.03395	0.027544	0	0.045233	0	0	--	--
RHC12H2G0725.2.gene	1.08918	0.90041	0.43582	0.201371	0.175081	0.194786	0.1101	0.108607	0.158773	0	0.246301	0.070185	0.084309	0.296294	0.033039	0.962385	1.02515	0.906694	0.156552	0	0.156705	0.272171	0.30191	0.371965	--	hypothetical protein A4A49_04990 [Nicotiana attenuata]
RHC12H2G0723.2.gene	1.40091	3.94255	1.59888	0	0.107857	0.662892	0.486685	0	0.425092	0	0.093982	0.310234	0.793409	0	0.363033	0.512518	0.381482	0.800515	0.245412	0	0.441621	0.167468	0.144072	0.396401	--	--
RHC12H2G0722.2.gene	1.03242	1.48312	1.68944	0.298126	0.178689	0.091341	0.348197	0	0.136752	0.864939	0.48473	0.270674	0.194805	0.102852	0.14987	0.616398	1.23836	0.605181	0.95381	0.157795	1.08424	0.514258	0.159895	0.158416	--	--
RHC12H2G0720.2.gene	0.270202	0.419299	0	0	0	0	0	0	0	0	0	0	0	0	0	0.311641	0	0	0	0	0	0	0	0	--	--
RHC12H2G0719.2.gene	0.9407	0.538798	0.176788	0	0.107399	0	0	0	0.260921	0	0.152228	0.013854	0	0	0	0.241949	0	0.189553	0	0.360747	0.110508	0	0	0	--	--
RHC12H2G0717.2.gene	0.858516	0.430617	0.965238	0	0.282185	0.077793	0	0.165393	0.149565	0.273153	0.013136	0	0	0.179101	0	0.556612	0.17316	0.178186	0.01815	0.178275	0.148745	0	0	0	--	--
RHC12H2G0716.2.gene	0.706821	2.98604	4.82621	0	0.114136	0.210375	0.054406	0	0.436208	0.355783	0.886377	0.14547	0.285756	0.133663	0.279798	0.091552	1.1203	0	3.98831	0.316641	0.36456	0	0.129665	0.147927	--	--
RHC12H2G0715.2.gene	1.00336	2.17064	5.10878	0.407104	0.504368	0.613015	0.144658	0.26443	0.180027	1.33092	1.43934	0.386662	0.047803	0.171206	0.238747	0.59319	1.54262	0.021231	1.36428	0.424404	0.49292	0.221303	0.268257	0.201976	--	--
RHC12H2G0711.2.gene	5.65635	3.61423	4.65074	0.847385	0.150356	0.949161	0.791027	0.388013	0.565575	3.15281	1.15654	1.70379	1.33009	1.30719	0.380915	2.55808	2.27253	3.53164	0.953334	1.98863	1.66154	1.38679	0.586866	0.665671	--	--
RHC12H2G0710.2.gene	5.05464	5.65592	4.16926	2.60336	0.774314	1.94215	1.7789	0.395762	0.51653	1.99389	1.80643	2.307	1.06334	1.38011	0.732466	3.00233	5.16543	5.39933	1.46894	4.39949	2.46408	1.02872	0.288829	0.844236	--	--
RHC12H2G0707.2.gene	0.625548	0	0.615633	0	0	0.050946	0.003464	0	0.033615	0	0.141192	0.022167	0	0.037009	0	0	0.115267	0.111941	0	0	0	0.017906	0	0.102978	--	--
RHC12H2G0706.2.gene	0.438735	0.651083	0.259936	0	0	0.081121	0	0	0.102418	0.056626	0.003753	0.015132	0.151827	0.054186	0	0.093802	0	0.094153	0	0	0.125541	0.058979	0	0	--	--
RHC12H2G0703.2.gene	1.65029	0.74737	0.259936	0	0	0.081121	0	0	0.102418	0.056626	0.020642	0.092512	0.151827	0.093159	0	0.15582	0	0.201064	0.130682	0	0.226389	0.10809	0.0619	0	--	--
RHC12H2G0702.2.gene	1.31699	4.73905	2.4436	0.248053	0.863664	1.26886	0	0.474437	1.22709	0.406786	1.99042	1.18389	0.543131	0.77119	0.537742	1.88286	2.68435	1.48241	1.01428	0.749209	0.532251	0	0.024984	0.220082	--	--
RHC12H2G0701.2.gene	3.46914	3.19886	2.92005	1.62892	2.30167	1.25579	0.189619	0.304772	0.714627	0.779118	0.305727	0.463811	0.829005	0.791767	0.413284	3.17577	2.6185	1.54319	0.557366	0.940175	1.71679	0.404898	0.356305	0.361662	--	--
RHC12H2G0699.2.gene	0.692111	0.284577	0.80513	0	0	0.090321	0	0	0	0.154113	0	0	0	0.129954	0	1.23999	0.182041	0.103732	0.540305	0	0.267187	0.112108	0	0	--	--
RHC12H2G0698.2.gene	0.585601	0.505487	1.18086	0.182105	0.157017	0	0	0	0.155731	0.141547	0.26671	0.45185	0	0	0	0.354736	0.167447	0.79924	0	0	0	0.184793	0	0	--	--
RHC12H2G0697.2.gene	0.382712	0.798742	0.341266	0	0	0	0	0	0.089663	0	0	0	0.566352	0.164026	0.085384	0	0.040041	0	0	0	0.327074	0.259352	0	0	--	--
RHC12H2G0696.2.gene	3.55716	3.081	3.16475	0.886872	1.01468	0.085257	0.186745	0.282271	0.680899	0.145978	0.850183	0.483881	1.10605	0.543515	0.043145	1.63153	2.51868	1.18743	0.613759	0.487515	0.519165	0.424012	0.339915	0.368709	--	--
RHC12H2G0695.2.gene	4.91352	4.18872	4.35441	4.50905	4.5664	4.84398	4.08315	4.60937	3.23369	3.77798	3.33783	3.17862	1.55505	4.12874	1.54291	3.74964	4.09621	3.79834	5.0273	3.7117	3.82651	5.26434	5.36477	5.00942	Translation, ribosomal structure and biogenesis	PREDICTED: protein argonaute PNH1-like [Solanum pennellii]
RHC12H2G0694.2.gene	6.41306	6.91865	5.65181	6.77719	7.59149	7.85248	7.31318	7.11173	8.24798	5.54075	5.56137	6.66449	2.50892	5.97462	2.81434	4.34448	5.8662	5.28908	5.18581	4.13759	5.66288	6.28482	6.75022	5.94304	Function unknown	PREDICTED: transcription factor LUX [Solanum tuberosum]
RHC12H2G0693.2.gene	50.219	46.9319	50.7939	18.4824	18.7719	16.6264	41.3163	41.7343	44.0846	34.2392	33.9155	37.1828	35.0002	35.7215	36.3512	36.1667	33.5274	33.7742	35.2246	39.9881	40.2035	18.6602	18.4046	20.2113	Function unknown	PREDICTED: uncharacterized protein LOC102580389 isoform X1 [Solanum tuberosum]
RHC12H2G0692.2.gene	0.29501	0.371375	0.241447	0.080236	0.203553	0.118893	0.445902	0.213195	0.334571	0.134475	0.236699	0.061543	0.093589	0.351229	0.084695	0.532995	0.51344	0.167021	0.099875	0.271404	0.140145	0.274063	0.119343	0.025915	--	PREDICTED: 3-ketoacyl-CoA synthase 11-like [Solanum tuberosum]
RHC12H2G0691.2.gene	12.8006	16.7882	16.6779	24.6668	18.0733	21.9331	18.0726	12.5171	14.5927	15.9528	18.3265	15.7513	12.0518	15.7485	12.2035	18.3154	17.6334	20.1322	21.7996	24.1797	20.2559	23.9016	22.6579	24.3164	Chromatin structure and dynamics	PREDICTED: probable histone H2A variant 3 [Solanum lycopersicum]
RHC12H2G0689.2.gene	2.03495	2.07031	2.40769	2.50669	2.69114	2.27127	1.00113	1.35686	1.12176	1.67627	1.95735	1.40733	1.11495	0.978445	0.841254	1.79183	1.89679	2.14292	1.35367	1.55035	1.30218	2.42797	2.80812	2.86401	Intracellular trafficking, secretion, and vesicular transport	potassium channel AKT1-like [Solanum tuberosum]
RHC12H2G0688.2.gene	2.3789	2.82947	2.30794	1.74975	1.87854	1.75172	1.61539	1.53089	1.49368	2.22263	1.99087	2.19295	1.62722	2.21464	1.45794	1.63997	1.12874	0.850688	1.57263	2.0305	1.75422	1.26753	1.70794	1.48748	Secondary metabolites biosynthesis, transport and catabolism	PREDICTED: cytochrome P450 734A1-like [Solanum tuberosum]
RHC12H2G0687.2.gene	33.31	36.6926	26.0233	25.5671	26.2448	27.8847	23.0251	21.2218	23.1246	26.8844	13.6019	5.37906	35.0471	25.7312	28.0849	34.1009	16.1089	7.84087	22.102	29.6383	21.1561	24.6395	20.4228	21.1989	Function unknown	PREDICTED: acyl-protein thioesterase 2 [Solanum tuberosum]
RHC12H2G0686.2.gene	8.13408	9.63654	8.55249	7.52023	7.31731	8.05066	6.7748	7.25882	9.70508	7.0631	7.69327	7.72239	7.81812	9.85475	7.75209	8.83352	6.88891	7.07557	8.28537	8.0257	7.0815	6.72808	7.81564	6.25151	Function unknown	PREDICTED: deSI-like protein At4g17486 [Solanum tuberosum]
RHC12H2G0685.2.gene	2.70099	3.0384	3.11403	3.55596	3.03856	3.43251	3.51452	3.46884	3.50429	4.35081	3.78517	3.77678	2.56285	4.33368	2.99283	3.49691	2.69672	3.2491	4.39469	4.1556	3.54274	4.07297	3.64451	3.38475	Function unknown	PREDICTED: uncharacterized protein LOC102583294 [Solanum tuberosum]
RHC12H2G0684.2.gene	15.7669	15.3496	14.925	22.1139	20.8018	20.2553	20.9889	19.0196	18.5668	17.8752	20.8995	16.6368	17.3728	18.1985	16.3767	18.737	19.8392	20.6316	18.9174	16.7516	17.5253	22.1129	25.739	20.6114	Signal transduction mechanisms	PREDICTED: serine/threonine protein phosphatase 2A 57 kDa regulatory subunit B&apos; iota isoform-like [Solanum tuberosum]
RHC12H2G0683.2.gene	81.9367	78.0675	75.9718	88.6047	96.1166	92.7572	80.5509	82.0174	83.1909	94.896	87.4495	98.5374	72.4383	89.6606	74.2966	98.9971	96.9083	91.6586	91.344	91.1388	82.5967	115.978	97.9594	106.63	Lipid transport and metabolism	PREDICTED: palmitoyl-acyl carrier protein thioesterase, chloroplastic [Solanum tuberosum]
RHC12H2G0682.2.gene	6.82348	6.13371	5.55124	3.64582	5.00282	5.27471	4.83321	5.38631	4.15857	5.73288	5.40697	4.81001	3.57838	5.1142	4.71115	6.31537	6.2903	5.35442	6.25517	4.86908	5.63579	4.80233	6.1876	5.86543	Posttranslational modification, protein turnover, chaperones	PREDICTED: E3 ubiquitin-protein ligase At1g63170-like [Solanum tuberosum]
RHC12H2G0679.2.gene	17.782	17.268	17.3637	9.66655	12.0657	10.3227	16.3697	16.492	15.463	14.0863	9.83485	13.7277	24.5705	12.5673	29.9061	10.9785	13.0432	12.8197	16.2251	12.0064	13.5482	10.0061	8.73211	9.52968	Function unknown	PREDICTED: leucine-rich repeat extensin-like protein 4 [Solanum tuberosum]
RHC12H2G0678.2.gene	8.0321	7.74603	9.064	4.4798	4.74377	5.11681	6.89012	7.55974	7.55597	5.76744	4.98769	6.44021	10.7548	7.11463	12.1144	4.20941	5.57005	4.58873	6.57941	6.9524	7.6592	5.33192	4.14277	6.15746	Function unknown	PREDICTED: leucine-rich repeat extensin-like protein 4 [Solanum tuberosum]
RHC12H2G0676.2.gene	18.4251	16.0819	19.2187	13.6124	14.5091	17.6161	11.4865	15.343	15.016	21.855	18.6791	19.3935	11.5438	19.8562	12.4439	15.6494	16.4255	16.2728	21.034	19.6832	25.5923	16.3003	16.3334	21.5262	Intracellular trafficking, secretion, and vesicular transport	PREDICTED: probable ADP-ribosylation factor GTPase-activating protein AGD14 [Solanum pennellii]
RHC12H2G0675.2.gene	16.7116	14.5365	15.1772	8.07995	8.49335	8.73631	13.1827	13.9161	14.0286	11.043	9.55248	11.4523	18.5059	12.8787	23.5857	7.87485	10.0365	8.77309	13.8932	12.0226	12.4243	10.2398	7.95277	11.2064	Function unknown	PREDICTED: leucine-rich repeat extensin-like protein 3, partial [Solanum tuberosum]
RHC12H2G0674.2.gene	5.3916	5.79421	4.55978	5.32301	6.79373	4.69199	7.85373	9.49699	6.27599	9.07079	9.67542	8.51961	3.50164	9.41095	5.67462	6.15825	3.9747	6.90435	7.85651	8.11831	7.76054	8.83786	6.74447	6.59411	Intracellular trafficking, secretion, and vesicular transport	PREDICTED: probable ADP-ribosylation factor GTPase-activating protein AGD14 [Solanum pennellii]
RHC12H2G0673.2.gene	3.48872	4.34083	6.087	5.65801	6.58769	7.14002	2.31782	2.21807	4.03599	5.2502	6.54127	3.58927	2.56137	3.69816	1.9453	4.64015	3.5699	2.12901	3.34647	2.75942	2.2549	4.44981	3.79716	6.75128	Function unknown	PREDICTED: uncharacterized protein LOC102589356 [Solanum tuberosum]
RHC12H2G0672.2.gene	219.378	210.805	238.772	301.903	259.226	288.836	233.531	225.482	237.036	309.452	339.208	324.186	190.878	304.796	214.31	304.924	253.246	253.147	316.834	337.007	327.347	318.566	308.874	312.002	Function unknown	PREDICTED: uncharacterized protein LOC102589677 [Solanum tuberosum]
RHC12H2G0671.2.gene	127.433	130.753	120.451	50.0844	43.735	49.2949	103.122	102.82	105.95	80.6786	74.523	63.7528	80.4466	85.1744	96.8752	82.8585	87.6332	91.6462	73.809	82.5377	88.4299	41.99	49.7345	42.5962	Cell cycle control, cell division, chromosome partitioning	PREDICTED: fe-S cluster assembly factor HCF101, chloroplastic isoform X1 [Solanum tuberosum]
RHC12H2G0670.2.gene	1.62036	1.79824	1.88433	1.01979	0.996837	1.3724	0.53191	0.737876	0.517527	0.956259	0.71015	0.996099	0.576805	1.70834	0.359988	2.78237	2.92857	2.88586	0.950779	1.31749	1.40815	2.45553	1.7166	1.96056	Function unknown	PREDICTED: uncharacterized protein LOC102590897 [Solanum tuberosum]
RHC12H2G0669.2.gene	0.52802	0.123564	0	0.618881	0	0.461557	0	0.067716	0.105423	0	0.134017	0.281992	0.069665	0.289691	0	0	0	0.25339	0	0	0.381947	0.205112	0	0.097023	Energy production and conversion	Aldehyde dehydrogenase family 2 member C4 [Capsicum baccatum]
RHC12H2G0668.2.gene	0.518356	1.23515	4.71212	5.51927	0.631583	2.85154	3.18178	2.65017	2.51213	2.75415	2.18501	3.14757	2.86595	0	0.397799	6.4862	0.808112	5.74549	0.395989	3.90705	2.88562	2.06851	0	4.88803	Energy production and conversion	PREDICTED: aldehyde dehydrogenase family 2 member C4-like [Solanum tuberosum]
RHC12H2G0664.2.gene	9.99961	10.158	9.99474	9.13987	8.15426	9.51139	4.93023	5.1174	6.54514	7.92349	6.77594	6.16218	4.30657	9.91987	6.36839	10.6309	11.5719	13.1034	8.35842	8.30313	9.73589	12.2416	10.4443	10.9799	Energy production and conversion	PREDICTED: aldehyde dehydrogenase family 2 member C4-like [Solanum tuberosum]
RHC12H2G0661.2.gene	2.50222	2.94726	4.21382	9.55828	5.86068	9.27044	3.95616	2.31497	1.74446	10.6262	5.13389	2.38795	1.5879	4.84891	1.56708	3.09786	3.85803	2.95217	3.32113	2.69814	3.51568	3.66981	8.53003	2.98936	--	PREDICTED: uncharacterized protein DKFZp434B061-like [Solanum tuberosum]
RHC12H2G0658.2.gene	0.592794	0.593584	0.358072	0.502293	0.635124	0.765156	0.470063	0.586121	0.589852	0.312408	1.12402	0.33344	0.568692	0.520727	0.457574	0.666204	0.550016	0.235719	0.691873	0.604561	0.952086	0.790938	0.882711	0.860214	Function unknown	PREDICTED: kinesin light chain 3 isoform X2 [Solanum tuberosum]
RHC12H2G0656.2.gene	0.708078	0.404576	0.404669	0.251834	0.277885	0	0	0	0	0	0.326977	0	0	0.286509	0	0.511435	0.217977	0.132378	0	0.216944	0.053376	0	0	1.0155	Function unknown	--
RHC12H2G0652.2.gene	3.07852	2.12528	2.28703	1.6483	1.02408	2.23833	1.83438	1.91953	1.20537	1.69169	1.69261	3.04502	2.28168	2.02171	2.28149	1.79895	1.83236	2.05069	1.4964	1.91558	1.3691	2.14542	1.6776	1.83849	Function unknown	ribosomal protein S1 (mitochondrion) [Solanum lycopersicum]
RHC12H2G0650.2.gene	2.01403	3.06076	2.96416	2.05481	3.25142	2.98891	2.72632	2.36622	2.77309	1.83736	1.52206	3.17157	2.61284	2.92892	2.36856	2.68484	3.95851	0.654956	1.51228	0.49685	2.67289	2.89595	4.37322	3.79538	Function unknown	ATP synthase subunit 8 (mitochondrion) [Solanum lycopersicum]
RHC12H2G0649.2.gene	1.8663	3.30067	4.92964	4.69363	3.32617	4.52119	4.94101	4.14518	3.45532	3.53054	2.38928	4.61294	3.72217	3.88199	3.90461	4.46539	3.63405	0.61881	3.0755	1.03476	2.85006	5.47566	6.16012	6.06257	Energy production and conversion	cytochrome oxidase subunit 3 [Nicotiana tabacum]
RHC12H2G0643.2.gene	0.47883	0.096494	0.256245	0.197984	0.300463	0.055745	0.552773	0.107353	0.16388	0.117328	0.133607	0.329108	0.12318	0.20279	0.171946	0.317639	0.294766	0.087984	0.16096	0.215535	0.28289	0.057133	0.507183	0.46172	Energy production and conversion	apocytochrome b (mitochondrion) [Capsicum annuum]
RHC12H2G0642.2.gene	1.83542	9.38103	10.0226	17.9971	1.03275	17.7015	18.0473	0.770243	18.9082	16.1984	28.1469	0.984596	0.579856	10.3561	10.2402	18.4956	20.3186	8.74591	11.5316	1.05114	12.8574	1.39376	37.3	16.3796	--	PREDICTED: ATP synthase subunit alpha, mitochondrial-like [Nicotiana tabacum]
RHC12H2G0632.2.gene	9.57288	8.59573	7.61726	7.30422	3.9535	6.93619	7.26485	6.66043	7.00869	5.08852	5.25036	3.87747	4.49458	4.63426	7.95529	7.6949	7.31362	5.76407	4.2324	5.43418	4.14486	9.30228	9.38802	11.0465	--	orf261 (mitochondrion) [Solanum commersonii]
RHC12H2G0618.2.gene	0.352922	0.311487	0.462935	0.37928	0.241178	0.405061	0.46292	0.475613	0.474221	0.584126	0.464325	0.508572	0.392944	0.623017	0.398668	0.236789	0.522398	0.268218	0.487737	0.655829	0.519018	0.57813	0.301962	0.347582	Replication, recombination and repair	maturase, partial (mitochondrion) [Solanum tuberosum]
RHC12H2G0616.2.gene	0.383811	0.239339	0.08623	0.351679	0.293188	0.164585	0	0.22764	0.277391	0.119322	0.215019	0.065643	0.039608	0.142225	0	0.191742	0.054147	0	0.105987	0	0.126711	0.149417	0.286137	0.050603	Function unknown	PREDICTED: uncharacterized mitochondrial protein AtMg01010 [Solanum tuberosum]
RHC12H2G0604.2.gene	0.679693	0.212719	0.27458	0.338431	0.537422	0.200873	0.346892	0.318627	0.351705	0.181421	0.366863	0.426754	0.115058	0.235133	0.338885	0.446205	0.260682	0.282869	0.143807	0.166403	0.16951	0.334867	0.37506	0.595757	Energy production and conversion	NADH dehydrogenase subunit 6 (mitochondrion) [Capsicum annuum]
RHC12H2G0603.2.gene	0.887407	0.456952	0.438429	0.460783	0.494152	0.48656	1.00219	1.31046	0.47286	0.514164	0.555739	0.774795	0.317501	0.634143	1.13431	0.907171	1.07806	0.255843	0.621133	0.306183	0.355856	1.19881	1.3129	0.841258	Translation, ribosomal structure and biogenesis	ribosomal protein S4, partial (mitochondrion) [Solanum commersonii]
RHC12H2G0598.2.gene	0.337107	0.188787	0.1211	0	0.175808	0	0	0.063717	0	0	0.303627	0.122842	0	0.462344	0.0848	0	0	0	0.111347	0.334777	0	0	0.57938	0.037393	--	hypothetical protein AT2G07705 [Arabidopsis thaliana]
RHC12H2G0597.2.gene	0.392592	0	0	0.067136	0	0.157943	0	0.138517	0	0	0.197701	0	0.099939	0.239921	0.138764	0	0	0.334081	0	0	0.305953	0.090205	0.171652	0.159103	--	--
RHC12H2G0596.2.gene	0.350803	0.113274	0.06852	0.182809	0.14634	0.233266	0.160081	0.130028	0.063533	0.244137	0.313913	0.227341	0.033094	0.467581	0.11895	0.103562	0.101246	0.157526	0.217378	0.31239	0.213501	0.133582	0.147894	0.248111	--	60S ribosomal protein L2, mitochondrial [Capsicum chinense]
RHC12H2G0591.2.gene	0.835406	0.388779	0.499389	0.352422	0.425054	0.587452	0.112352	0.590448	0.401996	0.449107	0.582012	0.767296	0.541362	0.691927	0.356397	0.462105	0.009975	0.248016	0.346248	0.562486	0.328298	0.303206	0.141385	0.029588	Posttranslational modification, protein turnover, chaperones	hypothetical protein (mitochondrion) [Solanum tuberosum]
RHC12H2G0588.2.gene	1.41472	1.46122	0.874847	1.25234	0.27136	1.20457	1.63508	1.20948	1.25076	1.21798	0.654334	1.13926	1.54707	1.56584	1.45579	1.06601	0.777208	1.25876	0.613446	1.57884	1.76583	1.7911	0.916856	1.61491	Energy production and conversion	orf107b gene product (mitochondrion) [Beta vulgaris subsp. vulgaris]
RHC12H2G0587.2.gene	0.430256	0.152201	0.118092	0.192126	0.04661	0.837468	0.352155	0.726678	0.434667	0.475801	0.244839	0.360132	0.458194	0.356314	0.158588	0.278061	0.399933	0.7039	0.213237	0.165205	0.383867	0.625906	0.41449	0.488409	Energy production and conversion	hypothetical protein NitaMp087 [Nicotiana tabacum]
RHC12H2G0586.2.gene	0.485006	0.513215	0	0.69222	0	0.642151	0	0.165289	0.16409	0.53826	0.087291	0	0.300375	0.414482	0.286411	0.006745	0.017186	0.222805	0.341132	0.383724	0.331593	0.220454	0.087445	0.230798	--	hypothetical protein BVC80_6935g6 [Macleaya cordata]
RHC12H2G0585.2.gene	0.49006	0.160923	0.238923	0.306226	0.245824	0.280889	0.321844	0.415725	0.06237	0.119575	0.287077	0.265892	0.392875	0.297881	0.238378	0.159985	0.223766	0.22741	0.097829	0.232126	0.159876	0.148799	0.276999	0.328717	Energy production and conversion	hypothetical protein L195_g038840 [Trifolium pratense]
RHC12H2G0575.2.gene	0.924483	0.661516	0.371509	0.393037	0.356436	0.216749	0.23987	0.425153	0.124716	0.261361	0.841823	0.901348	0.045036	0.211039	0.113694	0.51879	0.511484	0.196634	0.891309	0.295529	0.808293	0.565832	1.48022	0.808758	Energy production and conversion	NADH dehydrogenase subunit 9 (mitochondrion) [Solanum pennellii]
RHC12H2G0560.2.gene	22.4637	7.51289	5.73945	8.26793	9.03208	10.5481	12.9284	12.553	11.1054	8.14485	21.5817	21.4592	9.66843	6.26441	8.71354	9.4405	15.918	10.8411	10.9606	11.8912	7.76182	18.5948	17.9487	12.5636	--	hypothetical protein T459_14936 [Capsicum annuum]
RHC12H2G0557.2.gene	0.356583	0.83792	0.552018	0	0	0	0.169749	0.497207	0.150453	0	0.307916	0.214378	0.164006	0.156793	0.142403	0.482583	0.370202	0	0.170866	0.366052	0	0.386149	0.020999	0.205196	--	hypothetical protein T459_15503 [Capsicum annuum]
RHC12H2G0554.2.gene	0.768707	0.963482	1.70524	3.9314	5.3999	1.57537	1.00574	5.34403	5.17119	3.22709	0.913029	2.26214	1.51209	2.88849	1.01268	0.486647	6.14405	0.400911	3.18966	0.823125	1.00776	5.96814	6.67654	6.07113	Energy production and conversion	ATP synthase subunit 1 (mitochondrion) [Solanum lycopersicum]
RHC12H2G0553.2.gene	0.919394	0.529366	0.836077	0.760506	0.485271	0.720006	0.626379	0.53898	0.827232	0.538348	0.620797	0.763598	0.458993	0.463331	0.416242	0.727483	0.944434	0.437876	0.50278	0.712358	0.483238	0.867751	0.911262	0.826292	--	hypothetical protein T459_27558 [Capsicum annuum]
RHC12H2G0549.2.gene	9.49091	10.3404	11.4131	7.196	9.07006	8.83545	9.86627	9.81838	9.69224	4.11329	4.58991	4.63918	8.72949	6.53236	6.60423	9.09834	6.17747	7.62525	5.92197	5.81892	7.32866	6.57246	5.97708	6.76895	Intracellular trafficking, secretion, and vesicular transport	PREDICTED: chloroplast processing peptidase [Solanum tuberosum]
RHC12H2G0548.2.gene	3.67416	4.30318	4.83563	4.43643	3.44135	3.55552	5.06399	4.58836	5.64417	5.25385	5.12117	4.23402	5.87851	5.27826	4.84007	4.03561	3.36414	5.46404	5.16511	5.36975	3.41283	5.58737	3.1206	3.90067	Function unknown	PREDICTED: protein CONTINUOUS VASCULAR RING 1-like [Solanum tuberosum]
RHC12H2G0547.2.gene	0.658659	0.627529	0.629073	0.923075	1.6709	0.506231	0.832104	1.14596	0.935727	1.06236	0.487759	0.792543	0.801847	0.804934	0.343176	1.19566	0.59512	1.06031	0.743728	0.422278	0.497237	1.07474	1.19459	0.967253	Function unknown	PREDICTED: uncharacterized protein LOC102595343 [Solanum tuberosum]
RHC12H2G0546.2.gene	0.60754	0.2663	0.431122	0.713856	0.546028	0.434829	0.51669	0.457845	0.370801	0.60053	0.389551	0.244644	0.138644	0.374907	0.026473	0.41927	0.425273	0.244549	0.335046	0.490671	0.330422	0.300246	0.32644	0.257777	Function unknown	PREDICTED: rho guanine nucleotide exchange factor 8-like [Solanum tuberosum]
RHC12H2G0545.2.gene	2.26723	2.97943	3.08206	16.8828	16.1573	16.0188	3.17383	2.14778	2.84066	5.66517	4.811	6.16822	2.26691	5.62978	3.03058	7.448	6.75138	8.0799	3.77977	4.87715	3.8214	6.91628	5.95766	6.18	Function unknown	PREDICTED: protein ABIL2-like [Solanum tuberosum]
RHC12H2G0544.2.gene	8.91536	8.47172	8.78704	11.6093	14.7726	13.1877	4.61415	7.2801	6.98431	9.51522	8.60437	9.23273	6.66111	10.374	7.05699	8.58138	10.474	10.5453	10.0587	10.3296	10.2592	13.67	11.5564	14.5952	Lipid transport and metabolism	PREDICTED: peroxisomal fatty acid beta-oxidation multifunctional protein AIM1 [Solanum tuberosum]
RHC12H2G0543.2.gene	1.23376	1.74987	1.33663	2.04754	2.41666	1.65661	1.0861	1.44406	0.88137	1.27762	1.36936	1.23489	0.67369	1.66557	1.15124	1.87415	1.44186	2.33381	1.72684	1.32418	1.9358	1.59853	2.56011	1.89224	Function unknown	PREDICTED: protein tesmin/TSO1-like CXC 5 [Solanum tuberosum]
RHC12H2G0542.2.gene	14.2288	16.5161	13.8694	15.1119	12.557	9.84841	9.85756	13.1945	12.0864	14.1178	12.3172	18.2815	9.53671	15.5383	11.9326	16.1438	16.4352	12.4109	16.4256	15.0935	19.0207	15.5918	16.393	16.7961	Signal transduction mechanisms	PREDICTED: cyclin-dependent kinase F-1 [Solanum tuberosum]
RHC12H2G0541.2.gene	2.17644	1.63573	1.8097	2.46281	3.04878	2.25251	1.64771	1.31207	1.12509	1.22924	1.65308	0.954993	0.58411	1.07417	0.742388	2.52814	0.820782	1.71326	1.32346	1.26631	1.9083	1.7286	2.33622	1.89781	Amino acid transport and metabolism	PREDICTED: protein NRT1/ PTR FAMILY 1.1-like [Solanum lycopersicum]
RHC12H2G0540.2.gene	23.3593	24.2662	30.6652	20.105	15.4205	17.5542	18.9167	15.4672	16.9935	22.377	24.8419	19.7089	11.7159	21.8088	10.6169	12.3451	18.952	17.3308	24.9564	22.8854	20.04	15.9996	12.6787	15.8921	Transcription	PREDICTED: auxin-responsive protein IAA27 [Solanum tuberosum]
RHC12H2G0535.2.gene	14.7975	17.5896	18.0809	16.6706	16.2433	15.1961	13.4686	15.4228	15.8492	14.1219	23.1251	18.0223	10.1382	19.4782	9.15159	11.8331	13.4338	14.231	24.8719	20.6707	15.3442	13.6956	18.1567	13.5054	Signal transduction mechanisms	PREDICTED: casein kinase I [Solanum tuberosum]
RHC12H2G0533.2.gene	0.533136	0.671821	0.329679	0.964354	1.20264	1.09625	5.56149	4.81837	5.23981	4.5772	5.01774	3.91861	1.45696	4.43211	0.882272	2.63866	3.07946	2.63375	4.15211	4.09764	4.14652	2.25326	1.49181	1.65268	--	hypothetical protein CQW23_06453 [Capsicum baccatum]
RHC12H2G0529.2.gene	43.5388	42.969	41.2031	45.2715	46.984	45.5975	46.34	46.0507	47.3835	38.0185	34.1589	38.3606	33.991	39.4893	34.6371	42.7463	43.4247	44.194	35.467	38.1546	37.5449	37.7152	35.1711	39.446	Amino acid transport and metabolism	PREDICTED: probable lactoylglutathione lyase, chloroplastic [Solanum tuberosum]
RHC12H2G0528.2.gene	0.443611	0	0	0	0.251208	0	0	0.287472	0	0	0.155536	0.157415	0	0	0	0.200285	0	0	0	0.286264	0.188338	0.251369	0.0831	0.219324	--	--
RHC12H2G0527.2.gene	0.292134	0.253789	0.543336	0.087505	0.054315	0.135963	0.133501	0.087679	0.054265	0	0.044442	0	0.08633	0.154459	0.040292	0.123657	0.278711	0.248923	0.125727	0.083267	0.097228	0.275182	0.153791	0.146273	Posttranslational modification, protein turnover, chaperones	PREDICTED: E3 ubiquitin-protein ligase ATL42-like [Solanum tuberosum]
RHC12H2G0524.2.gene	3.62839	3.68815	4.22175	5.14356	5.07531	5.84111	3.57971	3.68982	3.97955	4.76563	4.60199	4.99799	2.49035	3.74269	2.60428	5.56367	4.56851	5.55226	4.72184	4.29686	5.00461	4.85911	5.40464	4.86368	Function unknown	PREDICTED: probable glycosyltransferase At3g07620 [Solanum tuberosum]
RHC12H2G0523.2.gene	4.90488	4.49622	5.45131	2.65925	2.47237	2.88774	2.93053	3.00385	2.9625	3.97554	3.49425	3.28385	1.96229	4.22031	2.61646	3.04159	2.60061	2.89311	3.95422	3.34217	3.70481	3.71305	3.79863	3.54578	Transcription	PREDICTED: ethylene-responsive transcription factor ERF037-like [Solanum tuberosum]
RHC12H2G0522.2.gene	16.4904	13.4397	13.5875	26.9695	27.0518	24.8575	22.4466	22.8654	25.0404	16.5854	16.7628	16.4124	18.3266	20.8091	17.8184	16.6499	18.6614	17.8489	22.6795	17.3139	18.0984	25.5975	25.2411	25.7073	Function unknown	PREDICTED: dolichyl-diphosphooligosaccharide--protein glycosyltransferase subunit STT3A [Solanum tuberosum]
RHC12H2G0521.2.gene	13.3808	14.5454	13.896	27.5806	13.8221	13.9261	11.3048	16.3947	14.2115	37.8875	18.4425	21.0644	10.79	16.1747	22.8774	12.3146	15.2626	13.8585	31.8435	21.3822	33.2472	35.3761	16.455	31.7067	RNA processing and modification	PREDICTED: SNW/SKI-interacting protein [Solanum tuberosum]
RHC12H2G0519.2.gene	19.3944	19.6421	20.126	5.5392	5.34276	6.18035	13.9525	13.1609	13.5179	13.5182	18.1966	13.3881	13.2742	14.5941	11.419	10.2778	7.57862	10.1977	12.5341	13.4199	13.4899	4.77905	5.24478	5.66837	Function unknown	PREDICTED: uncharacterized protein LOC102602401 [Solanum tuberosum]
RHC12H2G0518.2.gene	4.73299	7.14215	5.06297	5.05114	5.18992	5.08762	5.39814	5.66538	3.39335	5.49438	4.57107	4.85172	2.68739	6.4485	2.65774	4.59104	4.43695	5.45979	4.46768	4.01002	4.43915	5.21528	6.99696	5.23821	Intracellular trafficking, secretion, and vesicular transport	PREDICTED: golgin candidate 1 [Solanum tuberosum]
RHC12H2G0517.2.gene	0.61338	0.863191	0.515423	0.939688	1.42935	1.43954	0.586188	0.675802	0.402638	1.13936	0.892602	0.871403	0.441417	0.37395	0.533479	0.658074	0.850555	0.853795	1.00873	0.922712	1.06646	0.87996	1.23987	0.865015	Function unknown	PREDICTED: LRR receptor-like serine/threonine-protein kinase EFR [Solanum tuberosum]
RHC12H2G0516.2.gene	4.08891	3.26411	3.9633	5.76126	6.6117	7.09405	2.88007	3.84276	2.69944	4.58813	4.88932	3.99417	2.07472	5.25051	2.09714	4.14244	4.51537	4.05359	5.98498	5.24187	4.8802	6.62665	5.27847	6.11003	Transcription	PREDICTED: probable RNA-dependent RNA polymerase 5 [Solanum tuberosum]
RHC12H2G0510.2.gene	2.11276	3.3352	3.84494	2.17758	3.43117	2.23846	3.24649	2.62899	2.09147	4.35019	3.95111	2.15718	2.38817	3.54436	1.79462	2.94107	3.54604	3.11142	3.4483	2.6005	4.13586	3.23793	3.01747	2.99625	Function unknown	PREDICTED: uncharacterized protein C3F10.06c isoform X1 [Solanum tuberosum]
RHC12H2G0509.2.gene	2.71222	2.08003	3.18251	3.24522	2.91961	2.84298	0.664199	1.29135	1.59398	0.576482	2.55287	1.14955	0	2.76733	0.627045	2.30368	2.86493	2.427	3.16214	2.90272	1.51918	2.45121	2.79266	1.86059	Function unknown	PREDICTED: uncharacterized protein LOC102604206 [Solanum tuberosum]
RHC12H2G0508.2.gene	19.6878	14.7927	21.3969	30.0453	29.9277	24.4002	15.6221	12.6564	12.1662	16.7556	23.284	14.0722	12.7805	17.9824	15.9657	22.8072	17.6674	25.1663	21.04	25.8846	17.0276	20.5535	24.4647	22.7843	--	PREDICTED: cytochrome B5-like protein [Solanum tuberosum]
RHC12H2G0507.2.gene	2.26924	2.26689	1.5606	3.49261	3.17549	3.13881	5.8578	6.44039	5.30722	3.14068	2.81103	2.62717	7.62169	2.6949	6.91448	3.53038	2.54702	3.50014	2.42232	2.65297	2.58604	1.96145	4.27769	2.97896	Cell wall/membrane/envelope biogenesis	PREDICTED: uncharacterized protein LOC102605099 isoform X1 [Solanum tuberosum]
RHC12H2G0506.2.gene	0.855086	1.08833	0.99924	1.21177	1.2458	1.64616	1.00933	0.773947	0.987884	1.25663	0.82654	1.10982	0.623472	1.54563	0.768109	0.866407	1.16836	1.18872	1.50632	1.43651	1.24987	0.915604	1.31081	1.2086	Function unknown	PREDICTED: receptor-like protein kinase 5 [Solanum tuberosum]
RHC12H2G0505.2.gene	1.24214	1.01045	1.38878	6.76124	8.66217	6.89045	1.15572	1.96917	1.51072	2.05866	1.6359	2.20598	0.981771	1.66522	0.708446	4.41282	4.14455	4.16218	1.64429	2.13975	1.69178	9.41494	9.2818	9.33724	Carbohydrate transport and metabolism	PREDICTED: hexokinase-1 isoform X1 [Solanum tuberosum]
RHC12H2G0504.2.gene	2.56568	2.82412	2.76624	2.24402	2.67469	2.58121	2.75329	1.5381	2.54339	3.123	2.39535	3.18641	1.61055	2.61448	1.20257	1.57556	1.407	0.957317	2.89124	2.70786	2.74031	1.18135	1.57841	1.15315	Function unknown	PREDICTED: protein IQ-DOMAIN 14-like [Solanum tuberosum]
RHC12H2G0503.2.gene	22.1837	22.4893	18.881	24.7474	23.4671	24.319	13.4458	9.76283	9.15222	28.1063	31.5117	28.1029	9.08611	23.6758	8.66375	14.9503	9.362	10.4171	24.063	22.7032	26.2626	6.28198	8.05973	6.08209	Carbohydrate transport and metabolism	PREDICTED: probable pectinesterase 53 [Solanum lycopersicum]
RHC12H2G0502.2.gene	2.90649	2.75249	3.26933	5.70506	5.30844	5.56198	2.62437	2.68472	1.81206	2.44591	2.10293	2.35837	1.93252	2.52451	2.00361	3.70355	2.7158	3.04058	3.15668	2.33747	2.76021	3.75303	4.12149	3.7239	Function unknown	PREDICTED: probable glutamate carboxypeptidase 2 [Solanum tuberosum]
RHC12H2G0501.2.gene	37.2424	43.4871	54.7978	257.38	227.427	239.172	328.434	268.18	291.509	199.743	270.464	204.036	106.38	133.196	114.762	365.342	227.07	254.544	197.991	155.83	157.988	376.736	434.858	349.45	Function unknown	hypothetical protein A4A49_42093 [Nicotiana attenuata]
RHC12H2G0500.2.gene	11.2806	9.74465	8.89385	8.85333	9.41594	7.29309	8.36411	9.6697	8.74672	7.52197	7.11831	8.23267	7.86313	8.56005	8.16096	7.70307	8.74918	8.8902	7.39389	9.47287	9.21138	9.4911	7.89365	7.95164	Translation, ribosomal structure and biogenesis	PREDICTED: arginine--tRNA ligase, cytoplasmic-like isoform X1 [Solanum tuberosum]
RHC12H2G0499.2.gene	5.66405	6.46213	4.52763	15.471	16.0544	15.2654	9.30465	7.16119	9.9761	13.0711	11.4798	11.811	9.19476	12.9352	10.5256	11.6657	13.5237	14.1821	10.8331	9.99501	9.96625	13.5887	15.0612	14.5664	Carbohydrate transport and metabolism	glucan endo-1,3-beta-glucosidase 13-like precursor [Solanum tuberosum]
RHC12H2G0498.2.gene	181.879	172.695	237.666	96.9735	68.2723	80.335	138.141	124.91	157.709	98.6864	119.449	104.249	157.943	117.107	180.748	99.9863	88.9516	89.8406	121.439	112.815	116.019	72.5692	76.9187	73.1415	Posttranslational modification, protein turnover, chaperones	PREDICTED: profilin-1-like [Solanum tuberosum]
RHC12H2G0497.2.gene	2.88408	2.64475	2.47428	3.18142	3.13348	3.34482	2.55456	2.36277	2.03932	2.74641	3.26352	2.80009	3.87268	4.05578	4.21594	0.763422	0.472431	0.547511	3.67224	4.03893	3.67431	0.760091	0.729851	0.486909	Function unknown	PREDICTED: uncharacterized protein LOC102579879 [Solanum tuberosum]
RHC12H2G0496.2.gene	2.03498	1.45245	1.77381	1.66076	1.15497	1.12469	0.619039	0.73539	1.08388	0.655193	0.958597	0.537429	0.732736	0.86877	0.773292	0.838095	1.25831	1.31258	1.09975	1.3872	1.43919	0.975478	0.593578	0.593926	--	PREDICTED: uncharacterized protein LOC102580201 [Solanum tuberosum]
RHC12H2G0495.2.gene	10.6301	8.85075	11.0323	17.8119	20.4439	20.4579	33.547	24.163	24.1449	25.8599	25.0672	22.1514	23.1369	24.321	24.2833	22.5984	19.6495	19.0564	26.6738	28.1319	20.0729	16.3683	17.9345	19.0969	Signal transduction mechanisms	PREDICTED: putative dual specificity protein phosphatase DSP8 [Solanum tuberosum]
RHC12H2G0494.2.gene	43.4411	41.8699	41.4163	31.5141	32.9186	35.7984	30.503	34.2442	34.0882	26.2477	24.4504	25.8001	36.9049	34.8708	33.6028	29.2648	35.7049	35.8472	32.277	33.5265	31.2361	34.0357	33.8031	34.0334	Posttranslational modification, protein turnover, chaperones	mitochondrial-processing peptidase subunit alpha [Solanum tuberosum]
RHC12H2G0493.2.gene	13.8856	14.1238	13.7327	41.0173	43.2942	43.1461	17.847	18.7045	17.0461	21.3458	21.5739	21.8591	10.5241	23.7196	12.9779	56.3656	55.1706	54.8584	24.2225	21.3178	24.1465	77.6521	77.8774	76.7806	Amino acid transport and metabolism	PREDICTED: gamma-glutamyltranspeptidase 3 [Solanum tuberosum]
RHC12H2G0492.2.gene	1.56031	1.5317	1.59797	0.40613	0.489311	0.763672	4.95057	4.86224	5.44918	5.29739	4.69226	4.59823	1.03607	9.09601	1.73817	1.76594	1.15917	1.42338	9.6698	8.22488	11.8521	1.42418	2.27242	1.0747	Function unknown	PREDICTED: inositol oxygenase 4-like [Solanum tuberosum]
RHC12H2G0491.2.gene	7.67338	8.17155	7.82355	27.2881	22.9597	25.4953	10.922	14.6534	11.7822	22.7357	26.9185	23.7451	6.88348	15.6569	8.26223	11.5836	14.6796	13.4169	15.4419	15.0857	14.2753	22.4777	23.4429	23.5661	Function unknown	PREDICTED: zinc finger CCCH domain-containing protein 20 [Solanum tuberosum]
RHC12H2G0490.2.gene	0.793525	0.86518	0.86176	0.497984	0.863669	0.638148	1.24833	1.16018	1.33224	0.739451	0.878027	0.764768	1.87232	1.36826	1.6224	1.45836	0.770509	1.11954	1.04387	1.04601	1.24955	1.04757	0.596798	0.858497	Cell cycle control, cell division, chromosome partitioning	uncharacterized protein A4U43_C05F26710 [Asparagus officinalis]
RHC12H2G0489.2.gene	3.08717	4.39215	3.86506	5.95755	6.41398	6.21303	2.57008	2.60144	2.72765	2.62799	4.05662	2.35192	1.68319	2.96194	1.70851	4.25662	4.7991	4.20437	3.1516	2.80498	3.27785	6.75867	6.76877	7.98914	Amino acid transport and metabolism	PREDICTED: IAA-amino acid hydrolase ILR1-like 4 [Solanum tuberosum]
RHC12H2G0488.2.gene	71.5507	58.0697	78.5654	53.5055	38.342	44.5833	44.329	40.1392	44.4802	27.4313	40.1272	32.2282	40.9782	40.8362	47.9994	37.3298	32.3007	31.5189	53.9471	43.7704	41.3325	41.7405	39.9867	42.6372	Translation, ribosomal structure and biogenesis	hypothetical protein TanjilG_05449 [Lupinus angustifolius]
RHC12H2G0487.2.gene	4.99922	5.66573	5.24241	7.17993	6.20134	6.22487	4.16253	5.99937	4.07579	5.0188	6.0547	5.27775	3.68501	5.12035	3.91037	6.44137	5.67575	4.93064	4.72629	4.84207	4.46831	6.36913	5.65977	5.84606	Posttranslational modification, protein turnover, chaperones	PREDICTED: probable zinc protease PqqL isoform X1 [Solanum tuberosum]
RHC12H2G0486.2.gene	408.605	467.85	511.772	424.987	379.758	347.302	370.209	317.827	337.525	288.2	412.666	299.17	366.152	315.915	324.101	320.623	231.231	225.08	349.45	373.773	356.316	314.998	333.015	285.709	Translation, ribosomal structure and biogenesis	PREDICTED: 60S ribosomal protein L31 [Solanum lycopersicum]
RHC12H2G0485.2.gene	43.0915	51.0844	50.1414	44.9149	42.2593	46.5271	41.1099	42.8813	48.3019	36.7218	42.4725	36.7239	44.4416	35.9614	42.3382	50.1367	44.6781	45.0609	39.6516	44.5225	36.2234	45.0554	47.74	49.5342	Lipid transport and metabolism	hypothetical protein T459_24332 [Capsicum annuum]
RHC12H2G0483.2.gene	34.8797	36.0695	36.1295	32.4038	34.0281	34.3448	27.7912	29.6661	26.002	35.6986	33.1812	36.2554	31.6652	35.145	28.6693	34.6446	37.929	37.7754	40.0162	37.1692	37.5561	35.0765	35.5607	34.4285	Function unknown	PREDICTED: splicing factor U2af large subunit A-like isoform X1 [Solanum tuberosum]
RHC12H2G0482.2.gene	3.32617	3.46598	3.77621	4.37749	3.62018	4.00612	4.32059	4.29502	3.6069	2.79694	4.8676	3.14789	4.72307	2.58621	3.85065	3.92774	2.94487	2.52724	2.87013	2.22606	3.00893	2.86011	3.81498	2.12354	Function unknown	PREDICTED: uncharacterized protein At2g40430-like [Solanum tuberosum]
RHC12H2G0481.2.gene	5.26407	8.72881	9.48666	15.0539	14.5753	12.5957	15.9737	13.2469	14.8797	12.4295	13.3564	9.16013	10.1648	10.4044	11.5183	14.053	14.7515	15.2694	10.9281	12.2286	13.1897	12.6078	10.0631	11.5255	--	PREDICTED: choline-phosphate cytidylyltransferase 1-like [Solanum tuberosum]
RHC12H2G0480.2.gene	3.81539	5.58052	4.3046	7.87363	8.27017	9.22048	2.70266	3.47389	3.87595	4.89324	5.57978	4.75444	2.66372	6.60601	2.91703	3.89846	3.65061	3.0078	7.21628	5.76524	6.05753	8.02271	5.77875	5.40395	Function unknown	PREDICTED: protein arginine N-methyltransferase 1.1-like [Solanum tuberosum]
RHC12H2G0479.2.gene	7.66681	7.96766	8.05878	7.87737	8.34885	8.01018	8.2432	8.93644	7.1669	7.58988	7.37229	6.97893	6.84815	7.46458	6.13185	8.61957	6.97897	7.2388	9.01852	6.49984	7.71613	7.58107	9.67932	8.80873	Function unknown	PREDICTED: graves disease carrier protein homolog [Solanum tuberosum]
RHC12H2G0478.2.gene	20.4004	18.9519	19.6095	21.7852	23.5808	20.3133	20.8118	22.0163	20.9995	27.7503	28.7297	30.9495	21.6271	27.7067	21.3129	21.2698	25.1664	22.8803	30.3523	23.1199	24.3994	29.0098	26.0001	24.7872	Amino acid transport and metabolism	PREDICTED: serine acetyltransferase 5 [Solanum tuberosum]
RHC12H2G0477.2.gene	3.74828	4.54736	4.47563	5.27992	6.58045	5.01698	4.47161	3.42115	2.91674	4.85058	4.78733	5.11835	3.50608	5.46225	2.91234	4.57704	4.39695	4.00631	5.03538	4.793	5.26725	5.42874	4.12892	5.44582	Cell wall/membrane/envelope biogenesis	PREDICTED: probable acyl-[acyl-carrier-protein]--UDP-N-acetylglucosamine O-acyltransferase, mitochondrial isoform X1 [Solanum tuberosum]
RHC12H2G0476.2.gene	13.47	14.7638	12.8953	13.6194	14.5434	12.658	22.4928	18.9241	18.0544	20.2893	21.6898	19.1022	11.7131	16.1179	13.3907	24.5968	14.3284	14.4902	14.1547	19.2073	17.5083	11.6154	15.0056	11.5115	Transcription	PREDICTED: transcription factor MYB1R1-like [Solanum tuberosum]
RHC12H2G0475.2.gene	25.9027	27.2608	23.8028	9.66007	11.1998	10.2493	15.9973	13.0965	13.4659	15.8084	17.0723	16.0237	5.04234	22.6088	5.00244	9.11486	9.08867	8.6162	19.0204	21.645	21.1857	8.02991	8.10671	6.68922	Function unknown	PREDICTED: uncharacterized protein At4g29660 [Solanum tuberosum]
RHC12H2G0474.2.gene	6.53439	4.1658	5.63112	3.38014	3.31427	3.28178	6.46052	6.91645	5.96289	12.0998	16.3498	11.3657	2.60588	19.8034	5.73229	5.03438	3.93778	6.55878	24.2284	22.2864	26.2345	3.6346	4.34603	6.06948	Carbohydrate transport and metabolism	PREDICTED: beta-galactosidase-like [Solanum tuberosum]
RHC12H2G0472.2.gene	12.0971	14.5767	17.5308	17.2029	15.5562	12.9549	11.3744	8.87641	10.9668	8.39957	13.2807	8.75185	10.6488	11.336	8.02813	12.9522	9.53962	11.1665	11.5023	10.9554	11.8199	13.1501	14.3574	14.6346	Function unknown	PREDICTED: zinc finger CCCH domain-containing protein 64 isoform X2 [Solanum tuberosum]
RHC12H2G0471.2.gene	1.58772	1.19992	2.10639	2.23097	2.39512	2.95685	1.29011	1.17876	0.73945	1.94279	1.5419	2.11893	0.713727	2.02696	1.3637	0.580005	0.447884	0.845556	1.61369	1.61506	1.81837	1.19332	2.82151	1.85164	Nucleotide transport and metabolism	PREDICTED: carbamoyl-phosphate synthase small chain, chloroplastic-like isoform X1 [Solanum tuberosum]
RHC12H2G0469.2.gene	13.4778	13.617	12.8776	9.43033	10.3326	9.23465	9.53017	9.15811	10.5191	9.63685	8.08356	9.14953	7.9074	8.06277	7.71877	10.0041	7.17521	8.33482	11.2071	9.30818	9.12969	9.50409	11.0253	10.119	Translation, ribosomal structure and biogenesis	PREDICTED: translation machinery-associated protein 22-like [Solanum tuberosum]
RHC12H2G0466.2.gene	21.5055	20.1442	23.0663	27.5855	32.3837	32.1278	21.5621	20.0314	23.9297	29.8687	28.5464	28.9745	20.7029	27.8026	21.4848	23.36	24.0865	25.1708	34.6166	30.3798	31.7469	24.2722	27.2439	25.7483	Function unknown	PREDICTED: nucleosome assembly protein 1;2 [Solanum tuberosum]
RHC12H2G0464.2.gene	5.13645	4.20069	4.93351	5.6233	6.41858	5.76827	6.0108	5.68044	4.9486	5.75186	5.1419	4.94765	10.394	7.06429	10.2541	5.24344	6.74509	7.69216	5.86811	6.1802	6.24492	6.73668	6.07385	5.61755	Lipid transport and metabolism	PREDICTED: diacylglycerol O-acyltransferase 1-like [Solanum tuberosum]
RHC12H2G0463.2.gene	44.7494	48.1738	52.4373	47.4198	51.4902	49.3543	74.5983	66.9336	62.0856	44.748	43.1097	39.1092	66.5544	44.7528	64.2856	67.2244	66.8302	68.1382	44.6827	40.6027	44.631	72.9882	66.5579	78.9716	Lipid transport and metabolism	TPA: lycopene epsilon cyclase [Solanum tuberosum]
RHC12H2G0460.2.gene	0.316807	0.181994	0.170313	0.579256	0.244896	0.12141	0.180836	0.116031	0.160518	0.272957	0.270643	0.223177	0.169405	0.136035	0.140402	0.668371	0.30727	0.198964	0.334537	0.178911	0.083486	0.170996	0.384436	0.19113	Signal transduction mechanisms	PREDICTED: serine/threonine-protein kinase 38-like [Solanum tuberosum]
RHC12H2G0459.2.gene	11.1779	8.71976	10.1222	10.9069	8.51558	9.90956	6.79829	6.794	6.63413	9.02609	9.84525	10.1509	7.54459	9.82915	8.4706	8.64927	9.09265	7.90077	9.82547	11.9189	11.1734	11.4366	10.0219	9.87353	Signal transduction mechanisms	PREDICTED: mitogen-activated protein kinase kinase 2-like [Solanum tuberosum]
RHC12H2G0458.2.gene	6.4132	7.88003	5.75789	4.37519	4.21648	4.15238	3.17584	3.42047	4.5845	2.78314	3.46668	3.30464	4.20438	4.80032	3.3768	3.89519	4.95414	4.03772	4.08472	5.34219	4.30194	5.41687	4.04008	4.91633	Function unknown	PREDICTED: WD repeat-containing protein VIP3-like [Solanum tuberosum]
RHC12H2G0457.2.gene	0.6162	0.556673	0.637412	0.899114	1.26869	1.17834	1.01707	0.829655	0.772565	0.926355	0.792801	1.05055	0.597586	0.959631	0.442835	1.00903	1.18848	0.979351	0.787712	0.763645	1.06593	0.945371	0.881911	0.814935	Lipid transport and metabolism	PREDICTED: long chain acyl-CoA synthetase 8-like [Solanum tuberosum]
RHC12H2G0456.2.gene	2.6395	2.70803	3.82828	3.3694	3.22317	4.0819	4.43051	2.44836	2.31274	2.52895	3.8004	4.7249	2.01074	2.31997	5.41324	2.64705	4.1885	2.28443	3.47994	2.94195	4.66494	4.98838	4.08153	4.78179	Transcription	PREDICTED: nuclear transcription factor Y subunit A-7-like [Solanum tuberosum]
RHC12H2G0455.2.gene	9.97787	10.6096	12.3402	11.0188	10.5899	10.1377	8.89335	10.4054	10.7675	7.14382	8.67254	10.0566	10.7092	9.10618	9.77135	8.55979	10.4333	9.13682	10.5401	9.51193	7.8352	10.9221	8.49042	9.28463	Cell motility	PREDICTED: vacuolar protein sorting-associated protein 2 homolog 1 [Solanum tuberosum]
RHC12H2G0453.2.gene	182.114	205.368	231.765	60.472	49.1395	49.6183	140.646	118.529	154.44	68.8224	94.8527	77.8465	123.492	60.6816	124.453	153.749	92.6225	100.882	61.8986	85.1675	78.7254	104.791	120.359	95.5279	Function unknown	PREDICTED: uncharacterized protein LOC102595674 [Solanum tuberosum]
RHC12H2G0452.2.gene	417.642	454.179	544.969	237.459	193.574	204.025	473.482	388.185	471.345	218.616	293.157	223.262	389.266	184.855	372.091	405.944	277.202	297.188	190.529	254.391	232.655	263.45	287.747	290.789	Function unknown	PREDICTED: uncharacterized protein LOC102596015 [Solanum tuberosum]
RHC12H2G0451.2.gene	198.425	223.078	259.701	71.5062	60.3748	57.6527	216.726	180.006	217.273	71.5318	110.574	74.7601	188.405	64.486	181.559	155.932	93.68	114.949	72.5315	92.0669	88.5567	77.2518	84.4566	81.1867	Function unknown	PREDICTED: uncharacterized protein LOC102596339 [Solanum tuberosum]
RHC12H2G0450.2.gene	15.1711	27.0828	20.5359	32.9486	25.2438	25.9529	5.071	17.6534	10.1257	25.9244	31.2129	32.2882	16.0168	28.8521	14.6229	21.7824	17.4381	22.2298	42.775	26.4647	24.3914	12.5417	27.8317	24.0121	Function unknown	PREDICTED: uncharacterized protein LOC102597756 [Solanum tuberosum]
RHC12H2G0447.2.gene	6.11017	1.67533	0.776663	5.28314	1.81186	7.10662	0.579171	1.4908	0.79092	0.58877	1.78813	2.42079	1.57785	1.13526	3.61869	6.2835	7.49859	1.65654	0.914645	6.45676	4.02977	4.5713	2.94054	6.33255	Posttranslational modification, protein turnover, chaperones	PREDICTED: RING-box protein 1a [Solanum lycopersicum]
RHC12H2G0442.2.gene	42.5623	40.0986	40.1268	49.1054	46.3343	46.8618	32.4187	31.8675	32.068	32.1909	34.6595	28.3843	30.2542	33.7756	25.7603	41.9936	41.0216	34.9616	39.9143	34.8923	34.6898	40.2809	50.2267	46.145	Function unknown	PREDICTED: uncharacterized protein LOC107005306 [Solanum pennellii]
RHC12H2G0440.2.gene	110.322	126.555	123.623	87.4135	84.9287	76.5597	129.706	116.319	131.507	63.8758	61.995	64.8872	99.1248	70.3079	95.2009	116.186	111.64	113.481	59.9473	68.6922	69.564	60.876	59.9956	59.4945	Function unknown	PREDICTED: chlorophyll a-b binding protein, chloroplastic [Solanum tuberosum]
RHC12H2G0439.2.gene	9.99323	10.7722	12.9118	7.56879	8.72244	9.38302	8.45432	9.29447	9.16424	7.46345	8.71756	10.1238	5.39894	9.51423	7.30946	8.88247	12.754	10.0302	11.7894	9.15232	9.9028	7.46679	10.9005	7.88203	Cell wall/membrane/envelope biogenesis	PREDICTED: probable polygalacturonase [Solanum tuberosum]
RHC12H2G0438.2.gene	4.18074	4.04746	4.07637	21.0813	24.6943	24.2987	4.81919	4.96293	4.48179	9.92459	10.3043	9.3582	6.44998	8.63607	8.12083	8.91568	8.89795	9.46107	7.3229	9.60691	9.5036	31.509	30.7403	29.5291	Function unknown	PREDICTED: protein TIFY 10A [Solanum tuberosum]
RHC12H2G0437.2.gene	24.475	23.6355	25.9048	53.6499	46.8245	51.6051	22.9733	23.3746	21.3157	42.1875	46.4111	38.1099	21.6159	38.9715	20.3439	32.1143	27.8541	28.8968	35.0452	39.7391	39.6761	35.8343	44.7205	41.4042	Function unknown	PREDICTED: oligouridylate-binding protein 1-like [Solanum tuberosum]
RHC12H2G0435.2.gene	0.583717	0.802144	5.8506	2.88096	0.612944	0.330048	3.11842	2.25567	0	0	0	0	0.996597	3.20805	0.243209	2.2971	1.31426	0	2.7731	0	1.19919	3.6851	3.02965	0.264047	Posttranslational modification, protein turnover, chaperones	PREDICTED: 20 kDa chaperonin, chloroplastic-like [Solanum tuberosum]
RHC12H2G0434.2.gene	1.52201	1.19338	2.55518	19.122	21.5899	20.5535	1367.38	1404.16	1506.4	616.128	631.484	791.461	1027.26	516.165	1120.12	539.257	598.687	569.479	653.636	586.395	554.282	33.6734	30.1771	29.5065	Posttranslational modification, protein turnover, chaperones	PREDICTED: 18.2 kDa class I heat shock protein-like [Solanum tuberosum]
RHC12H2G0433.2.gene	1.08657	0.566832	1.15924	0.58272	1.03935	1.26721	0.844425	1.12401	0.634443	0	0	0.363945	0.557462	0.493071	0.373221	0.764602	0.35273	1.36847	0.22839	0.923511	0.521055	0.536899	0.789126	0.530333	Lipid transport and metabolism	PREDICTED: 3-oxoacyl-[acyl-carrier-protein] synthase II, chloroplastic-like [Solanum tuberosum]
RHC12H2G0432.2.gene	1.7528	2.55108	1.95422	3.37608	3.57418	4.10506	0.909218	1.86142	1.82205	1.83331	1.40716	1.45384	0.081583	1.24389	0.274311	5.52709	2.78101	3.55089	1.76668	1.81362	1.05828	4.97707	5.69758	4.53293	--	PREDICTED: 21 kDa protein-like [Solanum tuberosum]
RHC12H2G0431.2.gene	6.62771	5.34338	7.01581	6.74388	8.61823	8.01323	4.68576	5.45149	4.92416	4.051	2.83372	1.88061	0.78452	4.85823	5.24961	5.78083	3.38708	7.33953	2.77685	4.56879	5.27618	4.70658	6.57372	7.31759	Posttranslational modification, protein turnover, chaperones	PREDICTED: 20 kDa chaperonin, chloroplastic-like [Solanum tuberosum]
RHC12H2G0428.2.gene	0.784221	0.352787	0.616967	0.005902	0.174726	0.57154	0.544829	0.533517	0.177916	0.020094	0.460858	1.36745	0	0.153653	0	1.04662	0.609833	0.007256	0.671646	0.288536	0.290698	1.50353	0.479596	0.425814	--	PREDICTED: 21 kDa protein-like [Solanum tuberosum]
RHC12H2G0424.2.gene	0.75317	0.79767	1.02029	2.19682	2.09811	2.2353	0.540845	1.00898	0.869633	1.38605	1.47784	0.96692	0.930489	2.92669	0.641529	0.925708	1.98045	1.59127	4.06921	2.47377	1.8018	2.50857	1.61526	2.08397	Cell wall/membrane/envelope biogenesis	PREDICTED: sucrose synthase isoform X1 [Solanum tuberosum]
RHC12H2G0423.2.gene	5.76684	7.59931	6.38363	18.07	18.0503	15.9375	11.5945	13.0401	10.9793	8.02168	8.26109	7.4977	12.7731	7.6164	11.1041	14.8045	13.4893	14.2302	8.50658	7.99017	7.98672	17.1168	16.4617	16.3725	Signal transduction mechanisms	PREDICTED: serine/threonine-protein kinase At5g01020-like isoform X1 [Solanum tuberosum]
RHC12H2G0422.2.gene	2.18255	2.57595	4.5415	10.1418	3.79403	6.68924	3.57993	4.14688	3.10269	6.29878	4.57684	4.12528	1.27083	2.96258	3.6236	2.96215	6.63013	3.98026	3.83288	6.46232	4.03072	6.92629	4.10908	5.83325	Signal transduction mechanisms	PREDICTED: serine/threonine-protein kinase HT1-like [Solanum tuberosum]
RHC12H2G0421.2.gene	0.661517	1.73215	0.314197	1.15514	0.140858	0.898313	0.603059	0.458943	0.195987	1.32679	0	0.376704	0	0.12884	0	0	0.852575	0.776903	1.31336	0.306008	0.677459	0	0.643675	0.744047	Translation, ribosomal structure and biogenesis	--
RHC12H2G0420.2.gene	1.03644	1.26564	1.40078	1.25269	1.61793	0.945239	0.859423	1.01836	1.29256	1.55519	1.63238	1.32783	0.684821	1.22873	0.757354	0.976911	1.0461	1.34836	1.16514	1.32545	1.62652	1.22028	1.78087	1.05372	Signal transduction mechanisms	PREDICTED: serine/threonine-protein kinase HT1-like [Solanum tuberosum]
RHC12H2G0419.2.gene	2.36149	3.11048	2.31577	2.70332	2.35165	1.03394	0.924382	1.42219	2.62572	2.48967	1.69607	2.10845	0.835425	3.80182	0.736872	3.10895	3.50479	1.7994	1.97941	2.16295	2.67266	3.64637	3.92374	2.72027	Translation, ribosomal structure and biogenesis	PREDICTED: 30S ribosomal protein S17-like isoform X2 [Solanum tuberosum]
RHC12H2G0418.2.gene	1.09494	1.16644	1.36187	1.31793	1.42991	1.12522	1.04568	0.758721	1.46907	1.87926	1.59608	1.73599	0.707091	1.88267	0.661163	1.17388	1.17658	1.69228	1.30621	2.45432	2.15307	2.37264	2.01143	2.39819	Signal transduction mechanisms	PREDICTED: serine/threonine-protein kinase HT1-like [Solanum tuberosum]
RHC12H2G0417.2.gene	1.40049	1.1969	1.7899	3.52162	2.87507	2.1638	2.15867	1.10513	1.89214	1.99099	2.21591	2.18797	0.880083	1.98439	0.998529	2.47202	1.02751	1.74387	2.12104	2.7698	1.97462	2.52882	2.74336	2.13933	Signal transduction mechanisms	PREDICTED: serine/threonine-protein kinase HT1-like isoform X1 [Solanum tuberosum]
RHC12H2G0416.2.gene	17.2354	20.4718	24.4914	14.3044	14.6295	15.0684	10.7484	11.3647	9.72967	10.9942	11.5871	11.4623	10.0466	15.0754	9.26652	13.8499	12.3388	12.0418	11.7941	12.4261	17.4248	12.0902	17.327	14.8943	Translation, ribosomal structure and biogenesis	PREDICTED: 30S ribosomal protein S17-like isoform X1 [Solanum tuberosum]
RHC12H2G0415.2.gene	5.13038	5.16478	4.93632	7.35061	6.59626	6.25061	4.56954	5.62898	4.19666	6.52019	7.15764	6.79472	3.77136	7.65106	3.78256	6.74908	6.80724	6.81413	8.21434	7.10741	6.23268	7.65532	7.38838	8.31897	Function unknown	PREDICTED: zinc finger CCCH domain-containing protein 16 [Solanum tuberosum]
RHC12H2G0414.2.gene	15.1457	14.6707	14.8125	8.13976	10.4276	10.7321	6.5229	8.50473	9.33782	6.20788	5.47246	5.91842	7.07554	6.75033	7.65368	8.118	8.45532	8.49377	6.2365	7.58282	6.05635	8.17645	7.43001	8.01947	Energy production and conversion	PREDICTED: pyruvate dehydrogenase E1 component subunit alpha-3, chloroplastic-like [Solanum tuberosum]
RHC12H2G0413.2.gene	1.19372	1.13619	1.52637	1.07682	1.35014	1.1778	0.794217	0.951839	0.332116	1.23212	0.775447	1.20724	0.369168	1.30456	0.619168	0.671094	0.488188	0.808609	1.55691	1.09953	1.22802	0.87264	1.09294	0.9171	Function unknown	PREDICTED: putative late blight resistance protein homolog R1A-10 [Solanum tuberosum]
RHC12H2G0411.2.gene	64.7362	65.0372	64.4396	86.1242	90.076	87.8339	65.9614	57.305	66.353	32.4702	37.4974	39.6939	46.4819	35.7898	49.5917	76.8273	61.2182	65.9652	36.2524	37.8797	38.2874	96.1474	101.736	93.7423	Secondary metabolites biosynthesis, transport and catabolism	PREDICTED: uncharacterized protein LOC102600666 [Solanum tuberosum]
RHC12H2G0408.2.gene	57.2435	58.696	58.572	42.5774	38.1422	39.7884	57.0711	58.9861	63.5452	55.9859	52.1123	65.2055	45.6545	72.2597	48.7504	56.9707	53.5898	60.2782	66.7783	76.8832	75.3093	45.596	53.4106	44.1397	Inorganic ion transport and metabolism	PREDICTED: heme oxygenase 1, chloroplastic [Solanum tuberosum]
RHC12H2G0407.2.gene	9.31164	8.54913	9.90229	6.28272	7.07369	7.41177	1.82386	1.92968	1.92386	5.20577	5.3606	4.35362	1.81557	5.60737	2.2238	3.8753	3.08995	3.67063	4.5197	5.66826	5.06892	7.45505	6.66487	6.33512	Signal transduction mechanisms	PREDICTED: SPX domain-containing protein 1 [Solanum tuberosum]
RHC12H2G0406.2.gene	3.87046	2.54717	2.29496	4.72251	3.23488	2.4492	2.22137	1.13976	2.04268	1.3476	3.0846	1.2832	0.738996	1.26049	1.11153	2.86144	1.50692	0.722029	0.940359	1.83706	1.51801	1.82981	2.22755	2.02269	Transcription	PREDICTED: ethylene-responsive transcription factor WIN1-like [Solanum tuberosum]
RHC12H2G0405.2.gene	6.01287	7.29538	7.18943	9.23907	7.69697	7.55287	8.36777	7.59727	7.70635	10.3246	8.48224	8.78283	7.7387	9.68934	7.65161	8.68918	7.11102	8.0747	7.88586	9.78903	9.32917	6.92444	10.1488	7.02254	Transcription	PREDICTED: elongator complex protein 6 [Solanum tuberosum]
RHC12H2G0402.2.gene	0.480403	0.439064	0.366365	0.613695	0.482953	0.535729	0.52492	0.540804	0.450511	0.55279	0.512589	0.570976	0.139847	0.72975	0.20993	0.483426	1.2199	1.54765	0.629807	0.590383	0.706235	1.49424	1.61701	1.55889	Function unknown	PREDICTED: receptor-like protein 12 [Solanum tuberosum]
RHC12H2G0400.2.gene	14.375	14.4206	14.5505	19.6362	21.3386	19.1595	22.6582	26.6303	20.4514	19.4587	17.3312	16.7793	19.0757	13.0408	18.6766	16.0223	21.7712	17.9655	13.5789	12.2859	11.9532	24.0435	22.0056	22.9013	Function unknown	PREDICTED: EIN3-binding F-box protein 1-like [Solanum tuberosum]
RHC12H2G0399.2.gene	9.0972	10.3892	11.2145	10.2387	10.8364	7.21255	11.6575	10.9588	11.3546	9.13586	11.2679	7.58853	6.39933	10.3299	6.80965	12.8201	11.5578	13.2512	8.51263	8.93229	9.41454	10.5902	12.9974	9.44393	Signal transduction mechanisms	PREDICTED: CBL-interacting serine/threonine-protein kinase 24 [Solanum tuberosum]
RHC12H2G0398.2.gene	10.8752	11.1163	11.2626	11.2406	13.6406	13.4029	15.0596	14.8414	14.7776	12.8522	11.1997	13.3401	16.0191	11.3151	15.8456	10.8377	11.6709	12.6941	11.3622	11.5664	11.7719	11.6076	9.34597	11.9349	Function unknown	PREDICTED: methyl-CpG-binding domain-containing protein 11-like [Solanum tuberosum]
RHC12H2G0397.2.gene	87.4941	91.2725	88.0012	50.0431	53.3606	51.4755	95.1246	86.3335	93.7632	42.3231	41.0019	39.9314	65.8949	46.5328	59.3889	63.592	55.512	54.416	48.9366	46.4722	51.3014	44.0142	45.9194	47.2337	Function unknown	PREDICTED: TBC1 domain family member 17-like [Solanum tuberosum]
RHC12H2G0396.2.gene	11.42	11.4835	13.4708	12.0058	10.9089	9.3241	11.8961	10.6157	10.0891	9.22753	10.2309	10.7465	6.7967	10.4471	7.78626	12.4156	13.0694	14.8554	8.65933	10.3161	8.94217	12.7623	11.1027	9.21819	Function unknown	PREDICTED: uncharacterized protein LOC102595974 [Solanum tuberosum]
RHC12H2G0395.2.gene	8.90169	11.2915	9.59539	7.78673	7.99075	6.81292	6.85988	5.71204	4.44267	6.286	5.83732	6.76797	2.18565	8.17125	2.70949	6.35208	6.4178	7.56623	9.20638	7.97924	7.20245	6.67132	5.62744	7.7107	--	PREDICTED: calmodulin-like protein 3 [Solanum tuberosum]
RHC12H2G0394.2.gene	14.1557	14.4064	12.2194	12.2171	13.1502	11.9727	9.73153	9.88704	9.46087	12.2816	9.90036	12.0954	7.49394	11.9835	8.2223	8.09378	9.92077	9.70814	11.7828	12.2588	11.6097	10.3456	9.59139	9.66723	Function unknown	PREDICTED: zinc finger BED domain-containing protein DAYSLEEPER-like [Solanum tuberosum]
RHC12H2G0393.2.gene	1278.56	1309.15	1562.29	94.6251	95.8084	111.791	837.185	712.027	1057.95	389.179	346.659	529.61	659.617	446.576	735.027	439.463	412.51	421.134	520.784	479.542	463.584	146.162	103.524	107.961	Function unknown	proline-rich protein precursor [Solanum lycopersicum]
RHC12H2G0392.2.gene	0.805327	1.00999	0.979469	1.82891	1.99538	2.00689	1.35187	1.06002	1.06674	1.02478	1.4051	1.3607	0.607632	0.715746	0.798265	2.37804	1.71036	1.15134	0.987108	0.949393	1.1256	1.64297	2.18874	2.02251	Function unknown	Hly-III-related protein [Corchorus olitorius]
RHC12H2G0390.2.gene	5.03528	4.56513	4.18771	4.99368	5.19548	3.90337	2.97906	4.64018	4.12826	3.43303	3.26234	4.09486	2.42208	4.79303	2.8396	5.33814	3.28624	4.62195	4.44965	0.728049	5.40208	4.44651	6.1125	4.68895	Function unknown	PREDICTED: synaptotagmin-5-like [Solanum pennellii]
RHC12H2G0389.2.gene	1.21195	1.7612	1.24313	1.42257	1.55958	1.97153	0.539084	0.878347	0.380849	0.813639	0.839209	0.303189	0.731636	0.55736	0.631077	0.905291	0.786521	1.1224	1.14468	0.239165	0.31495	1.3533	1.81069	1.51024	Function unknown	PREDICTED: bifunctional purple acid phosphatase 26-like [Solanum tuberosum]
RHC12H2G0388.2.gene	8.08028	9.76232	9.00584	8.36487	7.72492	7.43674	10.0239	8.79851	8.58419	6.36725	10.3846	6.78344	6.77863	8.02531	5.16971	13.601	9.21317	10.2114	8.89316	9.03747	7.96122	11.3704	10.7105	10.9905	Function unknown	PREDICTED: UDP-N-acetylglucosamine transferase subunit alg13-like [Solanum tuberosum]
RHC12H2G0387.2.gene	7.42158	7.26809	6.20493	6.69728	7.32435	7.53905	9.4411	7.92881	6.95106	5.85079	6.23271	7.3951	5.1749	6.40246	4.90863	7.88662	9.11809	7.95291	6.37112	5.45854	5.59944	8.31445	6.82534	6.93001	Cell wall/membrane/envelope biogenesis	PREDICTED: monogalactosyldiacylglycerol synthase 2, chloroplastic-like [Solanum tuberosum]
RHC12H2G0386.2.gene	1.43865	2.52971	2.01729	3.61442	3.31212	2.54268	3.37789	3.68462	2.82092	3.75817	3.41394	2.97414	3.56481	2.91948	3.69785	4.11027	2.75651	3.87413	2.77778	3.52263	3.28456	3.90956	4.11015	3.33873	Function unknown	PREDICTED: uncharacterized protein LOC102600365 isoform X1 [Solanum tuberosum]
RHC12H2G0385.2.gene	2.88735	3.07251	2.46465	3.12591	3.51779	3.54993	3.01131	3.84101	3.27628	2.37528	2.01633	1.88899	2.06678	3.49295	1.89067	3.77504	4.31901	4.71371	2.76881	3.37303	3.08971	3.65866	3.46411	3.45465	Energy production and conversion	PREDICTED: pyrophosphate-energized vacuolar membrane proton pump [Solanum tuberosum]
RHC12H2G0384.2.gene	11.9429	13.0029	12.9364	11.0438	12.2436	9.9629	11.3538	10.6109	10.8428	8.30623	7.62191	8.47599	10.8499	8.80776	9.58334	7.98369	9.41176	8.83792	10.4773	10.1809	9.38369	9.04558	8.21555	9.58522	Function unknown	PREDICTED: prostatic spermine-binding protein-like [Solanum tuberosum]
RHC12H2G0380.2.gene	6.01147	5.62641	6.86434	7.10893	5.84011	6.1794	7.63867	8.35146	8.1024	5.55192	5.8296	5.54095	5.81133	5.99983	5.57993	6.016	6.12694	6.00931	6.28527	7.30002	7.13084	5.96572	5.7222	5.97366	Energy production and conversion	PREDICTED: V-type proton ATPase subunit H-like [Solanum tuberosum]
RHC12H2G0375.2.gene	1.79746	1.61343	2.02773	2.53939	3.55947	3.56513	1.79416	1.66278	1.78504	2.05612	1.55573	2.73542	0.699259	2.1488	0.917105	1.5884	2.40378	2.09196	2.36554	2.04017	2.00529	3.96278	3.14375	2.23277	Function unknown	PREDICTED: zeatin O-glucosyltransferase-like [Solanum tuberosum]
RHC12H2G0373.2.gene	18.2074	16.4625	17.9219	21.7974	25.1241	34.8168	28.5821	20.4662	19.8106	24.3991	20.8508	34.2511	23.1411	27.8184	15.23	37.2178	26.3595	28.326	25.4364	24.4129	21.8417	25.4833	25.878	33.3767	Translation, ribosomal structure and biogenesis	PREDICTED: eukaryotic translation initiation factor isoform 4G-1-like isoform X1 [Solanum tuberosum]
RHC12H2G0372.2.gene	6.92002	5.18787	5.61747	10.5968	11.1818	9.12972	9.14337	8.85002	9.03941	10.5507	12.8836	10.051	5.3758	9.48421	7.6993	9.14096	8.00771	7.05403	10.7548	7.79989	9.61694	9.81139	9.01043	8.70094	Function unknown	PREDICTED: uncharacterized protein LOC102597642 isoform X1 [Solanum tuberosum]
RHC12H2G0371.2.gene	13.6644	9.77343	15.6749	19.842	18.3084	19.7086	10.8676	15.9207	12.9516	11.5034	15.077	8.48693	7.68836	4.77306	7.31912	15.3427	19.1052	22.4125	13.5292	12.4087	8.28791	26.7818	20.4619	27.3427	Intracellular trafficking, secretion, and vesicular transport	PREDICTED: signal recognition particle receptor subunit alpha [Solanum tuberosum]
RHC12H2G0369.2.gene	4.15482	4.41568	3.80662	0	7.75473	7.62094	3.75133	3.10028	3.2942	0	4.61836	0	2.34466	5.67032	2.04844	7.50041	7.39386	7.21371	5.1461	5.67764	0	0	9.04993	9.72242	Intracellular trafficking, secretion, and vesicular transport	PREDICTED: probable cyclic nucleotide-gated ion channel 5 [Solanum tuberosum]
RHC12H2G0368.2.gene	48.1514	54.8012	47.7057	3660.59	3812.55	3831.92	23.2809	25.574	22.7305	1113.44	984.956	1236.94	32.55	281.713	58.4305	107.272	87.967	100.597	291.547	357.543	320.935	1713.04	1629.07	1764.51	Amino acid transport and metabolism	leucine aminopeptidase, chloroplastic precursor [Solanum tuberosum]
RHC12H2G0367.2.gene	32.1057	29.0352	26.8473	28.0096	29.9557	31.6333	26.8447	30.034	29.3593	26.5726	23.9083	26.8057	23.2724	28.569	24.2733	28.0243	35.3158	31.6244	29.5612	26.8208	26.739	32.896	31.9278	32.8453	Amino acid transport and metabolism	PREDICTED: leucine aminopeptidase 2, chloroplastic isoform X1 [Solanum tuberosum]
RHC12H2G0366.2.gene	1.63436	1.83361	2.05144	4.26939	2.72639	4.91506	2.64665	4.88896	3.10712	2.5817	2.63918	4.41502	2.03585	2.08946	1.56745	2.51764	3.77265	3.54051	4.68506	2.57921	3.76279	2.55294	2.71461	4.18186	Replication, recombination and repair	PREDICTED: probable GMP synthase [glutamine-hydrolyzing] isoform X1 [Solanum tuberosum]
RHC12H2G0365.2.gene	200.982	202.313	232.505	132.006	154.958	133.773	198.959	193.97	193.472	171.965	199.303	174.104	180.848	177.885	178.931	216.114	194.859	213.293	186.345	202.723	196.816	176.423	190.6	190.773	Translation, ribosomal structure and biogenesis	eukaryotic translation initiation factor 5A-1/2 [Solanum tuberosum]
RHC12H2G0357.2.gene	1.27397	1.11436	0.997703	1.58133	1.2894	1.23495	0.900694	0.966566	0.902215	1.03673	0.924349	0.973423	0.538851	0.811255	0.451014	1.41391	0.974474	0.966013	1.2261	1.0025	0.974778	1.50866	1.31687	1.50413	Function unknown	PREDICTED: formin-like protein 13 isoform X1 [Solanum tuberosum]
RHC12H2G0356.2.gene	0.956855	0.661862	0.664569	1.20087	0.789496	1.06168	1.01488	0.484791	0.667426	0.632885	0.40287	0.818632	0.485755	0.559767	0.346318	0.997021	0.411358	0.656803	0.726441	0.621164	0.766331	0.984181	0.599931	0.948414	Function unknown	PREDICTED: reticulon-like protein B21 [Solanum pennellii]
RHC12H2G0355.2.gene	23.4164	25.4111	25.1717	16.769	15.3789	16.0356	10.232	8.76143	9.79374	10.9396	10.7088	11.3743	7.52847	12.8672	7.44749	10.7146	10.5555	10.8801	13.778	13.4676	12.0808	11.4547	12.0001	12.4351	Signal transduction mechanisms	PREDICTED: CBL-interacting serine/threonine-protein kinase 6 [Solanum tuberosum]
RHC12H2G0354.2.gene	3.77679	3.66269	4.25508	8.61754	11.2314	12.5323	4.17218	4.15423	2.57446	7.76046	4.92973	6.60675	2.53531	7.27453	3.07887	5.55161	5.33505	5.75725	5.36626	6.78873	4.84721	10.2732	8.67171	10.2358	--	--
RHC12H2G0353.2.gene	18.4925	18.0678	20.909	13.2446	14.7927	13.7573	8.79002	8.36285	8.36262	8.0218	8.49546	9.92794	6.80209	10.1216	5.91113	9.41754	9.3773	10.5067	11.9197	10.3041	11.4729	10.2091	12.8254	11.4524	Signal transduction mechanisms	PREDICTED: CBL-interacting serine/threonine-protein kinase 6 [Solanum tuberosum]
RHC12H2G0352.2.gene	0.894413	0.755893	0	0	0.375901	1.09509	0	0.709303	0.631868	0	0.157119	0.567429	0	0.995779	0	0	0	0.607059	0.199259	0	0.842208	0	0.522026	0.730721	Function unknown	PREDICTED: uncharacterized protein LOC102591353 [Solanum tuberosum]
RHC12H2G0351.2.gene	0.540215	0	0.084353	0	0	0.1855	0	0	0	0.104621	0.042818	0	0	0	0	0	0	0	0	0.08207	0	0.04673	0	0.111769	Transcription	PREDICTED: transcription factor bHLH66 [Solanum tuberosum]
RHC12H2G0350.2.gene	3.14042	2.78415	3.54446	4.29254	4.15721	6.18573	4.00659	3.66654	4.71033	3.39216	4.66927	3.75596	2.51093	4.24883	3.28809	4.99779	4.65823	5.05098	5.16055	5.38802	4.48077	4.60963	4.85053	5.15965	Amino acid transport and metabolism	PREDICTED: anthranilate synthase beta subunit 2, chloroplastic-like [Solanum tuberosum]
RHC12H2G0349.2.gene	0.760117	0.487852	0.55435	0.757674	0.513765	0.468313	1.01217	0.702798	0.678253	0.753951	0.391478	0.352944	0.557313	0.558965	0.278448	0.294239	1.27474	1.87757	1.20395	0.653955	0.677523	1.18386	1.05097	0.348481	Cell wall/membrane/envelope biogenesis	PREDICTED: probable galacturonosyltransferase 6 [Solanum tuberosum]
RHC12H2G0347.2.gene	0.771148	0.876672	0.742573	0.754064	1.45872	1.43809	1.20478	0.580092	0.755724	0.993787	1.17587	1.12392	0.406198	0.725586	1.08544	0.867739	1.20142	1.21692	1.12632	1.49294	1.03446	0.962931	1.09828	1.14217	Posttranslational modification, protein turnover, chaperones	PREDICTED: ABC transporter I family member 1 [Solanum tuberosum]
RHC12H2G0346.2.gene	3.59307	2.65988	3.34781	1.18226	0.85881	0.655128	0.933906	1.28346	1.9146	2.05136	2.37805	1.87348	0.917488	1.59289	0.774762	1.64025	1.56092	1.25057	1.04543	1.94866	1.80704	1.2651	0.995638	1.59971	Function unknown	PREDICTED: uncharacterized protein LOC101246218 [Solanum lycopersicum]
RHC12H2G0345.2.gene	21.6317	19.2464	20.4846	13.2342	10.8605	11.582	13.7429	12.5284	13.9734	17.4612	19.5281	17.6958	11.2505	20.2823	10.9628	10.8342	10.9847	9.82599	22.5809	20.1468	19.174	10.8071	9.4557	10.0466	Cell wall/membrane/envelope biogenesis	temperature-induced lipocalin [Solanum tuberosum]
RHC12H2G0344.2.gene	14.2334	14.7658	12.9584	8.44335	9.73333	9.88036	11.834	13.0974	13.2582	16.2309	15.2981	17.4889	8.30059	16.1843	6.9263	9.35437	8.7941	9.07117	17.5544	18.0793	18.5058	7.74254	7.10484	7.91409	Transcription	PREDICTED: two-component response regulator ORR24-like [Solanum tuberosum]
RHC12H2G0343.2.gene	79.4603	78.7211	101.433	91.214	69.3381	76.2234	75.1158	63.5194	69.6474	50.552	81.383	53.9027	70.5469	56.1201	61.7132	71.4392	40.2607	46.0356	67.2215	77.4844	71.6358	58.1391	80.6316	57.7573	RNA processing and modification	ATPase 9, plasma membrane-type [Capsicum baccatum]
RHC12H2G0341.2.gene	51.1393	48.4685	44.0729	21.5458	19.0873	20.2555	40.0473	41.1367	41.5882	23.6805	24.9722	25.2644	36.6075	23.1575	40.9505	30.6448	30.1865	30.9878	20.4439	25.1345	26.9642	22.2687	23.1274	23.9054	Nucleotide transport and metabolism	PREDICTED: adenylate kinase 5, chloroplastic isoform X1 [Solanum tuberosum]
RHC12H2G0340.2.gene	42.7796	44.0373	42.4673	29.5013	30.7251	31.7393	30.6427	31.8619	29.7841	27.5921	25.017	26.5899	25.6148	33.1488	25.5882	28.3599	33.3735	32.0259	33.8526	30.0589	28.7519	30.1538	28.9978	30.964	Function unknown	PREDICTED: transmembrane 9 superfamily member 11-like [Solanum tuberosum]
RHC12H2G0339.2.gene	21.8538	18.3304	23.7516	16.4944	15.526	19.5306	9.8984	12.9164	12.7556	14.6589	19.8046	15.7669	17.0076	15.3044	13.7581	14.0113	13.8473	14.4974	15.2832	15.3146	18.2907	18.9198	15.0527	18.6475	Function unknown	PREDICTED: uncharacterized protein LOC107061101 isoform X1 [Solanum tuberosum]
RHC12H2G0338.2.gene	0.549336	0.651056	0.98061	0.67446	0.852705	1.33897	0.441202	0.35665	0.044941	1.24889	1.18422	1.29559	0.613427	1.67471	0.61603	0.366885	0.746247	1.03601	2.07985	2.06019	1.81307	1.30341	1.69745	2.15194	Transcription	PREDICTED: homeobox protein knotted-1-like LET12 isoform X1 [Solanum tuberosum]
RHC12H2G0337.2.gene	1.97241	1.44167	1.09564	1.73573	1.91882	1.17064	3.61707	3.78466	3.28927	2.07212	3.07885	2.18249	2.65562	2.59219	3.3141	2.06511	1.5956	1.01244	3.59678	1.76425	2.63954	2.03794	2.81475	1.05813	--	PREDICTED: uncharacterized protein LOC107061083 [Solanum tuberosum]
RHC12H2G0336.2.gene	6.60475	6.0855	8.13452	9.3297	7.87383	8.39724	6.80995	7.67067	9.00409	8.19413	9.14195	6.38847	4.88977	6.19096	3.1051	8.08694	6.24936	6.78361	11.5317	8.43703	7.35146	10.8367	10.0036	9.52334	Function unknown	PREDICTED: uncharacterized protein LOC102584514 [Solanum tuberosum]
RHC12H2G0335.2.gene	3.06222	2.3295	3.20395	2.57913	3.22183	2.33215	2.14224	1.91021	1.38596	1.70175	1.78676	2.22484	1.66879	1.87746	1.43696	2.01132	2.17919	2.09856	1.55679	1.98097	1.77558	2.62658	2.39492	2.57616	Carbohydrate transport and metabolism	PREDICTED: putative glycerol-3-phosphate transporter 5 [Solanum tuberosum]
RHC12H2G0334.2.gene	12.213	10.7984	12.6402	22.6474	22.5685	21.6645	9.52935	11.2921	8.74673	17.0776	17.9086	16.629	33.4031	11.986	31.3856	13.6752	14.53	12.7679	14.0947	12.5825	13.0233	19.8007	19.591	19.2748	Signal transduction mechanisms	PREDICTED: probable protein phosphatase 2C 27 [Solanum tuberosum]
RHC12H2G0332.2.gene	1.50008	1.13403	0.946221	1.36308	2.26103	2.03174	0.818903	0.966881	1.28074	1.40422	1.42993	1.8194	0.550117	1.56848	0.796902	0.924859	1.20646	1.01079	1.53179	1.57618	1.66479	2.70349	1.97446	1.48535	Function unknown	PREDICTED: heptahelical transmembrane protein 2-like [Solanum tuberosum]
RHC12H2G0328.2.gene	15.7867	15.0792	13.9218	11.2991	13.1192	11.3232	7.63286	8.50402	7.3463	9.03842	9.35588	9.3742	6.08811	10.0508	5.62005	9.39346	9.11115	9.29584	9.78868	9.53597	10.7153	11.4387	11.9434	10.036	Translation, ribosomal structure and biogenesis	PREDICTED: eukaryotic peptide chain release factor subunit 1-3 [Solanum tuberosum]
RHC12H2G0326.2.gene	8.7984	7.75633	8.82224	5.38603	4.96018	5.59221	5.81709	6.8255	6.14661	5.53659	6.97659	5.12426	9.0773	6.18284	9.07298	4.18394	4.90829	6.00253	8.9913	6.24171	7.45114	2.26091	4.98601	4.56405	Cell wall/membrane/envelope biogenesis	PREDICTED: UDP-glucuronate 4-epimerase 1-like [Solanum tuberosum]
RHC12H2G0325.2.gene	10.7991	9.60553	14.9039	2.95848	3.94601	3.00311	11.2768	8.8312	11.4112	8.82144	7.6828	11.0908	9.93056	7.25451	11.6034	6.09588	7.78649	6.56886	10.2581	8.53639	8.76914	9.39852	7.33808	8.65917	Function unknown	PREDICTED: GDSL esterase/lipase At2g31550-like [Solanum pennellii]
RHC12H2G0324.2.gene	0.482256	0.56457	0.599777	3.73279	3.30527	3.04977	0.519322	0.609437	0.582752	1.45	1.86861	1.68165	0.349301	1.34703	0.480014	2.3381	1.31675	1.47214	1.1262	1.67174	1.32949	2.80114	4.18191	3.2783	Function unknown	PREDICTED: protein ECERIFERUM 3-like [Solanum tuberosum]
RHC12H2G0322.2.gene	7.10653	7.05709	6.01672	2.39619	2.0614	2.63627	3.87463	3.60721	3.16907	2.61438	3.56241	2.73638	1.61709	2.25605	0.769713	2.68356	2.1064	2.43567	2.35007	2.3696	3.06313	1.86726	2.04415	2.2439	Function unknown	PREDICTED: O-acyltransferase WSD1-like [Solanum tuberosum]
RHC12H2G0318.2.gene	1.36629	0.942996	0.609993	4.51056	4.37854	3.39259	1.04959	1.04709	1.2185	0.878099	1.32412	0.990694	0.540008	1.28317	0.900449	2.59054	2.43459	2.07625	0.509157	0.769093	0.241624	5.42646	4.84358	5.48923	Function unknown	PREDICTED: receptor-like protein 12 [Solanum tuberosum]
RHC12H2G0317.2.gene	0.655488	0.522067	0.683969	1.96417	2.59665	2.12124	0.780856	0.646426	0.28242	0.656605	0.773555	0.419302	0.364879	0.465253	0.396513	1.49142	1.33656	1.49014	0.381309	0.363503	0.385365	2.79767	2.61256	3.98714	Function unknown	PREDICTED: probable LRR receptor-like serine/threonine-protein kinase At4g36180 [Solanum tuberosum]
RHC12H2G0316.2.gene	6.68888	7.18724	6.63157	3.918	3.17363	4.20348	4.20763	3.58046	4.40947	4.53318	4.97417	4.92025	3.77694	5.43093	3.74973	4.20692	3.65462	4.1884	5.24201	6.38642	5.52691	4.55297	4.59552	3.84537	Function unknown	PREDICTED: uncharacterized protein LOC102580864 [Solanum tuberosum]
RHC12H2G0315.2.gene	2.00887	2.30061	2.66431	3.04539	2.08235	3.49248	1.63786	1.72244	1.43901	2.14854	1.96133	2.39013	1.71366	2.17293	1.38806	2.92136	1.69775	1.97334	3.00709	2.127	2.74907	2.24922	3.29976	3.19376	Function unknown	PREDICTED: uncharacterized protein LOC102580515 isoform X1 [Solanum tuberosum]
RHC12H2G0311.2.gene	1.62283	1.28629	1.63822	3.5558	3.87527	2.9019	1.87089	2.57206	1.46579	3.18521	2.47982	3.40407	1.48426	3.21158	1.83039	3.12032	2.5596	2.52062	2.87988	2.76283	2.96134	2.63517	2.39925	3.09368	Function unknown	disease resistance protein RGH6 [Solanum chacoense]
RHC12H2G0310.2.gene	0.477332	0.831885	0.370615	0	0.648876	0	0.703017	0	0.888083	1.54168	1.04134	0.95443	0.633835	0.36357	0	1.18078	0.341691	0	0.517347	0.398979	0	0.397939	1.11436	0.133092	Function unknown	PREDICTED: putative late blight resistance protein homolog R1C-3 [Solanum tuberosum]
RHC12H2G0307.2.gene	2.88883	2.69585	2.58891	3.8866	4.24758	3.18867	2.42808	2.70209	2.1465	3.02321	4.64356	4.1492	2.15561	4.01874	1.92224	2.56274	3.68412	2.14325	3.70355	4.30839	3.15643	3.89577	2.60258	2.343	Function unknown	PREDICTED: putative late blight resistance protein homolog R1A-3, partial [Solanum tuberosum]
RHC12H2G0306.2.gene	1.49075	1.62159	1.85078	3.07893	3.39421	3.10318	1.86294	2.06519	1.54722	3.25488	2.88672	0.136243	1.4838	2.81743	1.74382	2.01803	2.35008	2.10968	2.70349	2.52345	2.82525	2.7414	3.35701	2.89429	Function unknown	PREDICTED: putative late blight resistance protein homolog R1A-10 [Solanum tuberosum]
RHC12H2G0305.2.gene	0.521099	0.309746	1.01879	0.22863	0	0.271205	0.076375	0.307191	0.147421	0.563561	0.79094	0.775408	0.186764	0.70498	0.482419	0.347018	0.680061	0.355009	2.00971	0.984822	1.49094	0.607387	0.289024	0.416307	Posttranslational modification, protein turnover, chaperones	PREDICTED: E3 ubiquitin-protein ligase RMA1H1-like [Solanum tuberosum]
RHC12H2G0304.2.gene	3.53251	6.37713	6.73803	8.70858	5.7065	5.36066	4.20202	4.41004	3.38459	4.4093	5.36117	6.38687	2.29122	3.7284	4.84533	6.36803	4.22469	5.54116	4.8911	4.67472	5.42746	4.0411	6.21501	4.33613	Function unknown	PREDICTED: putative ribosomal-protein-alanine acetyltransferase isoform X1 [Solanum tuberosum]
RHC12H2G0303.2.gene	2.54117	2.60488	2.05939	3.13756	2.76081	3.04538	2.09537	3.3732	2.08913	2.98416	2.85103	2.28777	1.61904	2.53736	1.60218	3.11211	2.99687	3.11199	3.12717	3.02817	3.90165	4.21908	4.39632	3.74585	Carbohydrate transport and metabolism	PREDICTED: probable polyol transporter 4 [Solanum tuberosum]
RHC12H2G0302.2.gene	0.539633	0.38141	0.577156	1.03357	1.15885	1.03773	0.479566	0.695991	0.425309	0.413124	0.554072	0.446669	0.39471	0.648547	0.176483	0.641515	0.560795	0.795721	0.435332	0.588295	0.393813	0.901716	0.487958	0.537396	Function unknown	PREDICTED: uncharacterized protein LOC107061078 [Solanum tuberosum]
RHC12H2G0300.2.gene	2.20889	2.65861	2.90614	13.354	8.0918	12.063	5.93472	6.35925	7.01486	8.10231	6.53506	5.87416	6.09216	5.22794	4.06649	13.0689	11.5805	9.42697	5.95159	6.60131	4.23466	16.1411	18.3769	21.3938	Function unknown	PREDICTED: uncharacterized protein LOC102604966 [Solanum tuberosum]
RHC12H2G0299.2.gene	1.07934	0.897361	0.871649	2.89221	3.37705	3.25264	2.90576	2.70691	2.39319	2.92495	2.80516	2.31762	3.29482	2.866	3.46219	2.31867	2.04675	2.3078	2.74967	2.2881	2.94574	2.26362	2.46576	2.35615	Signal transduction mechanisms	PREDICTED: protein STRUBBELIG-RECEPTOR FAMILY 3 isoform X1 [Solanum tuberosum]
RHC12H2G0298.2.gene	4.71385	3.89082	3.62765	3.53991	6.11675	5.14737	3.21168	3.35909	3.32864	3.14763	3.2617	2.68665	2.93442	3.35171	2.955	3.25382	4.3787	3.89821	3.03782	3.77498	3.52551	4.81768	5.15548	5.13856	Intracellular trafficking, secretion, and vesicular transport	PREDICTED: secretory carrier-associated membrane protein 1-like [Solanum tuberosum]
RHC12H2G0295.2.gene	12.7782	14.7009	11.8868	6.16675	6.6015	7.18826	7.5412	8.48176	7.32683	3.40289	5.16736	4.15601	6.09927	4.18839	5.39258	6.60331	5.72532	6.61747	5.80911	4.64041	6.02233	6.10507	7.84814	6.36095	Function unknown	PREDICTED: ras-related protein RABA1f isoform X3 [Solanum tuberosum]
RHC12H2G0293.2.gene	1.41043	0.975619	1.58526	0.830034	0.813117	0.538773	1.47078	1.03705	1.80847	0.511143	0.478639	0.875851	1.20807	0.890615	0.821441	0.424385	0.476469	0.49297	1.0963	0.77855	0.491003	0.427312	0.50205	0.988762	Transcription	PREDICTED: basic leucine zipper 34-like [Solanum tuberosum]
RHC12H2G0290.2.gene	5.20471	4.54013	4.80032	4.60379	4.4406	4.71136	4.67104	5.34955	3.56657	6.14191	6.23608	5.51033	4.9134	5.38848	6.50401	3.42262	3.79528	4.96943	5.03256	5.20224	5.36651	4.09622	4.5441	5.26136	Function unknown	PREDICTED: uncharacterized protein LOC102601397 isoform X1 [Solanum tuberosum]
RHC12H2G0288.2.gene	50.2267	57.239	43.6761	39.3504	47.0206	47.023	49.0856	51.2428	49.7977	60.4287	48.8376	55.0905	50.6068	72.2534	46.1156	36.7493	47.3105	40.8189	61.2139	65.5231	59.0819	37.7427	34.067	35.2675	Amino acid transport and metabolism	PREDICTED: ketol-acid reductoisomerase, chloroplastic-like [Solanum tuberosum]
RHC12H2G0287.2.gene	0.284837	0.186943	0	0	0	0.255745	0	0	0	0	0.09952	0.166625	0	0	0	0	0	0.41777	0.147901	0.07356	0	0.118514	0	0.30646	Function unknown	PREDICTED: uncharacterized protein LOC107061099 [Solanum tuberosum]
RHC12H2G0286.2.gene	50.9291	51.2232	49.7979	46.8683	45.7532	49.5891	39.0077	45.5222	40.8284	31.0339	30.905	34.0823	45.4111	36.5202	44.6802	43.7261	47.1456	47.969	39.219	39.6975	36.1899	46.7858	44.7746	50.736	Signal transduction mechanisms	PREDICTED: 14-3-3 protein 8 isoform X1 [Solanum tuberosum]
RHC12H2G0285.2.gene	74.7898	71.7958	72.8766	31.5425	33.6516	33.3767	56.6968	57.2149	63.7368	68.7674	63.9563	69.1398	53.8896	63.6043	50.6697	52.658	52.5456	54.0314	56.2641	69.8747	65.4216	40.7028	40.9022	45.3306	Function unknown	PREDICTED: uncharacterized protein LOC102599925 [Solanum tuberosum]
RHC12H2G0283.2.gene	6.54917	6.03949	5.52355	8.11973	7.56628	7.29552	13.6532	13.59	12.2865	8.54271	7.35426	7.16117	11.2857	6.98259	12.2129	9.16109	8.77672	9.38587	7.19678	6.55474	6.45458	7.9753	8.15163	8.21056	Transcription	PREDICTED: trihelix transcription factor ASIL1-like [Solanum tuberosum]
RHC12H2G0282.2.gene	4.23687	4.01569	4.25443	2.51632	3.33504	3.24229	5.59433	7.12371	6.98335	6.49017	6.59116	6.23731	9.01784	5.75239	8.74009	4.31378	3.58367	3.55307	6.35747	5.19184	4.91412	2.94676	3.15139	3.40589	Function unknown	PREDICTED: F-box/LRR-repeat MAX2 homolog A-like isoform X1 [Solanum tuberosum]
RHC12H2G0281.2.gene	62.3777	63.3466	59.9996	66.1334	69.8288	62.571	52.9856	49.1397	55.9601	51.3265	52.0007	54.2615	46.2438	62.1253	48.3786	38.6307	42.8037	41.436	55.9117	64.4207	60.0709	39.8804	38.2318	39.6751	Function unknown	PREDICTED: phospholipase A1-IIdelta-like [Solanum tuberosum]
RHC12H2G0279.2.gene	77.3171	81.3144	87.4561	73.7217	75.6157	76.3297	70.0215	68.3647	67.4098	68.4053	82.6034	62.3849	76.6562	82.7332	58.5822	61.6848	61.5917	61.366	70.2342	83.1795	80.8072	61.0485	64.4047	58.5203	Translation, ribosomal structure and biogenesis	60S ribosomal protein L11-2-like [Solanum tuberosum]
RHC12H2G0274.2.gene	0.397746	0.510162	0.4189	2.54987	2.5937	0.29993	0.458812	0.484052	0.533132	0.41598	0.738155	0.598402	0.347936	0.605327	0.173556	1.57274	1.52144	0.220429	0.480449	0.718223	0.727825	0.518284	0.4618	0.351124	--	PREDICTED: acetyl-CoA-benzylalcohol acetyltransferase-like [Solanum tuberosum]
RHC12H2G0273.2.gene	0.671202	0.763569	0.633475	8.87075	9.05949	8.35893	2.59085	1.55298	1.7826	6.13739	5.66186	6.30074	1.73958	5.85708	1.44836	6.9795	5.39218	6.94531	4.50875	4.54775	5.59971	11.1012	9.87638	11.6804	Function unknown	PREDICTED: 2-alkenal reductase (NADP(+)-dependent)-like [Solanum tuberosum]
RHC12H2G0271.2.gene	11.8283	11.0071	11.6054	11.6882	11.1197	20.0406	13.5213	14.5491	13.846	25.8027	14.708	15.6439	10.9658	19.6697	12.5939	11.1071	11.3849	12.7613	18.7522	18.8292	28.3725	12.8722	12.7988	13.5435	Energy production and conversion	PREDICTED: citrate synthase, glyoxysomal-like [Solanum tuberosum]
RHC12H2G0270.2.gene	39.2252	36.9436	38.2264	66.0437	64.0728	65.4034	34.188	39.9608	36.8508	48.2145	33.6119	44.0874	25.1058	43.405	22.5024	52.6619	56.3407	55.7808	44.4795	38.1051	37.7877	57.784	64.6399	65.0377	Function unknown	PREDICTED: nascent polypeptide-associated complex subunit alpha, muscle-specific form-like [Solanum tuberosum]
RHC12H2G0269.2.gene	6.46527	7.16804	8.25277	3.08327	2.29044	3.09722	3.75568	3.70942	4.37255	3.7153	2.43018	4.47248	2.39027	3.64637	1.61674	1.77589	1.35156	2.67663	3.31389	3.57558	4.40895	2.48482	1.99193	1.80198	Function unknown	PREDICTED: uncharacterized protein LOC102595000 [Solanum tuberosum]
RHC12H2G0268.2.gene	1.38237	1.52916	1.74195	0.219502	0.203755	0.078396	1.18711	1.91999	1.41499	0.876357	0.872931	0.58313	5.14637	0.952457	4.93475	0.609895	0.374368	0.310961	1.75327	2.40741	1.8891	0.334032	0.615874	0.661637	Carbohydrate transport and metabolism	PREDICTED: xyloglucan endotransglucosylase/hydrolase 2-like [Solanum tuberosum]
RHC12H2G0267.2.gene	2.34368	3.08621	1.93521	1.03555	1.32753	1.24765	5.38026	8.16023	7.51064	3.40532	3.97584	2.71654	8.92761	6.50719	7.45867	1.38986	1.13044	1.25518	6.48759	6.45469	5.89536	1.22775	1.15095	1.27876	Carbohydrate transport and metabolism	PREDICTED: xyloglucan endotransglucosylase/hydrolase 2-like [Solanum tuberosum]
RHC12H2G0266.2.gene	0.419223	0.373104	0.302917	0.365964	0.501038	0.343289	0.291586	0.285859	0.19032	0.471094	0.509199	0.430791	0.081682	0.528056	0.106747	0.408663	0.355487	0.335277	0.320642	0.280961	0.419764	0.731368	0.562541	0.318119	Function unknown	PREDICTED: linoleate 13S-lipoxygenase 2-1, chloroplastic-like [Solanum tuberosum]
RHC12H2G0263.2.gene	14.2452	6.16103	5.39836	10.8303	11.9577	8.12646	15.233	15.0828	15.0443	10.5201	10.2817	10.0768	10.9017	11.136	14.0408	15.5069	13.0978	12.6373	12.8585	11.696	10.0849	9.39851	10.8862	8.31584	Posttranslational modification, protein turnover, chaperones	PREDICTED: subtilisin-like protease SBT5.3 [Solanum tuberosum]
RHC12H2G0262.2.gene	12.637	12.3693	15.0808	12.9514	10.8883	11.8796	9.40658	9.27474	9.44543	9.28225	9.59577	9.20513	9.65334	10.0475	10.1456	9.9442	8.93182	8.43209	10.703	11.2473	10.2188	11.9048	11.2373	10.9276	Lipid transport and metabolism	PREDICTED: 3-hydroxyisobutyryl-CoA hydrolase-like protein 5 [Solanum tuberosum]
RHC12H2G0261.2.gene	0.476668	0.753837	0.681108	1.04654	1.16183	0.761375	0.74336	0.564896	0.783581	0.412363	0.571891	0.393786	0.4808	0.318444	0.562223	0.606696	0.830048	0.913413	0.43631	0.349513	0.627888	1.32573	0.960003	1.19219	Lipid transport and metabolism	PREDICTED: phospholipase D alpha 1-like [Solanum tuberosum]
RHC12H2G0260.2.gene	3.56931	3.92049	3.18189	3.21342	3.49445	3.09777	3.6635	2.7521	2.98133	2.74235	3.98516	3.2677	2.63823	3.00115	2.506	3.63129	3.67127	3.8661	4.46399	3.25678	3.21581	3.33213	4.67804	3.33332	Transcription	PREDICTED: general transcription factor 3C polypeptide 5-like isoform X1 [Solanum tuberosum]
RHC12H2G0259.2.gene	7.22796	9.36436	7.73322	12.2807	12.568	12.8777	13.3104	13.2858	10.7414	13.8612	13.5903	12.9163	9.27135	13.5602	8.95751	14.2312	14.1433	14.4133	13.1524	12.5624	15.5548	12.6609	14.3441	13.4721	Function unknown	PREDICTED: uncharacterized protein LOC102590780 isoform X1 [Solanum tuberosum]
RHC12H2G0258.2.gene	0.702189	0.540303	0.475838	0.518765	0.641548	0.366418	0.297532	0.291653	0.395634	0.484225	0.353602	0.335312	0.313598	0.648395	0.260978	0.342805	0.391233	0.203573	0.18958	0.517311	0.525128	0.275452	0.425871	0.895385	Transcription	PREDICTED: probable WRKY transcription factor 71 [Solanum tuberosum]
RHC12H2G0254.2.gene	6.00561	5.07336	5.38591	8.28704	7.64497	5.07761	4.97897	3.6076	5.69847	3.37064	4.33699	4.4321	4.93282	6.7693	3.36838	5.20331	5.68905	3.44824	7.42861	5.77849	4.10761	6.34768	7.30215	7.98709	Translation, ribosomal structure and biogenesis	PREDICTED: elongation factor Ts, mitochondrial [Solanum tuberosum]
RHC12H2G0252.2.gene	0.997277	1.84671	1.76425	0.386659	0.732346	0.598811	0.604325	0.72569	0.733691	0.591478	0.40292	0.398711	0.590822	0.550851	0.756568	2.99073	1.07279	1.04836	0.32974	0.642472	0.342993	0.925523	1.11158	0.624778	Cytoskeleton	PREDICTED: kinesin-related protein 6 isoform X2 [Solanum tuberosum]
RHC12H2G0251.2.gene	3.49301	1.76105	2.92302	1.31366	1.66816	2.79568	1.80461	1.94545	1.54454	1.83797	1.80763	1.40128	1.95052	1.47182	1.47325	3.55672	2.02883	2.17152	1.39526	1.16404	1.06409	2.24628	2.09249	2.53255	Cytoskeleton	PREDICTED: uncharacterized protein LOC101255070 isoform X1 [Solanum lycopersicum]
RHC12H2G0249.2.gene	0.874836	1.37907	1.69829	1.65226	1.42251	1.32184	2.81389	3.01997	2.07616	1.75145	1.62662	1.2827	2.59628	1.13174	2.43776	1.40502	0.612653	0.763033	2.05008	1.59081	2.14017	0.961705	1.1372	1.18798	Posttranslational modification, protein turnover, chaperones	hypothetical protein CUMW_167740 [Citrus unshiu]
RHC12H2G0248.2.gene	4.42522	5.79627	5.11705	6.14042	5.67652	7.87515	5.3278	6.61648	4.80758	5.44262	4.42909	5.57023	4.18859	5.72595	4.09047	6.47305	8.55937	7.708	7.59404	5.75022	5.88121	6.72576	7.08457	6.32297	Signal transduction mechanisms	PREDICTED: ethylene receptor 1 isoform X1 [Solanum tuberosum]
RHC12H2G0247.2.gene	4.24515	0	0	0	0	0	1.61922	0	0	0	0	0.27499	0	0	0	0	0	0	0	0	0	0	0	0	Function unknown	PREDICTED: polyadenylate-binding protein-interacting protein 8-like [Solanum tuberosum]
RHC12H2G0240.2.gene	2.40515	3.26533	3.82676	3.27288	3.96369	3.0872	5.07102	4.42155	5.6086	4.43717	4.63943	6.13012	2.03018	2.29576	2.51511	3.70769	2.90618	3.64576	3.26873	3.44123	3.5726	3.8156	3.30466	3.40434	Function unknown	PREDICTED: uncharacterized protein LOC107005684 [Solanum pennellii]
RHC12H2G0239.2.gene	0.56586	0.838841	0.473154	2.41895	1.64807	1.74979	0.574379	0.722319	0.893946	1.80318	1.75875	2.06599	0.45919	1.62401	0.785976	0.998596	0.831885	0.916584	1.05588	1.41213	1.29941	1.67964	1.08422	1.08845	Function unknown	PREDICTED: C2 domain-containing protein At1g53590-like isoform X1 [Solanum tuberosum]
RHC12H2G0238.2.gene	0.343872	0.060011	0.474525	0.064964	0.661039	0.202667	0.480162	0.429209	0.425112	0.535064	0.533558	0.753062	0.289587	0.213867	0.155247	0.551789	0.20375	0.53838	0.586824	0.606699	0.880227	0.548566	0.641026	0.223166	Function unknown	PREDICTED: persulfide dioxygenase ETHE1 homolog, mitochondrial-like [Solanum tuberosum]
RHC12H2G0237.2.gene	24.812	24.6963	28.5707	8.19205	8.17261	11.7541	39.8589	44.6971	47.7469	31.927	35.0997	35.3602	38.6855	26.4819	35.0482	28.8776	29.2359	26.7612	31.3334	32.1922	30.5233	14.5071	14.1635	15.1014	Function unknown	PREDICTED: 60S ribosomal protein L18a-like protein [Solanum tuberosum]
RHC12H2G0236.2.gene	208.515	218.707	214.384	10.4031	9.92376	12.9461	262.516	236.399	282.116	122.224	111.328	119.795	208.82	87.8186	209.681	252.946	251.687	256.648	84.8874	105.711	91.8443	118.928	117.037	122.683	Function unknown	PREDICTED: chlorophyll a-b binding protein 13, chloroplastic [Solanum tuberosum]
RHC12H2G0235.2.gene	1.4802	0.764717	0.86068	0.19755	0.747319	0.301022	1.546	0.671601	1.17215	0.334251	0.194151	0.13706	1.41712	0.472532	1.65082	0.483581	0.967225	0.487907	0.124962	0.330585	0.938169	0.14167	0	0.175769	Chromatin structure and dynamics	PREDICTED: probable histone H2B.3 [Populus euphratica]
RHC12H2G0234.2.gene	10.2049	10.9157	15.1155	17.5325	18.6769	17.7818	31.9107	32.9605	33.6663	36.1657	46.4997	33.2742	40.0268	36.6743	40.0721	30.1626	31.2901	28.813	37.9083	36.1747	37.1183	18.2357	17.6006	18.0043	Function unknown	PREDICTED: uncharacterized protein LOC107005199 [Solanum pennellii]
RHC12H2G0233.2.gene	10.0141	7.84942	8.52576	5.1773	4.17683	3.71702	5.55905	3.9554	4.29536	3.541	2.94129	3.2078	8.20587	3.16342	8.92228	3.31557	3.93683	4.38283	4.05434	2.95504	3.95238	1.61373	1.67941	2.48147	Chromatin structure and dynamics	PREDICTED: histone H2B.3-like isoform X3 [Nicotiana tabacum]
RHC12H2G0231.2.gene	35.6609	38.1876	44.1949	31.8411	28.8973	28.2599	45.4322	40.9817	38.4306	33.4772	35.6192	28.5272	38.0708	32.9537	40.2938	31.3481	32.6525	36.6606	32.3582	34.3586	39.5757	23.685	25.5448	26.3625	Function unknown	PREDICTED: uncharacterized protein LOC102584949 isoform X2 [Solanum tuberosum]
RHC12H2G0230.2.gene	1.82465	1.43845	2.20775	1.0801	1.42929	2.06643	0.574996	0.741479	0.854025	1.08716	0.88402	1.26938	0.583758	1.04964	0.584274	1.16063	1.09199	0.878833	0.752774	0.927129	0.872311	1.23813	0.816644	0.842074	Inorganic ion transport and metabolism	PREDICTED: PAP-specific phosphatase HAL2-like [Solanum tuberosum]
RHC12H2G0229.2.gene	5.12917	4.95605	4.30262	4.7304	4.744	4.53015	5.55323	4.35964	4.33978	3.83319	4.11269	3.8517	3.75898	4.11002	4.08556	3.8331	4.50759	3.35731	4.08225	4.03684	4.29918	4.11214	3.13963	3.356	Posttranslational modification, protein turnover, chaperones	PREDICTED: peptidyl-prolyl cis-trans isomerase CYP37, chloroplastic isoform X1 [Solanum tuberosum]
RHC12H2G0227.2.gene	0.421002	0.32609	0.398874	0.461103	0.465096	0.460393	0.38229	0.546271	0.43816	0.503022	0.397641	0.384279	0.258176	0.53411	0.370206	0.43868	0.585952	0.608013	0.739075	0.567715	0.490452	0.591915	0.507626	0.525924	Replication, recombination and repair	PREDICTED: uncharacterized protein LOC101256850 [Solanum lycopersicum]
RHC12H2G0225.2.gene	11.971	11.6028	10.5984	14.3672	15.2712	15.9742	7.46864	8.65087	8.49144	14.9586	17.0688	15.3262	19.0798	14.623	18.6017	9.78585	10.7248	9.81514	11.0217	12.6624	13.1765	15.5362	12.0308	14.1123	Transcription	jasmonic acid 2 [Solanum lycopersicum]
RHC12H2G0222.2.gene	8.86619	10.8987	14.5013	9.22415	9.31585	10.7309	5.36403	4.63696	4.30963	5.61462	7.94204	4.54017	9.22531	4.60195	7.96438	4.73419	9.0711	9.95882	6.43061	3.88377	5.42363	10.2137	6.42317	11.2616	Function unknown	PREDICTED: uncharacterized protein LOC102590575 [Solanum tuberosum]
RHC12H2G0218.2.gene	10.3445	15.6665	14.0713	1.00349	2.35547	1.76792	10.6517	6.62428	9.21831	11.8638	6.5438	11.1767	6.58727	15.6588	4.80882	7.87792	8.19316	8.3851	10.9901	11.4685	15.1364	2.54815	3.72667	2.96813	--	PREDICTED: FAD-dependent urate hydroxylase-like isoform X3 [Solanum tuberosum]
RHC12H2G0215.2.gene	41.7423	43.018	44.2809	29.4589	29.0769	26.1948	51.0117	52.4463	45.9456	52.3717	52.4852	42.5678	22.1856	58.4605	20.21	42.397	42.7565	39.7079	58.5122	62.6118	55.703	24.7188	26.2986	26.6026	--	PREDICTED: FAD-dependent urate hydroxylase-like isoform X3 [Solanum tuberosum]
RHC12H2G0214.2.gene	61.0218	63.081	67.1867	22.1524	21.2959	23.5269	132.281	126.883	143.534	108.55	94.9741	104.752	47.1031	143.254	44.2836	88.4531	95.0227	91.2437	158.718	148.217	143.552	42.631	46.2525	42.4779	Function unknown	PREDICTED: LOW QUALITY PROTEIN: stem-specific protein TSJT1 [Solanum tuberosum]
RHC12H2G0213.2.gene	95.1341	100.417	87.2013	32.8984	31.2503	33.7939	103.491	102.595	112.238	51.6057	45.0359	45.7724	91.8348	74.4539	86.5475	181.524	203.831	212.643	65.4576	72.2261	64.3143	163.93	158.002	177.443	Function unknown	PREDICTED: protochlorophyllide reductase-like [Solanum tuberosum]
RHC12H2G0212.2.gene	1.13229	1.14965	0.723182	0.063101	0.075253	0.054557	0.458661	0.428939	0.423275	0.566929	0.487472	0.489596	0.320883	0.889156	0.418121	0.300718	0.186524	0.279503	0.802837	0.654837	0.746529	0.130167	0.12407	0.256744	Function unknown	PREDICTED: probable leucine-rich repeat receptor-like protein kinase At1g35710 [Solanum tuberosum]
RHC12H2G0210.2.gene	0.820012	0.313432	0	0	0.04661	0.546414	1.25721	0.47511	0.886416	0.975855	0.963784	0.9684	0.79583	0	0.133241	1.91685	0.327963	0.926305	0.267767	0.843717	0.135599	1.32814	0.426303	2.38238	Posttranslational modification, protein turnover, chaperones	PREDICTED: E3 ubiquitin-protein ligase RMA3-like isoform X1 [Solanum tuberosum]
RHC12H2G0208.2.gene	5.64635	6.0326	4.47911	9.83687	8.31179	8.98169	4.99656	7.58674	5.99412	6.28707	6.37275	7.26162	3.87732	8.24705	5.09556	5.97184	7.29254	6.28767	9.63201	9.59994	6.64121	8.29033	2.33144	6.65725	Posttranslational modification, protein turnover, chaperones	PREDICTED: E3 ubiquitin-protein ligase RMA3-like isoform X1 [Solanum tuberosum]
RHC12H2G0207.2.gene	93.684	85.3817	104.962	54.4642	50.3717	50.5523	101.086	90.7745	114.92	59.1711	61.7512	60.882	79.5289	47.6564	82.2559	89.7238	77.5809	81.3855	47.504	63.8833	51.6851	58.0245	50.3309	61.5516	Posttranslational modification, protein turnover, chaperones	PREDICTED: thioredoxin-1-like [Solanum tuberosum]
RHC12H2G0206.2.gene	2.63335	2.70372	2.87219	6.34431	4.56999	5.68607	2.70415	2.72352	2.40869	5.20573	4.90399	6.46913	2.03759	6.10472	1.56461	3.00111	3.22402	3.01776	5.07601	4.64057	5.26842	3.57978	4.23387	3.39173	Posttranslational modification, protein turnover, chaperones	PREDICTED: uncharacterized protein LOC102587645 [Solanum tuberosum]
RHC12H2G0205.2.gene	4.73332	4.55904	4.23538	0.921006	2.04486	1.54601	3.12425	3.59395	4.43353	4.74909	1.78103	6.32665	1.98267	4.81098	2.30438	2.54356	2.83695	2.51745	5.25803	4.50547	4.9438	1.54688	2.21636	1.63295	Signal transduction mechanisms	PREDICTED: protein SPA1-RELATED 4-like isoform X1 [Solanum tuberosum]
RHC12H2G0203.2.gene	0.434073	0.340472	0.482203	0.433404	0.846713	0.660055	0.393482	0.141486	0.30094	0.281601	0.105123	0.288381	0.323237	0.322972	0.242529	0.298989	0.449982	0.42111	0.161184	0.244669	0.159877	0.142932	0.189134	0.323398	Function unknown	PREDICTED: proton pump-interactor 1-like [Solanum tuberosum]
RHC12H2G0201.2.gene	1.43312	1.49804	0.870326	1.48052	1.21927	1.57339	0.914572	0.709201	1.21649	1.49577	0.779095	0.802621	0.67834	0.969019	0.817996	1.08054	0.63855	0.807584	0.929044	1.30589	0.995476	1.14232	1.09302	1.10421	Function unknown	PREDICTED: putative RNA-binding protein YlmH isoform X2 [Solanum tuberosum]
RHC12H2G0200.2.gene	2.07728	1.82942	2.31408	0.749192	1.25516	1.87481	2.27211	0.824668	1.77215	1.25544	0.538098	1.985	1.36516	0.618	0.62374	1.31118	0.385213	2.81104	1.45321	1.75882	1.65342	0.407153	2.33901	1.37605	Replication, recombination and repair	PREDICTED: origin of replication complex subunit 3 isoform X1 [Solanum tuberosum]
RHC12H2G0199.2.gene	4.56175	4.89276	5.13381	6.50859	6.98967	6.15536	5.92296	5.97121	5.59728	5.47177	5.40524	5.68069	4.16547	5.58605	4.38143	5.82795	6.17918	5.81947	6.61893	7.18018	5.84144	5.83584	4.90817	5.53382	Function unknown	PREDICTED: uncharacterized protein LOC102586426 [Solanum tuberosum]
RHC12H2G0197.2.gene	32.0855	29.3588	24.4174	17.295	17.5596	18.8812	29.9402	29.1667	31.9657	23.6444	19.0469	24.0671	25.7581	23.9389	21.1085	31.4332	41.1126	31.3642	22.2352	22.3161	23.1877	30.5347	26.1062	32.9351	Function unknown	PREDICTED: early nodulin-like protein 2 [Solanum tuberosum]
RHC12H2G0196.2.gene	3.85176	4.0188	3.67401	4.15537	4.05002	5.04839	3.23065	2.69735	2.76199	2.8776	3.68419	3.46749	2.43574	2.79765	2.23888	3.67098	3.06831	3.09446	4.19522	3.40591	2.37453	4.5387	3.09578	3.49916	Function unknown	PREDICTED: PRA1 family protein H [Solanum tuberosum]
RHC12H2G0195.2.gene	0.679844	1.02525	0.870825	2.49599	2.2229	2.66408	0.928277	1.33375	2.19964	0.627396	3.94541	2.86688	1.62	3.21306	1.02288	2.26773	2.56138	3.47965	2.89329	1.5374	1.88917	2.01205	2.10973	4.77731	Function unknown	PREDICTED: protein yippee-like At5g53940 [Solanum tuberosum]
RHC12H2G0193.2.gene	5.48085	5.81075	4.9822	9.77818	8.60429	10.2484	10.4621	11.8105	11.3295	10.7764	11.6992	10.9711	6.93171	11.9452	8.95031	11.2742	12.9639	12.8665	13.3909	11.3709	12.3742	11.2556	11.0178	9.7992	Function unknown	PREDICTED: sec1 family domain-containing protein MIP3 [Solanum tuberosum]
RHC12H2G0192.2.gene	0.484266	0.410173	0.453701	0.707476	0.924034	0.478851	0.463073	0.49231	0.36395	0.793076	0.488533	0.414667	0.164624	0.768778	0.344859	0.362185	0.548519	0.641562	0.440439	0.504275	0.461319	1.11119	0.821952	1.10248	--	PREDICTED: uncharacterized protein LOC102584213 [Solanum tuberosum]
RHC12H2G0191.2.gene	11.1307	11.4248	10.8266	10.9669	12.3933	12.4538	7.61122	8.29896	6.09779	9.33333	8.01831	7.43504	6.76991	9.42558	5.8616	11.1305	10.8754	10.6359	8.93475	8.11849	9.33519	11.3092	11.6616	12.1894	Signal transduction mechanisms	PREDICTED: serine/threonine-protein kinase EDR1 isoform X2 [Solanum tuberosum]
RHC12H2G0190.2.gene	9.71234	8.41179	7.1025	25.1832	27.6922	16.0949	6.65647	7.61477	7.09154	19.9886	18.3792	15.3686	7.18033	21.1336	6.12816	9.62088	12.122	8.47321	16.171	12.8676	19.8189	21.4313	22.8443	15.0668	Translation, ribosomal structure and biogenesis	PREDICTED: 50S ribosomal protein L1 [Solanum tuberosum]
RHC12H2G0189.2.gene	0.820627	0.472775	0.553223	1.02029	1.39382	1.38361	0.783221	0.596823	0.711477	0.998201	0.473288	0.732758	0.256769	1.0128	0.43197	0.385735	0.769994	0.567416	0.975587	0.571776	0.642556	1.30513	0.893923	0.573616	Function unknown	PREDICTED: putative pentatricopeptide repeat-containing protein At3g15200 [Solanum tuberosum]
RHC12H2G0188.2.gene	14.1943	14.8612	14.1461	10.7815	11.8405	11.8388	17.1237	17.8567	19.4782	20.8845	19.3162	18.796	27.596	19.0983	29.1084	15.3425	16.3555	17.3386	18.062	20.0874	19.428	12.8226	11.129	11.8218	Function unknown	PREDICTED: UDP-glucose flavonoid 3-O-glucosyltransferase 6-like [Solanum tuberosum]
RHC12H2G0187.2.gene	7.15987	8.37715	5.79713	28.5197	28.6451	28.3105	10.8871	11.5892	11.9835	16.4287	17.0911	16.2715	8.73461	13.956	9.8219	15.0819	17.4302	16.874	17.7874	13.7581	14.2953	24.768	24.0365	21.3638	Function unknown	PREDICTED: SOSS complex subunit B homolog [Solanum tuberosum]
RHC12H2G0185.2.gene	7.28506	7.79745	4.84975	7.37877	5.73857	6.38068	4.77071	5.8394	4.35002	5.08021	5.18211	5.89971	5.11136	7.71547	3.81209	6.37255	3.96345	3.74213	8.43278	6.10923	6.48923	5.77348	4.42716	5.16577	Energy production and conversion	PREDICTED: reticulon-4-interacting protein 1, mitochondrial [Solanum tuberosum]
RHC12H2G0183.2.gene	8.34879	6.04705	5.85364	9.8202	8.66821	7.81589	5.11436	4.45929	4.37394	8.38099	6.60871	6.67505	4.77674	7.60302	4.79012	6.14786	5.76224	5.86331	9.17379	5.9242	8.99683	8.81404	6.94762	8.03355	Replication, recombination and repair	PREDICTED: RNA exonuclease 4 [Solanum tuberosum]
RHC12H2G0182.2.gene	6.65266	4.80957	5.4569	12.3904	13.1159	12.6846	12.1477	12.9872	8.92	13.2477	12.9984	13.2745	8.22331	11.7051	8.4436	10.9735	13.2299	12.061	12.1717	10.3611	12.9904	15.7118	15.9381	14.2656	Posttranslational modification, protein turnover, chaperones	PREDICTED: probable E3 ubiquitin-protein ligase HIP1 [Solanum tuberosum]
RHC12H2G0181.2.gene	13.8188	14.8629	16.2169	14.8299	12.2577	15.0424	9.21063	9.36564	9.18991	10.0882	9.88751	9.0704	8.8192	11.2822	9.89504	12.152	10.8358	10.0792	12.9698	11.2261	11.5243	13.5886	11.5477	13.5714	Function unknown	PREDICTED: ras-related protein Rab11B [Solanum lycopersicum]
RHC12H2G0179.2.gene	3.74739	4.23344	3.97324	21.3269	21.8965	22.3537	7.33226	8.43643	8.28359	13.7545	14.1692	11.8932	3.88259	11.4014	4.17146	11.633	10.9862	12.9379	12.0282	13.4803	12.2457	19.9139	19.8959	20.7375	Secondary metabolites biosynthesis, transport and catabolism	homogentisate 1,2-dioxygenase [Solanum lycopersicum]
RHC12H2G0178.2.gene	1.34407	1.08161	1.12775	2.44353	2.44304	2.3429	1.08025	1.18781	0.827089	1.59628	1.34544	1.62072	0.59159	1.11319	0.611932	1.64952	2.17358	2.09873	1.89922	1.19681	1.35373	2.58086	2.55022	2.10989	Inorganic ion transport and metabolism	PREDICTED: uncharacterized protein LOC102579474 [Solanum tuberosum]
RHC12H2G0177.2.gene	1.31524	1.58795	1.49572	3.15608	3.86835	4.12459	2.19951	2.40928	1.46134	2.64565	2.62582	2.27037	1.27052	2.42556	1.57582	3.0436	2.04798	3.22886	2.64939	2.66857	3.42515	3.82961	4.01931	3.68705	Function unknown	PREDICTED: uncharacterized protein LOC102579150 [Solanum tuberosum]
RHC12H2G0176.2.gene	0.983069	1.49852	1.07519	0.923018	0.886308	0.639492	0.435358	0.660384	0.077976	0.649711	0.760991	0.304863	0.117786	0.184841	0.526593	0.903093	0.877254	1.68484	1.04761	0.139164	0.43206	0.323603	0.363763	0.753201	Function unknown	PREDICTED: protein IQ-DOMAIN 1 [Solanum tuberosum]
RHC12H2G0175.2.gene	6.89222	8.18985	7.56157	15.0883	14.8415	12.4066	10.8549	8.3963	8.92353	7.12327	7.2161	8.32367	4.92779	5.26523	5.52328	22.1012	17.6568	17.8831	5.89694	5.46547	6.15471	33.2486	36.933	33.1333	Transcription	PREDICTED: transcription factor TCP4-like [Solanum tuberosum]
RHC12H2G0174.2.gene	8.1724	9.07	6.45358	18.6514	18.2982	20.4462	10.7417	11.7808	6.62635	11.9704	15.8858	10.232	8.2567	10.2571	4.84162	19.6032	15.2902	14.9129	9.93248	3.99189	10.1172	21.6516	24.1689	19.9454	Function unknown	PREDICTED: uncharacterized protein ycf45-like isoform X1 [Solanum tuberosum]
RHC12H2G0173.2.gene	12.2834	11.9146	11.4029	16.8355	14.2173	18.9063	8.82366	9.48606	8.67985	9.61906	8.81158	11.1268	10.0604	14.2369	8.66419	9.67332	11.3009	11.046	13.935	12.7857	11.3386	14.8759	13.9098	16.3378	Energy production and conversion	PREDICTED: malate dehydrogenase, mitochondrial-like isoform X1 [Solanum tuberosum]
RHC12H2G0172.2.gene	6.77811	7.20767	6.95117	16.4904	16.6821	16.7441	7.8113	6.966	6.54772	12.2032	13.6087	12.031	5.69288	12.7833	4.46651	10.1813	9.77874	8.89852	11.5596	11.8367	10.7113	14.95	14.5511	13.5017	Translation, ribosomal structure and biogenesis	PREDICTED: tRNA dimethylallyltransferase 9 isoform X1 [Solanum tuberosum]
RHC12H2G0171.2.gene	1.6348	1.88552	2.70445	2.04132	2.27953	2.33779	1.89608	1.21691	0.747487	0.643018	1.12507	1.10599	1.10774	1.04499	1.13796	2.21165	2.51258	1.29982	1.026	0.677254	1.55202	2.83234	3.11291	2.35483	Function unknown	PREDICTED: protein trichome birefringence-like 31 [Solanum tuberosum]
RHC12H2G0170.2.gene	3.95203	4.39571	4.26973	18.2649	19.8861	6.76735	14.7429	17.1891	17.6603	17.2542	5.70291	6.33258	21.663	5.96979	18.7053	13.978	5.14728	16.1428	4.54816	19.845	18.0792	16.3082	4.90113	4.69753	Function unknown	PREDICTED: UBP1-associated protein 2C-like [Solanum tuberosum]
RHC12H2G0169.2.gene	15.8059	17.2305	15.833	18.217	17.7989	18.8032	15.5639	14.514	14.6597	15.9512	16.103	17.0323	16.3585	18.4516	15.4364	11.8015	11.4458	12.1912	14.2656	13.966	19.186	11.7916	10.4174	11.156	Function unknown	PREDICTED: stress response protein NST1 [Solanum tuberosum]
RHC12H2G0168.2.gene	12.0633	10.4103	12.2165	21.7476	20.2181	23.7839	8.81449	8.12589	9.13524	14.0924	13.9427	12.9941	8.90327	16.3511	7.65265	10.5248	10.8922	11.6248	16.6404	17.4793	15.7506	20.0636	18.4809	20.1064	Function unknown	PREDICTED: multiple organellar RNA editing factor 8, chloroplastic/mitochondrial-like [Solanum tuberosum]
RHC12H2G0167.2.gene	12.9588	12.7575	10.926	14.4775	14.5723	15.8616	15.3732	17.4974	16.2395	14.417	13.4049	14.566	12.9913	15.4012	12.7834	17.7702	20.1821	19.9773	15.1459	13.7371	14.2328	22.0142	22.5205	22.9833	Energy production and conversion	phosphoenolpyruvate carboxylase [Solanum tuberosum]
RHC12H2G0165.2.gene	7.27758	7.31567	6.51986	7.3298	8.20077	8.0387	5.10349	5.02198	5.26889	4.79458	5.28195	4.83613	3.39762	6.17836	4.26921	6.13286	6.44943	7.24697	6.12906	5.83204	5.80716	7.22691	4.96864	6.13138	Function unknown	PREDICTED: peptide-N4-(N-acetyl-beta-glucosaminyl)asparagine amidase A-like [Solanum tuberosum]
RHC12H2G0164.2.gene	3.05265	3.30245	3.98022	7.5217	6.54559	6.28336	3.01611	2.85744	3.70516	4.83397	6.20937	4.12412	1.23693	5.23776	1.79685	4.60174	4.64546	4.61315	5.86149	4.77442	5.37707	6.75485	5.48654	6.17651	Function unknown	PREDICTED: uncharacterized CRM domain-containing protein At3g25440, chloroplastic-like [Solanum tuberosum]
RHC12H2G0163.2.gene	31.5826	26.6231	36.903	40.6601	30.5053	46.715	34.4203	26.3182	26.7828	25.1716	31.791	29.8101	28.4912	24.5005	27.9949	46.2586	40.5044	37.7994	34.3736	25.23	29.6013	49.1333	36.3353	37.9499	Transcription	PREDICTED: multiprotein-bridging factor 1b-like [Solanum tuberosum]
RHC12H2G0159.2.gene	0.635057	0.520124	0.757743	0	1.26927	1.21376	0.705411	0.912993	0.705512	1.11841	0.742909	1.26667	0.393764	1.12044	0.398514	0.622467	1.10996	0	1.35883	1.29206	1.87702	1.38838	1.3242	1.19247	Function unknown	PREDICTED: putative pentatricopeptide repeat-containing protein At1g53330 [Solanum tuberosum]
RHC12H2G0156.2.gene	4.34887	4.76807	3.69094	11.2836	13.7249	10.254	6.11128	8.32404	6.08661	7.72518	5.47485	5.75203	4.79828	7.45488	7.22084	9.31308	7.91313	6.81753	6.58019	6.14496	6.9021	8.35995	10.0398	8.95508	Signal transduction mechanisms	PREDICTED: probable LRR receptor-like serine/threonine-protein kinase At1g53430 [Solanum tuberosum]
RHC12H2G0149.2.gene	0.630108	0.697025	0.301349	1.29086	1.73123	0	0	0	0	0	0	0	0.087582	1.44677	0	0.720547	0	0	0	0	0	0	2.36562	0	Cell cycle control, cell division, chromosome partitioning	PREDICTED: anaphase-promoting complex subunit 6 [Solanum tuberosum]
RHC12H2G0147.2.gene	38.6897	40.1971	44.9439	33.2183	40.5963	36.8977	33.114	36.7222	33.1993	51.3581	54.9132	52.8151	36.7755	49.4673	34.8818	39.7496	42.3252	48.4494	50.9785	51.3545	60.4713	37.4856	38.1931	42.4305	Carbohydrate transport and metabolism	glucose-6-phosphate isomerase [Solanum tuberosum]
RHC12H2G0146.2.gene	114.478	115.408	108.87	60.0338	53.602	56.6985	110.511	100.499	126.184	49.6005	43.7853	46.8388	85.9683	64.6422	74.2648	75.9164	87.2153	82.3694	62.0278	63.7649	65.0119	53.334	45.4236	53.4348	Translation, ribosomal structure and biogenesis	PREDICTED: 50S ribosomal protein L13, chloroplastic-like [Solanum tuberosum]
RHC12H2G0141.2.gene	3.44706	8.75159	4.27322	0	4.8977	1.87684	2.39533	3.04866	0	1.41728	1.44067	0	0.126949	0.755809	0.084015	3.42876	2.4086	2.18473	0	0	0	0	0.727924	0	Posttranslational modification, protein turnover, chaperones	profilin-1 [Solanum lycopersicum]
RHC12H2G0139.2.gene	8.15226	2.86503	6.94319	5.35195	10.6716	9.73726	4.11922	5.08929	4.56975	8.71318	7.90244	8.95249	5.64789	8.82186	6.19816	7.348	7.34352	5.79896	9.00653	7.89989	8.07218	8.56076	8.9542	8.55255	Function unknown	PREDICTED: uncharacterized protein LOC102588968 isoform X1 [Solanum tuberosum]
RHC12H2G0138.2.gene	6.4972	7.51427	5.31477	7.57474	8.98775	8.83961	5.69307	4.88928	5.27059	7.61963	7.17328	6.62019	4.6034	8.49218	3.44338	4.76308	7.37389	6.80169	7.85588	7.88524	8.2136	7.23512	7.82872	6.25813	Function unknown	PREDICTED: uncharacterized protein LOC102588968 isoform X3 [Solanum tuberosum]
RHC12H2G0134.2.gene	0.670915	0.240185	0.076341	1.90131	2.52417	1.53294	0.179695	0.442907	0.38857	0.763291	0.865751	1.00213	0.428692	1.63895	0.616669	1.10245	1.38004	1.54934	2.7181	1.56551	2.03177	1.76874	1.5006	0.666394	Secondary metabolites biosynthesis, transport and catabolism	PREDICTED: cytochrome P450 CYP736A12 [Solanum lycopersicum]
RHC12H2G0132.2.gene	1.26026	1.4341	1.43099	0.499391	0	0.17534	0.095086	0	0.043014	0.189036	0	0.23125	0.394398	0.191997	0.277209	0	0	0.120947	0.235944	0.222411	0	0	0.138133	0	--	PREDICTED: chromatin modification-related protein EAF1 B-like [Solanum tuberosum]
RHC12H2G0131.2.gene	5.2445	4.2403	3.55351	2.27271	2.66769	1.99855	2.78166	2.36986	2.73817	3.0196	2.72191	2.7914	3.2588	1.38692	3.76358	2.67561	3.0371	2.4075	1.49017	2.688	2.77906	2.88123	3.2381	2.92872	--	PREDICTED: uncharacterized protein LOC102597903 [Solanum tuberosum]
RHC12H2G0130.2.gene	1.0518	1.75788	1.5277	0.711743	1.03532	1.25455	1.70285	0.907648	2.05198	0.419824	0.773925	0.779637	1.37342	0.836347	1.0573	1.81927	0.498162	1.6222	1.28312	0.565853	0.95232	1.03261	0.788166	0.953827	--	PREDICTED: uncharacterized protein LOC102597903 [Solanum tuberosum]
RHC12H2G0127.2.gene	25.5048	23.4956	23.7228	14.489	17.7684	14.362	15.7279	13.6625	17.7343	15.2685	14.3429	18.3552	11.3797	17.2252	11.3047	17.7312	21.6145	21.0973	18.0891	16.6379	15.2498	19.0235	17.4786	18.7366	--	PREDICTED: uncharacterized protein LOC102597263 [Solanum tuberosum]
RHC12H2G0124.2.gene	33.7987	23.7913	23.861	17.9269	22.2504	18.7524	26.4439	14.5077	15.7787	23.9092	21.649	24.822	17.2827	25.2516	13.1532	16.2943	18.3979	22.5147	24.4097	15.5709	27.6661	18.422	18.536	13.3121	Transcription	PREDICTED: homeobox-leucine zipper protein ATHB-15-like [Solanum tuberosum]
RHC12H2G0121.2.gene	0.728327	1.33335	0.92442	1.76112	1.11775	1.15038	0.937398	1.06367	0.757108	1.23882	1.26179	0.948286	0.731309	1.20577	0.776309	1.22532	0.936532	1.30978	1.06112	1.67244	0.903054	1.15172	1.28996	0.966445	Translation, ribosomal structure and biogenesis	PREDICTED: phenylalanine--tRNA ligase, chloroplastic/mitochondrial [Nicotiana sylvestris]
RHC12H2G0120.2.gene	8.28085	9.66442	10.605	9.78483	15.1228	11.8257	8.69384	10.5605	11.28	8.59802	11.3711	8.67236	8.48196	8.22786	8.62195	8.33904	8.58728	12.5153	14.9918	12.9728	9.91057	11.6301	11.8349	14.6192	Posttranslational modification, protein turnover, chaperones	PREDICTED: probable inactive ATP-dependent zinc metalloprotease FTSHI 2, chloroplastic [Solanum tuberosum]
RHC12H2G0119.2.gene	9.42739	9.75715	6.23058	9.71897	6.2821	12.2141	9.806	10.3961	8.65353	8.79746	11.1445	9.04744	9.18417	5.63707	7.19366	10.6145	11.0265	9.26582	7.87799	9.46753	8.32688	11.9049	13.2923	12.7045	Signal transduction mechanisms	PREDICTED: serine/threonine protein phosphatase 2A 55 kDa regulatory subunit B beta isoform-like isoform X2 [Solanum tuberosum]
RHC12H2G0116.2.gene	15.7141	13.2358	12.6005	13.1193	17.0465	24.8413	8.34705	9.27791	12.3621	28.246	21.3934	14.299	7.81633	24.8811	12.4163	12.4209	22.8317	28.7357	17.2364	31.1192	15.8793	17.0089	17.4441	24.3731	Posttranslational modification, protein turnover, chaperones	PREDICTED: ubiquitin carboxyl-terminal hydrolase 6 [Solanum tuberosum]
RHC12H2G0115.2.gene	0.412802	0.145453	0.552574	0.438735	0.540626	0.391498	0.597658	0.580109	0.432018	0.356503	0.411986	0.626625	0.63368	0.29591	0.758794	0.620384	0.708662	0.366805	0.314787	0.43666	0.605057	0.362114	0.470713	0.505272	Function unknown	PREDICTED: probable disease resistance RPP8-like protein 2 [Solanum tuberosum]
RHC12H2G0114.2.gene	1.01203	0.61856	0.667575	1.50632	1.06705	0.646633	0.766034	1.27799	1.01888	0.956331	0.705816	1.21009	1.09441	1.09249	1.74643	0.802529	1.92703	1.54146	0.720035	0.49698	0.702844	1.08561	1.43844	0.861039	Function unknown	PREDICTED: probable disease resistance RPP8-like protein 2 [Solanum tuberosum]
RHC12H2G0113.2.gene	4.65834	1.09375	3.85008	4.49482	4.27757	4.21573	3.64077	4.58401	3.33365	4.64147	6.12942	5.08449	3.61903	3.0776	1.50109	4.49923	2.83881	3.28915	3.18351	4.07802	4.48836	3.17488	4.2598	3.00796	--	PREDICTED: protein PHLOEM PROTEIN 2-LIKE A8-like [Solanum tuberosum]
RHC12H2G0112.2.gene	1.76871	1.50521	2.22408	2.56948	1.61585	1.84409	2.59986	4.01851	2.79698	1.86577	1.54672	1.76019	1.72873	1.61328	1.39625	2.79134	1.66322	1.92735	1.99764	2.35471	2.11356	2.19657	2.2698	2.28438	--	PREDICTED: protein PHLOEM PROTEIN 2-LIKE A8-like [Solanum tuberosum]
RHC12H2G0111.2.gene	0.358884	0.115243	0.2497	0	0.041387	0.162679	0.033978	0.181093	0.059552	0	0.043314	0.16556	0.065222	0.10112	0.132223	0.194915	0.020848	0	0.190307	0	0.078948	0	0.128743	0.07345	--	PREDICTED: protein PHLOEM PROTEIN 2-LIKE A5-like [Solanum tuberosum]
RHC12H2G0109.2.gene	0.342908	0.129627	0.409724	0.266164	0	0.666647	0.284168	0.396101	0.135432	0.233012	0.037357	0.194463	0.086686	0.222904	0.289604	0.287861	0.229856	0.172701	0.102645	0.247411	0.117967	0.040897	0.343521	0.192653	Function unknown	PREDICTED: acyl-coenzyme A thioesterase 9, mitochondrial-like [Solanum tuberosum]
RHC12H2G0105.2.gene	4.33642	5.97091	4.47664	6.14342	6.19719	5.55244	3.73588	2.8375	2.87295	3.53651	3.52076	4.6501	2.9942	5.93859	2.33446	3.6821	3.61297	5.61077	6.37456	6.00293	4.13414	3.59821	4.86301	6.52561	Function unknown	PREDICTED: AT-rich interactive domain-containing protein 4 [Solanum tuberosum]
RHC12H2G0104.2.gene	2.08649	2.38422	2.13719	3.86807	4.78681	4.23163	2.56253	3.29565	3.22873	4.0361	5.54659	4.22602	4.77632	4.18652	4.81889	4.0042	3.55714	4.07554	4.72605	4.45813	3.98327	4.31571	4.23477	4.85515	--	PREDICTED: ethylene-responsive transcription factor RAP2-12-like [Solanum tuberosum]
RHC12H2G0103.2.gene	0.400715	2.61873	2.49531	0.133506	0.675858	1.8595	1.66555	1.89012	1.00028	3.4928	0.670006	3.83165	0.906878	3.84231	0.801314	2.31996	2.86023	2.84306	3.69984	2.80661	3.56263	2.32049	0.291551	1.50216	Function unknown	PREDICTED: GDSL esterase/lipase 5-like [Solanum tuberosum]
RHC12H2G0077.2.gene	9.18271	11.1468	10.8365	19.6806	17.2091	15.8497	8.07152	5.98862	10.4892	7.95672	13.0888	9.09503	6.36739	8.19786	6.05773	14.7908	12.7072	12.0572	9.20931	9.97745	10.0311	17.2212	21.2384	19.9866	Function unknown	PREDICTED: polyadenylate-binding protein-interacting protein 8-like [Solanum tuberosum]
RHC12H2G0066.2.gene	6.89268	1.58003	6.95031	4.48077	4.78343	5.17217	19.4107	17.0874	16.4826	7.29303	6.88147	7.76094	12.446	1.32026	15.1199	15.5901	14.6886	14.2336	6.55089	6.63583	6.85605	10.663	10.6186	10.1222	Cell wall/membrane/envelope biogenesis	PREDICTED: UDP-glucuronate 4-epimerase 6-like [Solanum tuberosum]
RHC12H2G0060.2.gene	107.56	87.1935	95.1321	405.336	304.904	293.368	75.3727	91.9502	64.5592	130.8	165.866	134.245	66.2769	222.295	65.4463	156.116	140.498	122.664	205.001	183.986	191.503	198.076	242.031	220.556	Cytoskeleton	Tubulin alpha chain [Morus notabilis]
RHC12H2G0059.2.gene	3.25873	3.38217	3.35728	1.22299	1.3863	1.04167	1.1711	1.5124	1.23096	0.379865	0.806084	0.250009	1.49198	0.189432	2.06822	2.21011	0.739254	1.50017	0.171094	0.100809	0.13902	1.13847	1.68599	0.994584	--	PREDICTED: acetyl-CoA-benzylalcohol acetyltransferase-like [Solanum tuberosum]
RHC12H2G0056.2.gene	5.30988	4.39242	6.92771	3.54749	11.1001	10.4065	5.23087	6.65717	1.17422	6.4825	5.595	5.31745	3.66457	4.59006	5.01179	10.6301	6.77359	10.7275	4.07878	6.99581	7.36334	5.98897	8.94704	10.8098	Intracellular trafficking, secretion, and vesicular transport	PREDICTED: 25.3 kDa vesicle transport protein-like [Solanum tuberosum]
RHC12H2G0054.2.gene	1.43288	1.36756	1.16267	2.14499	1.97011	1.17504	1.51229	1.37007	1.17942	2.10293	2.75165	0.090955	0.652753	2.14392	0.6923	1.59361	1.26385	1.29454	3.04397	2.17975	2.72158	1.64829	2.58005	2.16888	Posttranslational modification, protein turnover, chaperones	PREDICTED: peptidyl-prolyl cis-trans isomerase CYP59-like [Solanum tuberosum]
RHC12H2G0051.2.gene	3.35914	9.15747	8.32352	18.542	3.23313	10.1218	3.83079	5.05448	4.57317	6.73933	5.98507	4.5014	12.6188	8.11414	5.60992	5.8596	9.01426	6.15117	6.07557	6.63623	4.61557	8.37145	12.2432	3.65081	Function unknown	PREDICTED: acetylajmalan esterase-like [Solanum tuberosum]
RHC12H2G0048.2.gene	5.18821	5.88342	4.12751	11.7258	11.714	8.79807	3.09682	3.60444	3.87505	5.93361	7.86431	6.72771	4.41563	6.38225	3.44596	8.06542	8.50878	6.67935	5.91852	7.25721	8.28882	8.43648	10.8897	9.74642	Function unknown	PREDICTED: protein C2-DOMAIN ABA-RELATED 4-like [Solanum tuberosum]
RHC12H2G0047.2.gene	2.53824	3.94146	4.29476	4.8247	5.22643	3.75281	3.15515	3.16029	2.8075	3.17493	4.41606	3.44709	3.90918	4.23968	1.83934	2.15774	3.42069	2.76434	4.08153	3.6904	3.60756	3.49835	6.27378	5.58933	Posttranslational modification, protein turnover, chaperones	PREDICTED: geranylgeranyl transferase type-2 subunit beta 1 [Solanum lycopersicum]
RHC12H2G0042.2.gene	1.20172	3.78793	5.51209	3.4889	4.29598	2.67102	2.6073	0.124142	2.01645	2.73018	3.36647	2.06698	1.30855	1.57241	1.38601	2.50905	0.258946	2.08054	2.42526	2.06883	1.92276	4.10072	0	3.02502	--	hypothetical protein A4A49_20915 [Nicotiana attenuata]
[truncated: 38,028 more rows]
